# Supplementary material for: K2CO3-mediated annulation of 1,3-acetonedicarboxylates with 2-fluoro-1-nitroarenes: synthesis of indoles
Source: Royal Society of Chemistry journal article supplement (doi:10.1039/d4ob00488d), 2024-01-01

# Supporting Information

## K<sub>2</sub>CO<sub>3</sub>-Mediated Tandem Annulation of 1,3-Acetonedicarboxylates with 2-Fluoro-1-nitroarenes: Synthesis of Indoles

Meng-Yang Chang,<sup>\*a,b,c</sup> Chin-Ruey Ho<sup>a</sup> and Hsing-Yin Chen<sup>\*a</sup>

<sup>a</sup>Department of Medicinal and Applied Chemistry, Kaohsiung Medical University, Kaohsiung 807, Taiwan.

<sup>b</sup>Department of Medical Research, Kaohsiung Medical University Hospital, Kaohsiung 807, Taiwan.

<sup>c</sup>NPUST College of Professional Studies, National Pingtung University of Science and Technology,  
Pingtung 912, Taiwan.

\*Corresponding author, email: [mychang@kmu.edu.tw](mailto:mychang@kmu.edu.tw) ; [hychen@kmu.edu.tw](mailto:hychen@kmu.edu.tw)

### Table of Contents

|    |                                                                                                           |           |
|----|-----------------------------------------------------------------------------------------------------------|-----------|
| 1. | <sup>1</sup> H NMR and <sup>13</sup> C NMR spectra copies of compounds <b>2c-2e</b>                       | S2~S7     |
| 2. | <sup>1</sup> H NMR, <sup>13</sup> C NMR and <sup>19</sup> F NMR spectra copies of compounds <b>3i, 3k</b> | S8~S13    |
| 3. | <sup>1</sup> H NMR, <sup>13</sup> C NMR and <sup>19</sup> F NMR spectra copies of compounds <b>4a-4ah</b> | S14~S94   |
| 4. | <sup>1</sup> H NMR, <sup>13</sup> C NMR and <sup>19</sup> F NMR spectra copies of compounds <b>5a-5e</b>  | S95~S105  |
| 5. | <sup>1</sup> H NMR and <sup>13</sup> C NMR spectra copies of compounds <b>6a-6b</b>                       | S106~S109 |
| 6. | <sup>1</sup> H NMR, <sup>13</sup> C NMR and <sup>19</sup> F NMR spectra copies of compounds <b>7a-7e</b>  | S110~S120 |
| 7. | <sup>1</sup> H NMR and <sup>13</sup> C NMR spectra copies of compounds <b>8a-8e</b>                       | S121-S130 |
| 8. | X-ray crystal data of compounds <b>4a, 4g, 5c</b> and <b>6b</b>                                           | S131~S138 |
| 9. | Figure S1. Free energy profile from <b>INT-3</b> to <b>INT 4</b>                                          | S139      |

# Compound 2c (<sup>1</sup>H-NMR spectral data)

CHPr

Pulse Sequence: s2pu1

UNITYplus-400 "unity400"

Date: Aug 21 2023

Solvent: CDCl<sub>3</sub>

Ambient temperature

Total 32 repetition

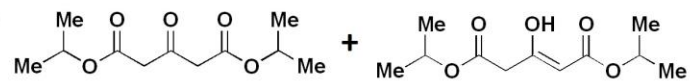

Ratio = 10 : 1

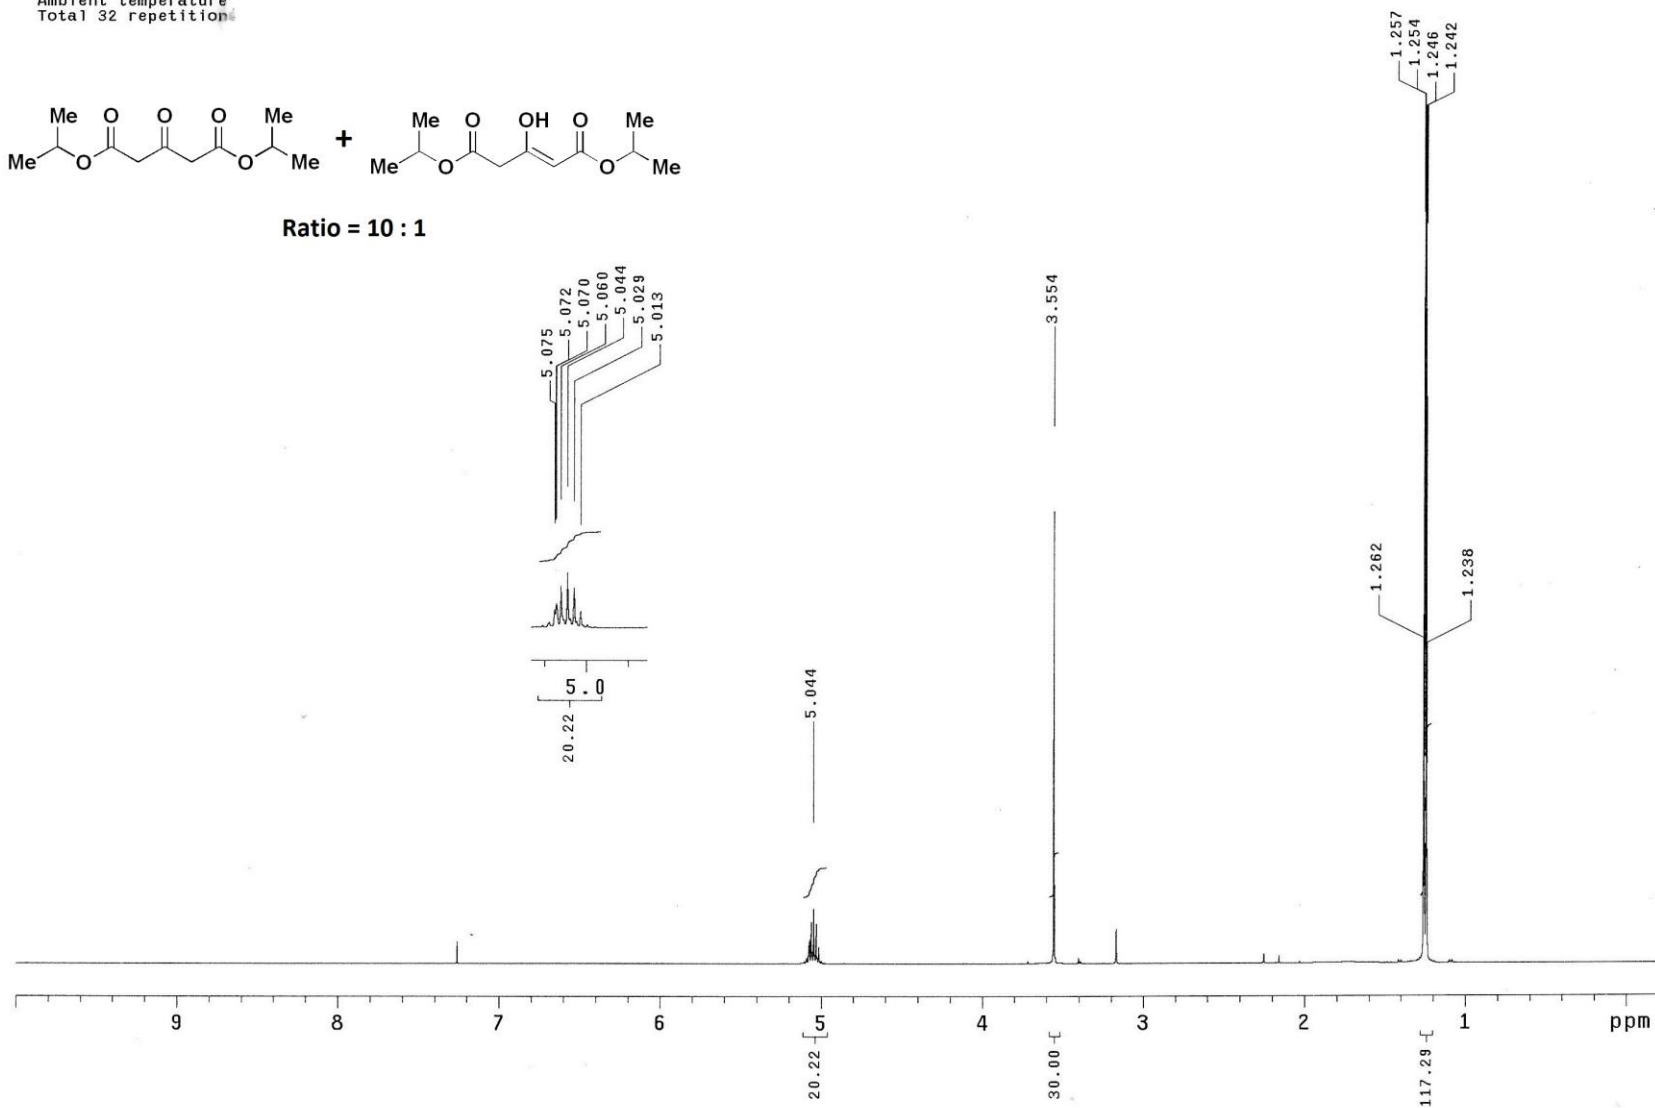

# Compound 2c (<sup>13</sup>C-NMR spectral data)

CH1pr

Pulse Sequence: s2pu1  
 UNITYplus-400 "unity400"  
 Date: Aug 21 2023  
 Solvent: CDCl<sub>3</sub>  
 Ambient temperature  
 Total 816 repetitions

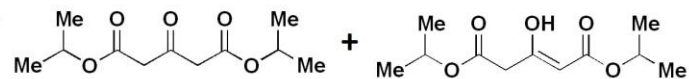

Ratio = 10 : 1

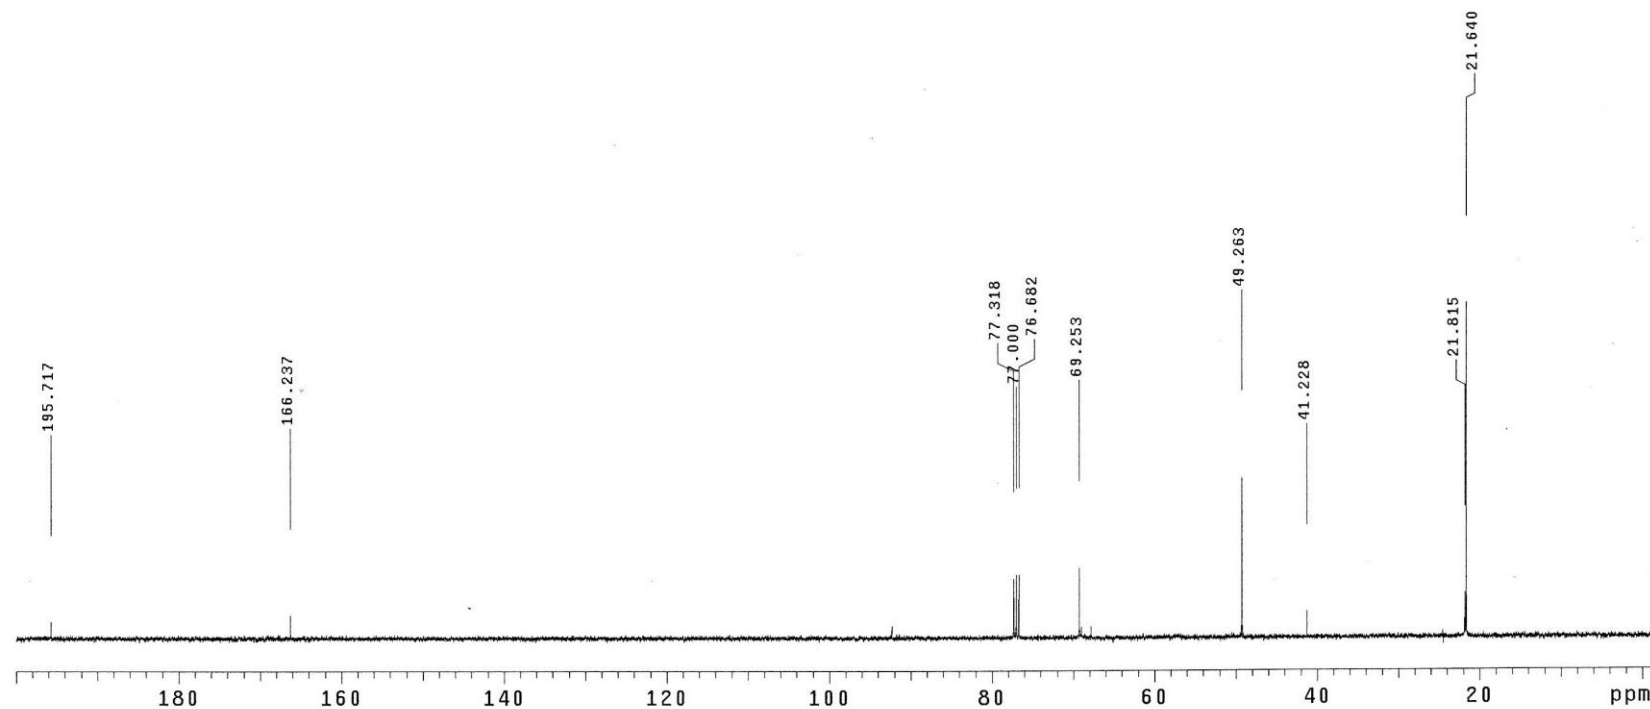

# Compound 2d (<sup>1</sup>H-NMR spectral data)

CH-nBu

Pulse Sequence: s2pu1  
 UNITYplus-400 "unity400"  
 Date: Aug 21 2023  
 Solvent: CDCl<sub>3</sub>  
 Ambient temperature  
 Total 32 repetitions

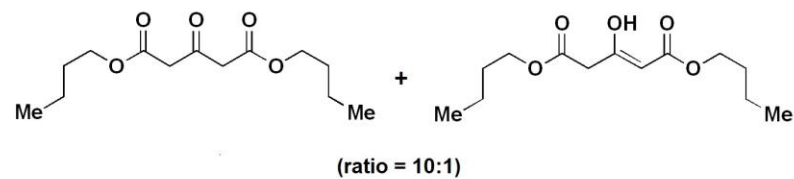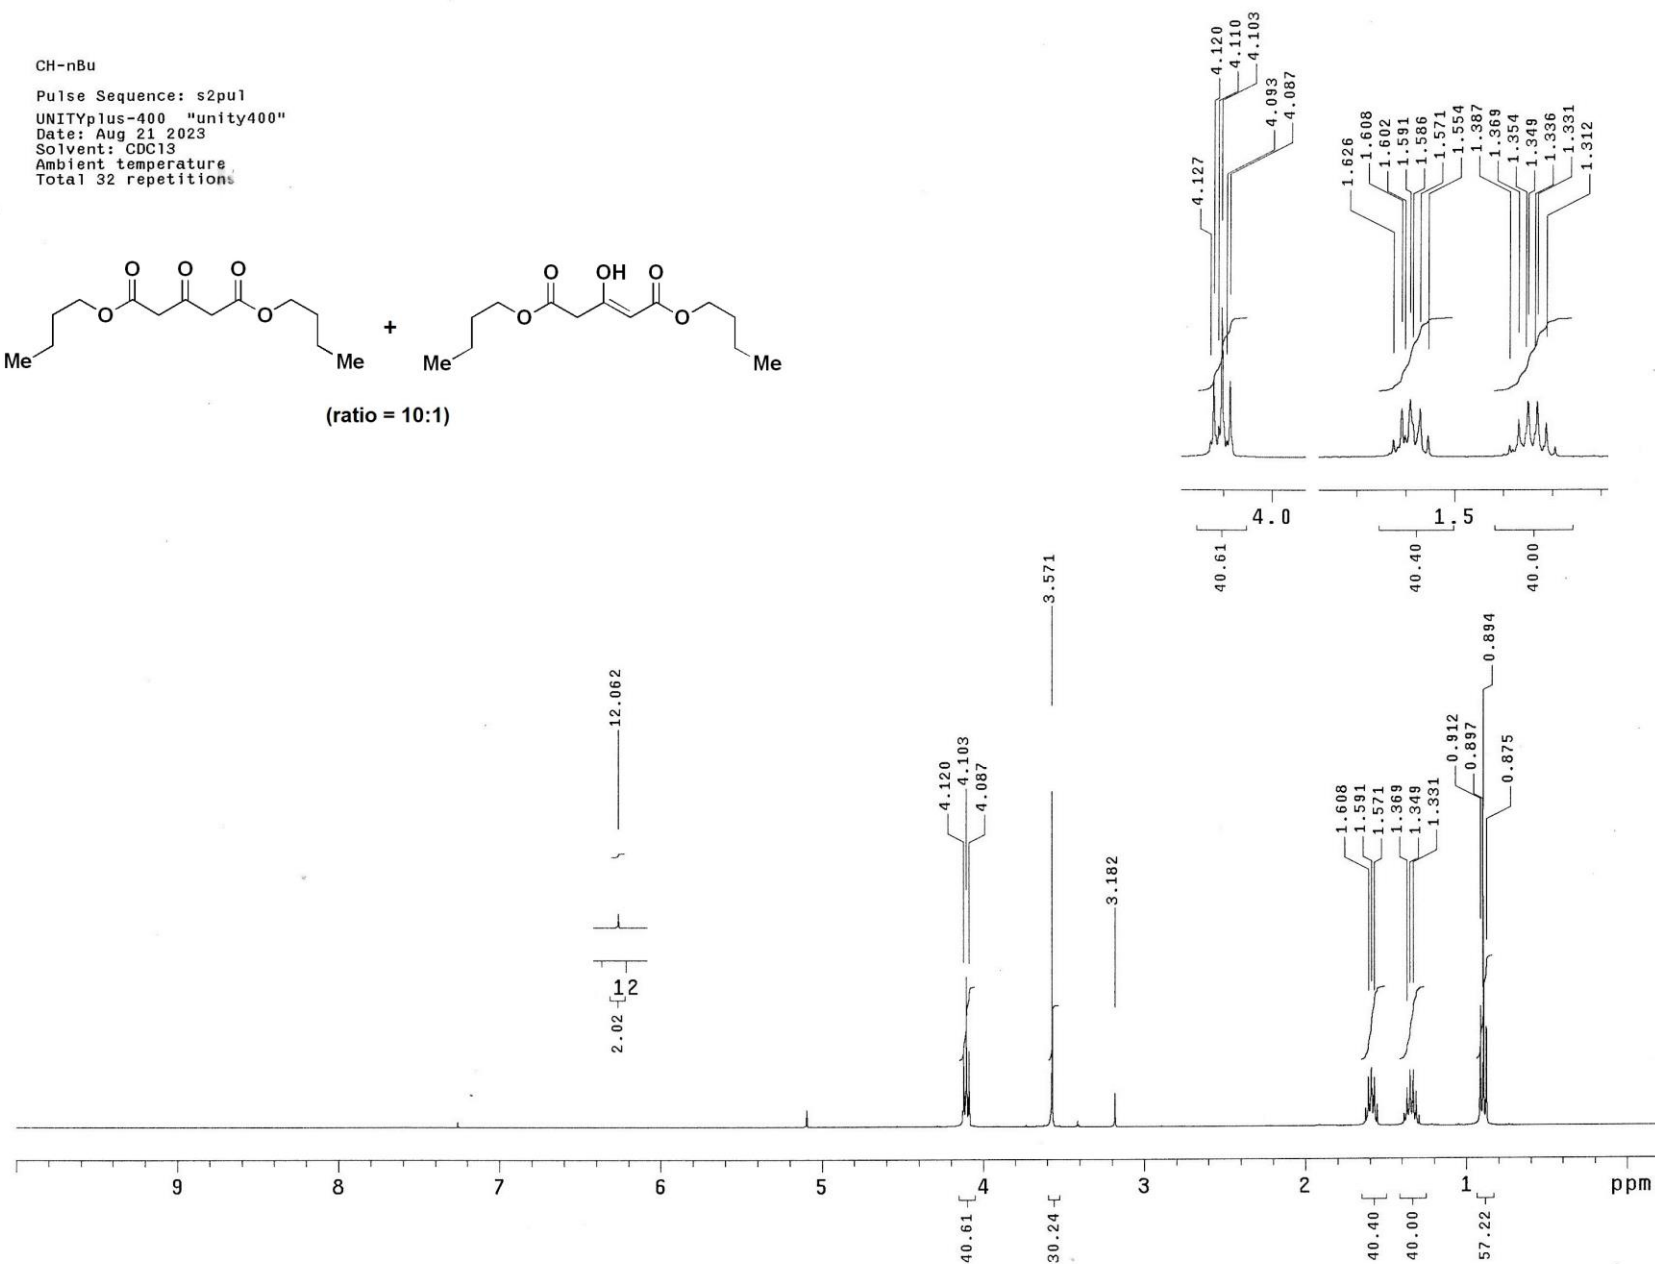



# Compound 2d (<sup>13</sup>C-NMR spectral data)

CH-nBu

Pulse Sequence: s2pu1  
 UNITYplus-400 "unity400"  
 Date: Aug 21 2023  
 Solvent: CDCl<sub>3</sub>  
 Ambient temperature  
 Total 192 repetitions

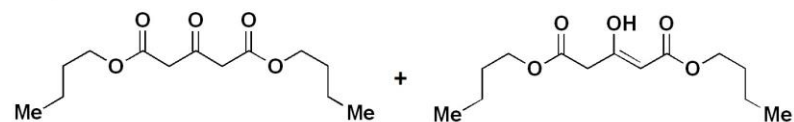

(ratio = 10:1)

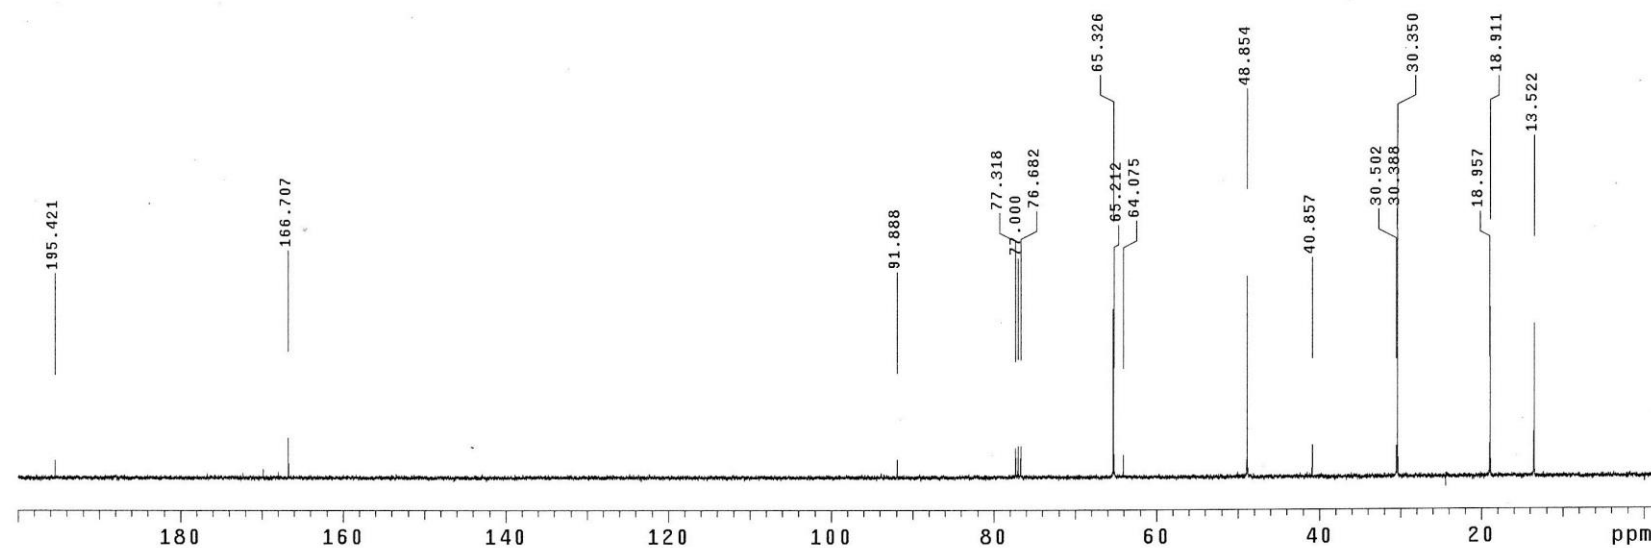

# Compound 2e (<sup>1</sup>H-NMR spectral data)

CHtBu

Pulse Sequence: s2pu1

UNITYplus-400 "unity400"

Date: Aug 24 2023

Solvent: CDCl<sub>3</sub>

Ambient temperature

Total 64 repetitions

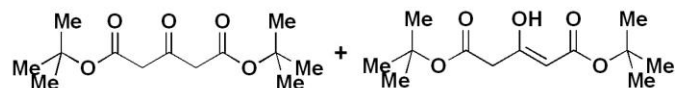

Ratio = 10 : 1

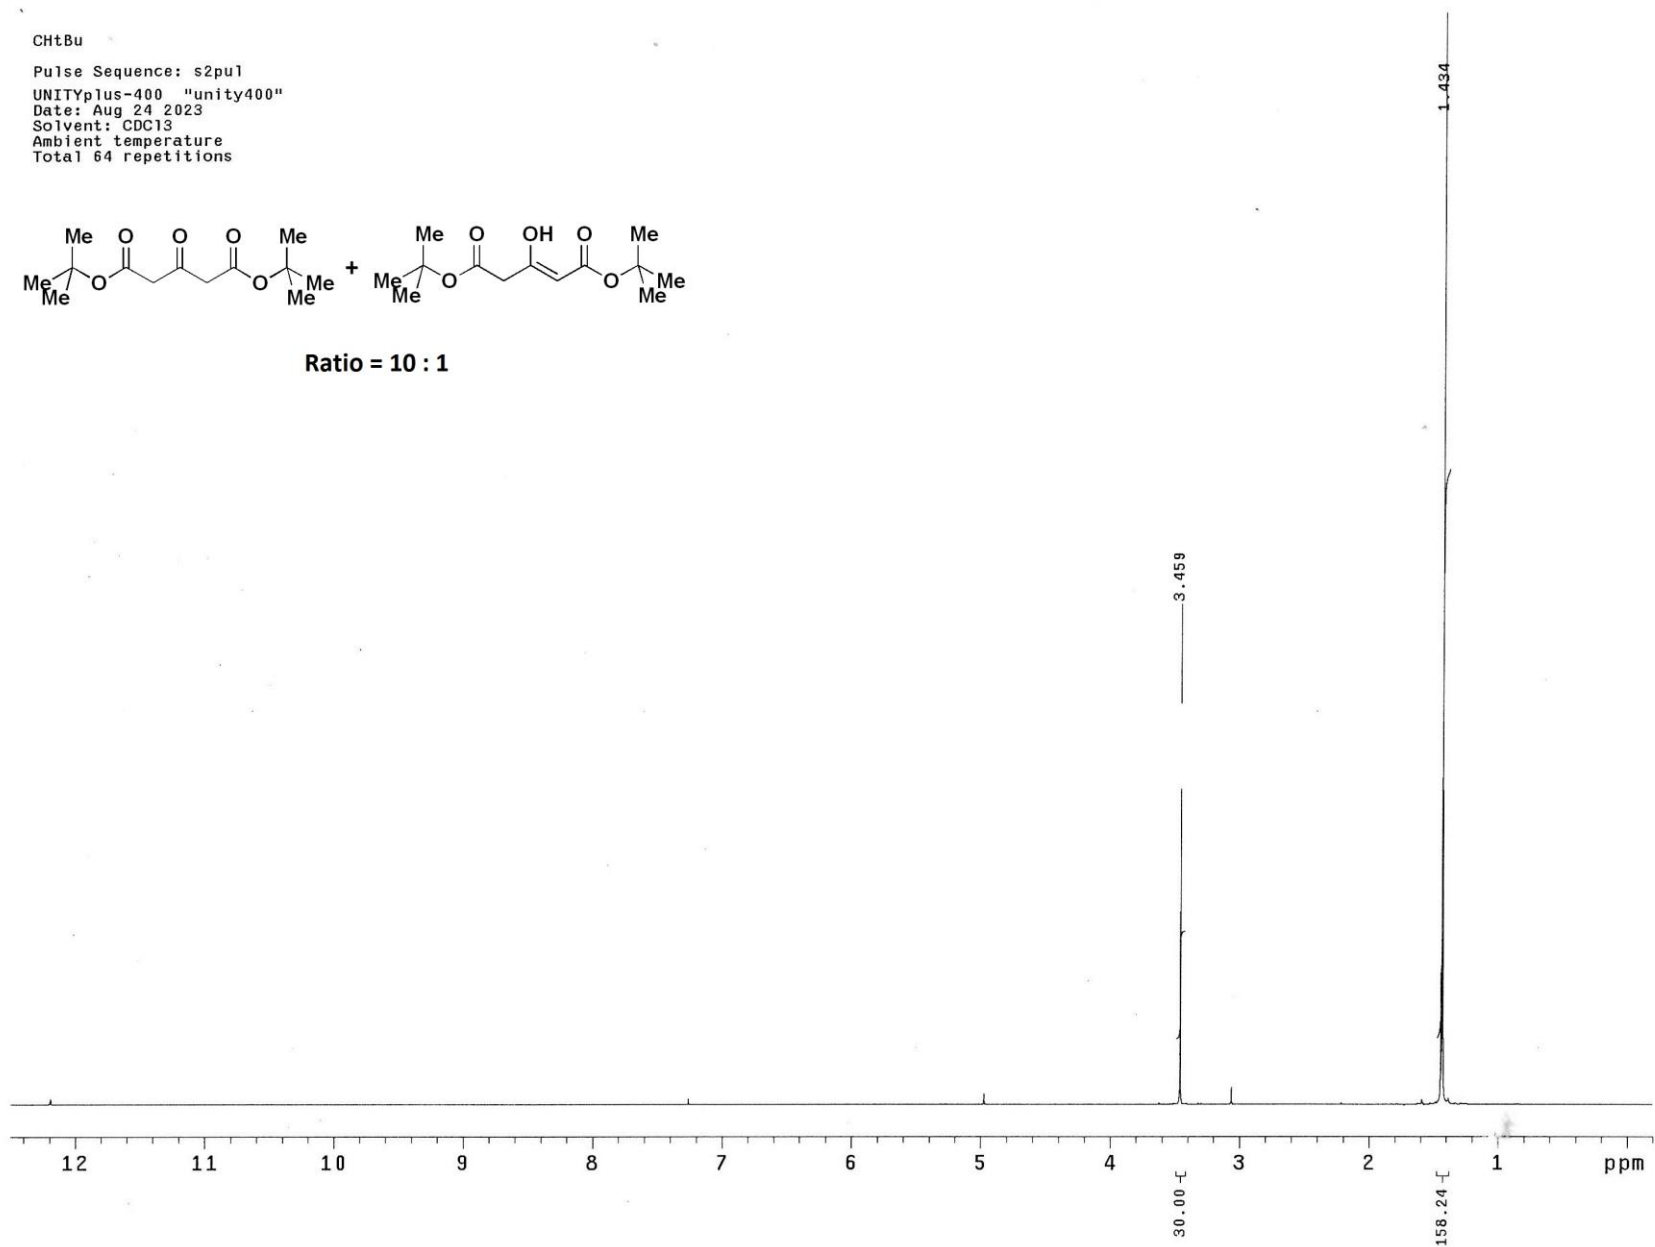

# Compound 2e (<sup>13</sup>C-NMR spectral data)

CHtBu

Pulse Sequence: s2pu1

UNITYplus-400 "unity400"

Date: Aug 24 2023

Solvent: CDCl<sub>3</sub>

Ambient temperature

Total 1120 repetitions

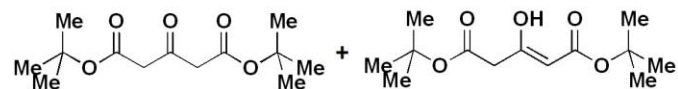

Ratio = 10 : 1

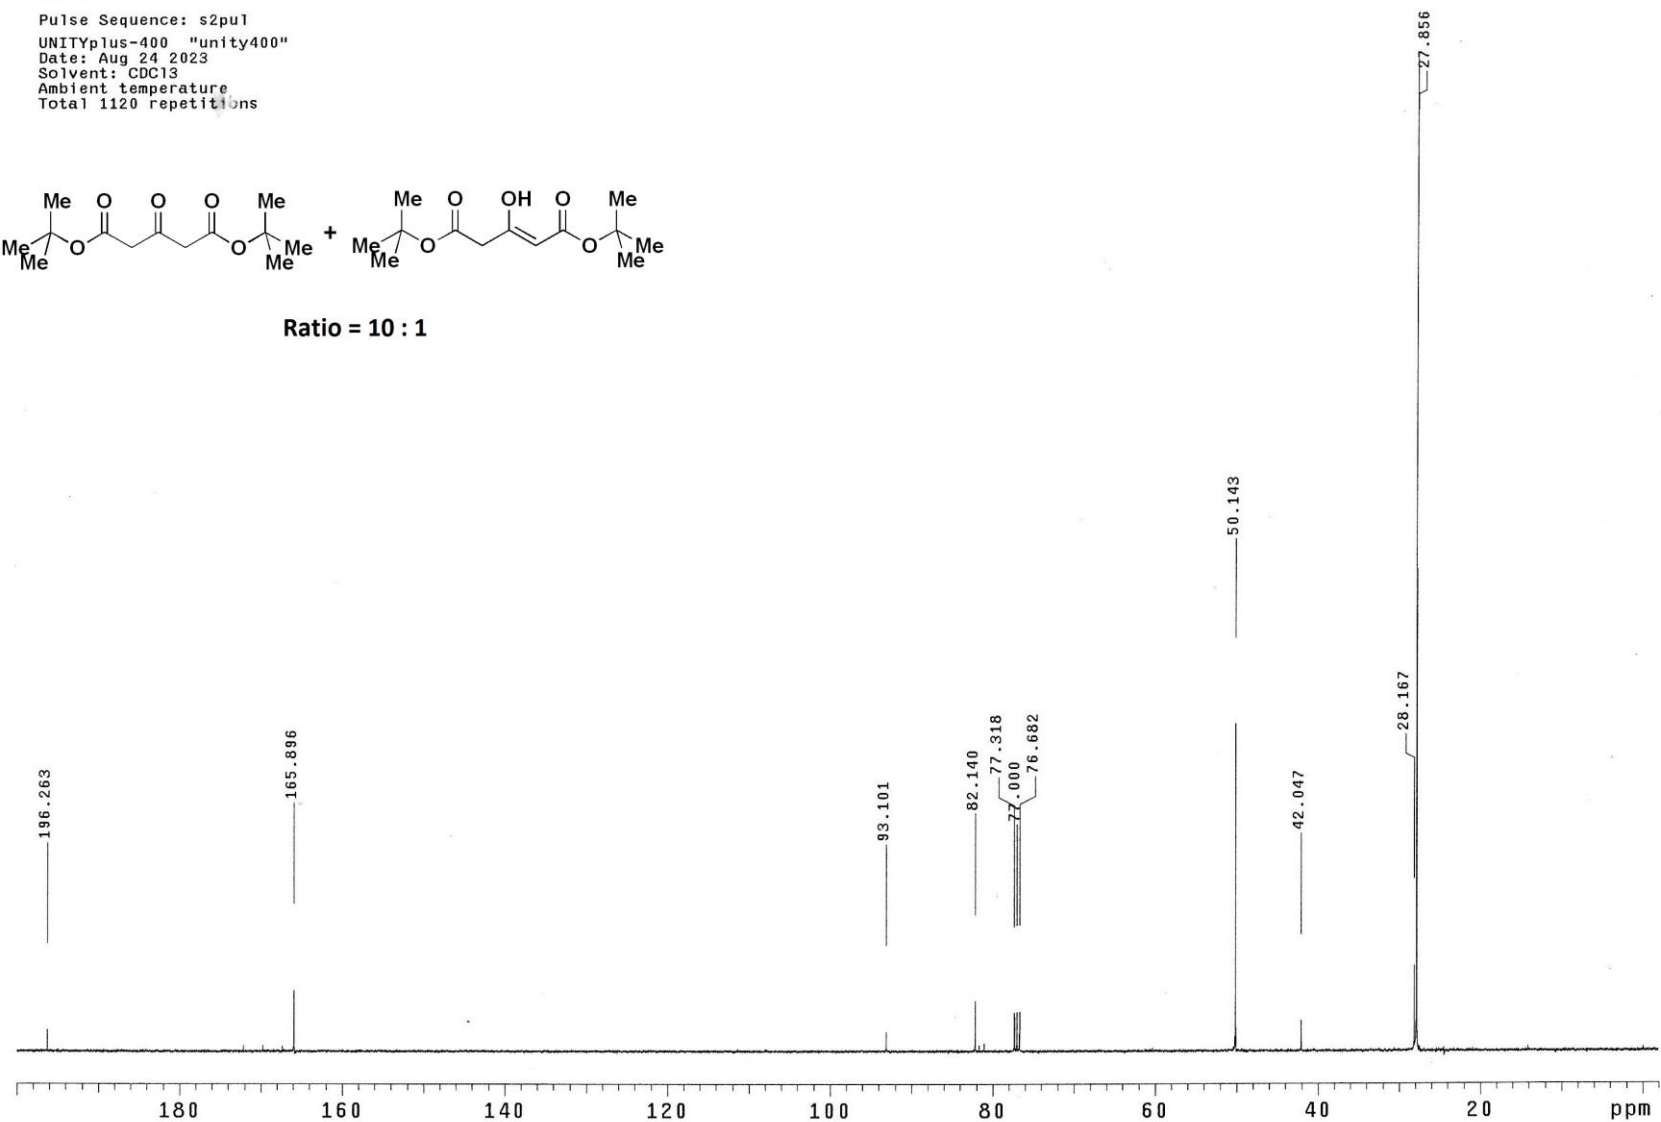

# Compound 3i (<sup>1</sup>H-NMR spectral data)

A1P2Me0Ph

Pulse Sequence: s2pu1

UNITYplus-400 "unity400"

Date: Jul 19 2023

Solvent: pyridine

Ambient temperature

Total 32 repetition

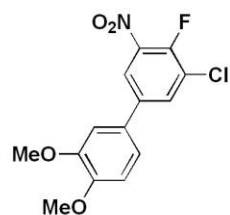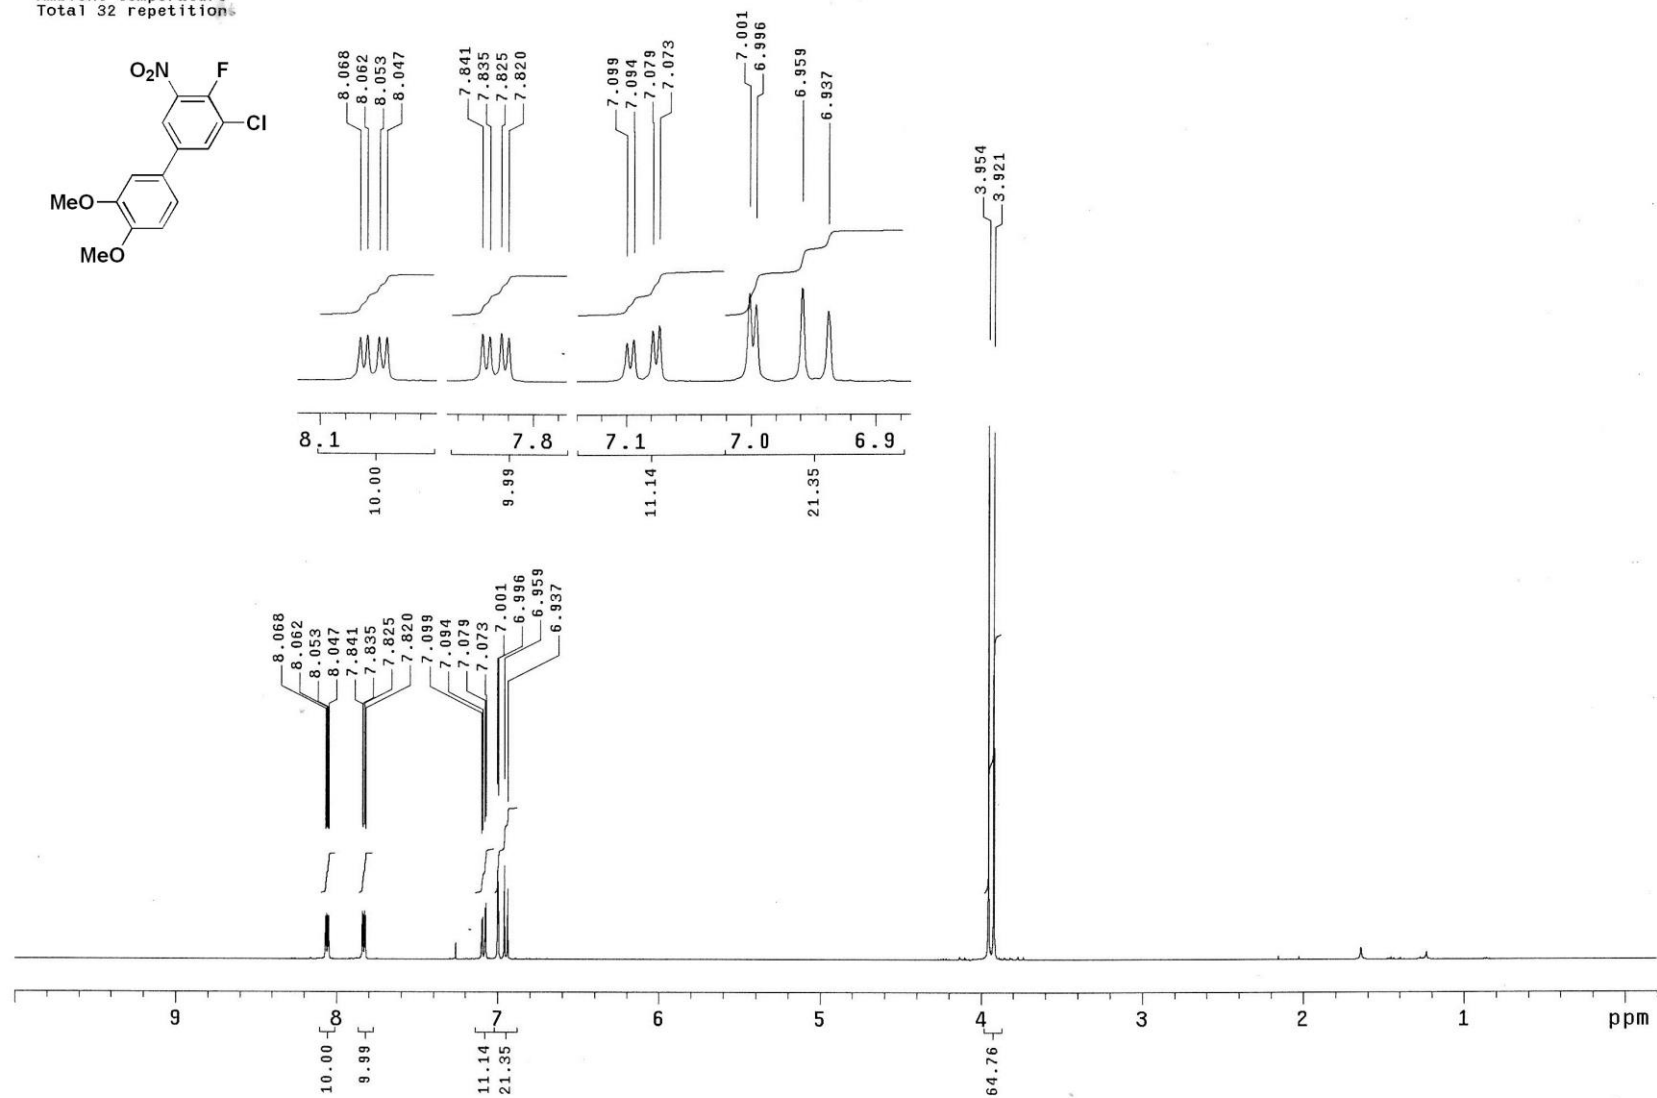

# Compound 3i (<sup>13</sup>C-NMR spectral data)

A1P2Me0Ph

Pulse Sequence: s2pu1

UNITYplus-400 "unity400"

Date: Jul 19 2023

Solvent: CDCl<sub>3</sub>

Ambient temperature

Total 1040 repetitions

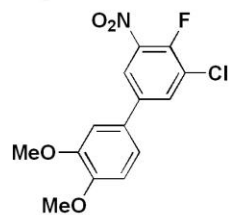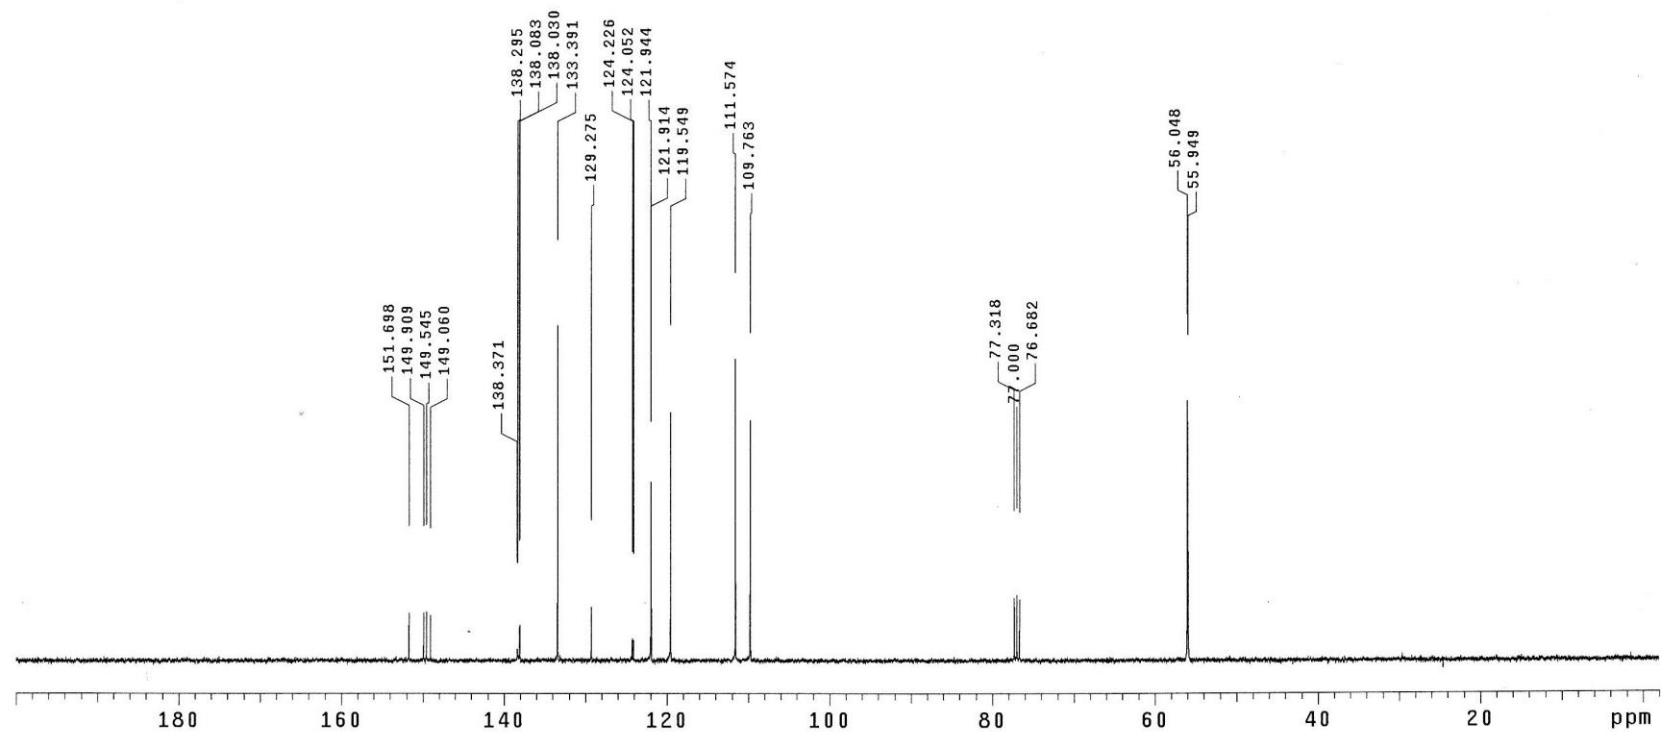

# Compound 3i ( $^{19}\text{F}$ -NMR spectral data)

3i

Pulse Sequence: s2pu1  
Mercury-400BB "MerPlus400"  
Date: Jan 18 2024  
Solvent: cdc13  
Ambient temperature  
Total 172 repetitions

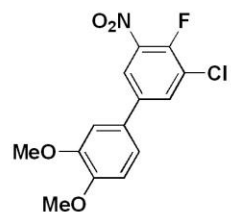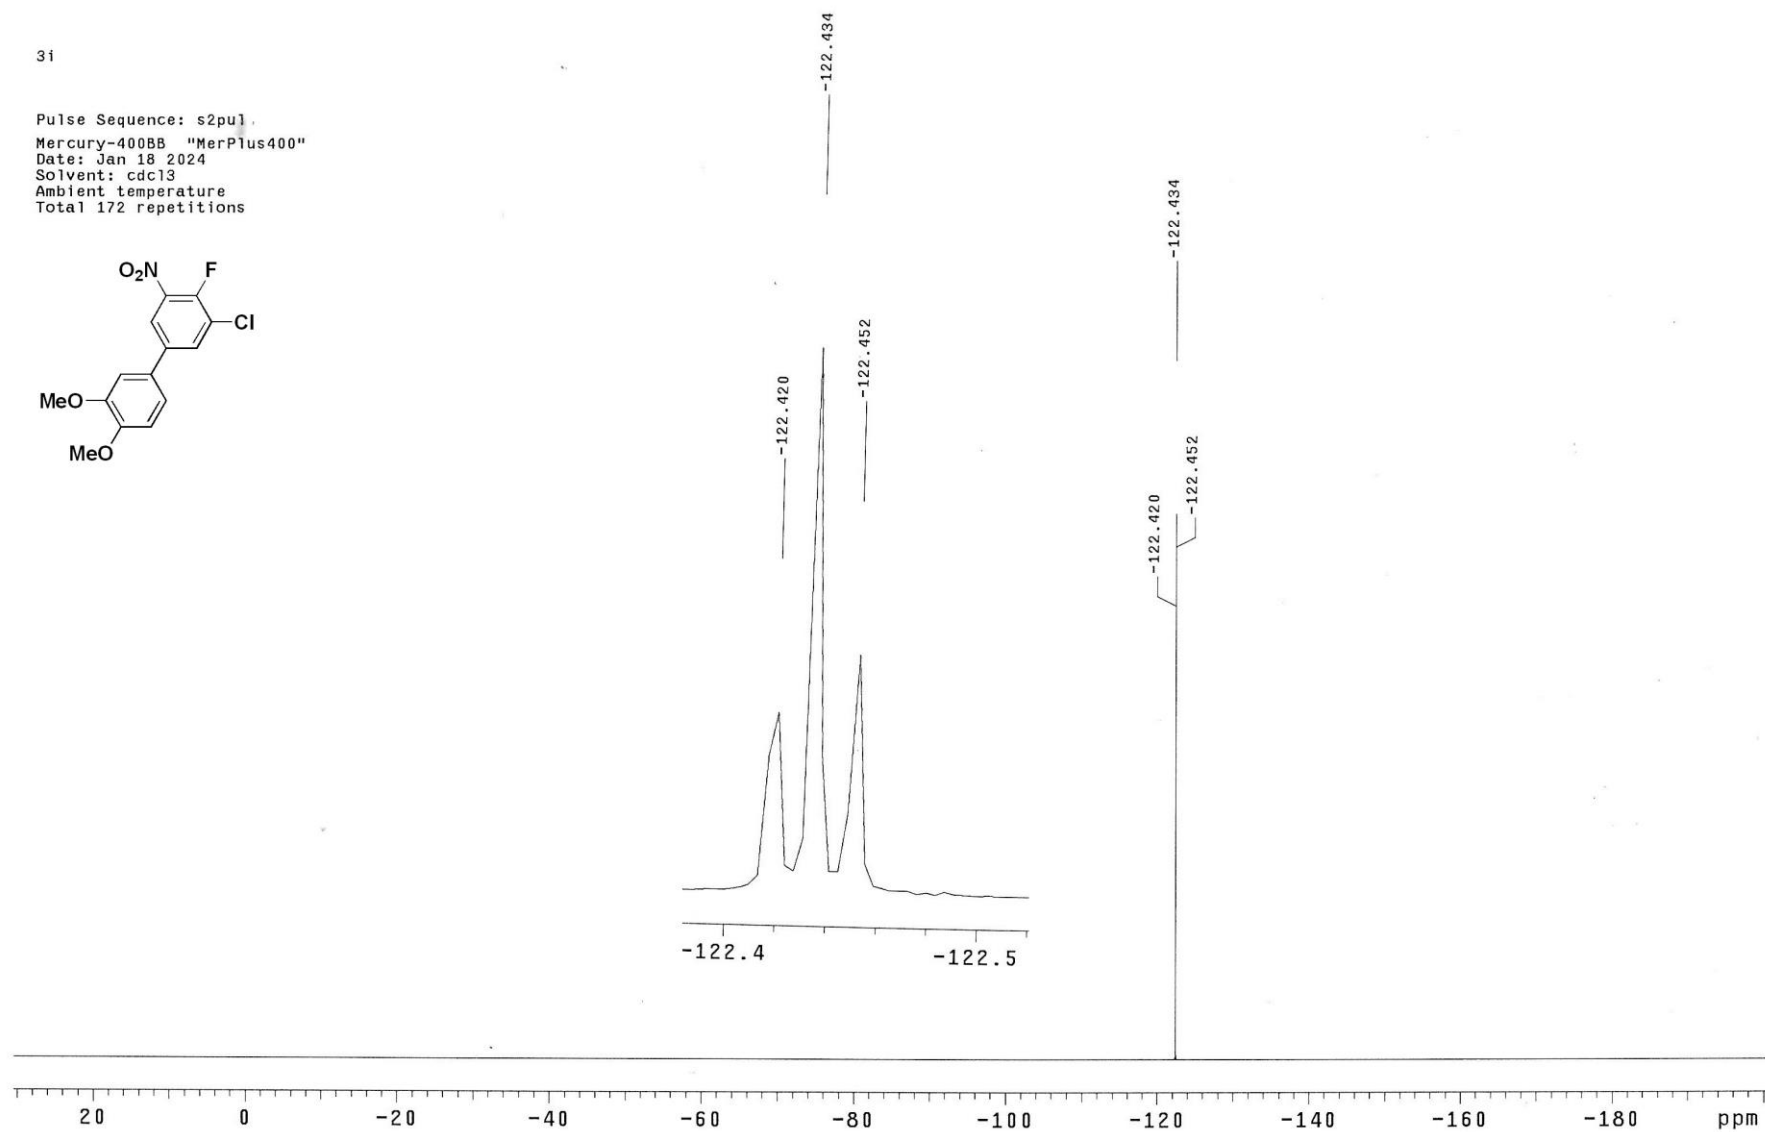

## A1P2NA

Pulse Sequence: s2pu1  
UNITYplus-400 "unity400"  
Date: Aug 2 2023  
Solvent: CDC13  
Ambient temperature  
Total 32 repetitions

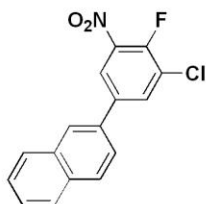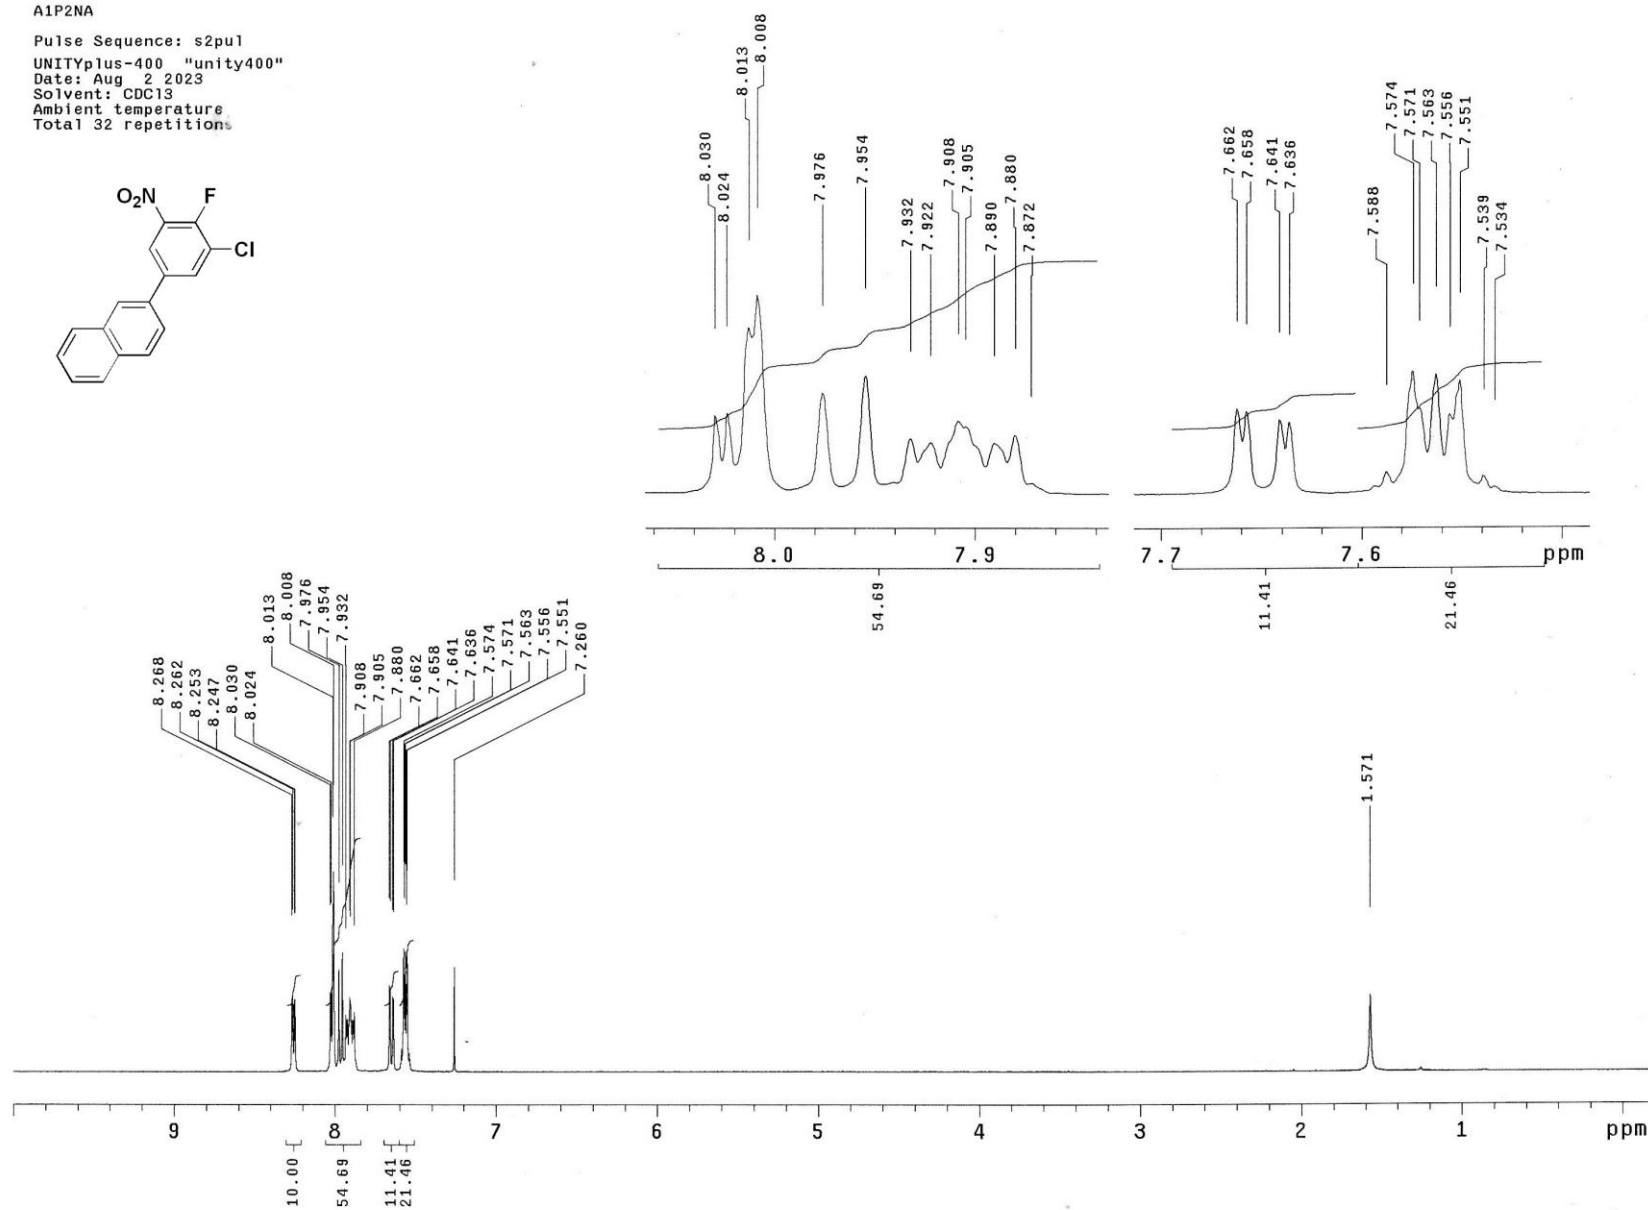

# Compound 3k (<sup>13</sup>C-NMR spectral data)

A1P2NA

Pulse Sequence: s2pu1

UNITYplus-400 "unity400"

Date: Aug 2 2023

Solvent: CDCl<sub>3</sub>

Ambient temperature

Total 3504 repetitions

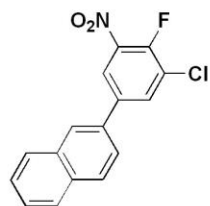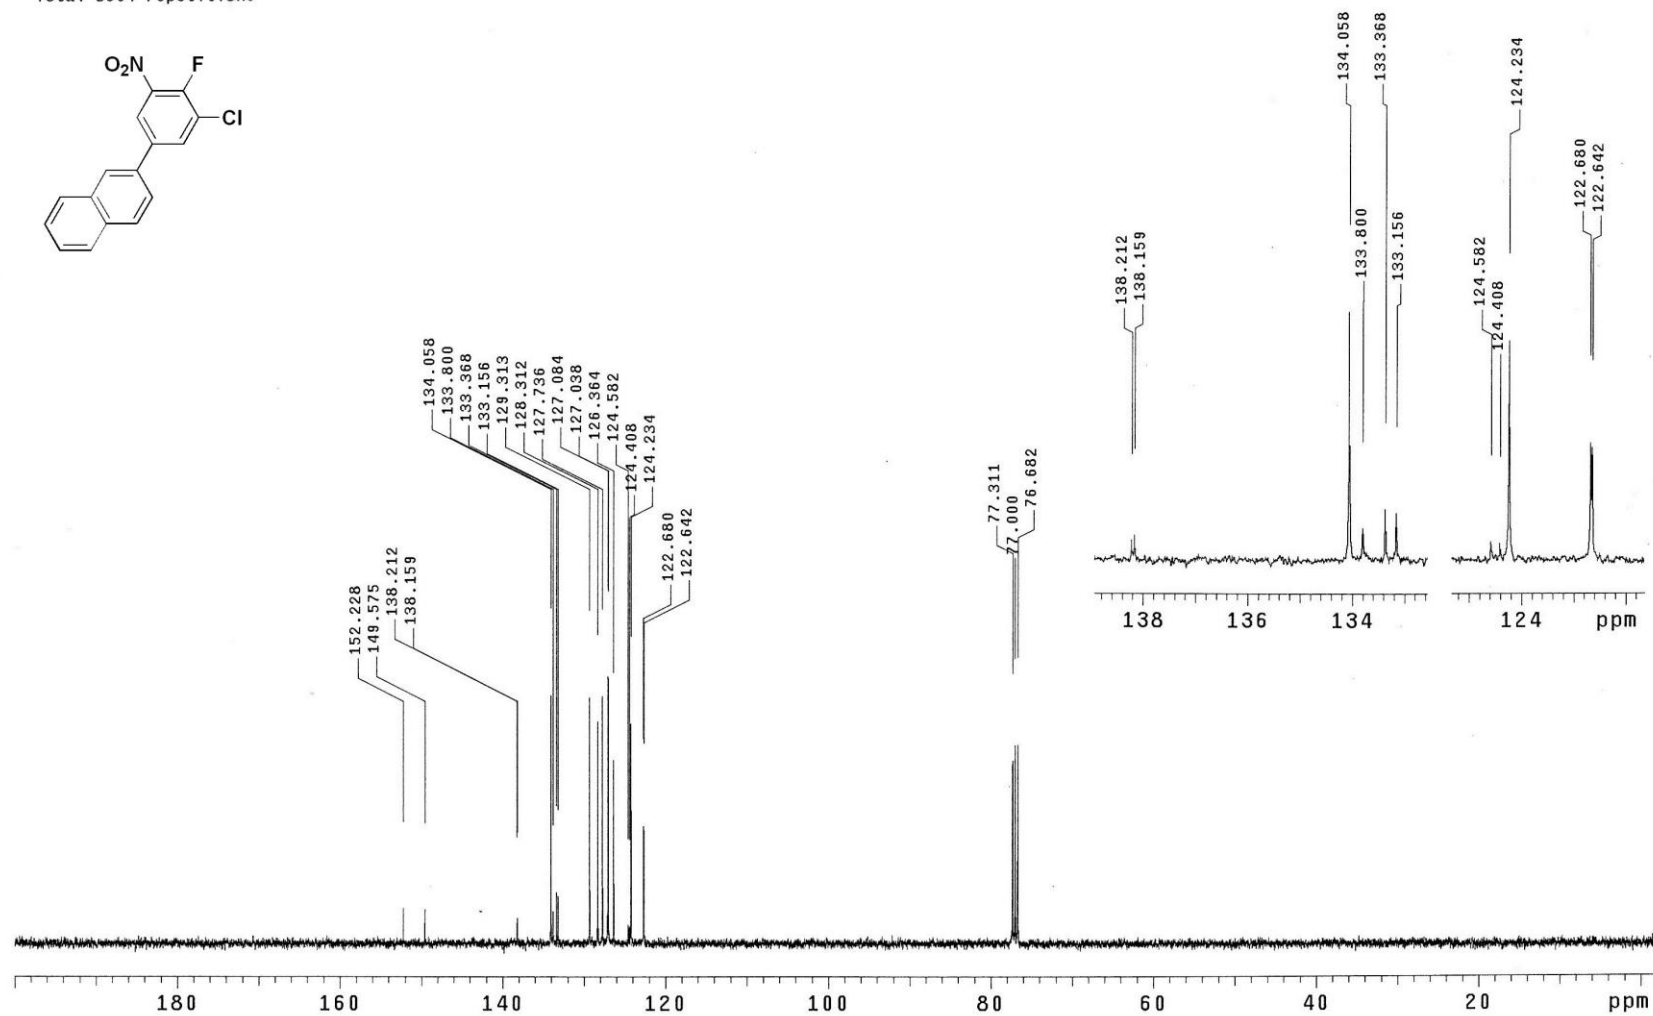



# Compound 3k (<sup>19</sup>F-NMR spectral data)

3k

Pulse Sequence: s2pul  
Mercury-400BB "MerPlus400"  
Date: Jan 18 2024  
Solvent: cdcl3  
Ambient temperature  
Total 96 repetitions

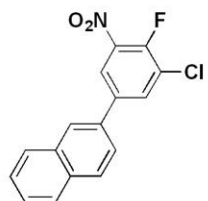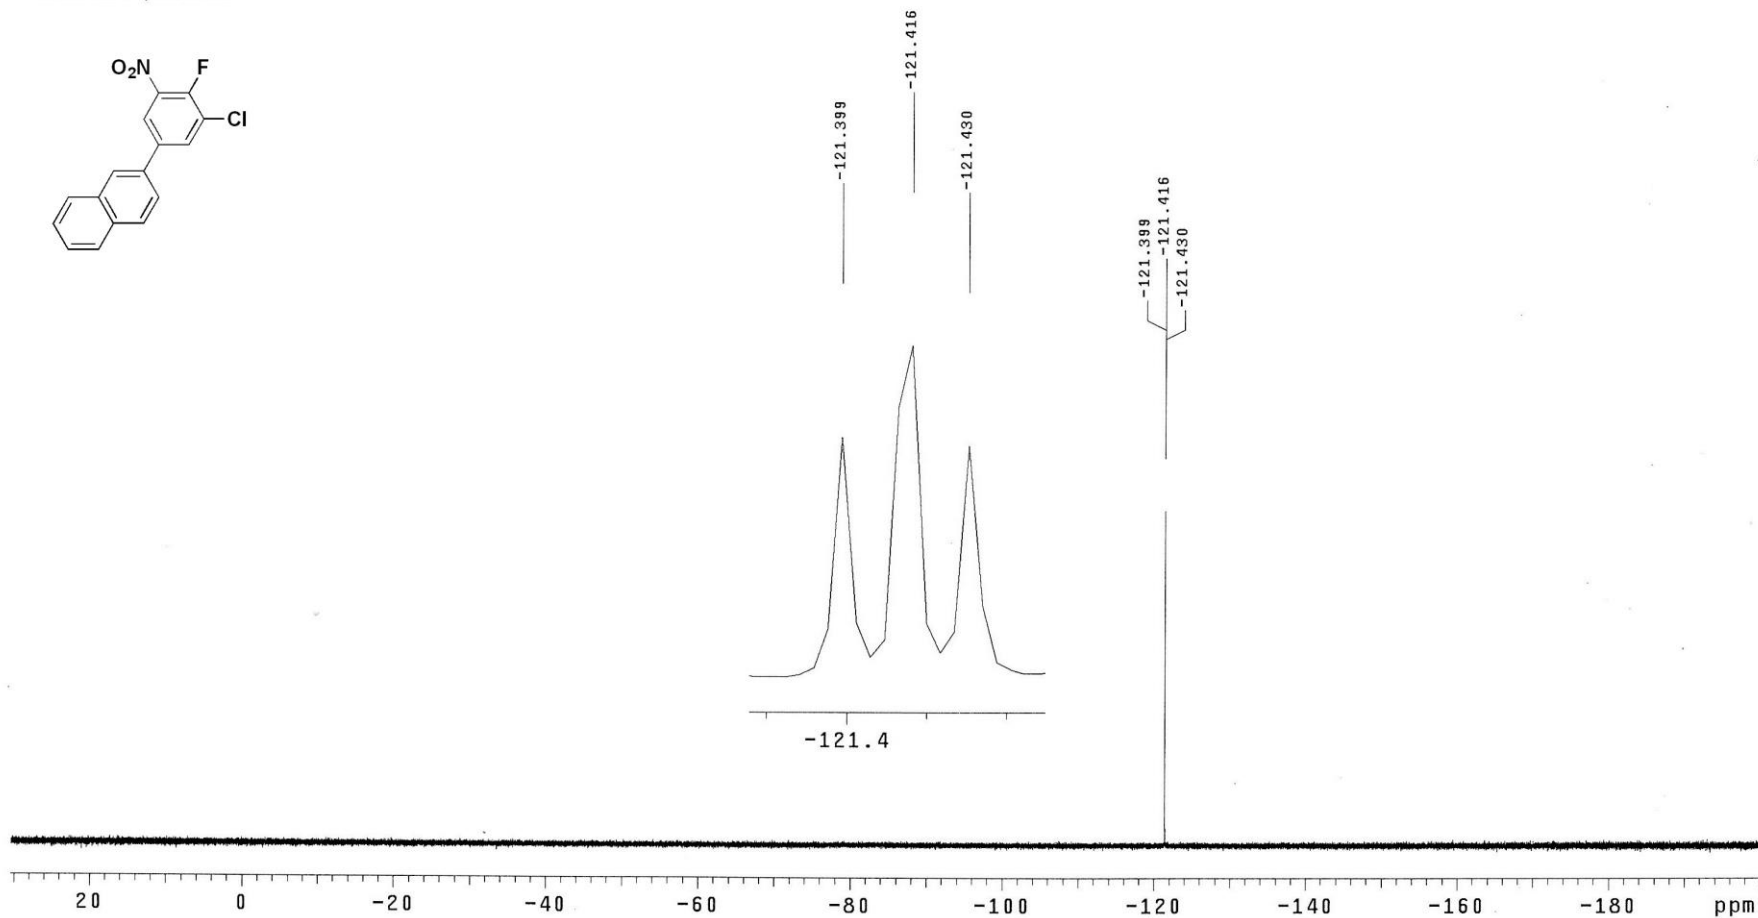

# Compound 4a (<sup>1</sup>H-NMR spectral data)

CHNF0331

Pulse Sequence: s2pu1

UNITYplus-400 "unity400"

Date: Apr 6 2023

Solvent: CDCl<sub>3</sub>

Ambient temperature

Total 32 repetitions

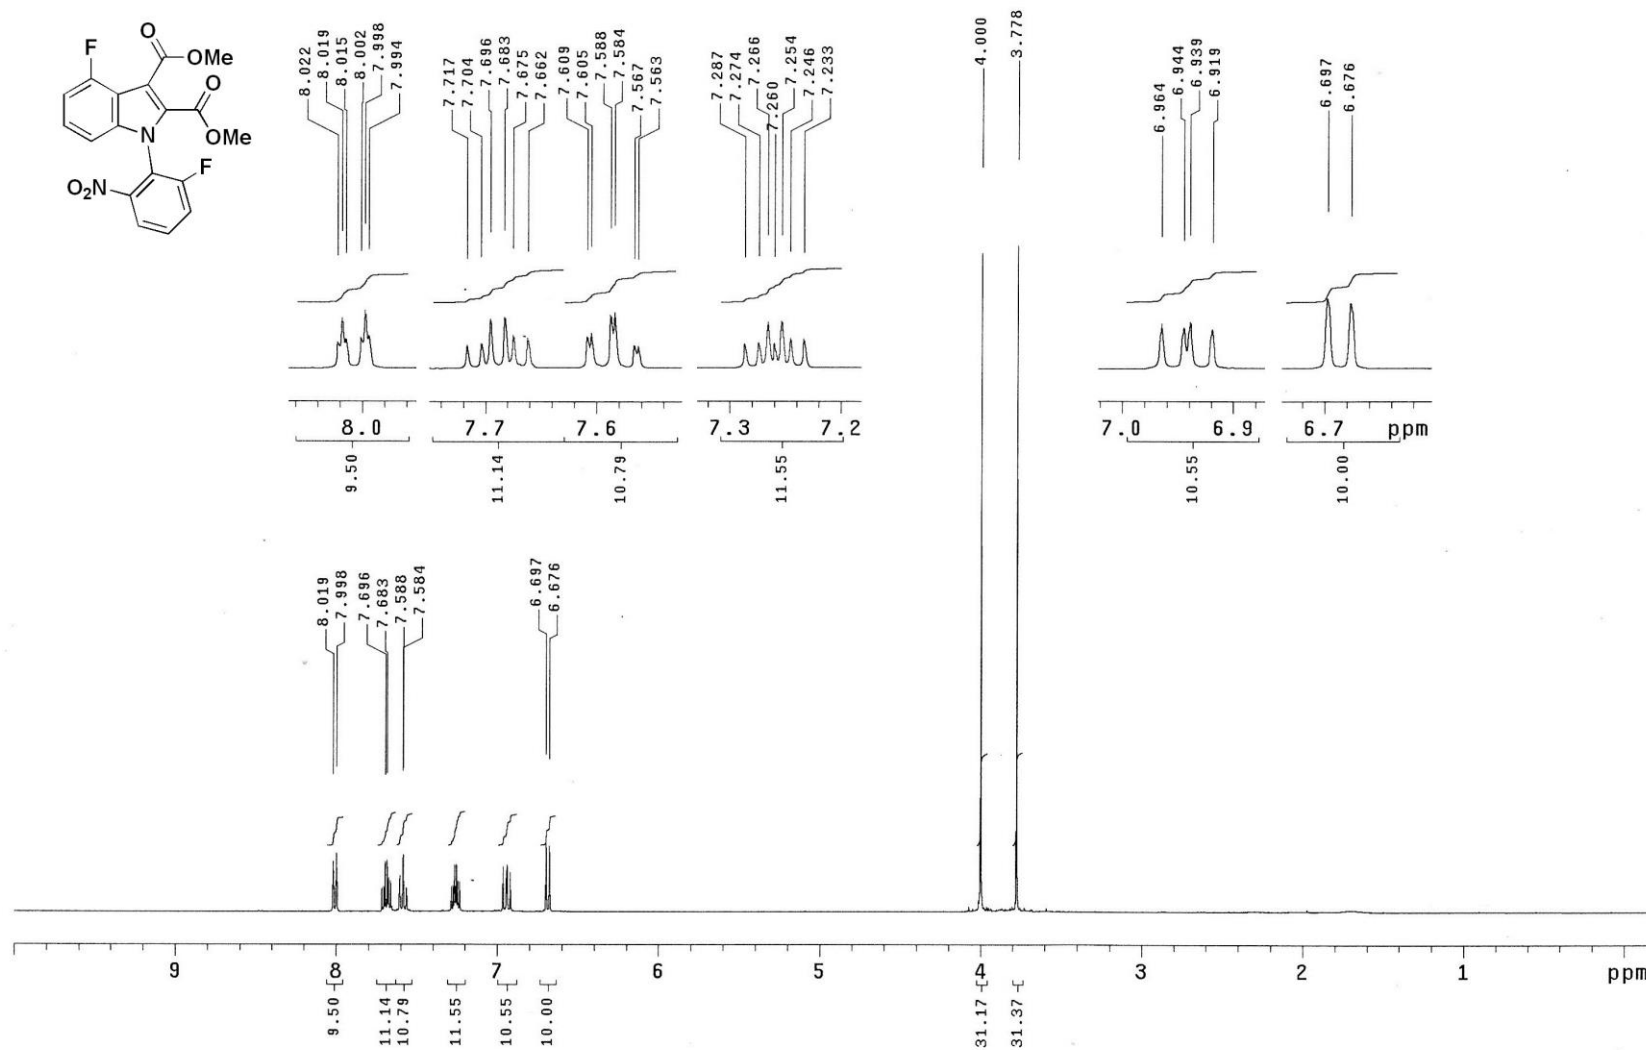

# Compound 4a (<sup>13</sup>C-NMR spectral data)

CHNF0331

Pulse Sequence: s2pu1  
 UNITYplus-400 "unity400"  
 Date: Apr 6 2023  
 Solvent: CDCl<sub>3</sub>  
 Ambient temperature  
 Total 2560 repetitions

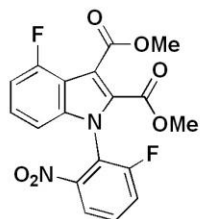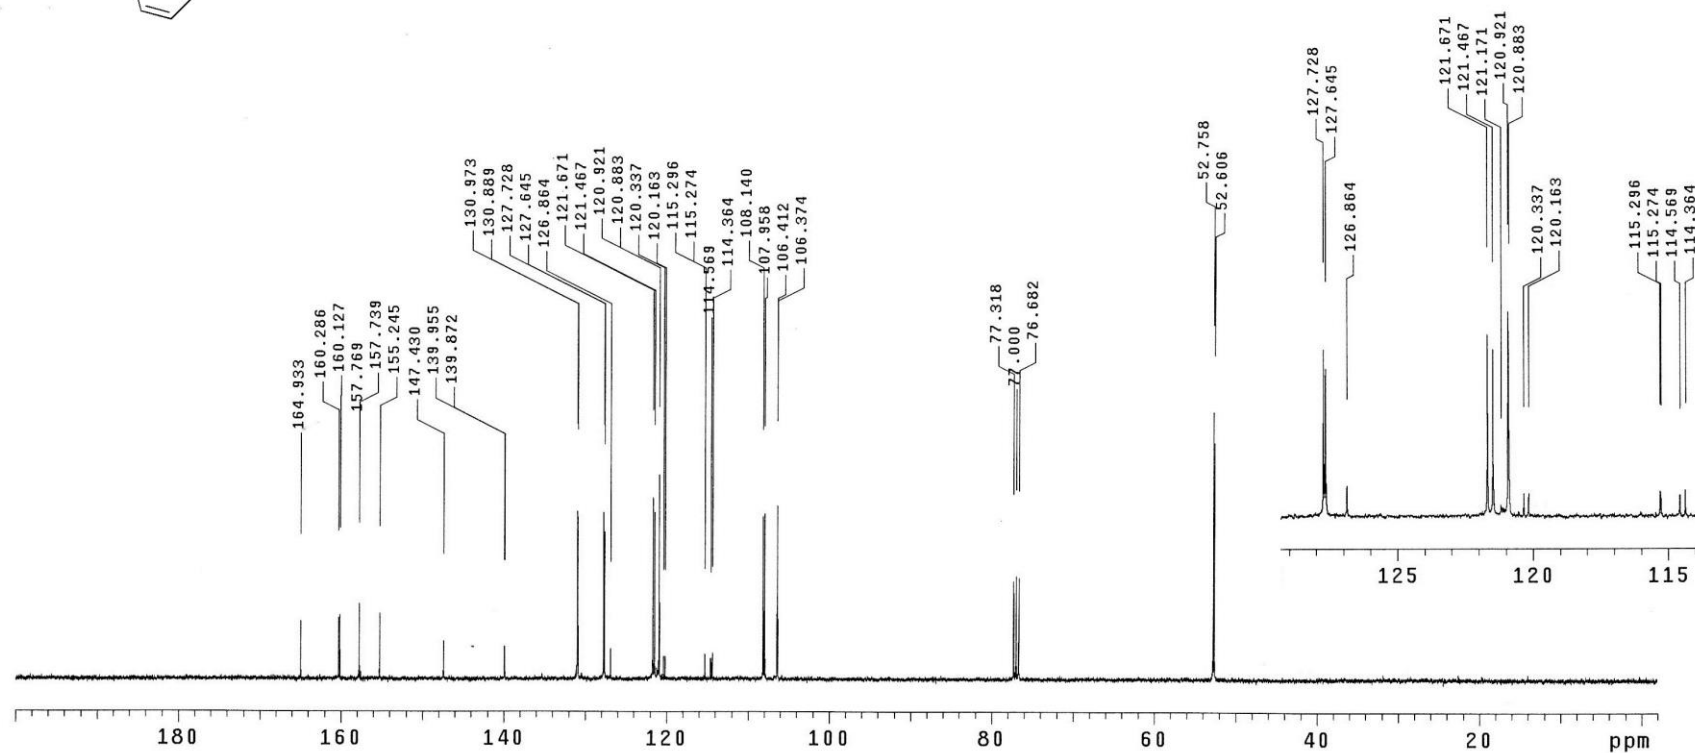

# Compound 4a (<sup>19</sup>F-NMR spectral data)

4a

Pulse Sequence: s2pu1,  
Mercury-400BB "MerPlus400"  
Date: Jan 17 2024  
Solvent: cdcl3  
Ambient temperature  
Total 96 repetitions

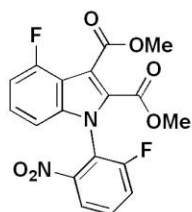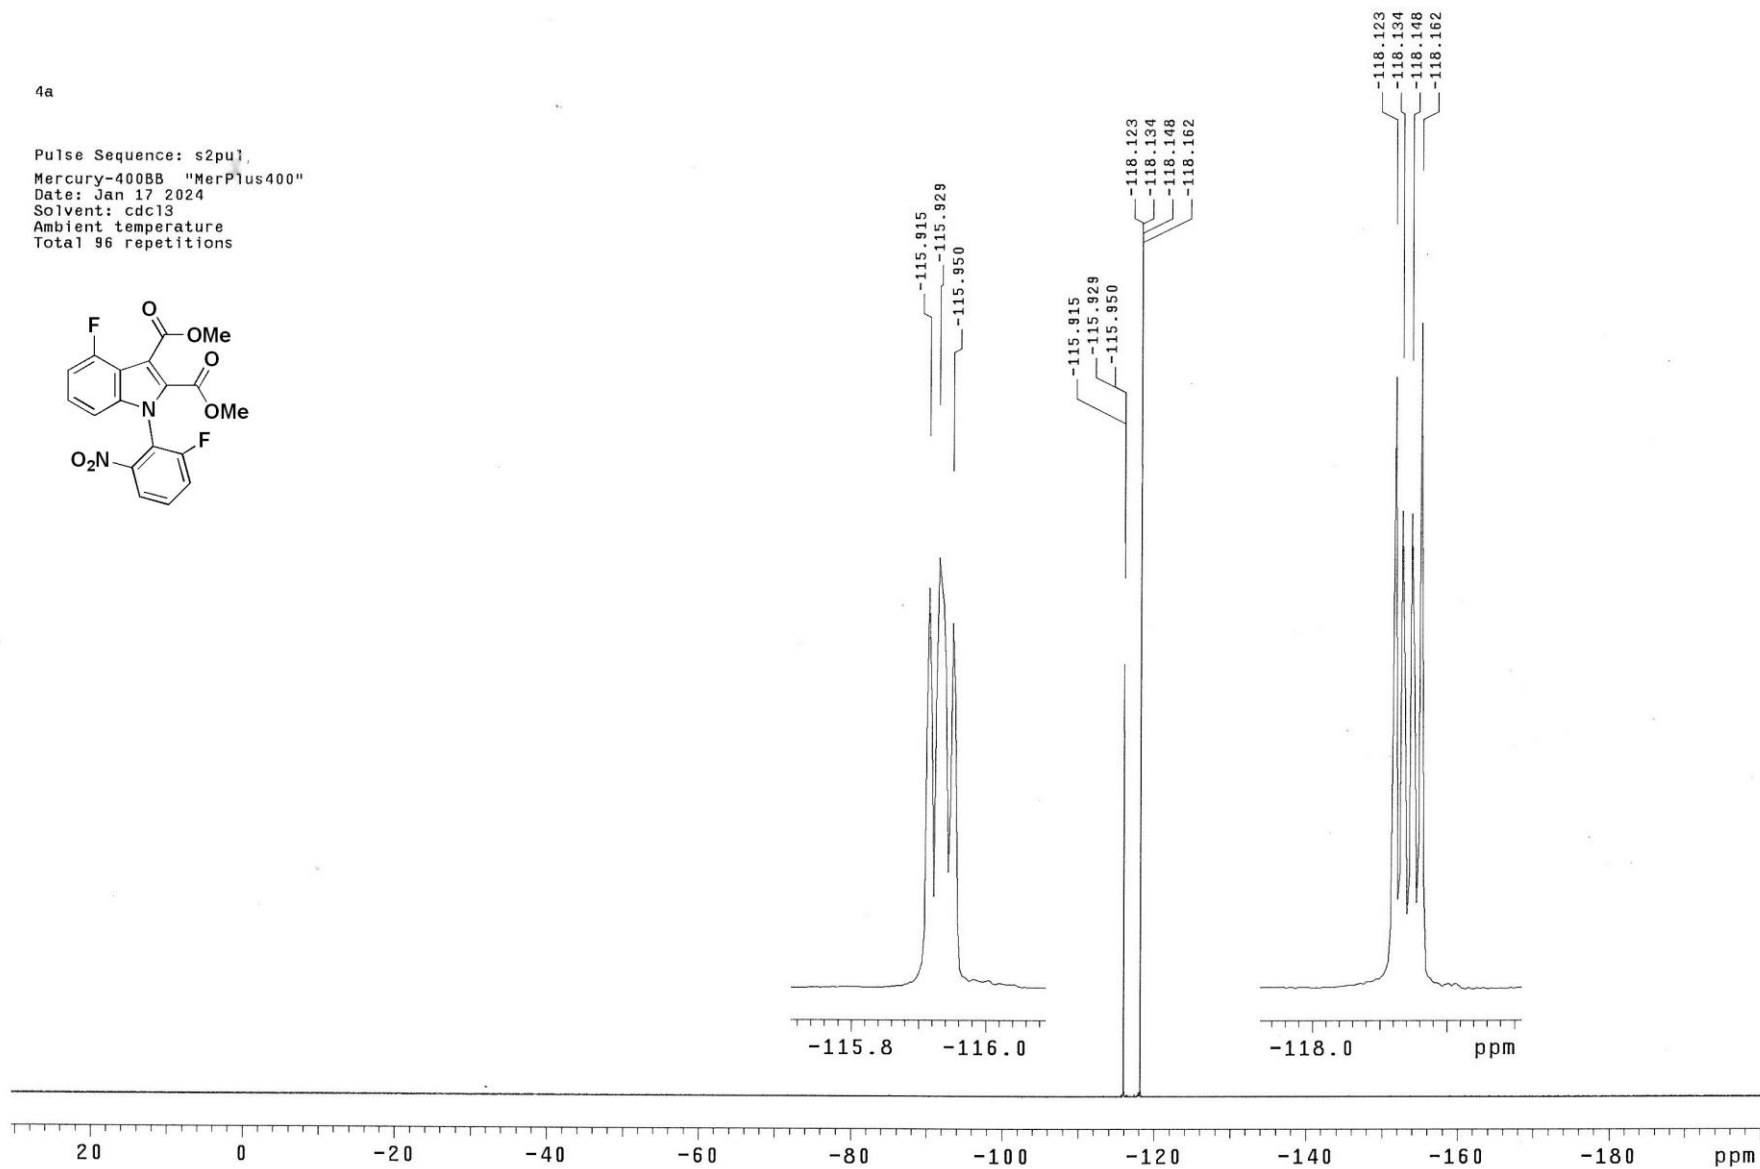

# Compound 4b (<sup>1</sup>H-NMR spectral data)

CHNF1215

Pulse Sequence: s2pu1

UNITYplus-400 "unity400"

Date: Dec 16 2022

Solvent: CDCl<sub>3</sub>

Ambient temperature

Total 32 repetitions

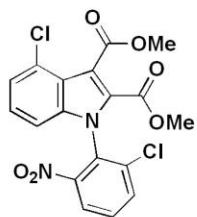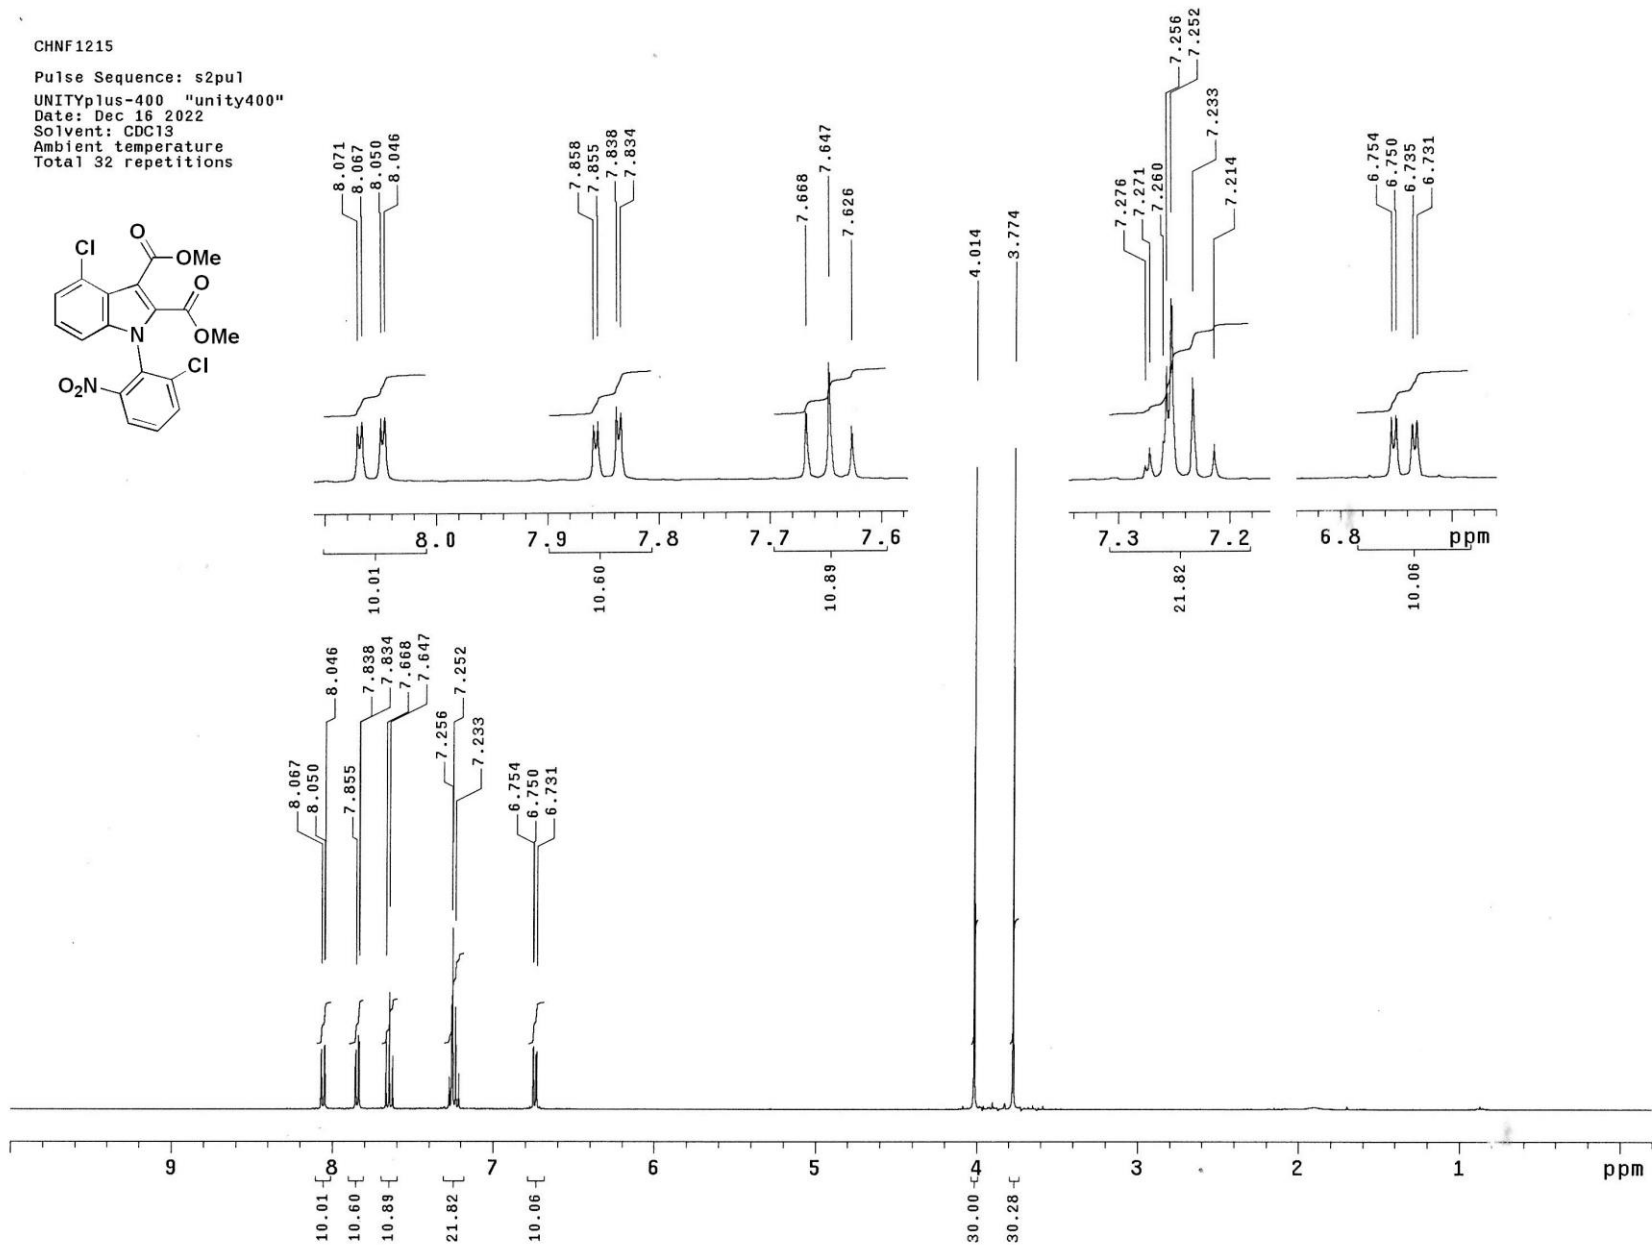

# Compound 4b (<sup>13</sup>C-NMR spectral data)

CHNF1215

Pulse Sequence: s2pu1

UNITYplus-400 "unity400"

Date: Dec 16 2022

Solvent: CDCl<sub>3</sub>

Ambient temperature

Total 640 repetitions

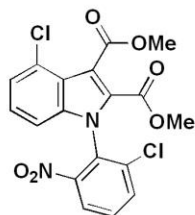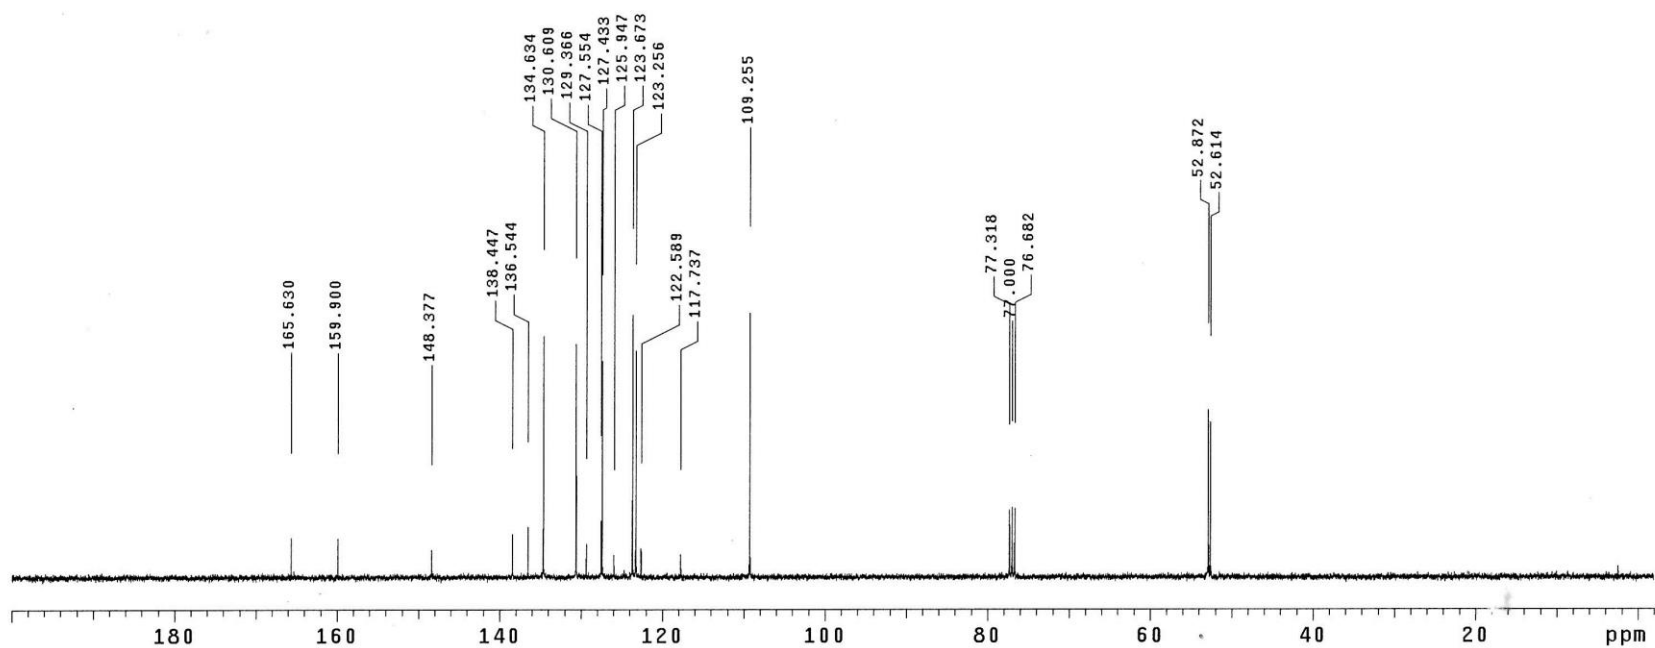

# Compound 4c (<sup>1</sup>H-NMR spectral data)

CHNF0222

Pulse Sequence: s2pu1  
 UNITYplus-400 "unity400"  
 Date: Feb 22 2023  
 Solvent: CDCl<sub>3</sub>  
 Ambient temperature  
 Total 32 repetition

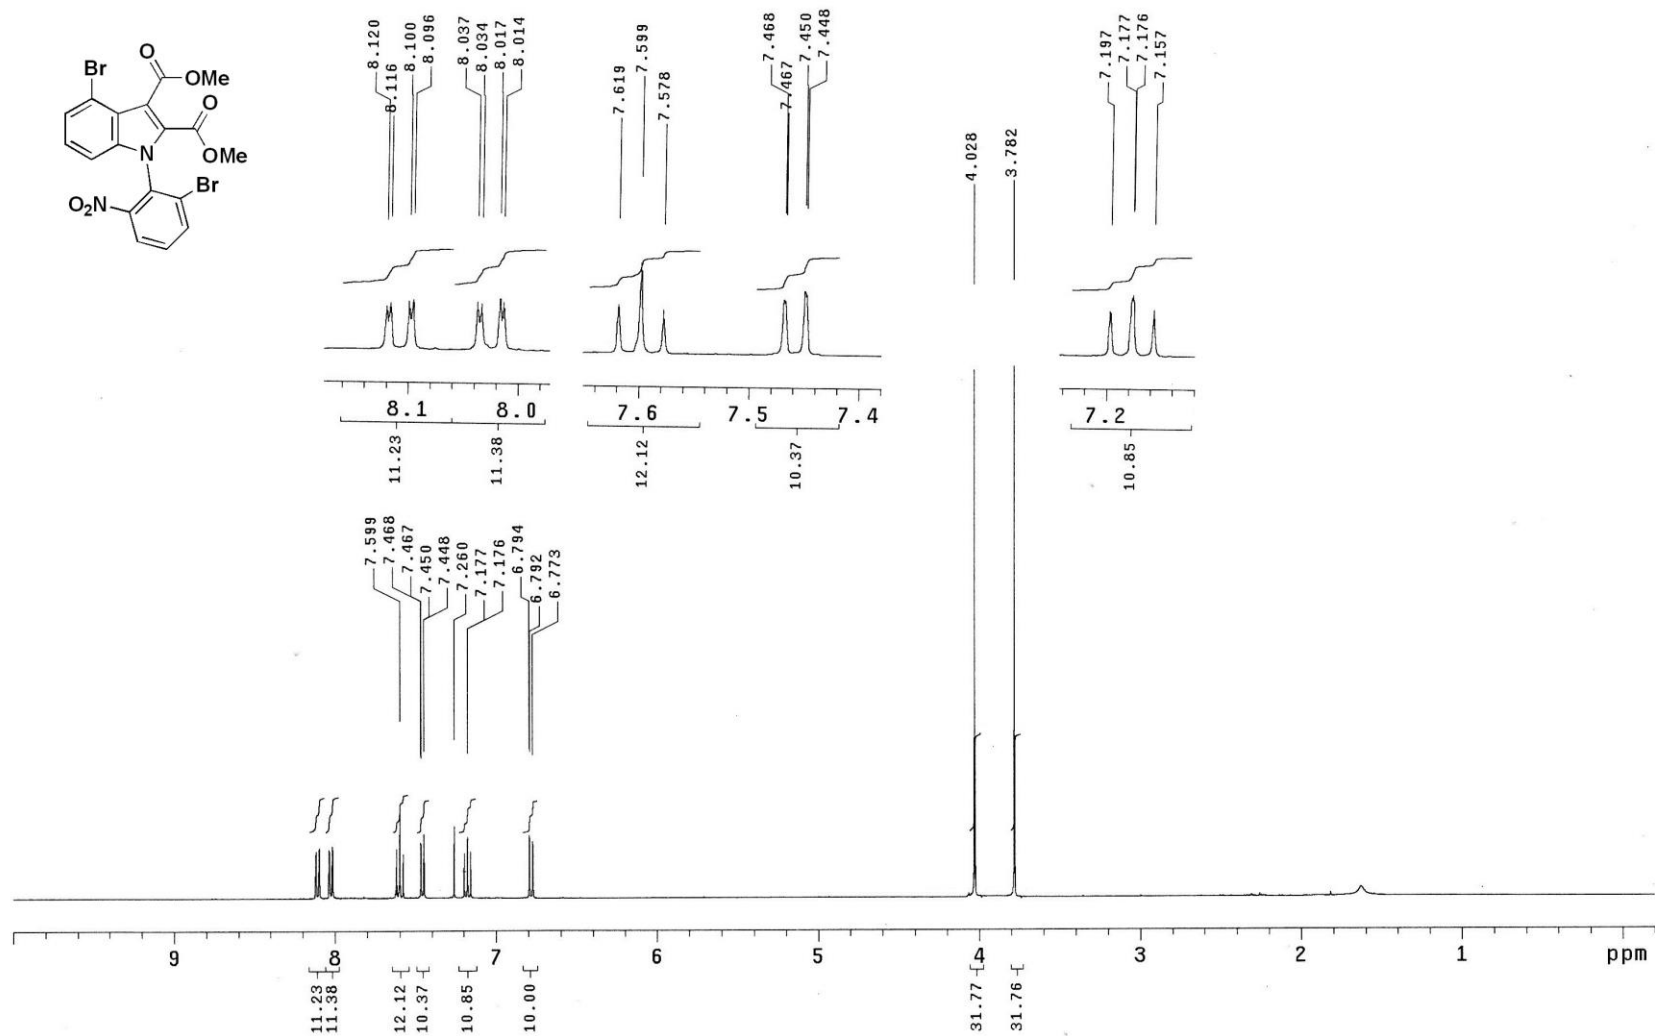

# Compound 4c (<sup>13</sup>C-NMR spectral data)

CHNF0222

Pulse Sequence: s2pu1  
 UNITYplus-400 "unity400"  
 Date: Feb 22 2023  
 Solvent: CDCl<sub>3</sub>  
 Ambient temperature  
 Total 3280 repetitions

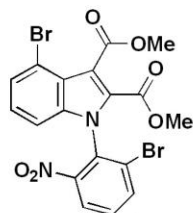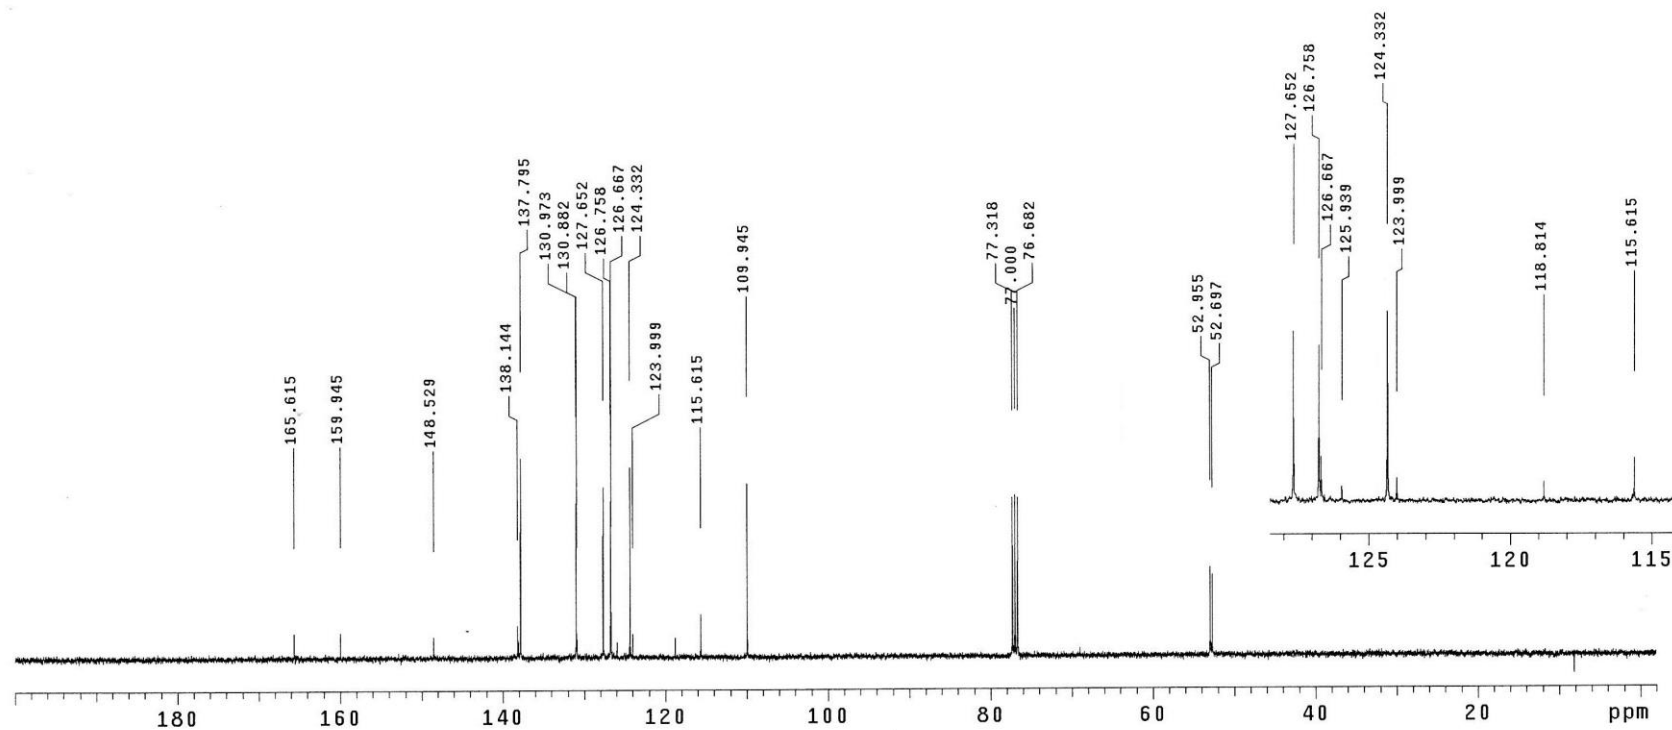



# Compound 4d (<sup>1</sup>H-NMR spectral data)

CHNF0411

Pulse Sequence: s2pu1  
 UNITYplus-400 "unity400"  
 Date: Apr 11 2023  
 Solvent: CDCl<sub>3</sub>  
 Ambient temperature  
 Total 32 repetitions

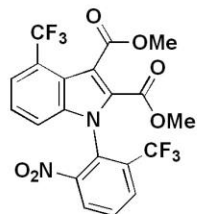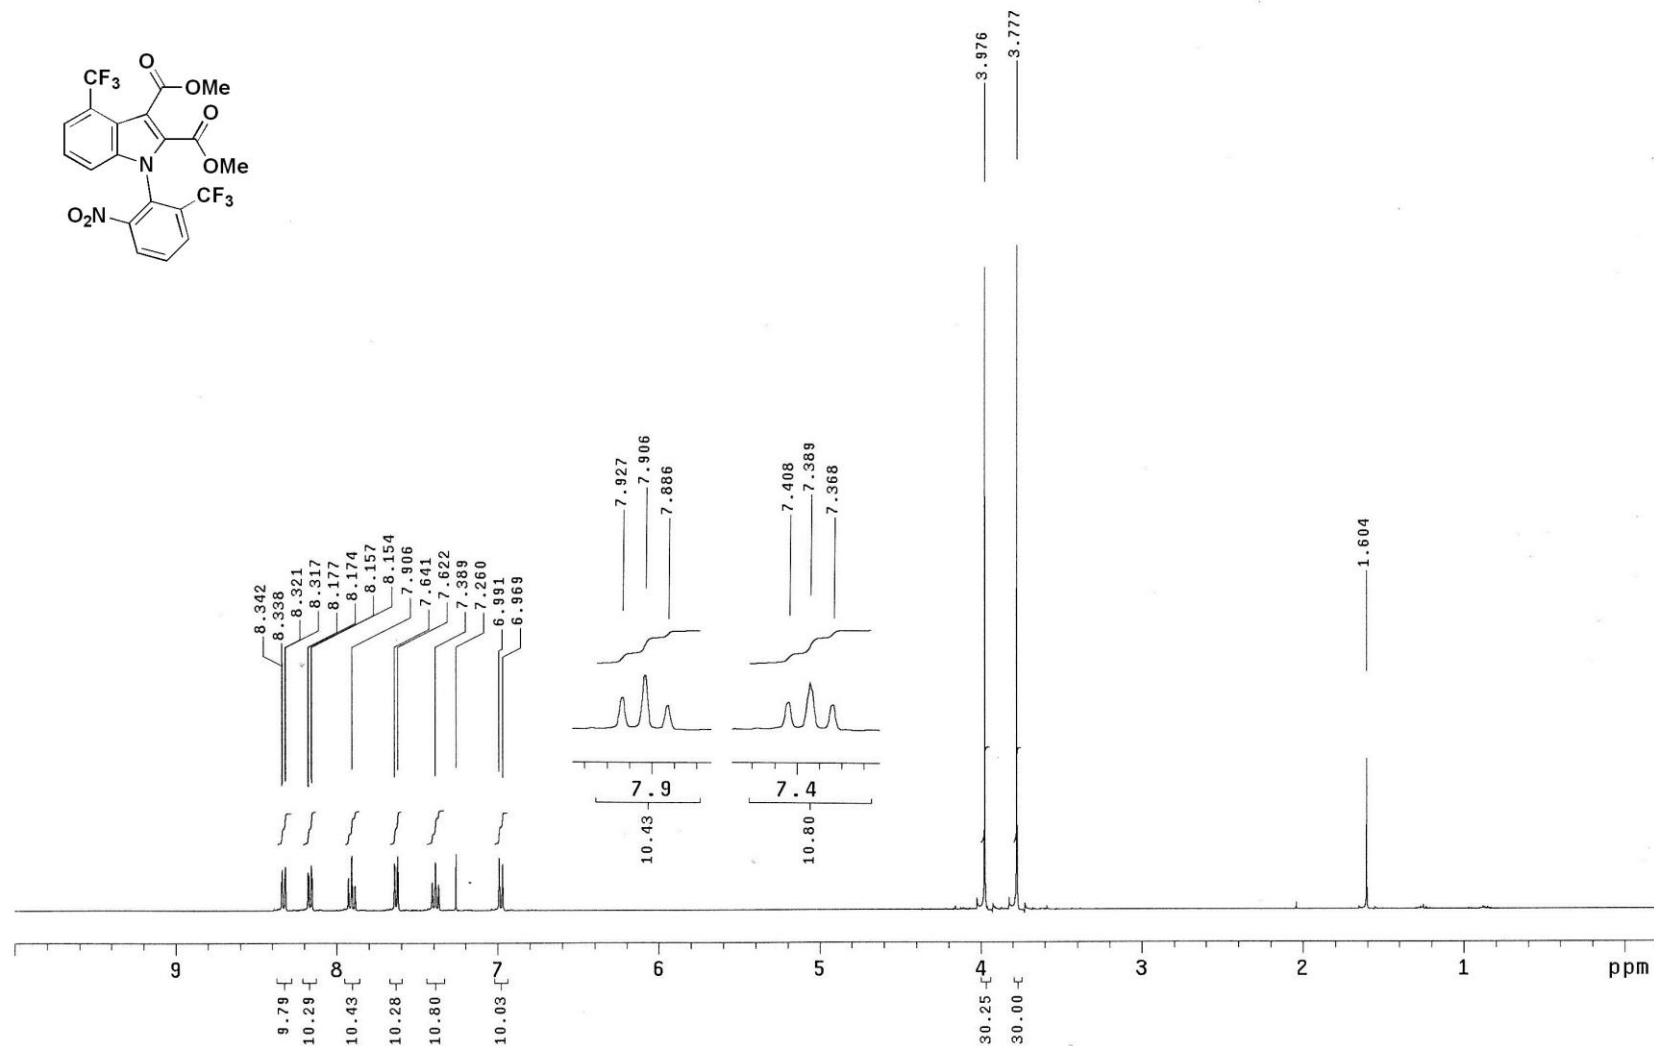

# Compound 4d (<sup>13</sup>C-NMR spectral data)

CHNF0411

Pulse Sequence: s2pu1

UNITYplus-400 "unity400"

Date: Apr 11 2023

Solvent: CDCl<sub>3</sub>

Ambient temperature

Total 3264 repetitions

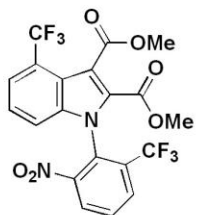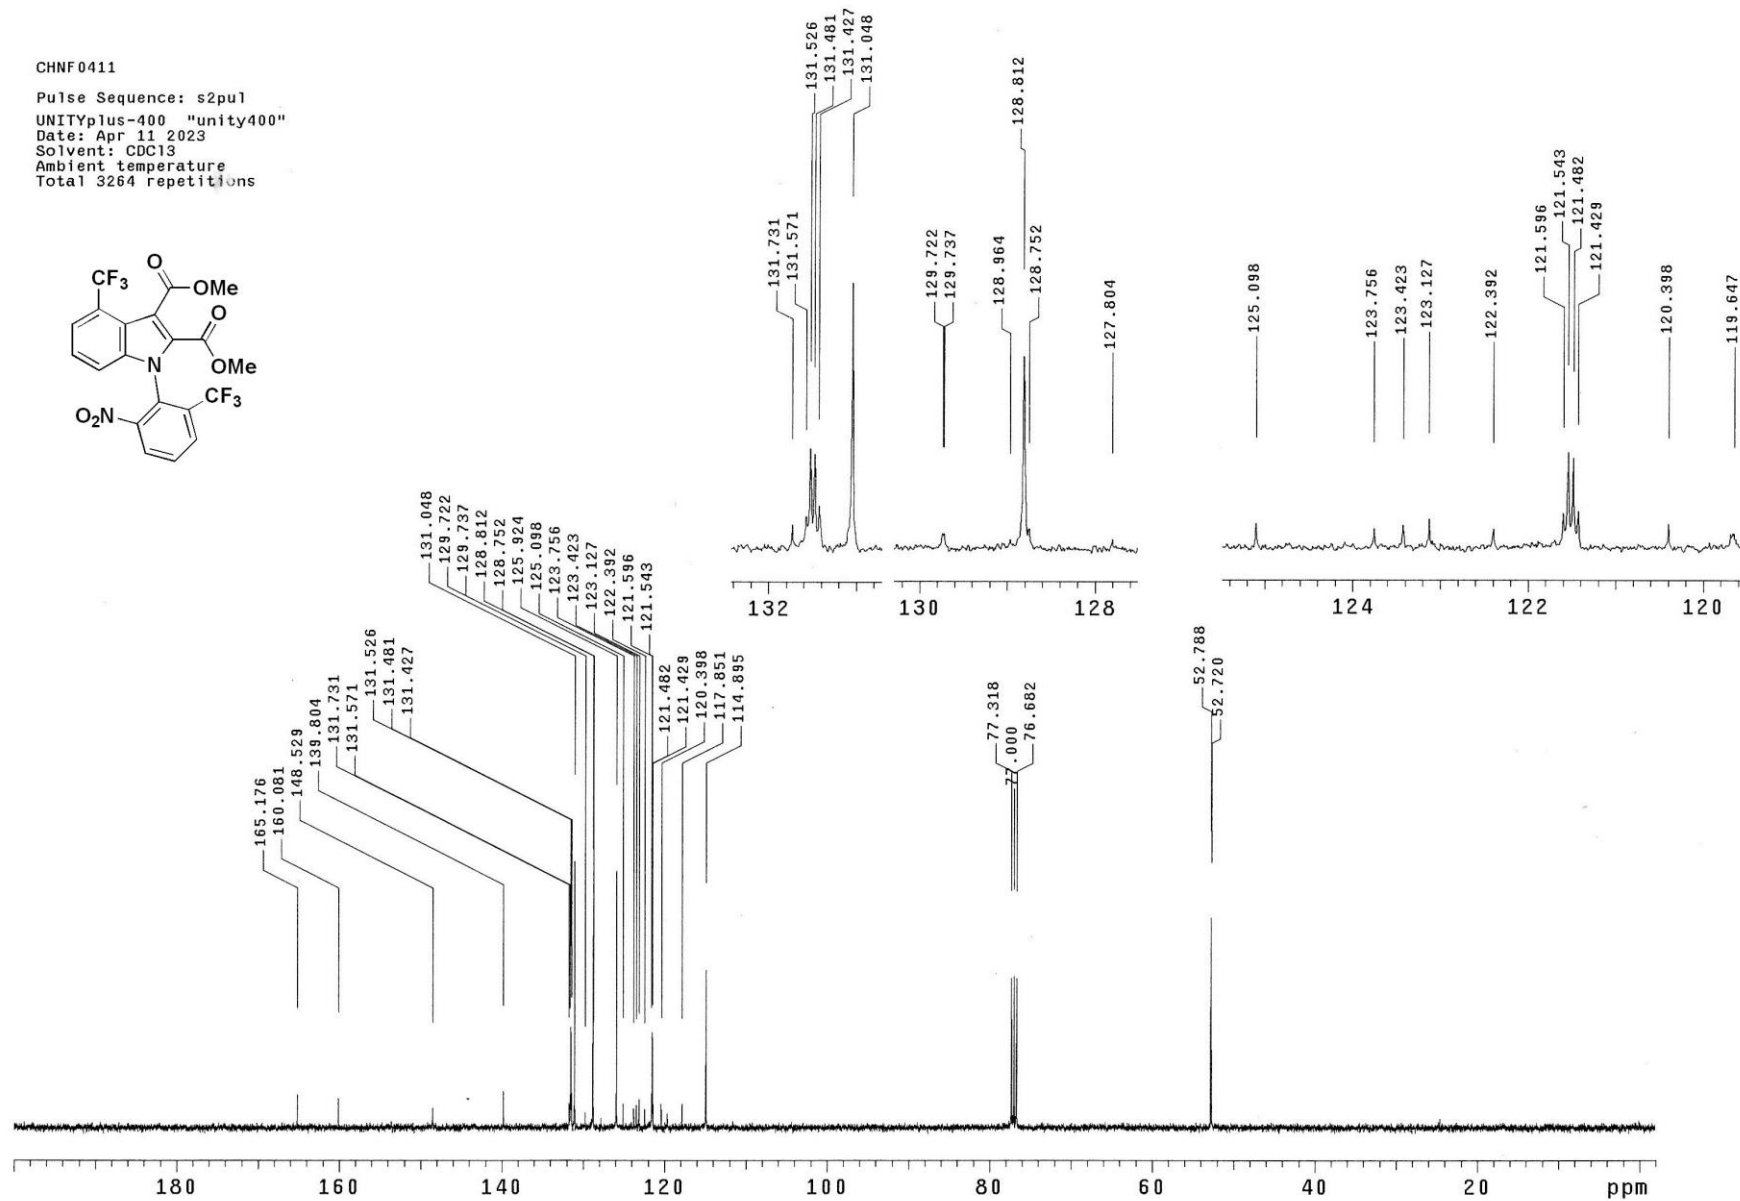

# Compound 4d (<sup>19</sup>F-NMR spectral data)

4d

Pulse Sequence: s2pu1  
Mercury-400BB "MerPlus400"  
Date: Jan 18 2024  
Solvent: cdcl3  
Ambient temperature  
Total 64 repetitions

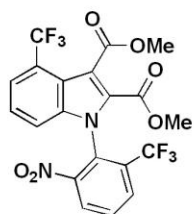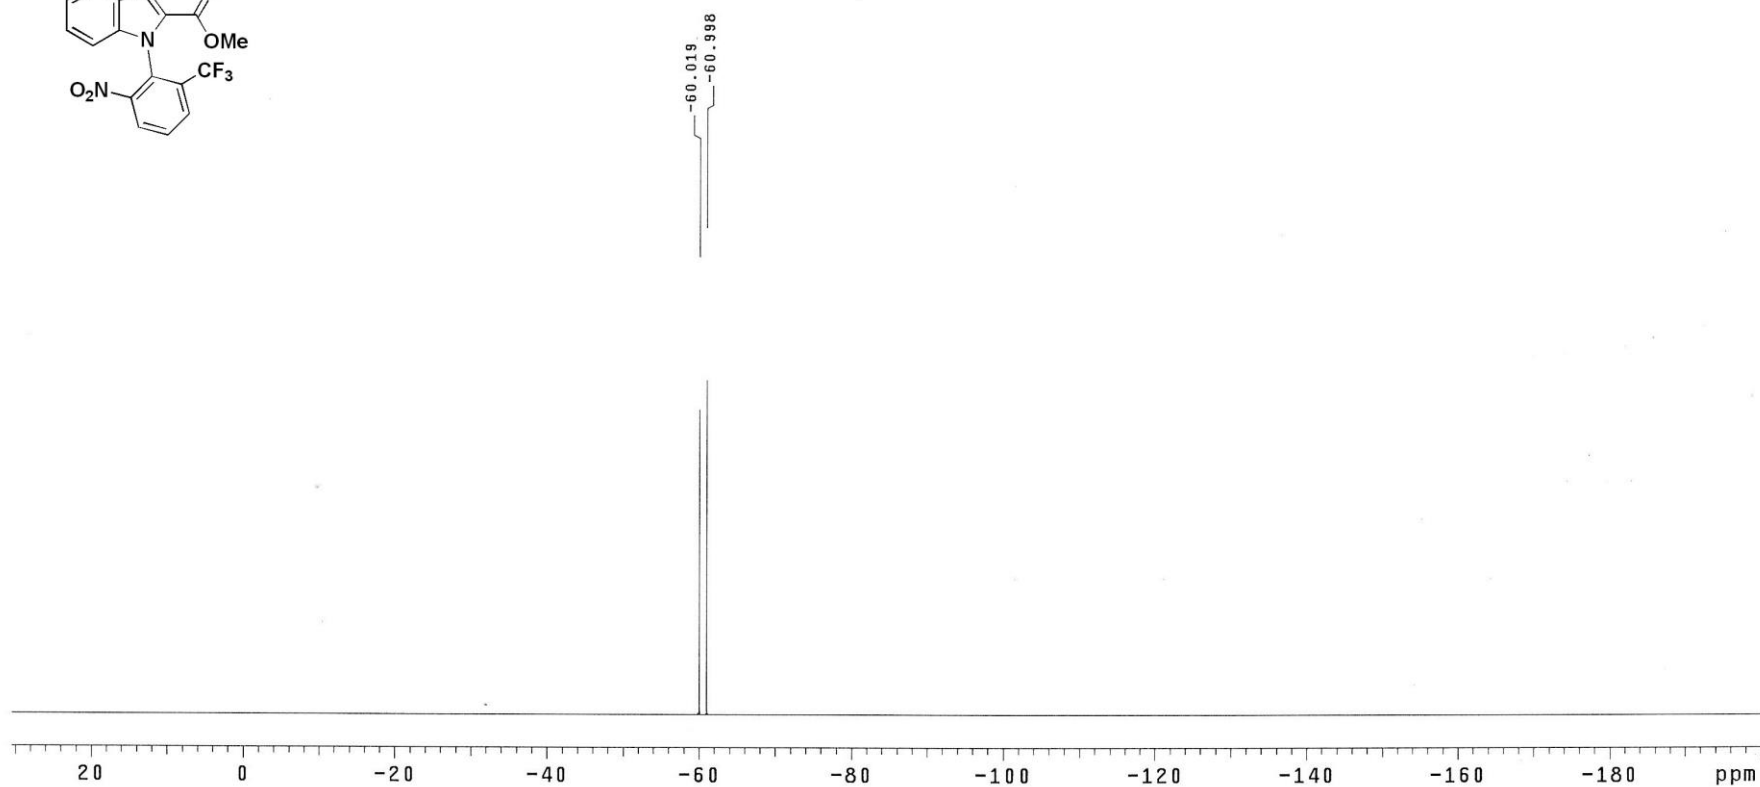

# Compound 4e (<sup>1</sup>H-NMR spectral data)

CHNF0406

Pulse Sequence: s2pu1

UNITYplus-400 "unity400"

Date: Apr 11 2023

Solvent: CDCl<sub>3</sub>

Ambient temperature

Total 32 repetitions

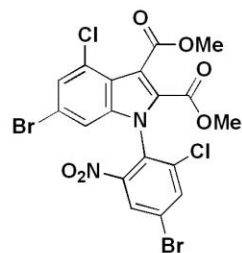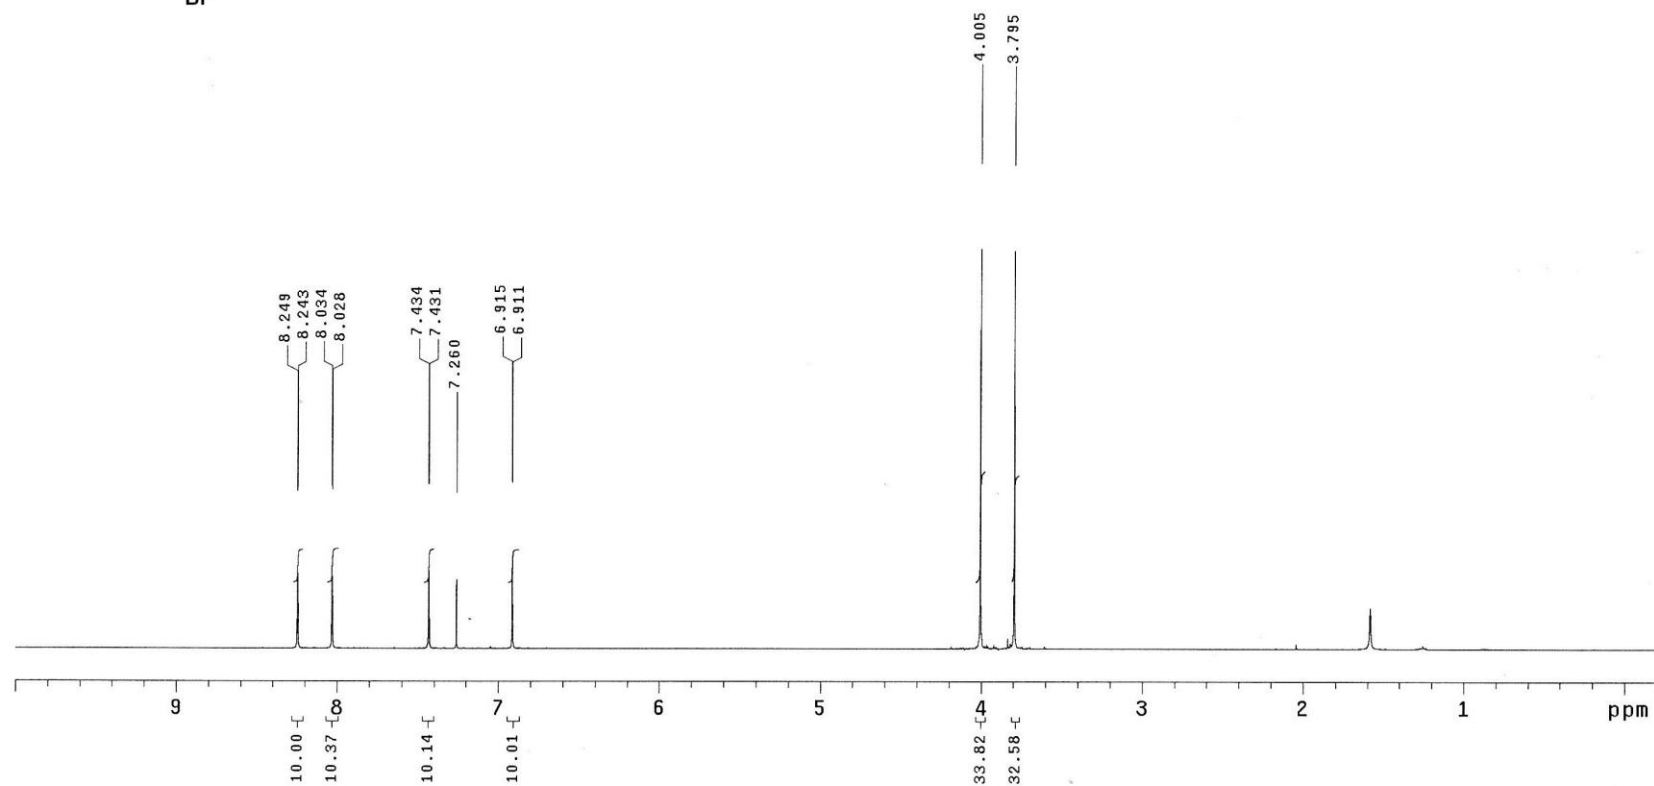

# Compound 4e (<sup>13</sup>C-NMR spectral data)

CHNF0406

Pulse Sequence: s2pu1

UNITYplus-400 "unity400"

Date: Apr 11 2023

Solvent: CDCl<sub>3</sub>

Ambient temperature

Total 4016 repetitions

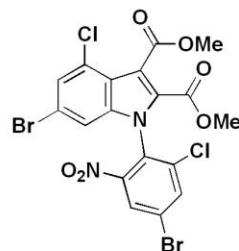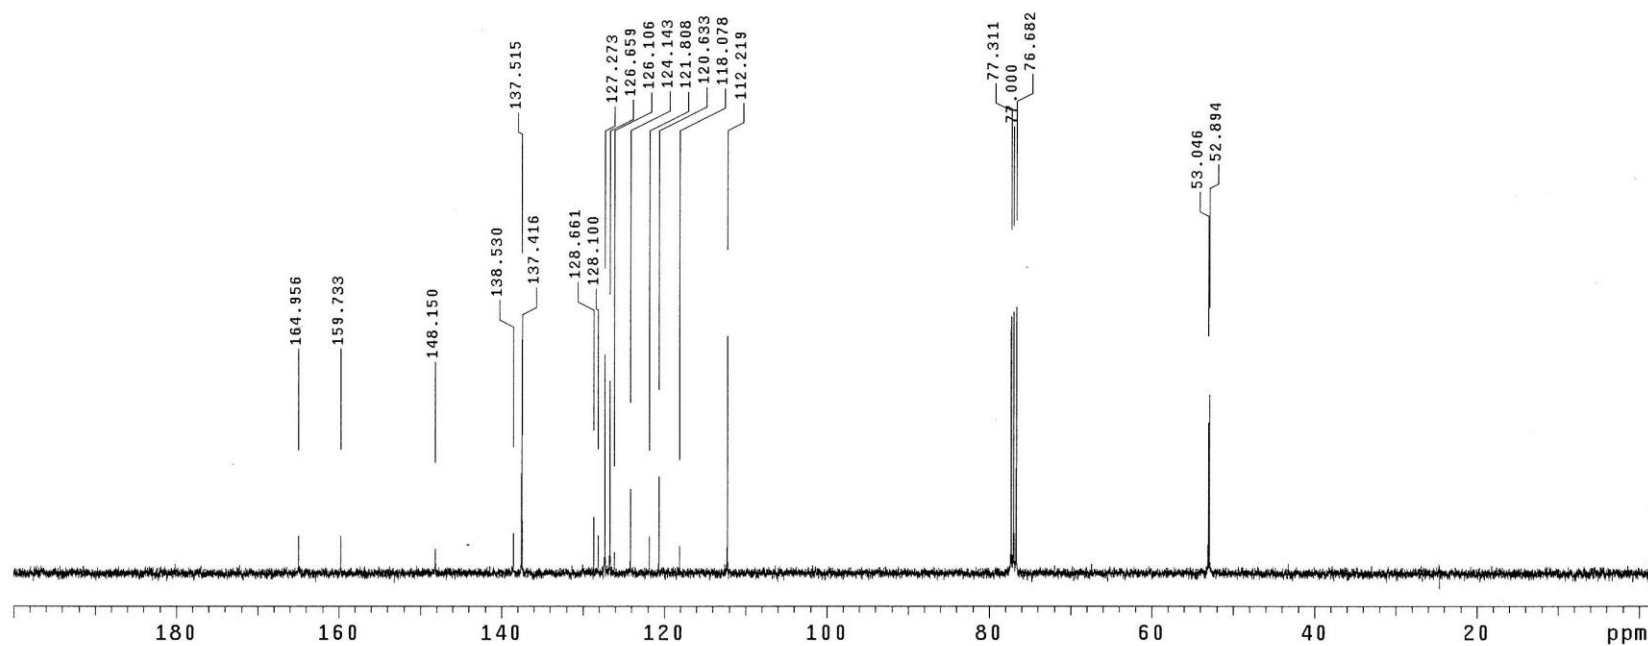

# Compound 4f (<sup>1</sup>H-NMR spectral data)

CHNF0316

Pulse Sequence: s2pul  
 UNITYplus-400 "unity400"  
 Date: Mar 17 2023  
 Solvent: CDCl<sub>3</sub>  
 Ambient temperature  
 Total 32 repetitions

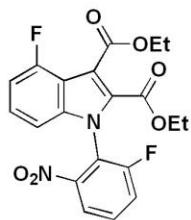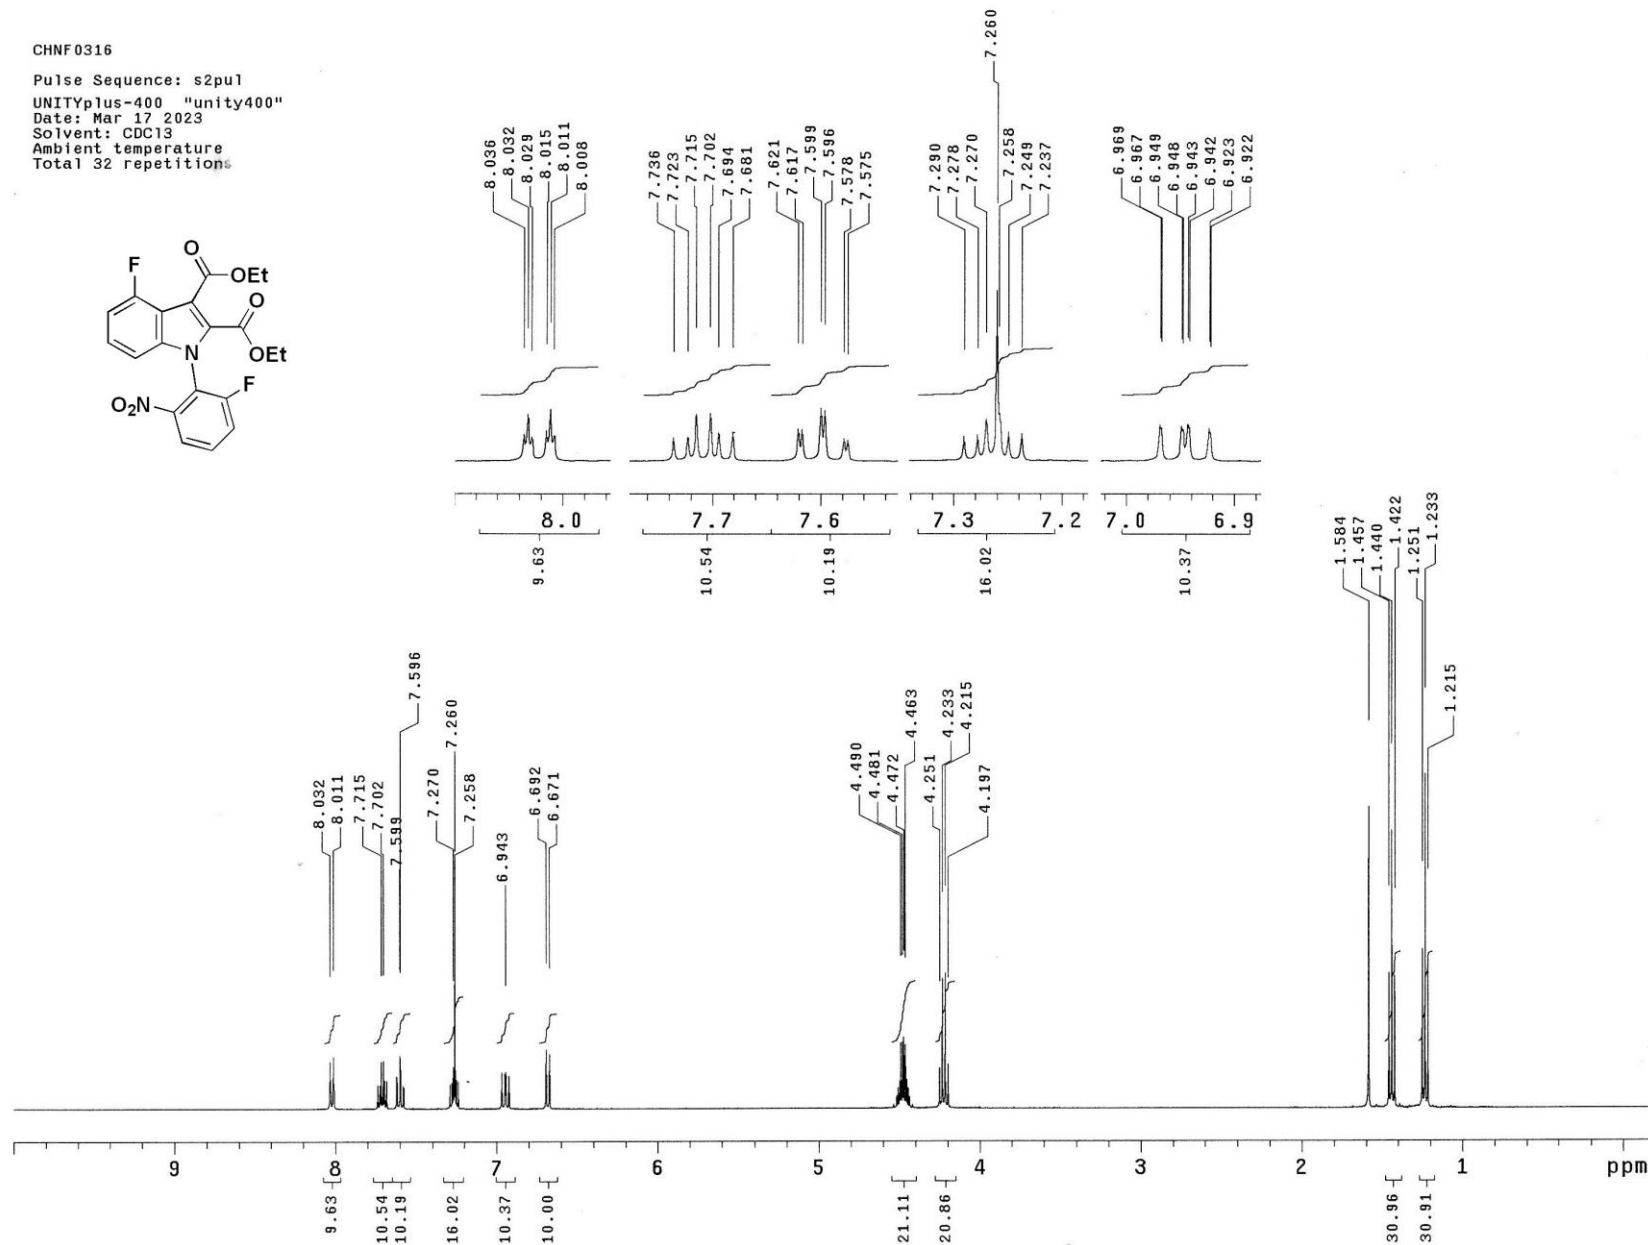

# Compound 4f (<sup>13</sup>C-NMR spectral data)

CHNF0316

Pulse Sequence: s2pu1

UNITYplus-400 "unity400"

Date: Mar 17 2023

Solvent: CDCl<sub>3</sub>

Ambient temperature

Total 4064 repetitions

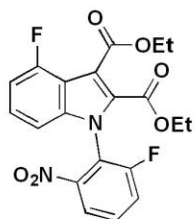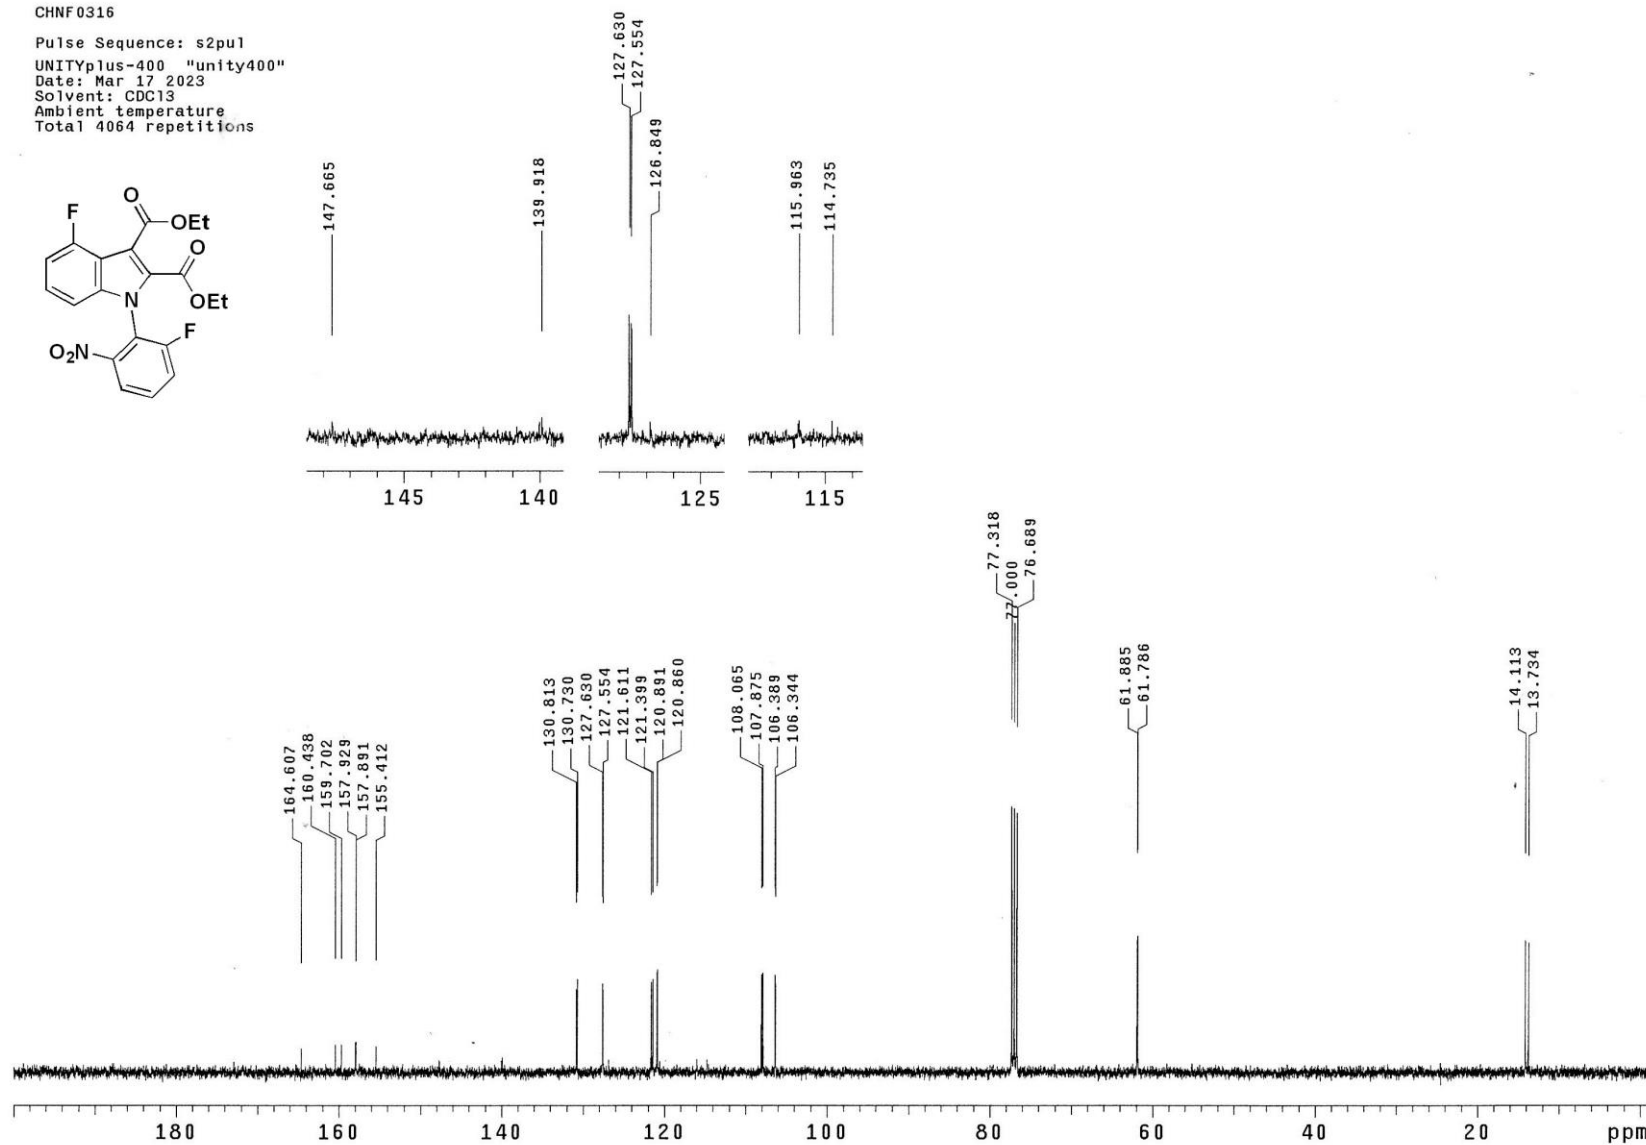

# Compound 4f (<sup>19</sup>F-NMR spectral data)

4f

Pulse Sequence: s2pu]  
Mercury-400BB "MerPlus400"  
Date: Jan 17 2024  
Solvent: cdcl3  
Ambient temperature  
Total 96 repetitions

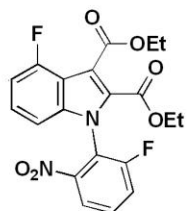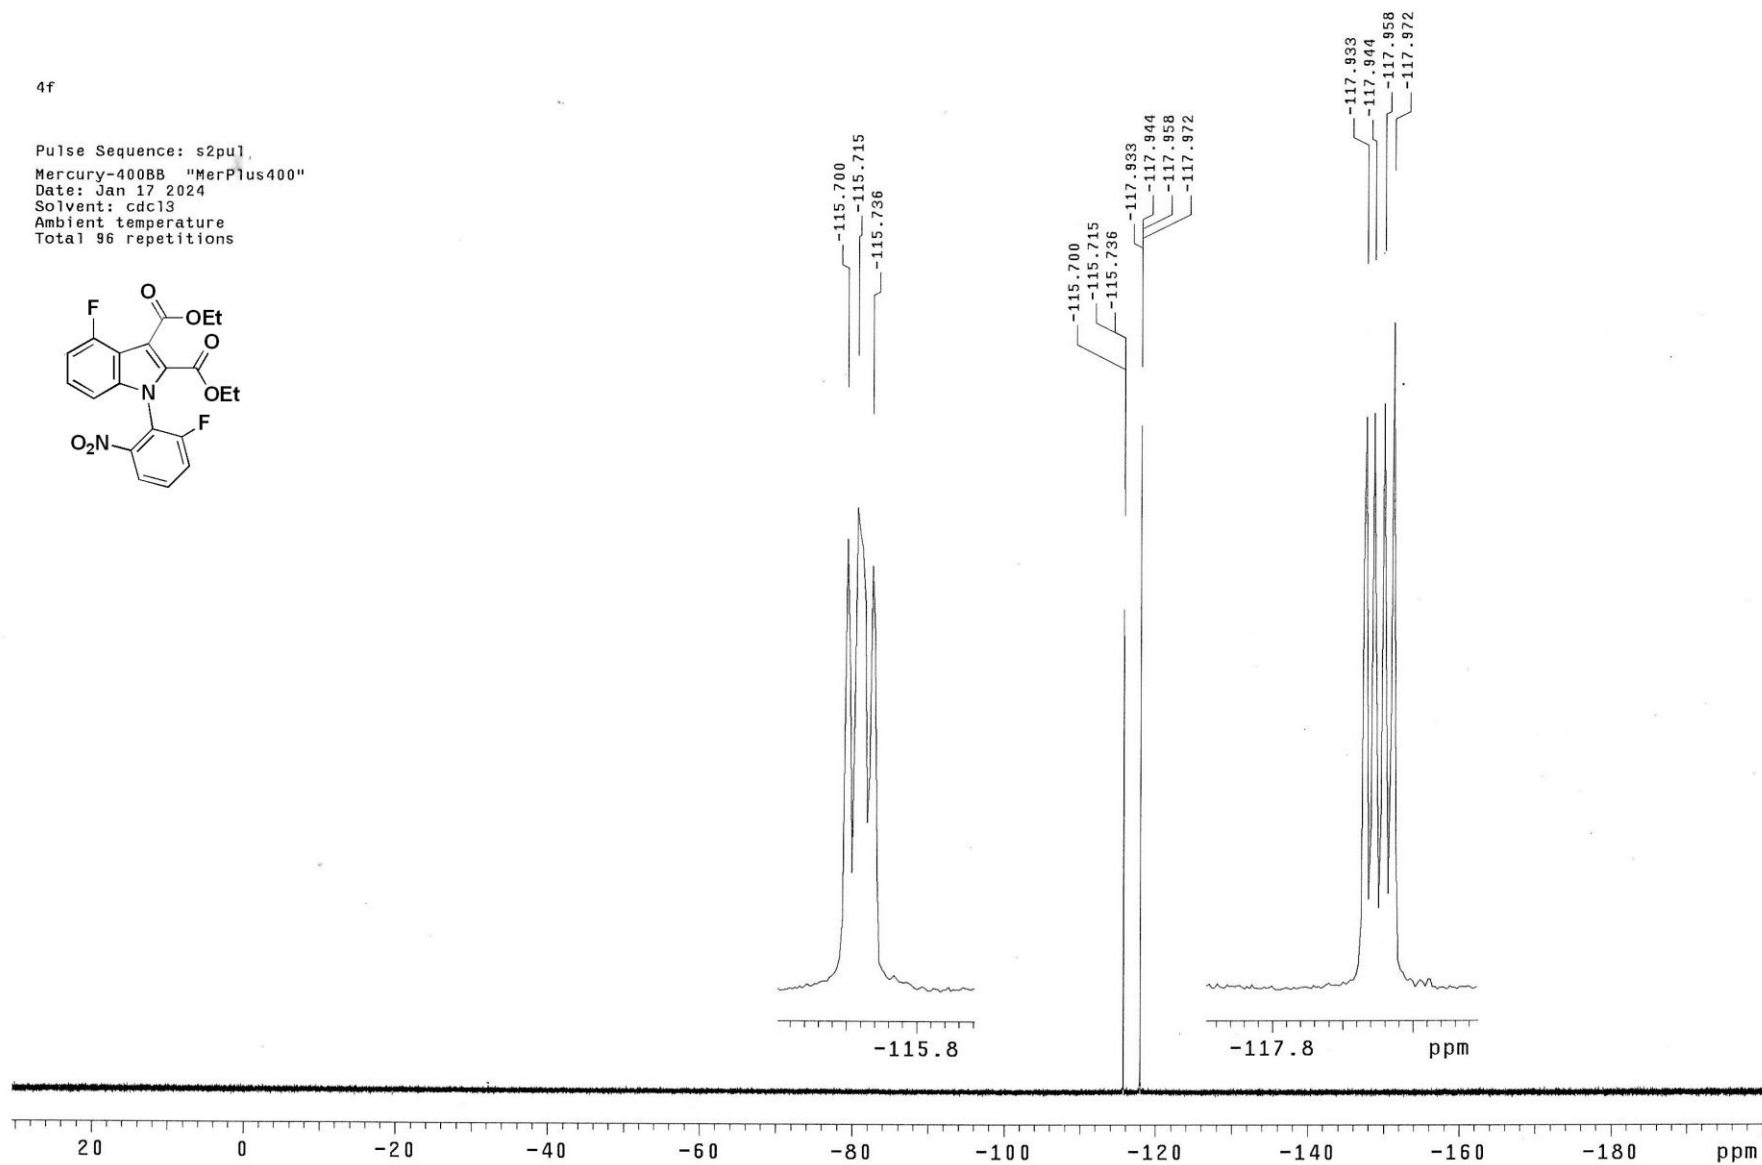



# Compound 4g (<sup>1</sup>H-NMR spectral data)

CHQ3739

Pulse Sequence: s2pu1  
 UNITYplus-400 "unity400"  
 Date: Nov 2 2022  
 Solvent: CDCl<sub>3</sub>  
 Ambient temperature  
 Total 32 repetitions

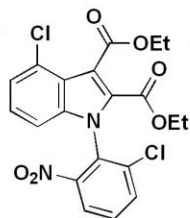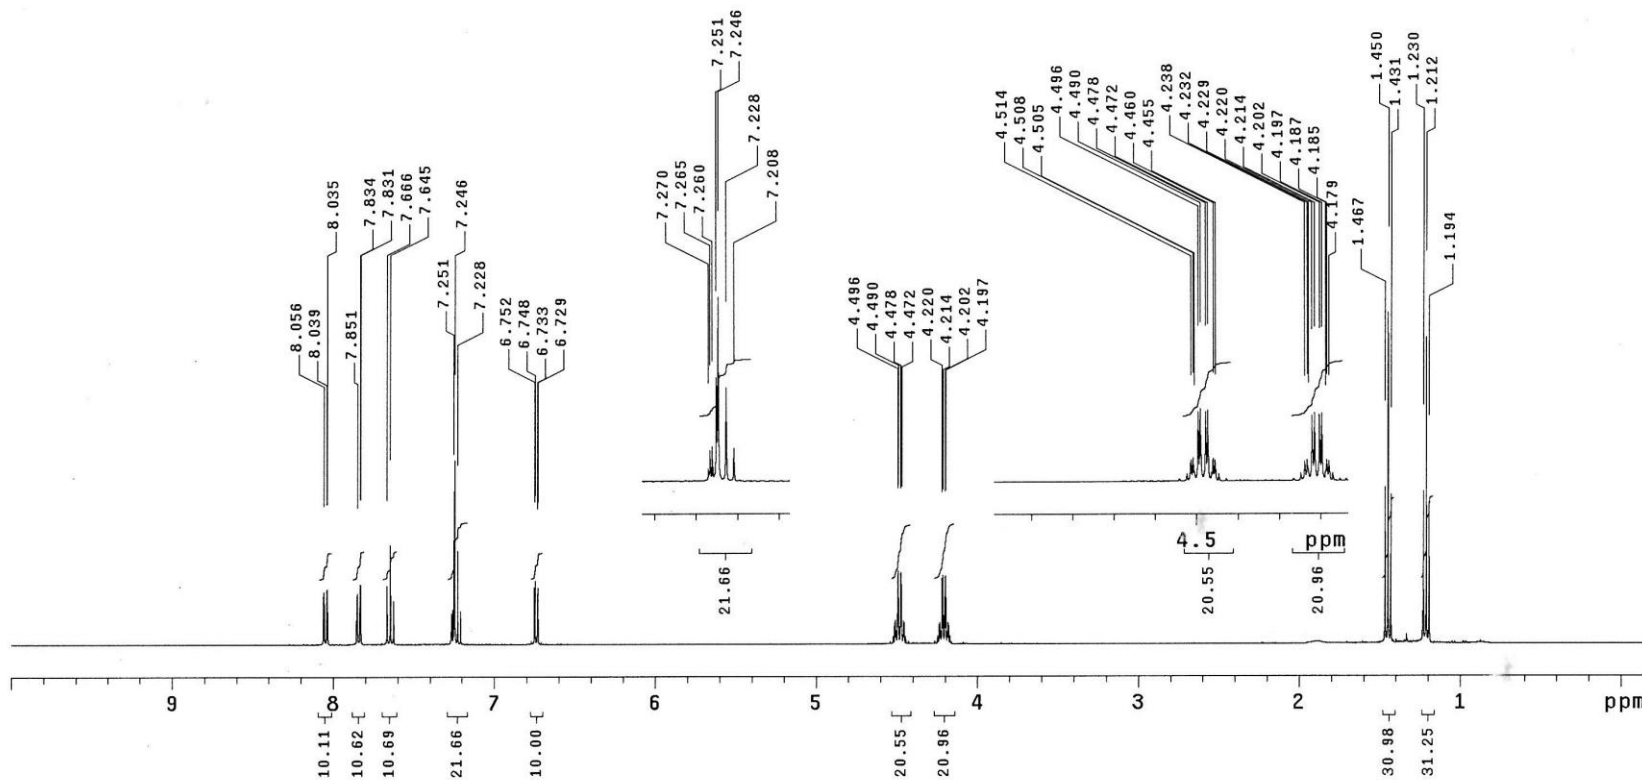

# Compound 4g (<sup>13</sup>C-NMR spectral data)

CHQ3739

Pulse Sequence: s2pu1

UNITYplus-400 "unity400"

Date: Nov 2 2022

Solvent: CDCl<sub>3</sub>

Ambient temperature

Total 656 repetitions

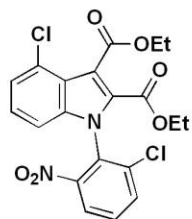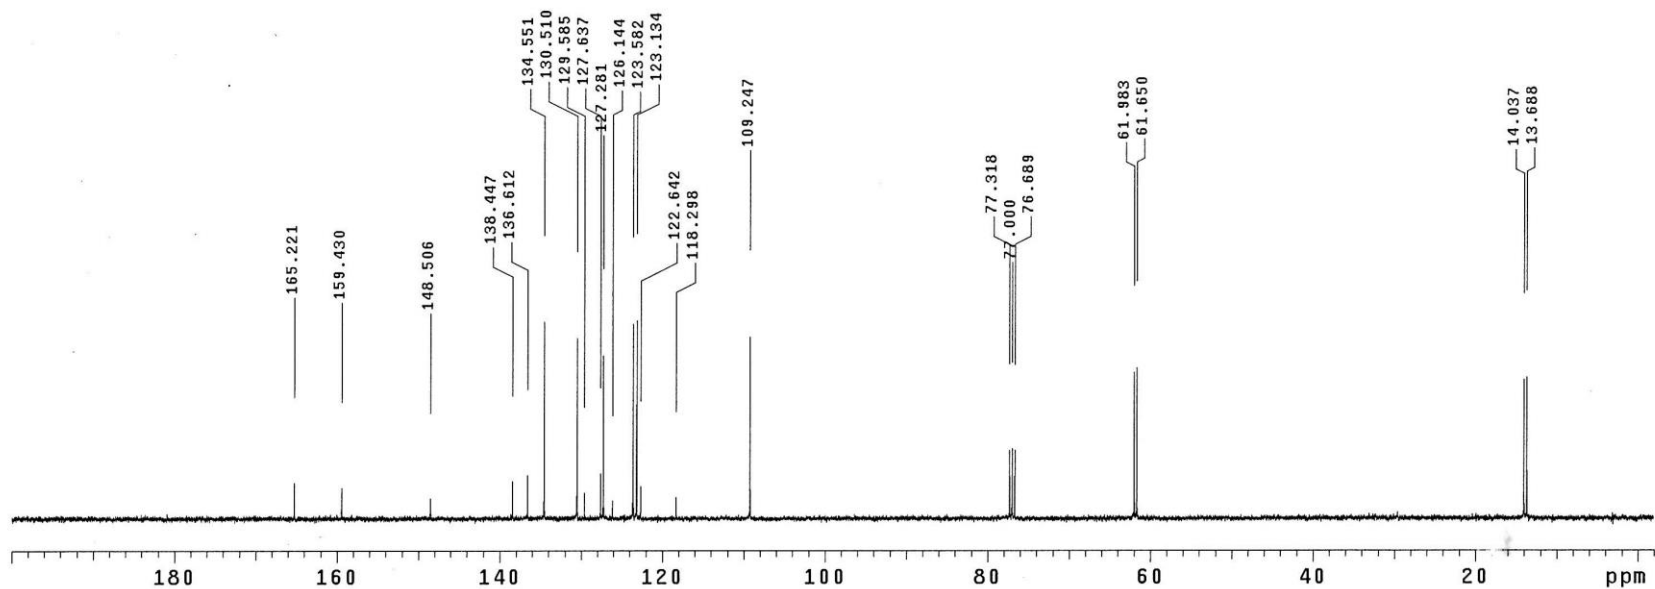

# Compound 4h (<sup>1</sup>H-NMR spectral data)

CHNF0210

Pulse Sequence: s2pu1

UNITYplus-400 "unity400"

Date: Feb 13 2023

Solvent: CDCl<sub>3</sub>

Ambient temperature

Total 32 repetitions

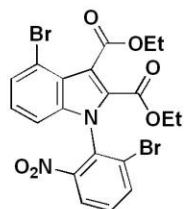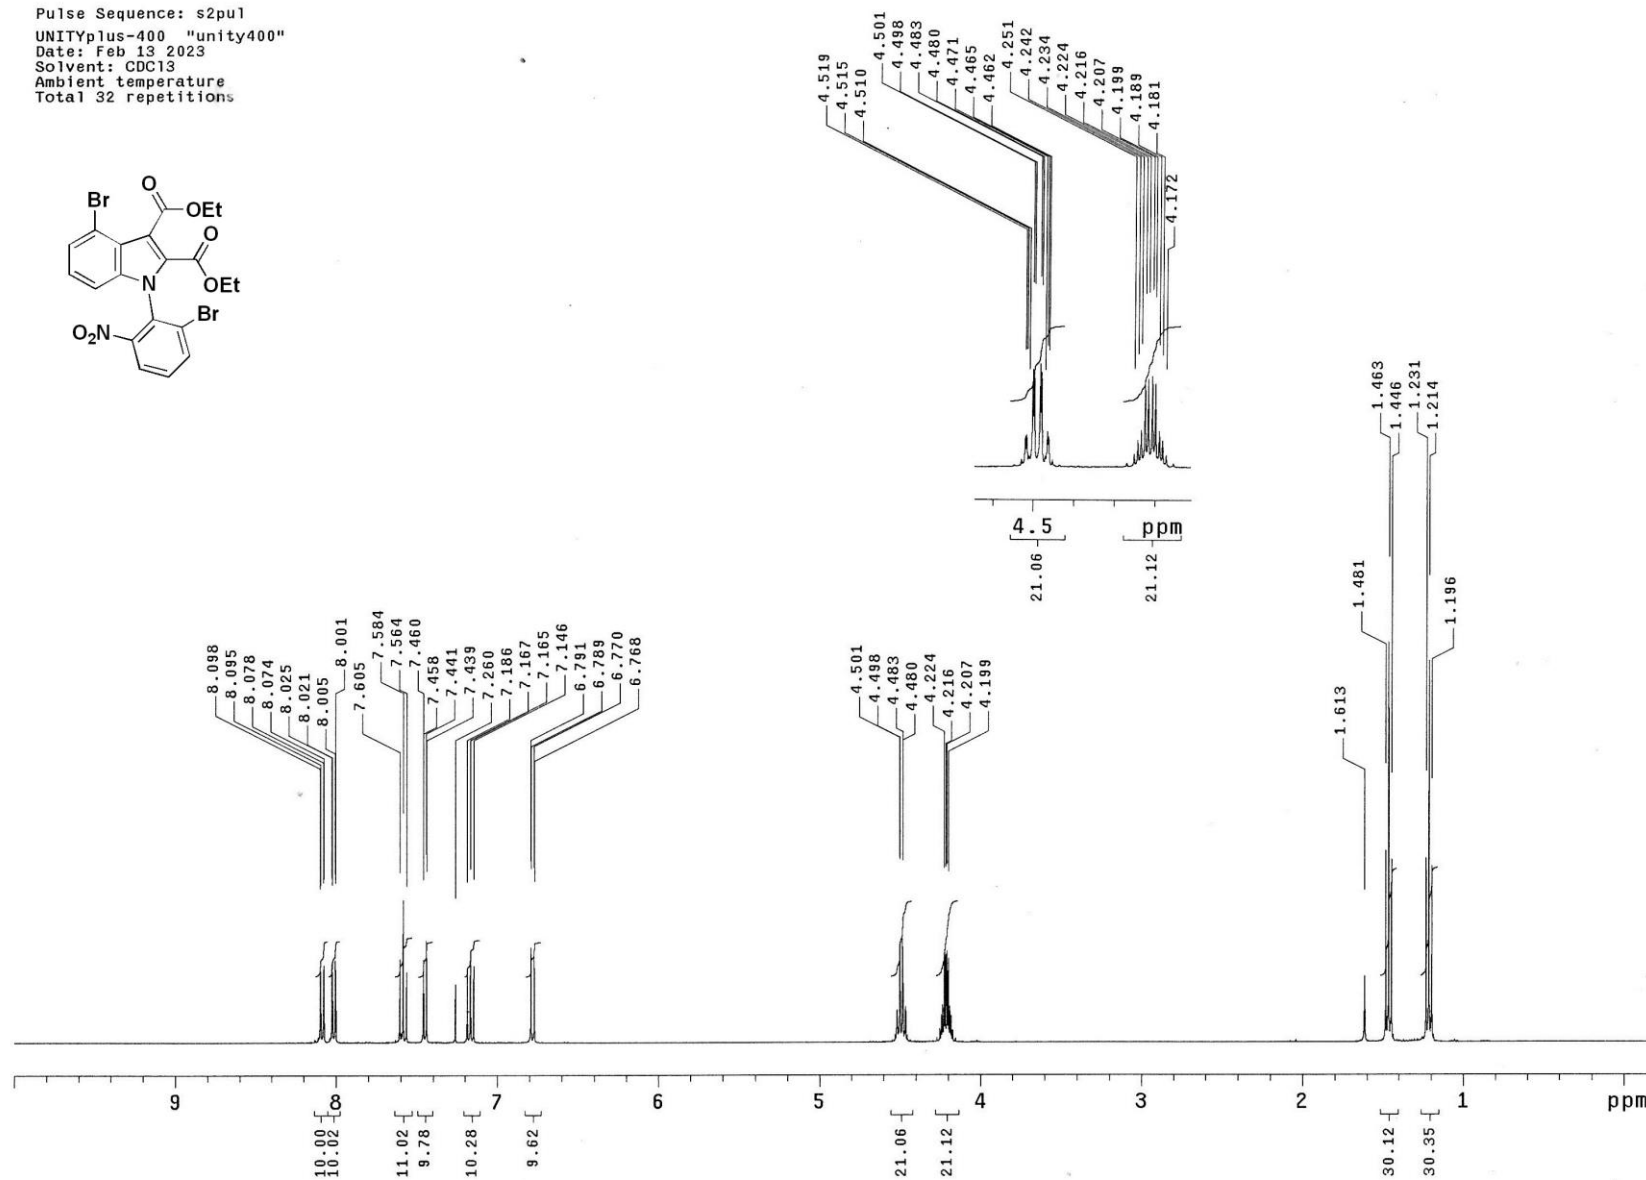

# Compound 4h (<sup>13</sup>C-NMR spectral data)

CHNF0210

Pulse Sequence: s2pu1

UNITYplus-400 "unity400"

Date: Feb 13 2023

Solvent: CDCl<sub>3</sub>

Ambient temperature

Total 4032 repetitions

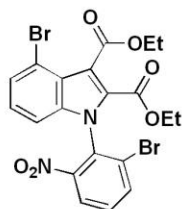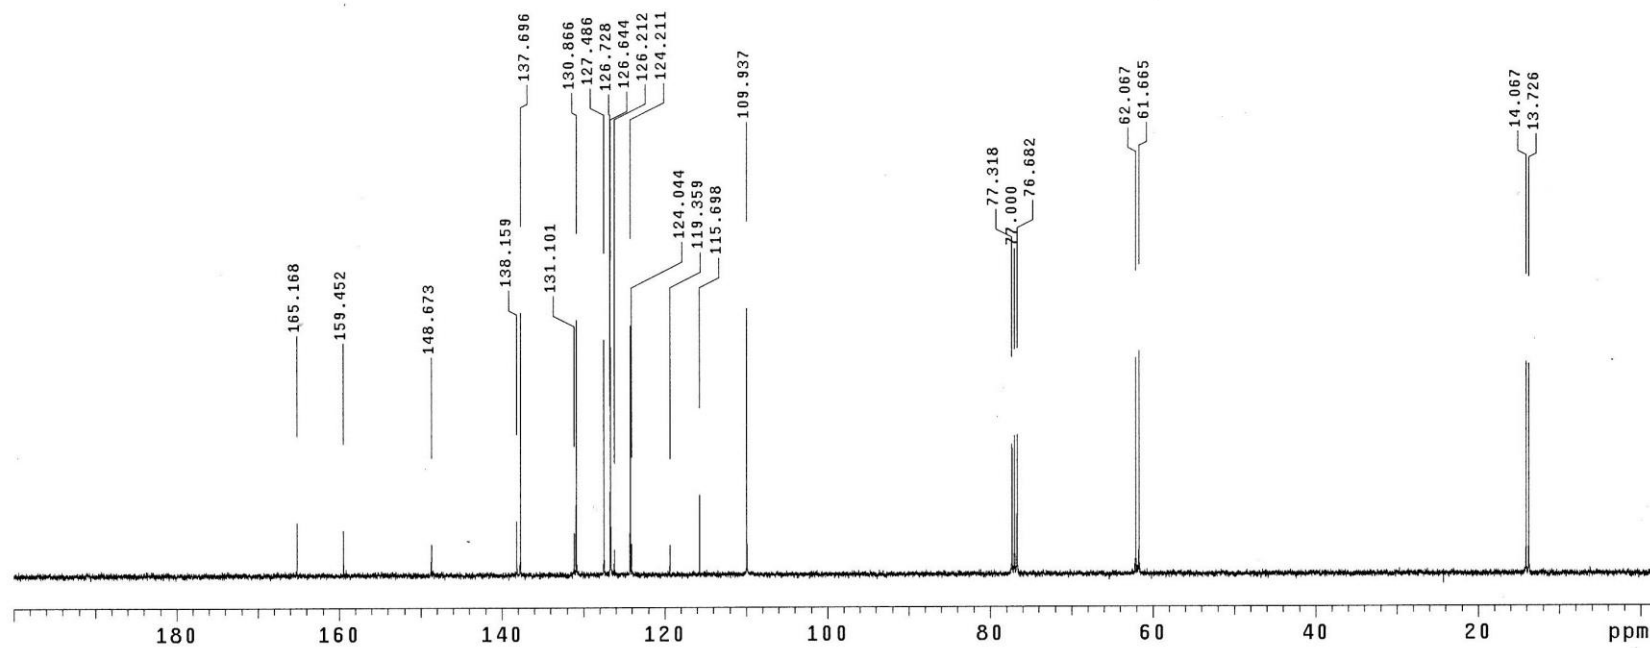

# Compound 4i (<sup>1</sup>H-NMR spectral data)

CHNF0408

Pulse Sequence: s2pu1  
 UNITYplus-400 "unity400"  
 Date: Apr 7 2023  
 Solvent: CDCl<sub>3</sub>  
 Ambient temperature  
 Total 32 repetitions

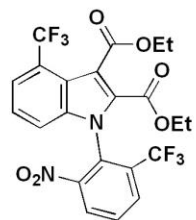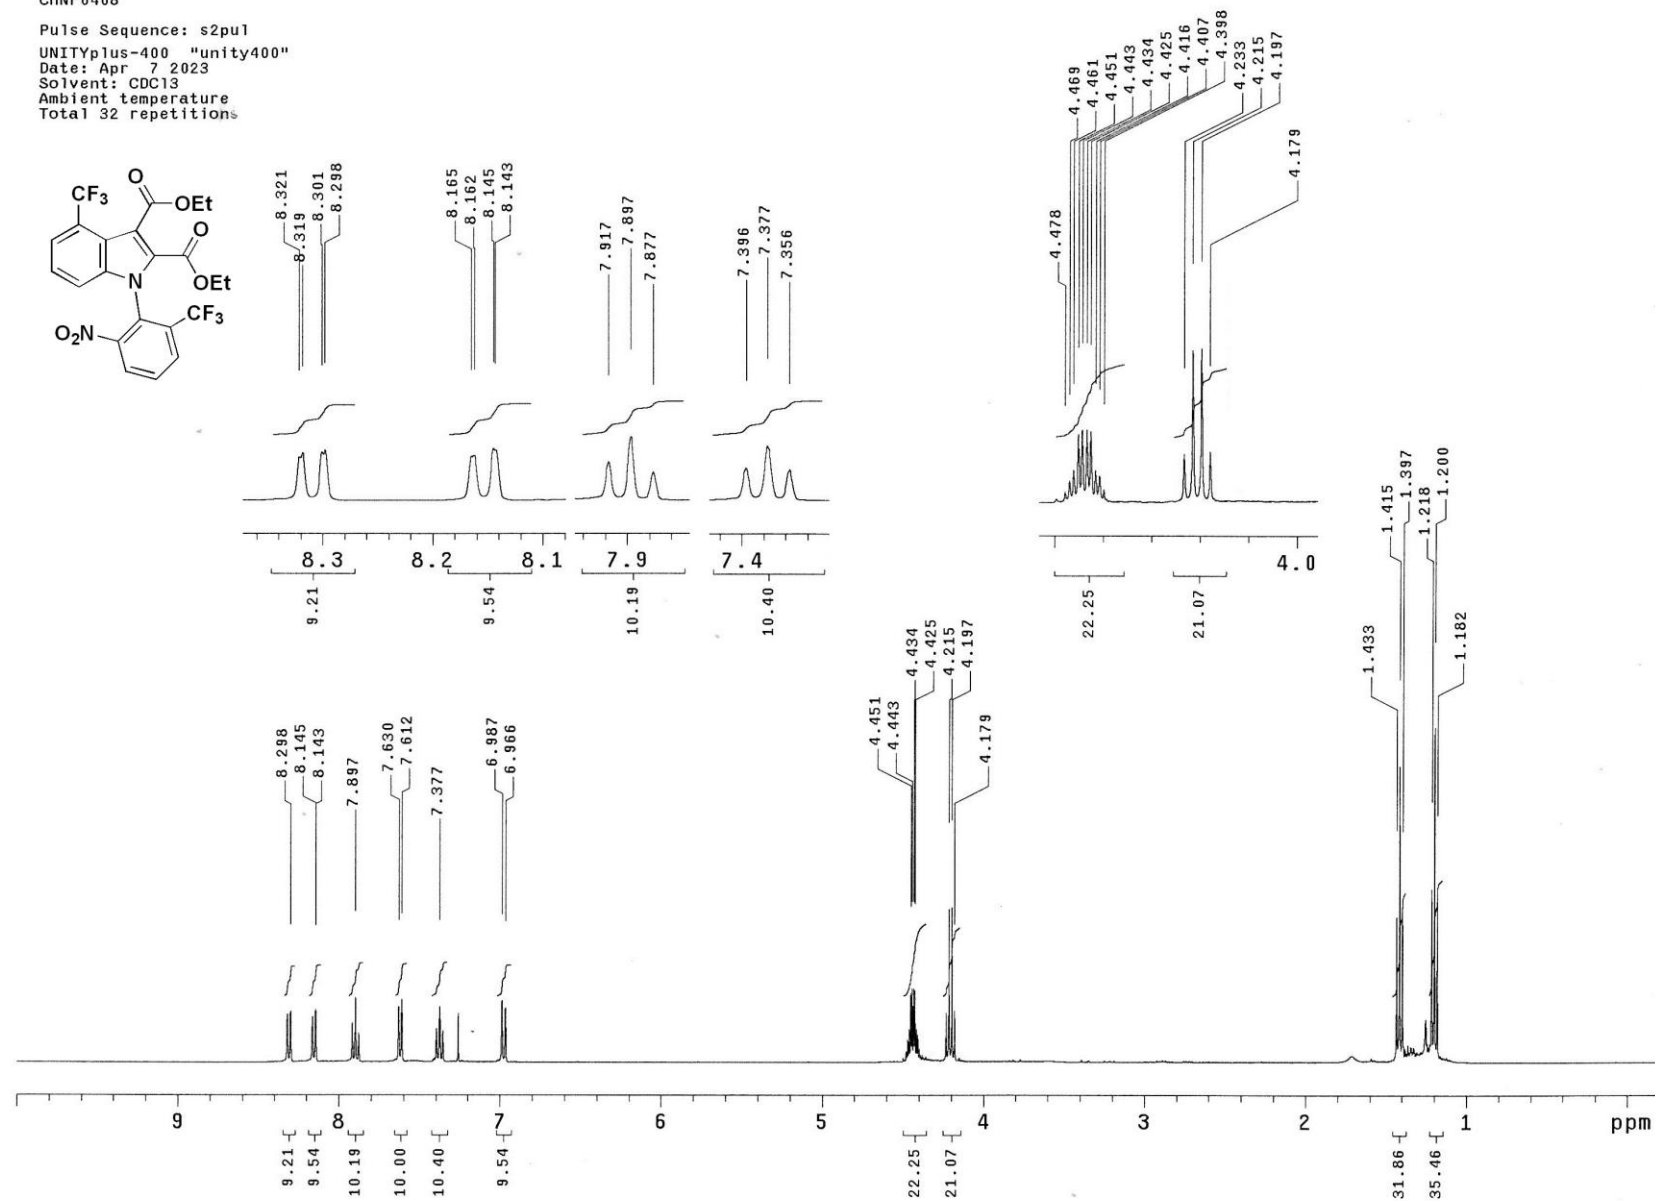

# Compound 4i (<sup>13</sup>C-NMR spectral data)

CHNF0408

Pulse Sequence: s2pu1

UNITYplus-400 "unity400"

Date: Apr 7 2023

Solvent: CDCl<sub>3</sub>

Ambient temperature

Total 2096 repetitions

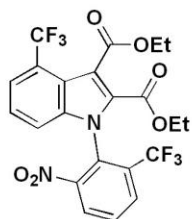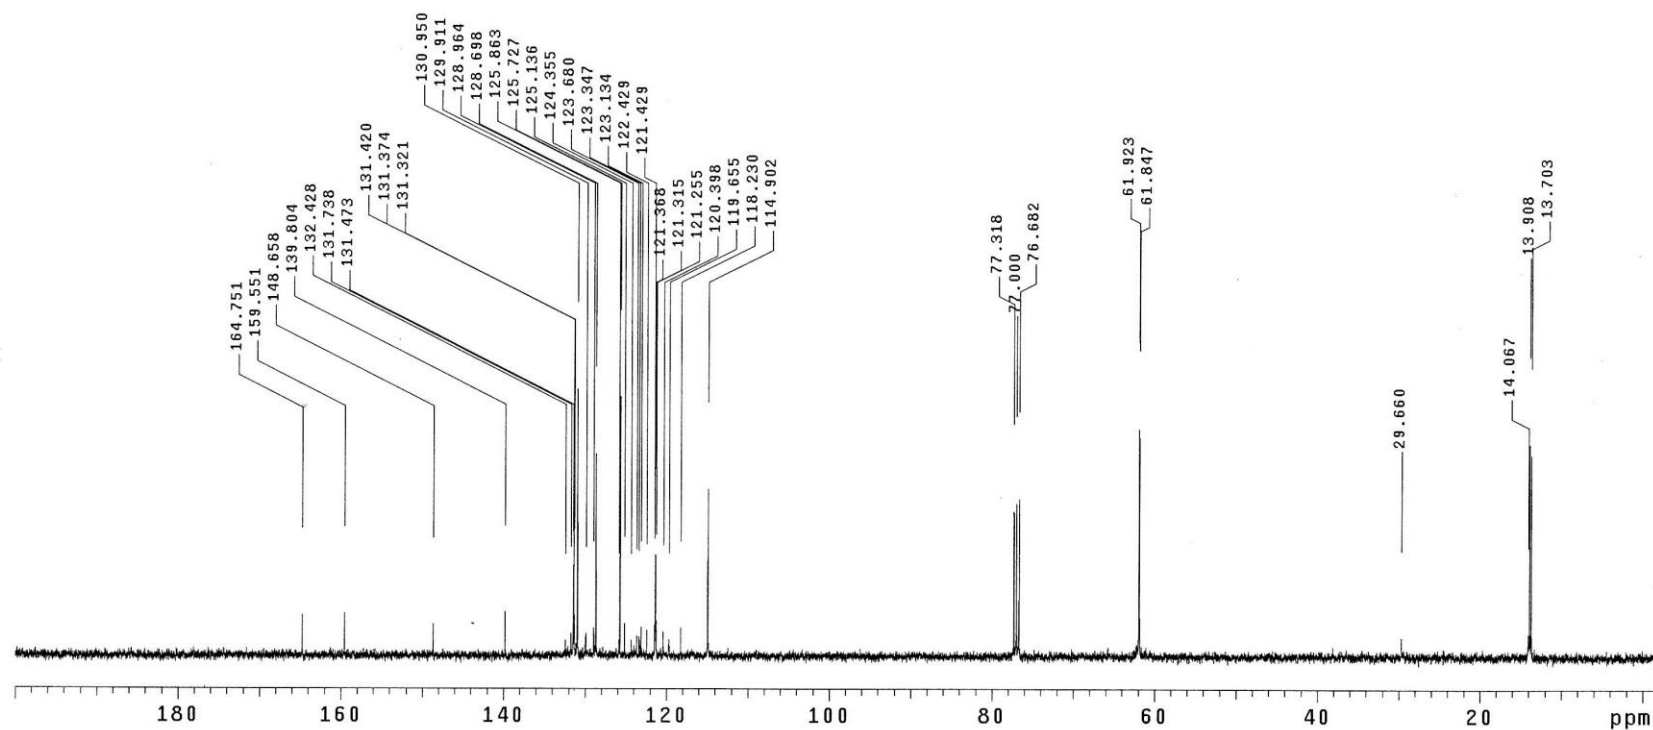

# Compound 4i (<sup>19</sup>F-NMR spectral data)

4i

Pulse Sequence: s2pu1  
Mercury-400BB "MerPlus400"  
Date: Jan 18 2024  
Solvent: cdcl3  
Ambient temperature  
Total 16 repetitions

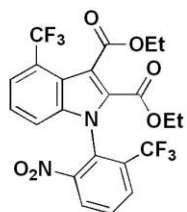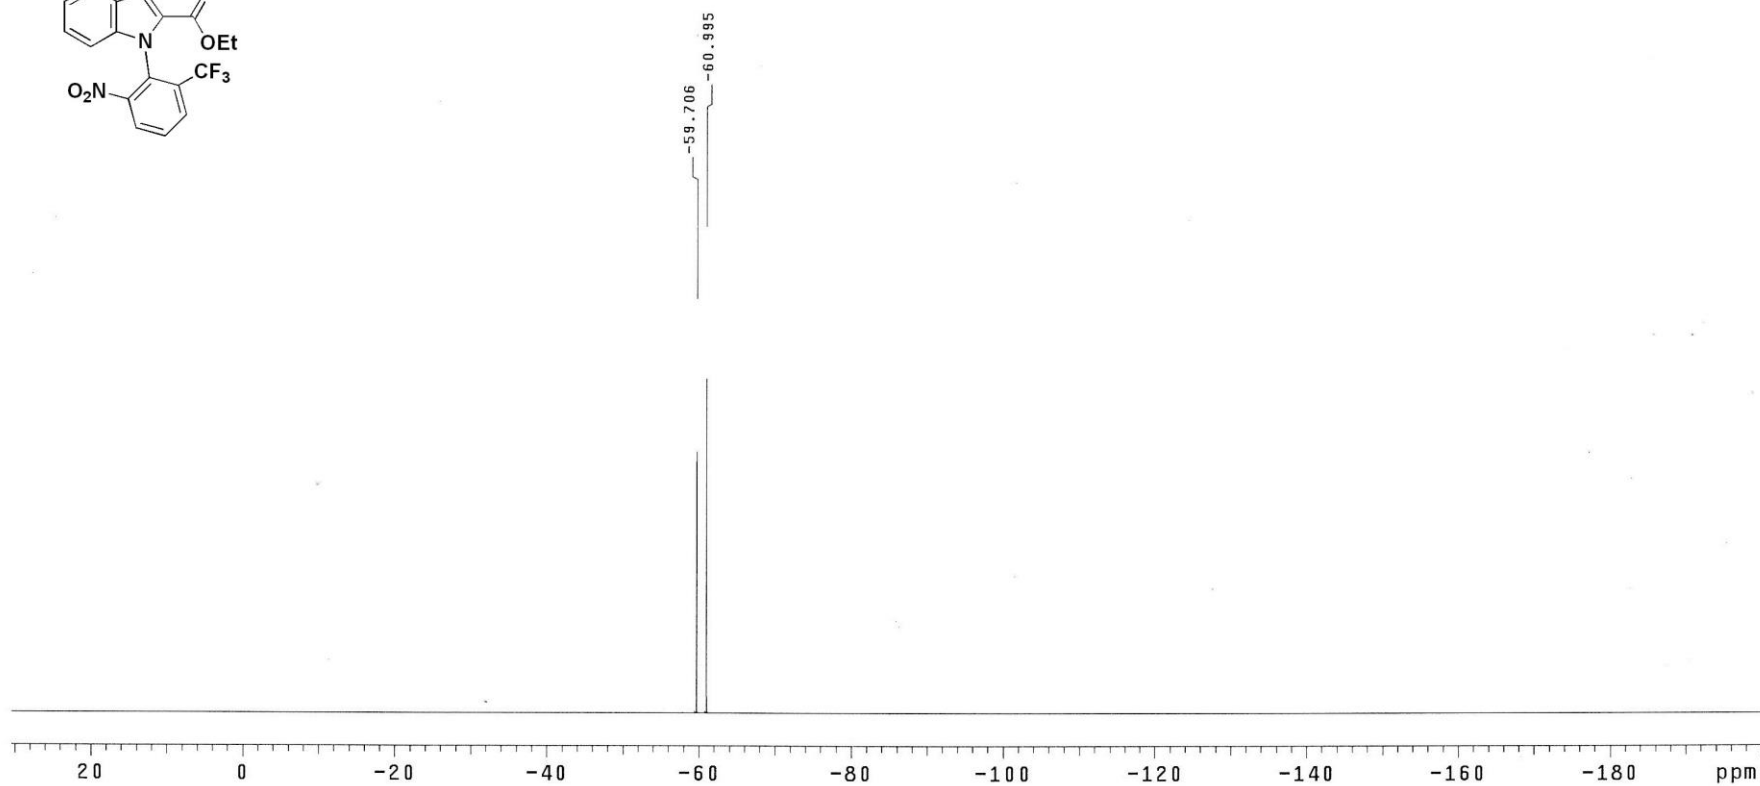

# Compound 4j (<sup>1</sup>H-NMR spectral data)

CHNF0309

Pulse Sequence: s2pu1  
 UNITYplus-400 "unity400"  
 Date: Mar 9 2023  
 Solvent: CDCl<sub>3</sub>  
 Ambient temperature  
 Total 32 repetitions

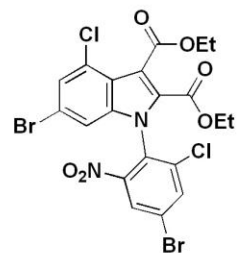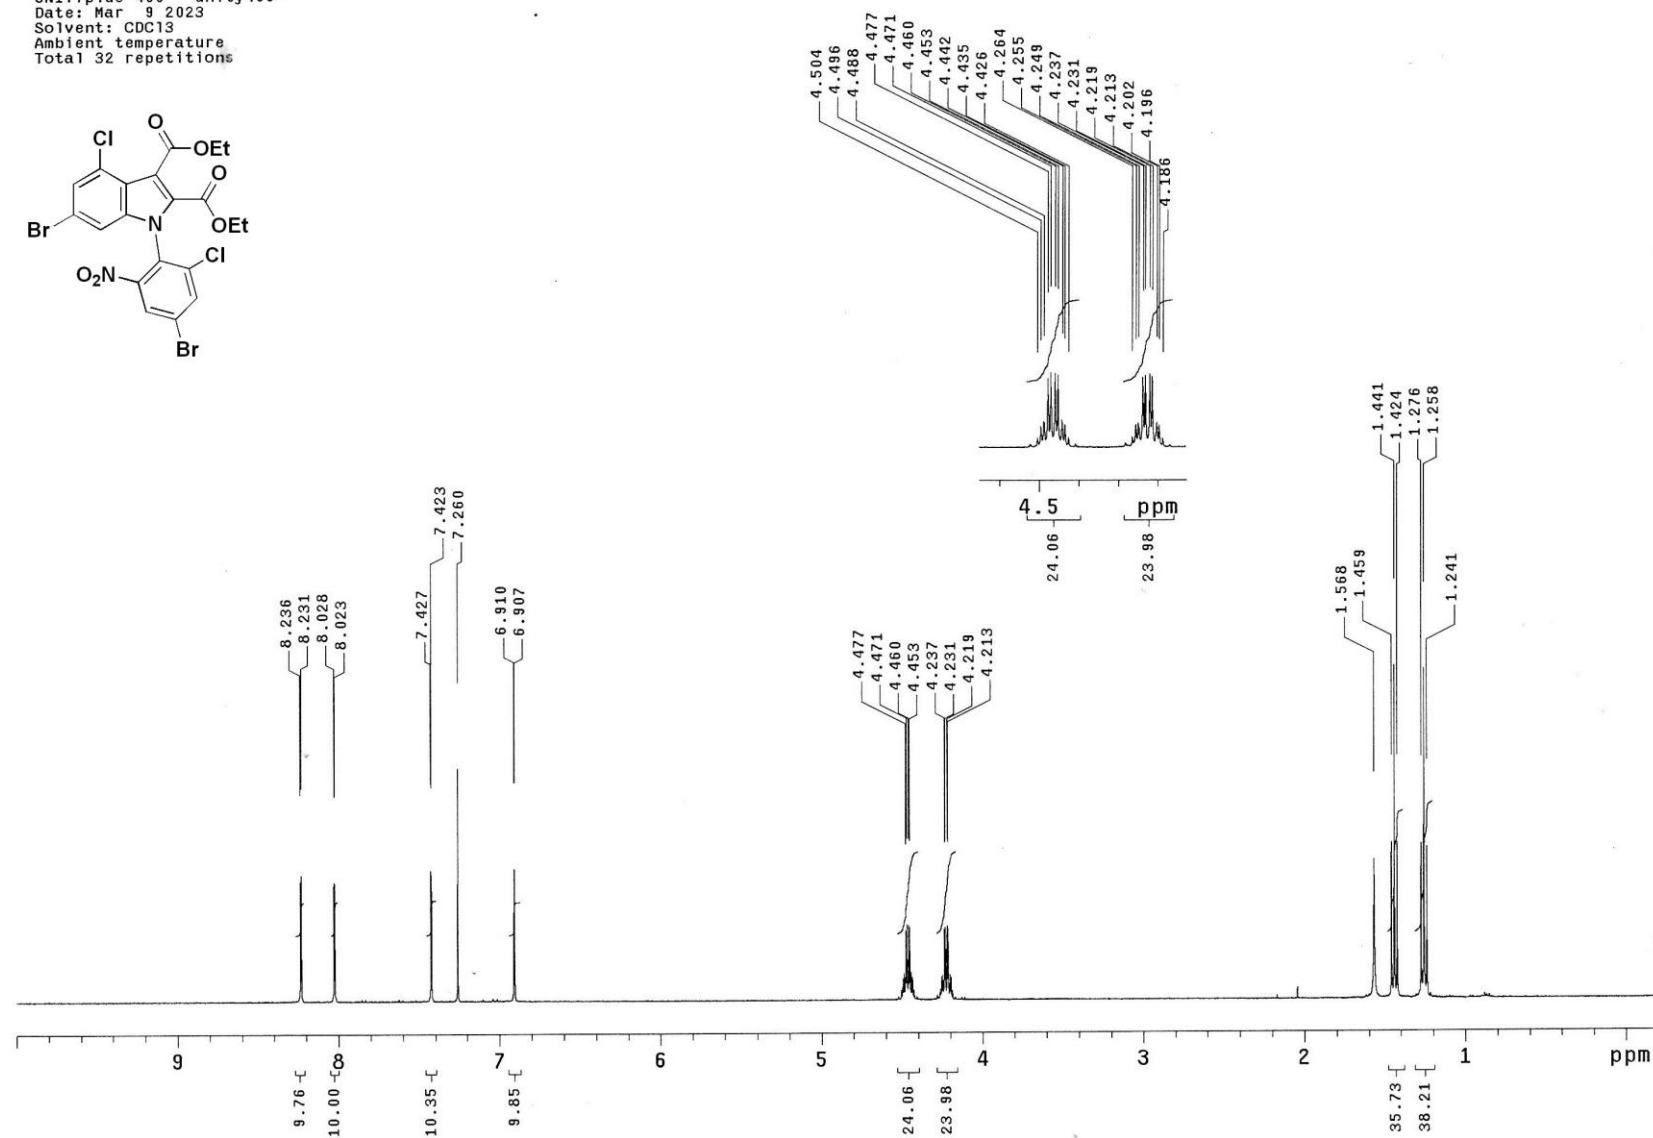



# Compound 4j (<sup>13</sup>C-NMR spectral data)

CHNF0309

Pulse Sequence: s2pu1

UNITYplus-400 "unity400"

Date: Mar 9 2023

Solvent: CDCl<sub>3</sub>

Ambient temperature

Total 8880 repetitions

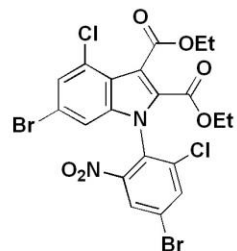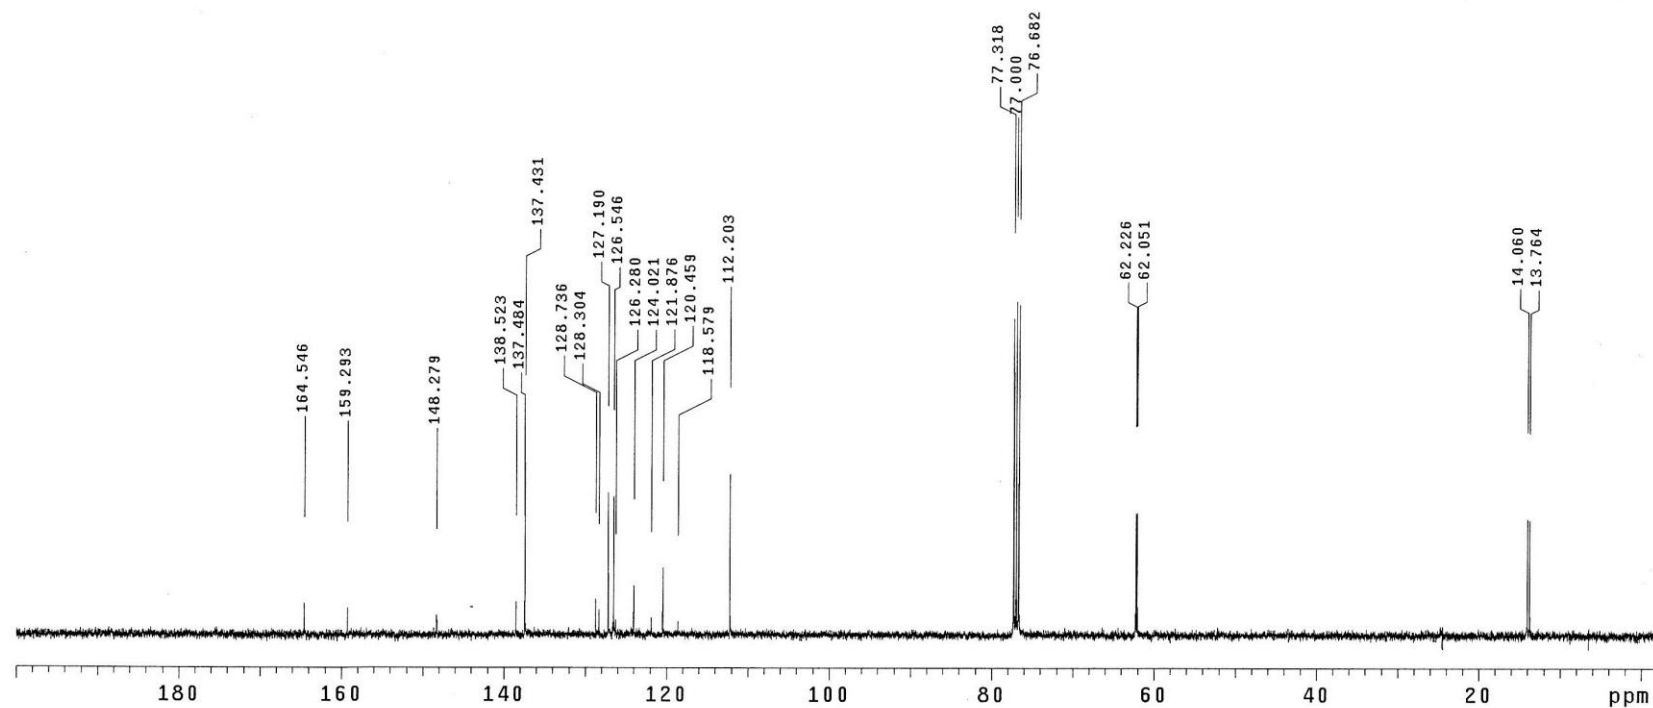

# Compound 4k (<sup>1</sup>H-NMR spectral data)

CHNF0413

Pulse Sequence: s2pu1  
 UNITYplus-400 "unity400"  
 Date: Apr 13 2023  
 Solvent: CDCl<sub>3</sub>  
 Ambient temperature  
 Total 32 repetitions

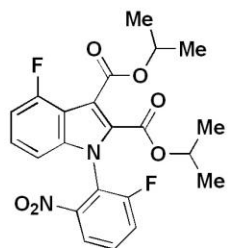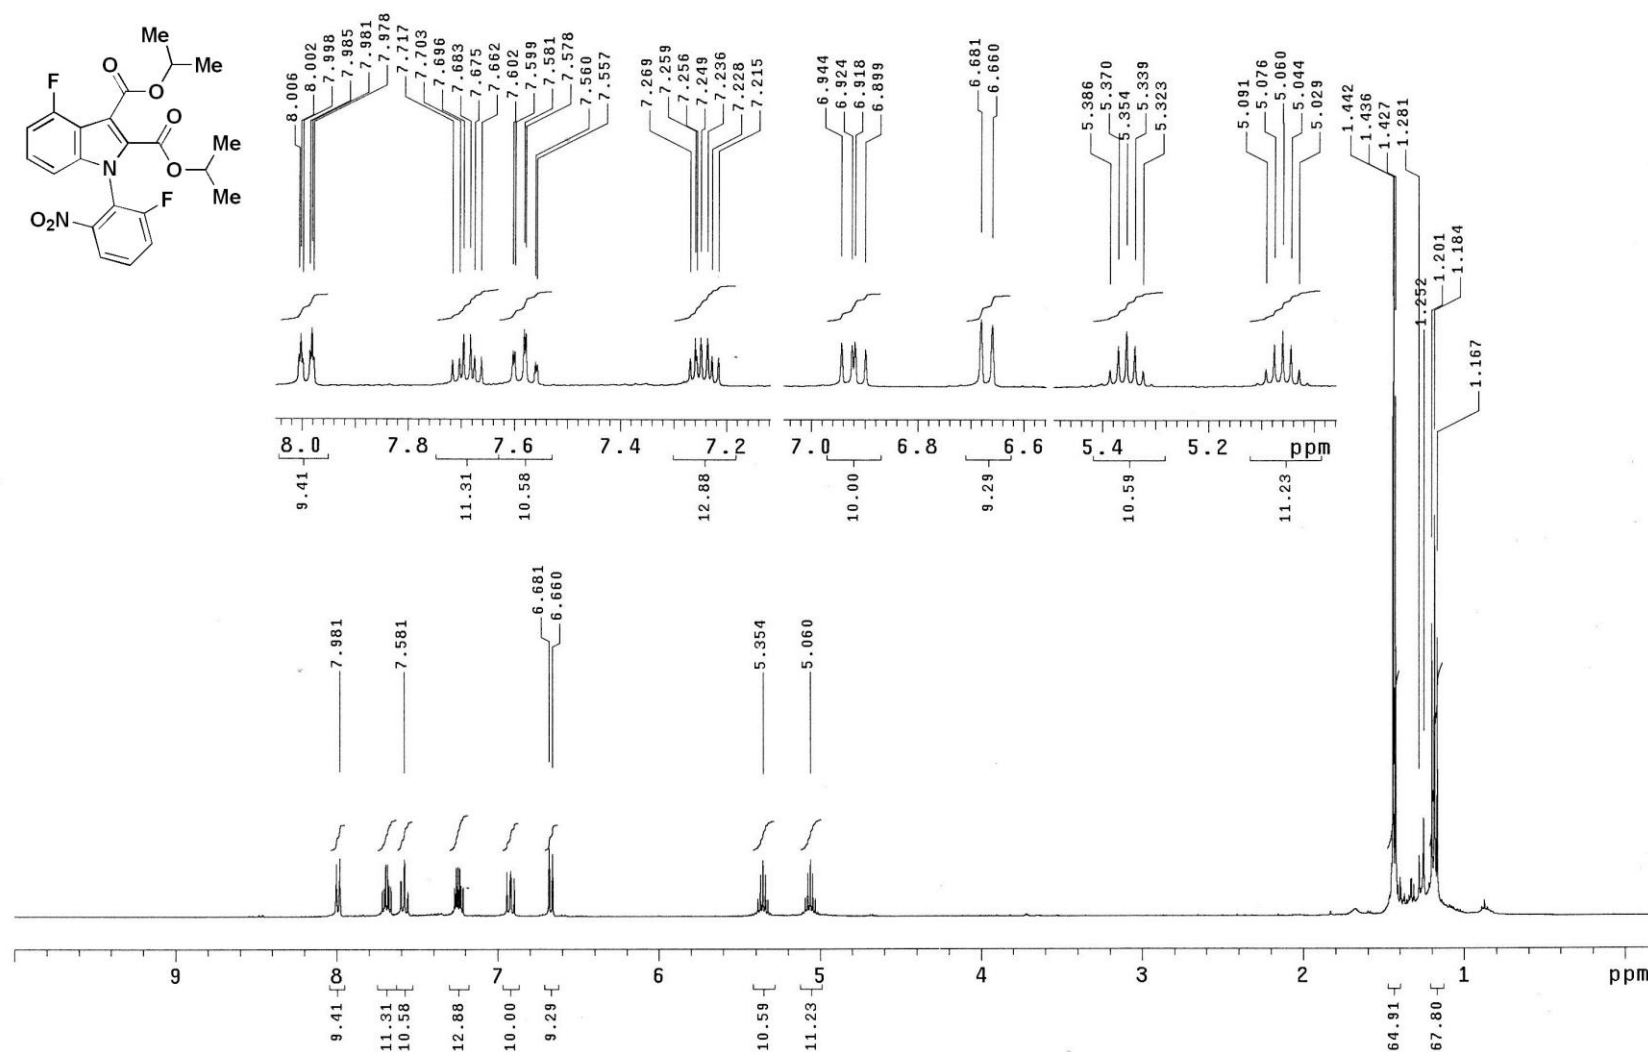

# Compound 4k (<sup>13</sup>C-NMR spectral data)

CHNF0413

Pulse Sequence: s2pu1  
 UNITYplus-400 "unity400"  
 Date: Apr 13 2023  
 Solvent: CDCl<sub>3</sub>  
 Ambient temperature  
 Total 4544 repetitions

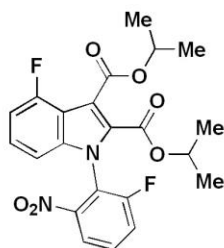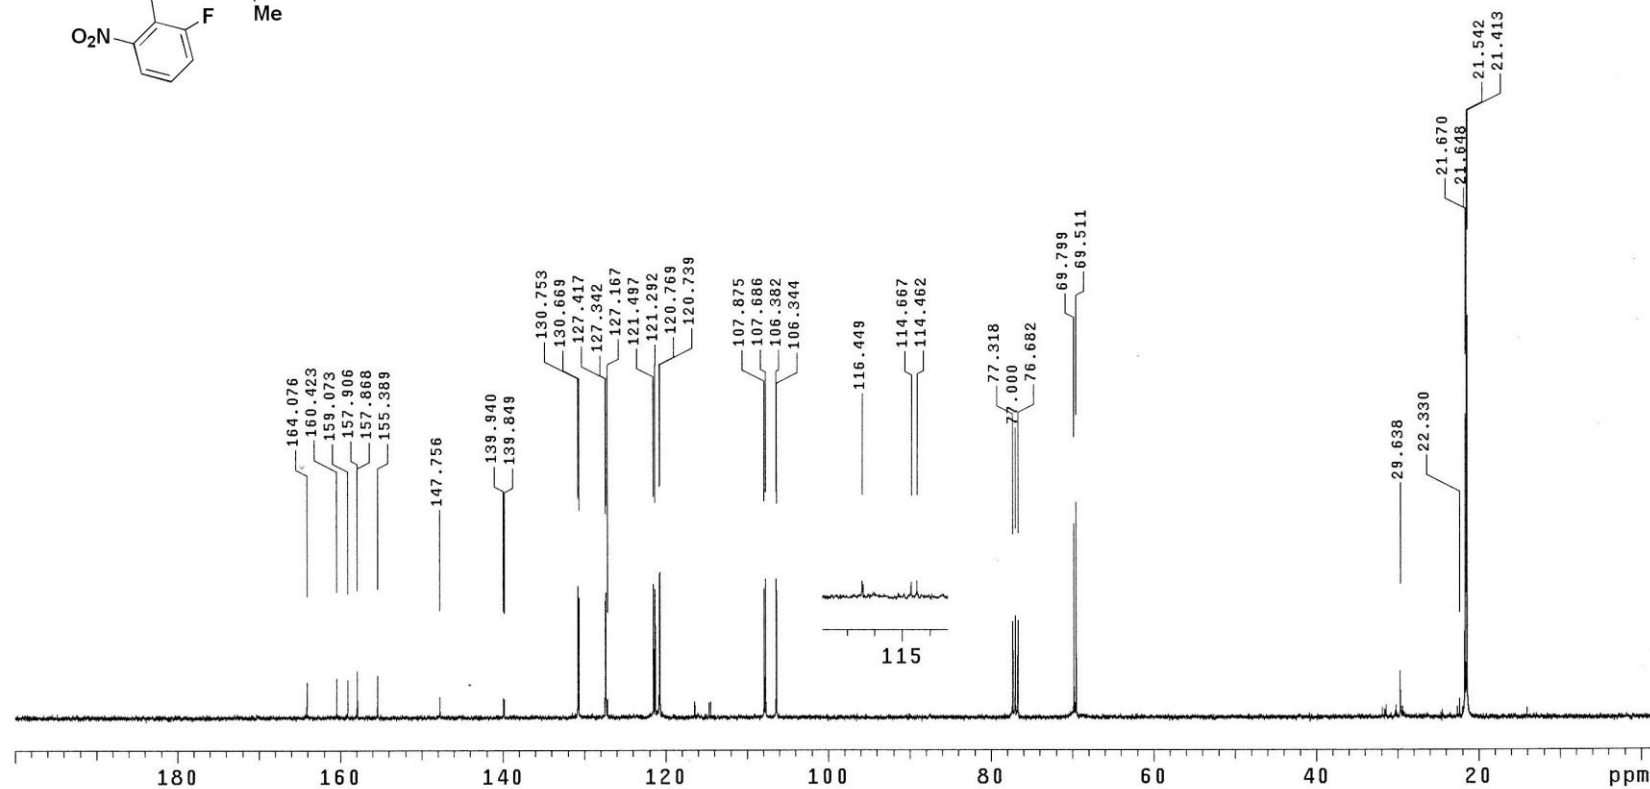

# Compound 4k (<sup>19</sup>F-NMR spectral data)

4k

Pulse Sequence: s2pu1,  
Mercury-400BB "MerPlus400"  
Date: Jan 17 2024  
Solvent: cdc13  
Ambient temperature  
Total 96 repetitions

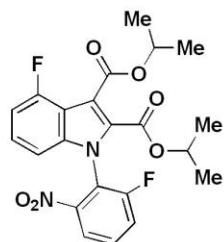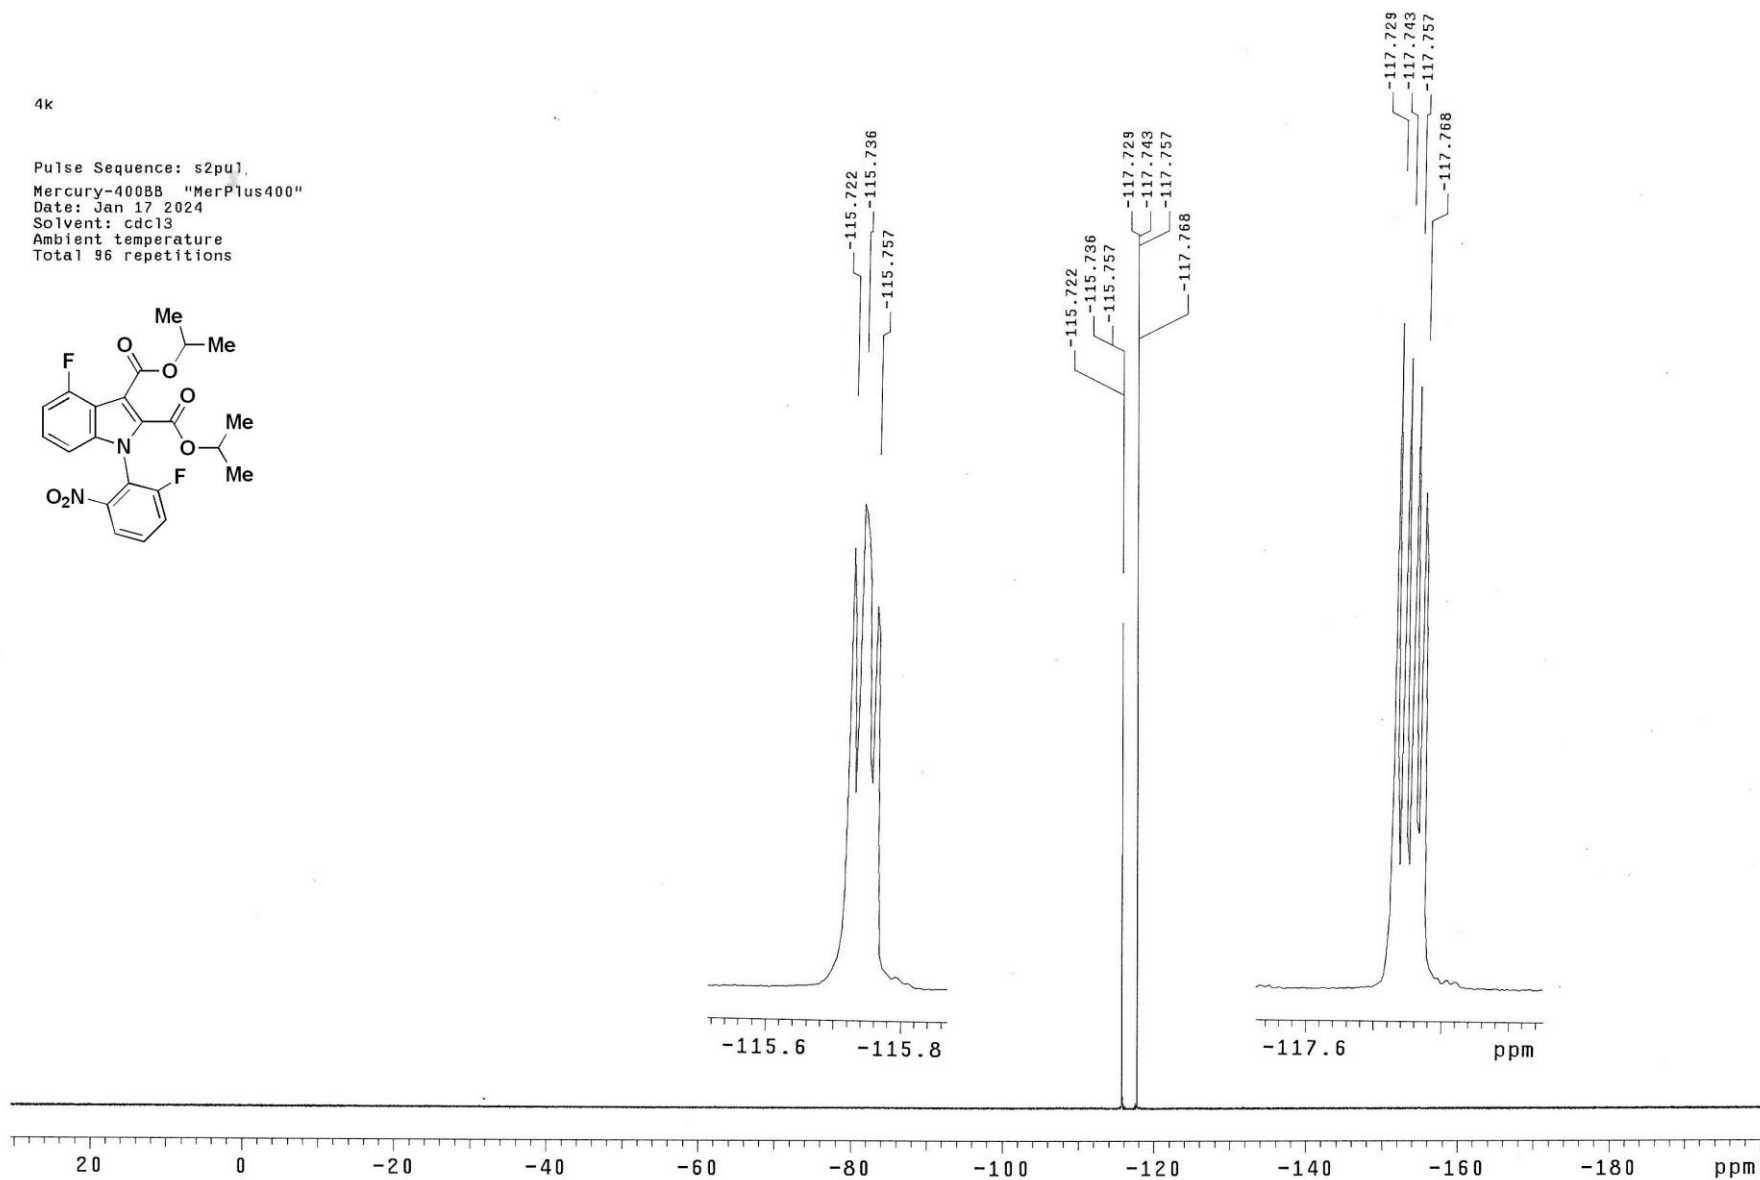

# Compound 4I (<sup>1</sup>H-NMR spectral data)

CHNF0320

Pulse Sequence: s2pu1

UNITYplus-400 "unity400"

Date: Apr 13 2023

Solvent: CDCl<sub>3</sub>

Ambient temperature

Total 32 repetitions

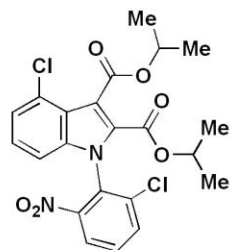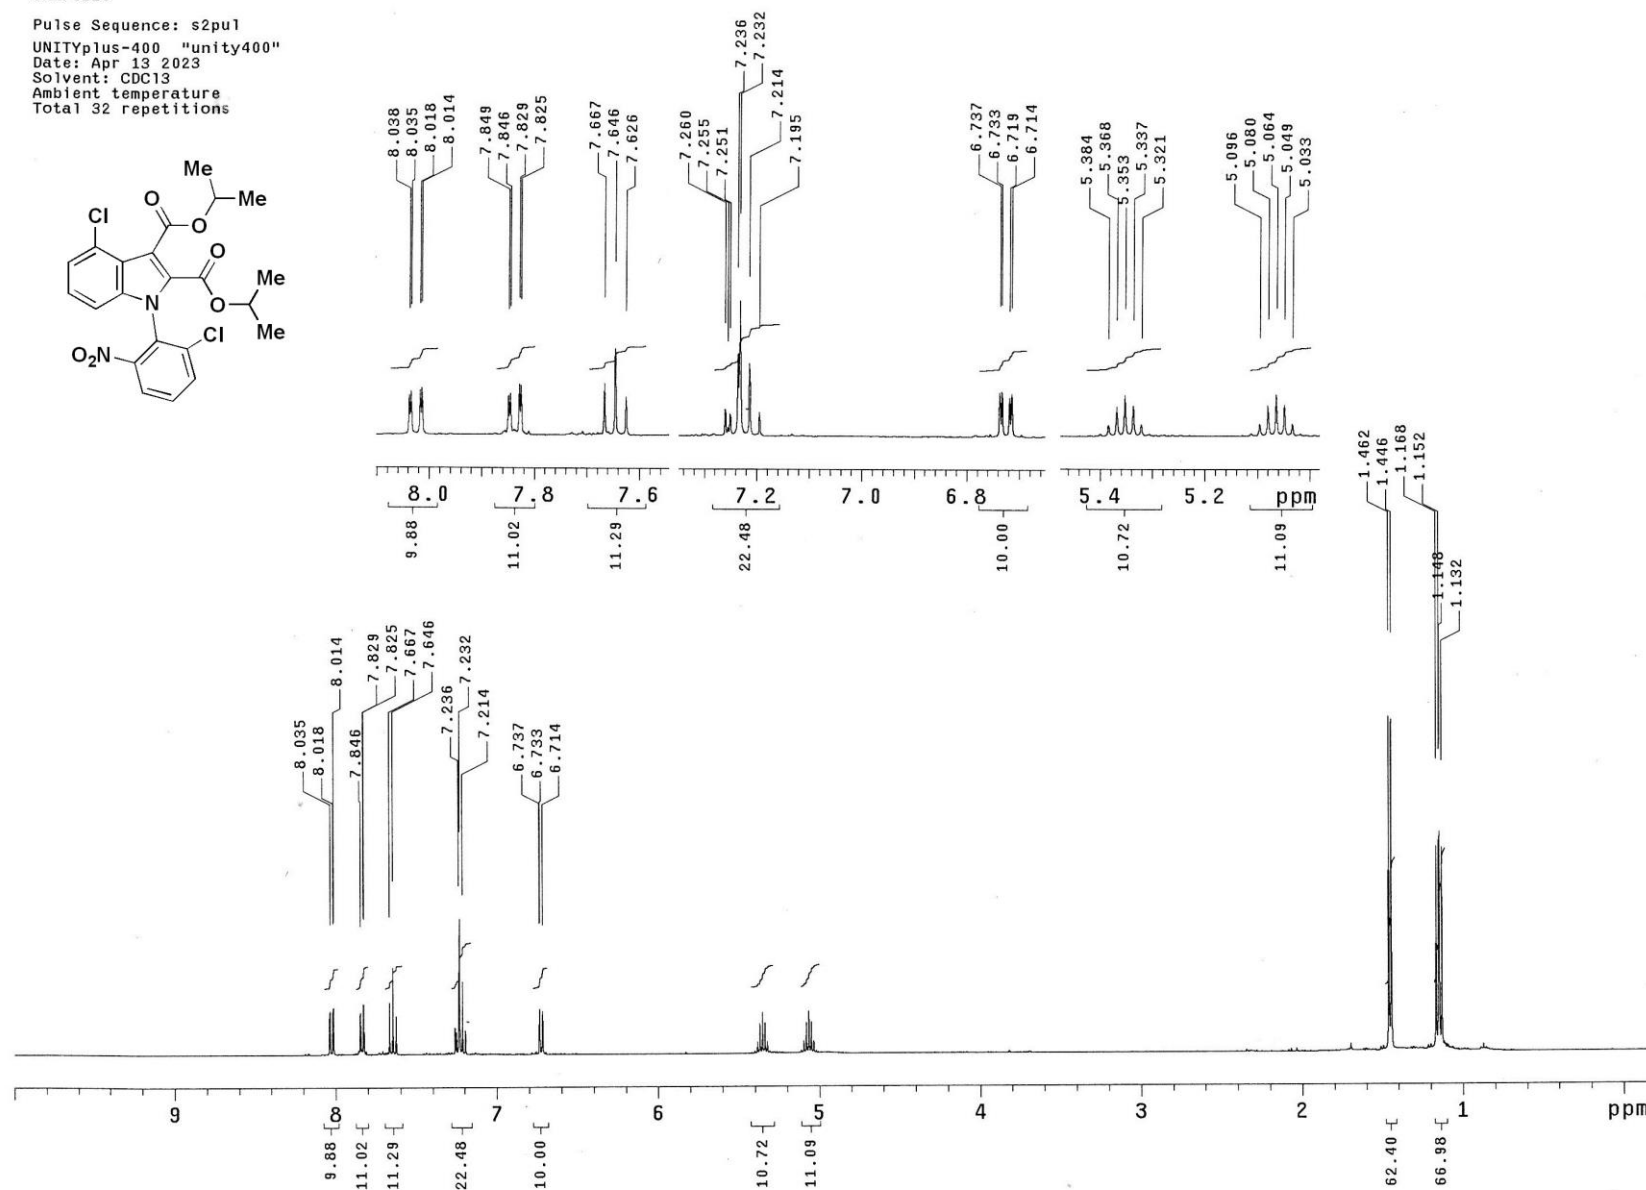

# Compound 4I (<sup>13</sup>C-NMR spectral data)

CHNF0320

Pulse Sequence: s2pu1  
 UNITYplus-400 "unity400"  
 Date: Apr 13 2023  
 Solvent: CDCl<sub>3</sub>  
 Ambient temperature  
 Total 512 repetitions

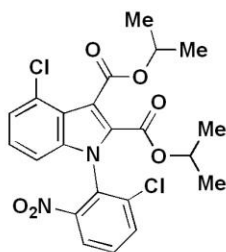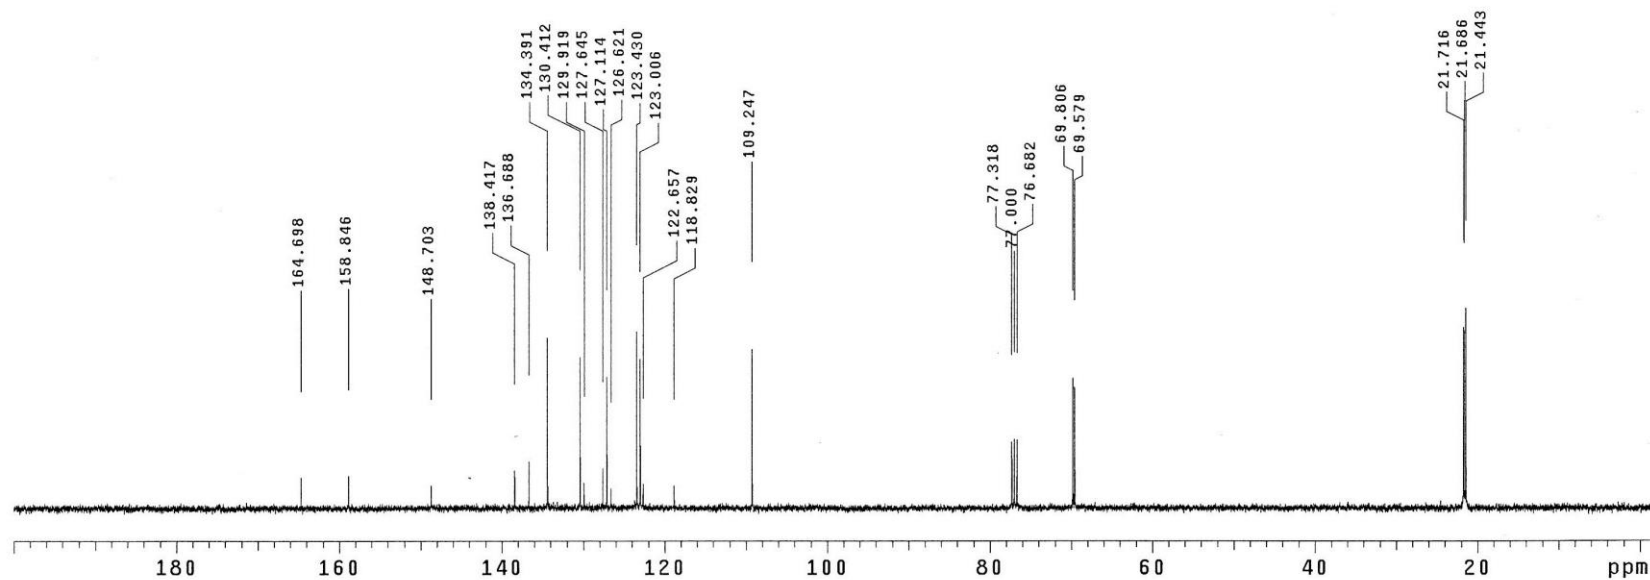

# Compound 4m (<sup>1</sup>H-NMR spectral data)

CHNF0506

Pulse Sequence: s2pu1

UNITYplus-400 "unity400"

Date: May 5 2023

Solvent: CDCl<sub>3</sub>

Ambient temperature

Total 32 repetitions

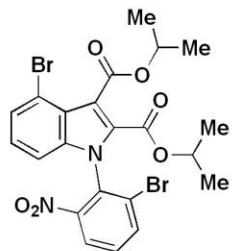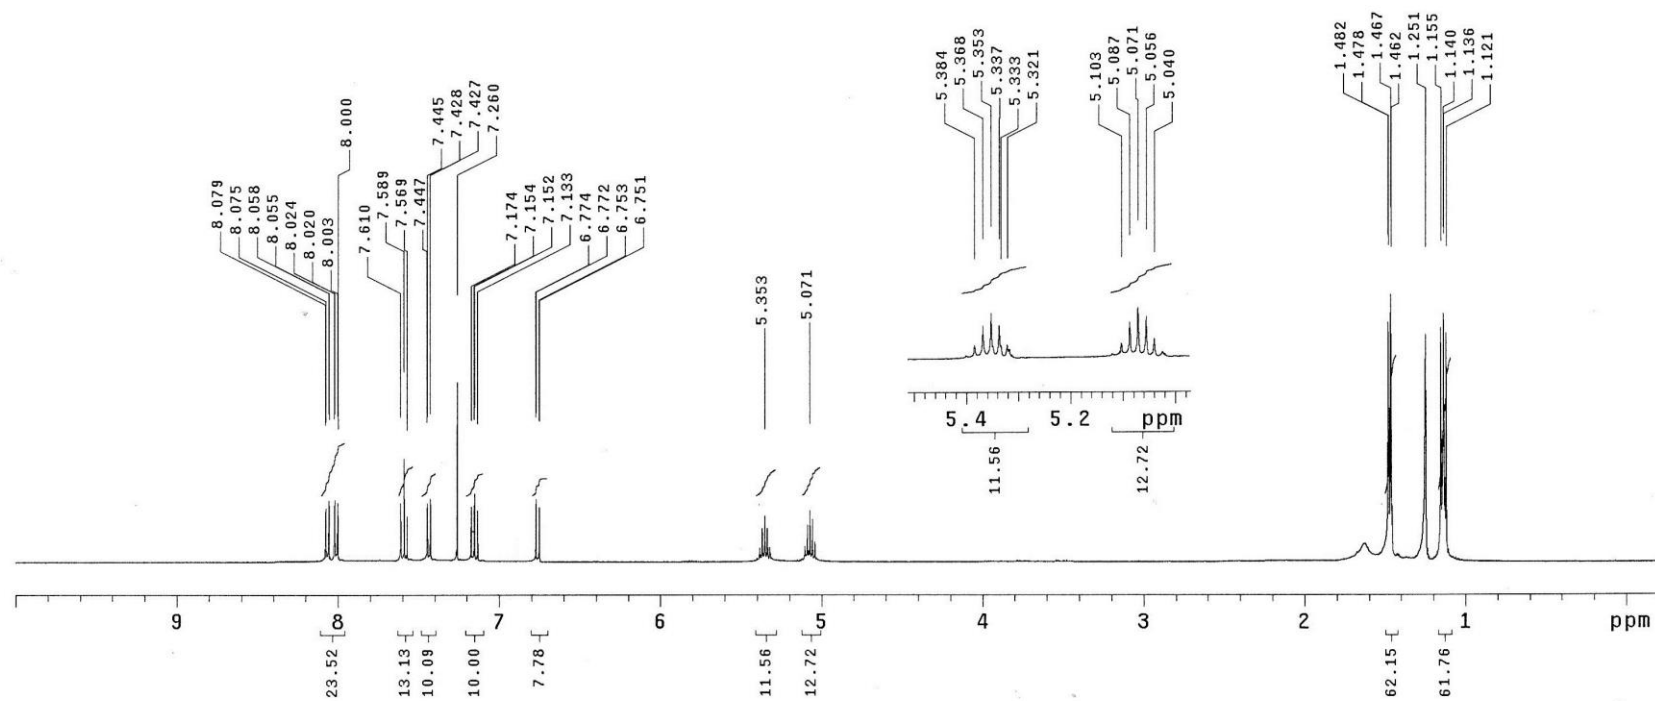

# Compound 4m (<sup>13</sup>C-NMR spectral data)

CHNF0506

Pulse Sequence: s2pu1  
 UNITYplus-400 "unity400"  
 Date: May 5 2023  
 Solvent: CDCl<sub>3</sub>  
 Ambient temperature  
 Total 10256 repetitions

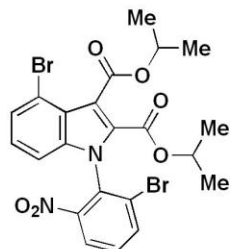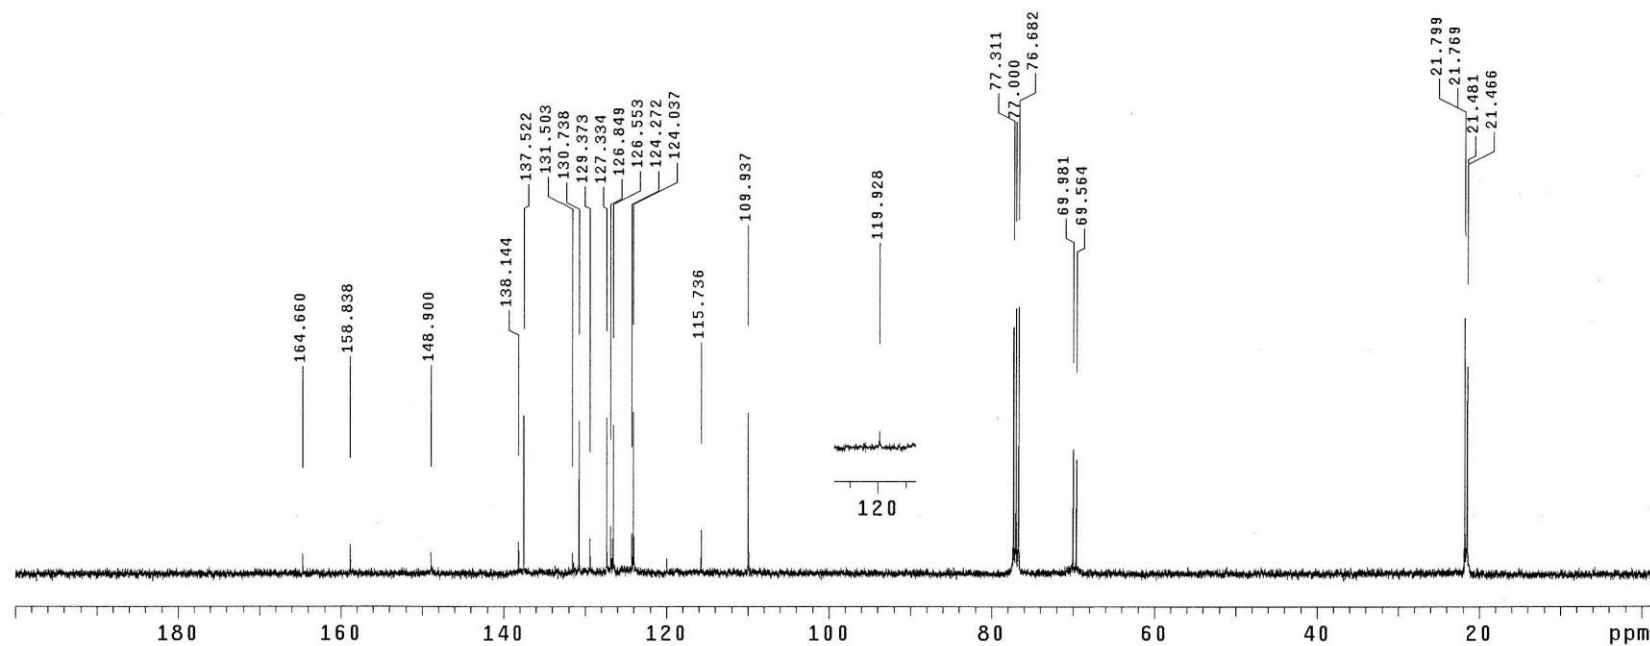



# Compound 4n (<sup>1</sup>H-NMR spectral data)

CHNF0425

Pulse Sequence: s2pu1

UNITYplus-400 "unity400"

Date: Aug 24 2023

Solvent: CDCl<sub>3</sub>

Ambient temperature

Total 80 repetitions

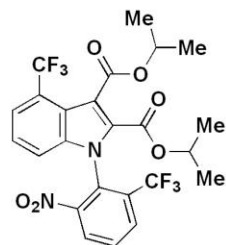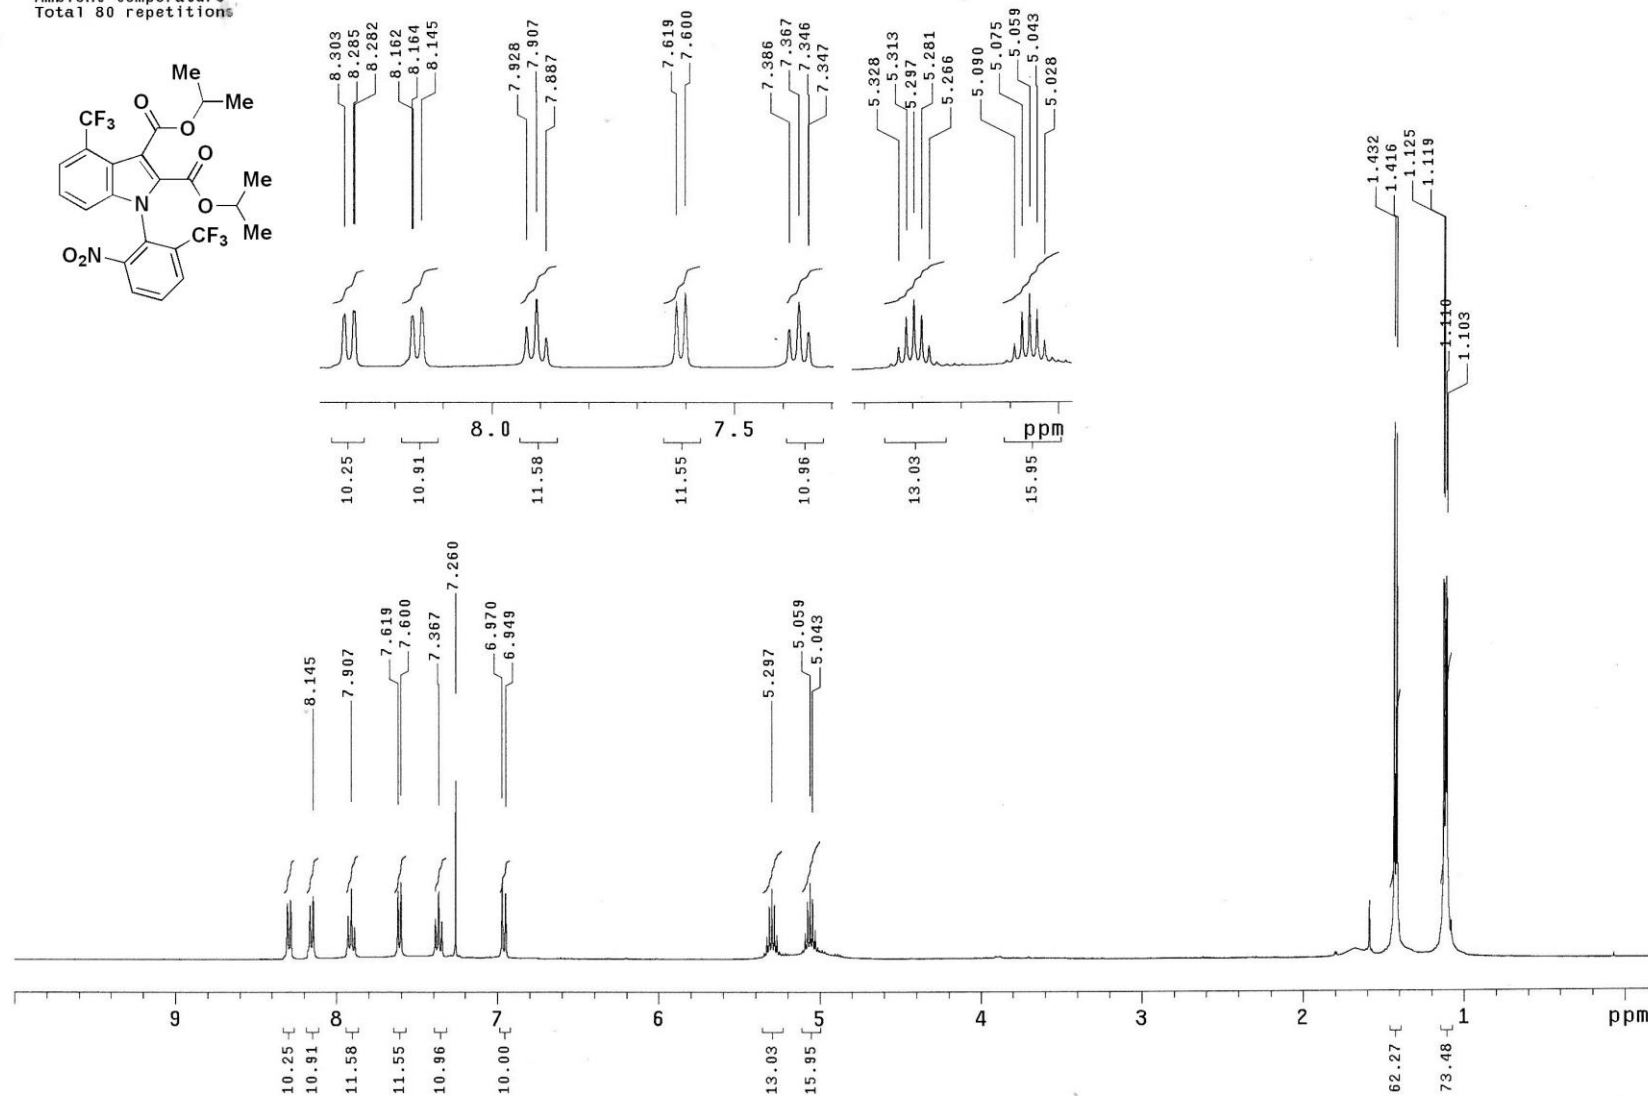

# Compound 4n (<sup>13</sup>C-NMR spectral data)

CHNF0425

Pulse Sequence: s2pu1  
 UNITYplus-400 "unity400"  
 Date: Aug 24 2023  
 Solvent: CDCl<sub>3</sub>  
 Ambient temperature  
 Total 7392 repetitions

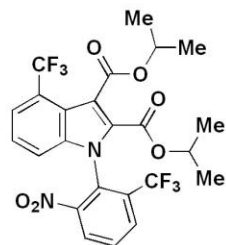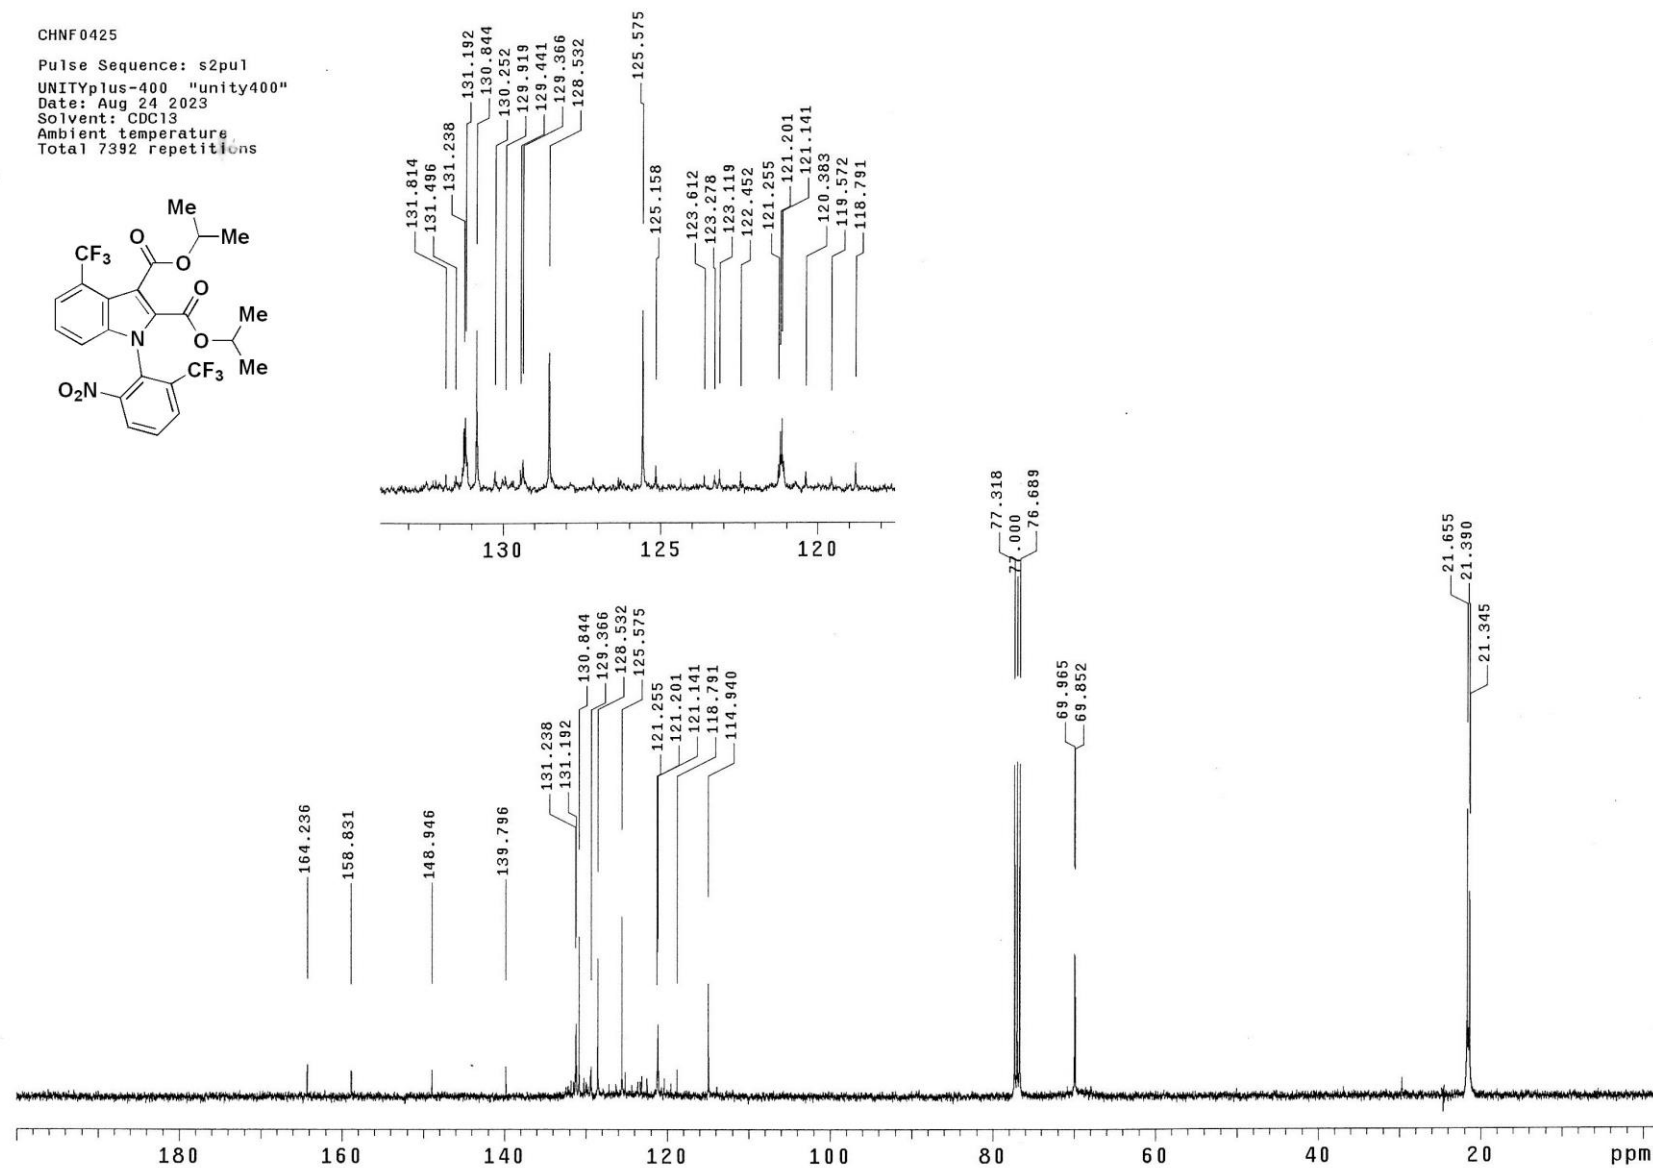

# Compound 4n (<sup>19</sup>F-NMR spectral data)

4n

Pulse Sequence: s2pu1  
Mercury-400BB "MerPlus400"  
Date: Jan 18 2024  
Solvent: cdcl3  
Ambient temperature  
Total 32 repetitions

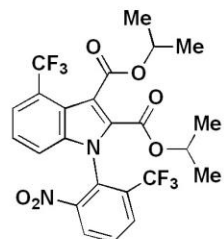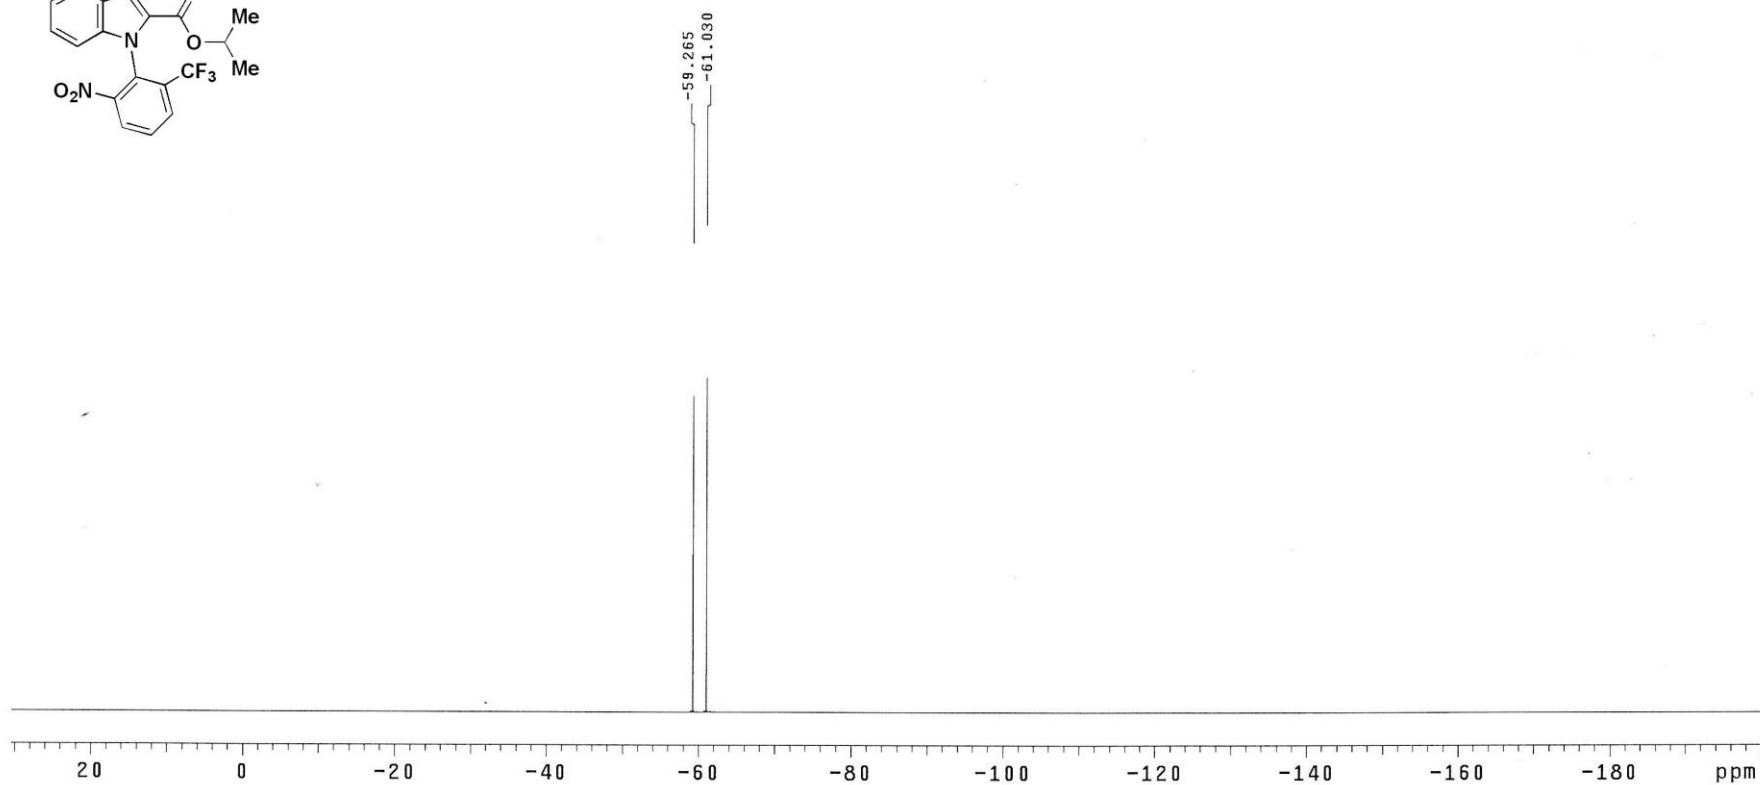

# Compound 4o (<sup>1</sup>H-NMR spectral data)

CHNF0504

Pulse Sequence: s2pu1  
 UNITYplus-400 "unity400"  
 Date: May 4 2023  
 Solvent: CDCl<sub>3</sub>  
 Ambient temperature  
 Total 32 repetitions

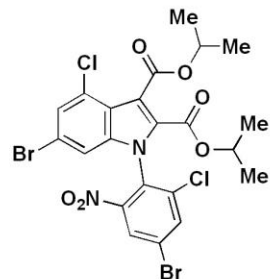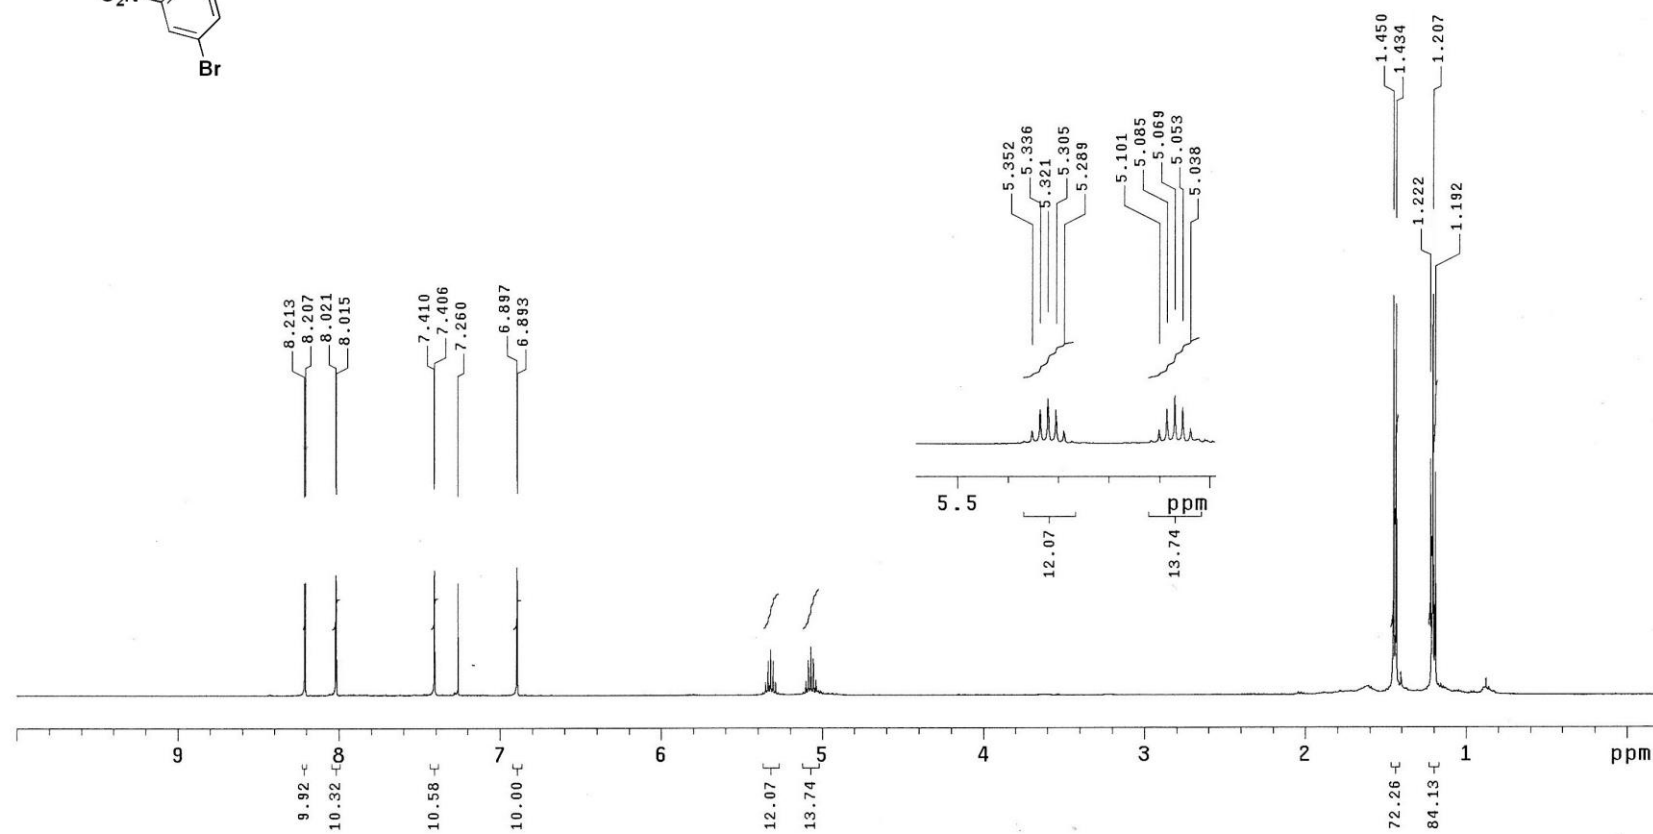

# Compound 4o (<sup>13</sup>C-NMR spectral data)

CHNF0504

Pulse Sequence: s2pu1  
 UNITYplus-400 "unity400"  
 Date: May 4 2023  
 Solvent: CDCl<sub>3</sub>  
 Ambient temperature  
 Total 4368 repetitions

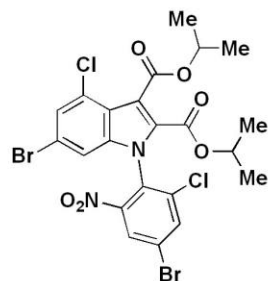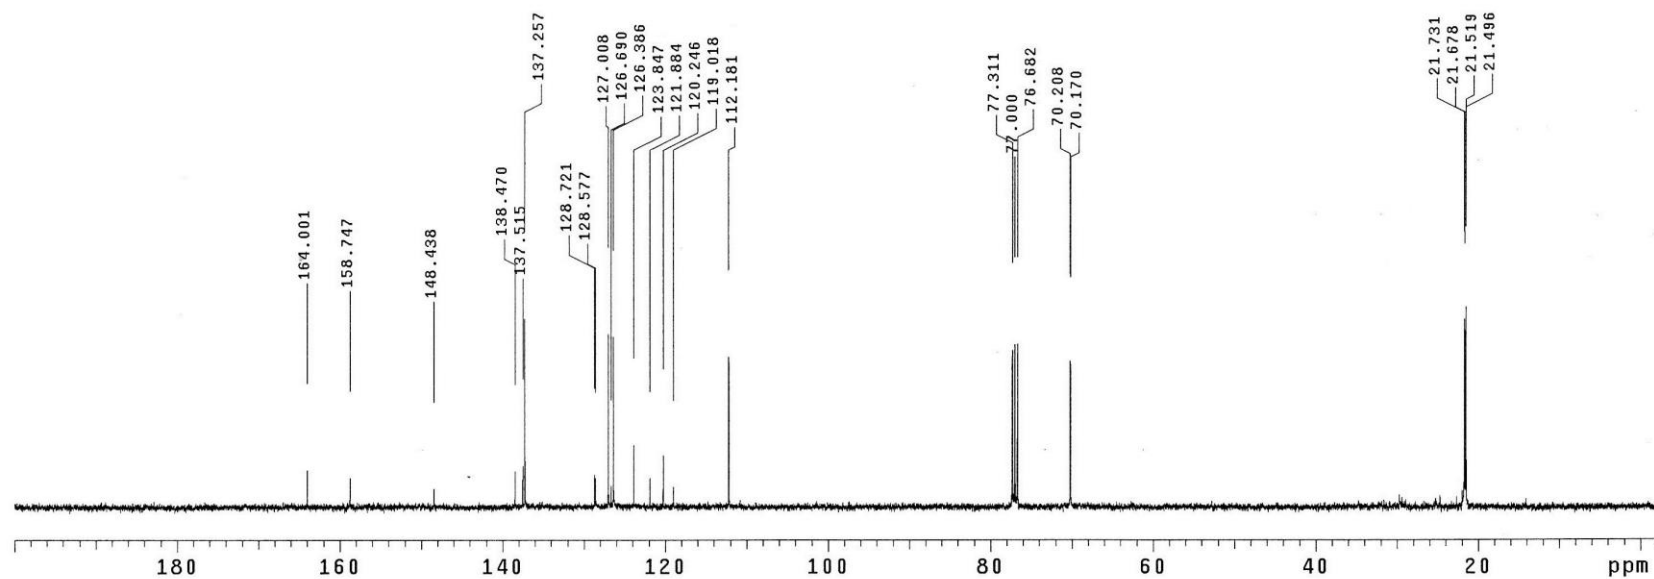

# Compound 4p (<sup>1</sup>H-NMR spectral data)

CHNF0418

Pulse Sequence: s2pu1  
 UNITYplus-400 "unity400"  
 Date: Aug 25 2023  
 Solvent: CDCl<sub>3</sub>  
 Ambient temperature  
 Total 32 repetitions

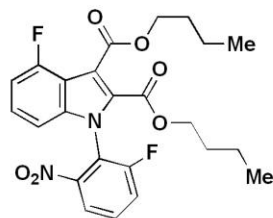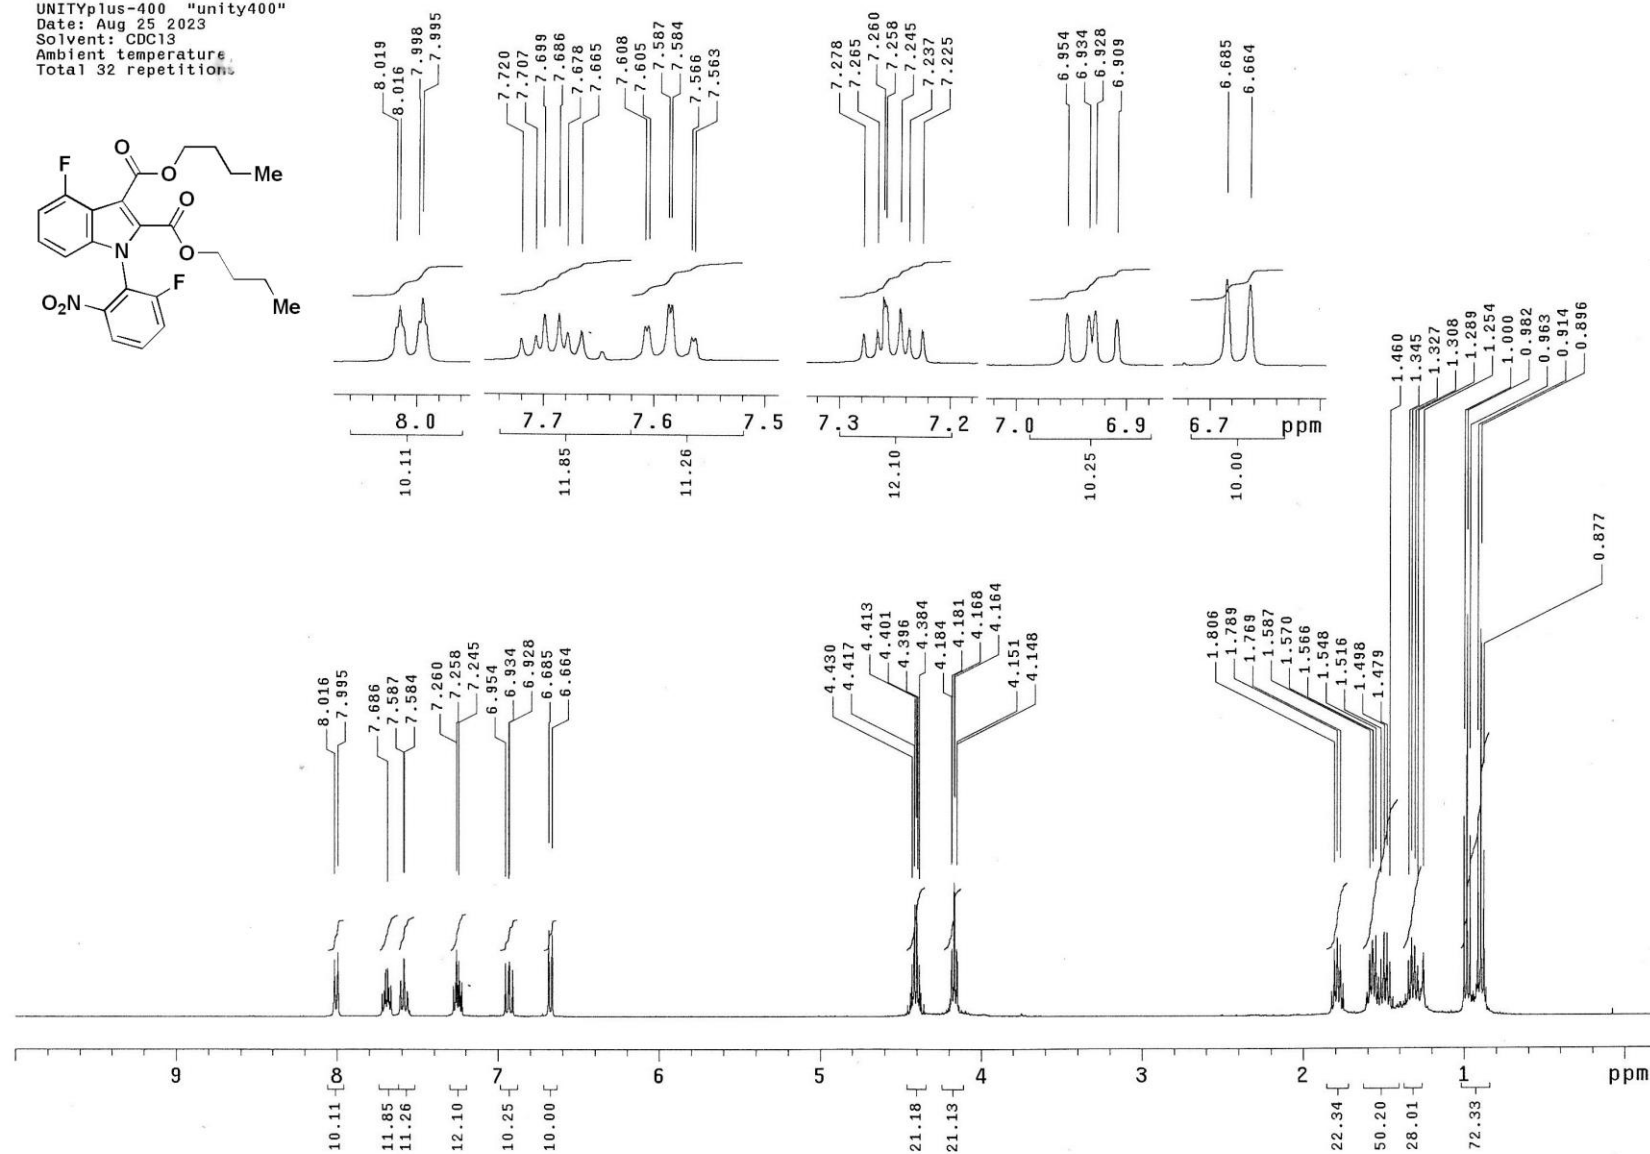

# Compound 4p (<sup>13</sup>C-NMR spectral data)

CHNF0418

Pulse Sequence: s2pu1  
 UNITYplus-400 "unity400"  
 Date: Aug 25 2023  
 Solvent: CDCl<sub>3</sub>  
 Ambient temperature  
 Total 1888 repetitions

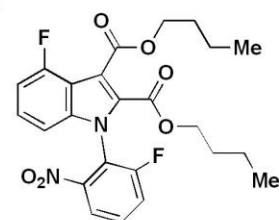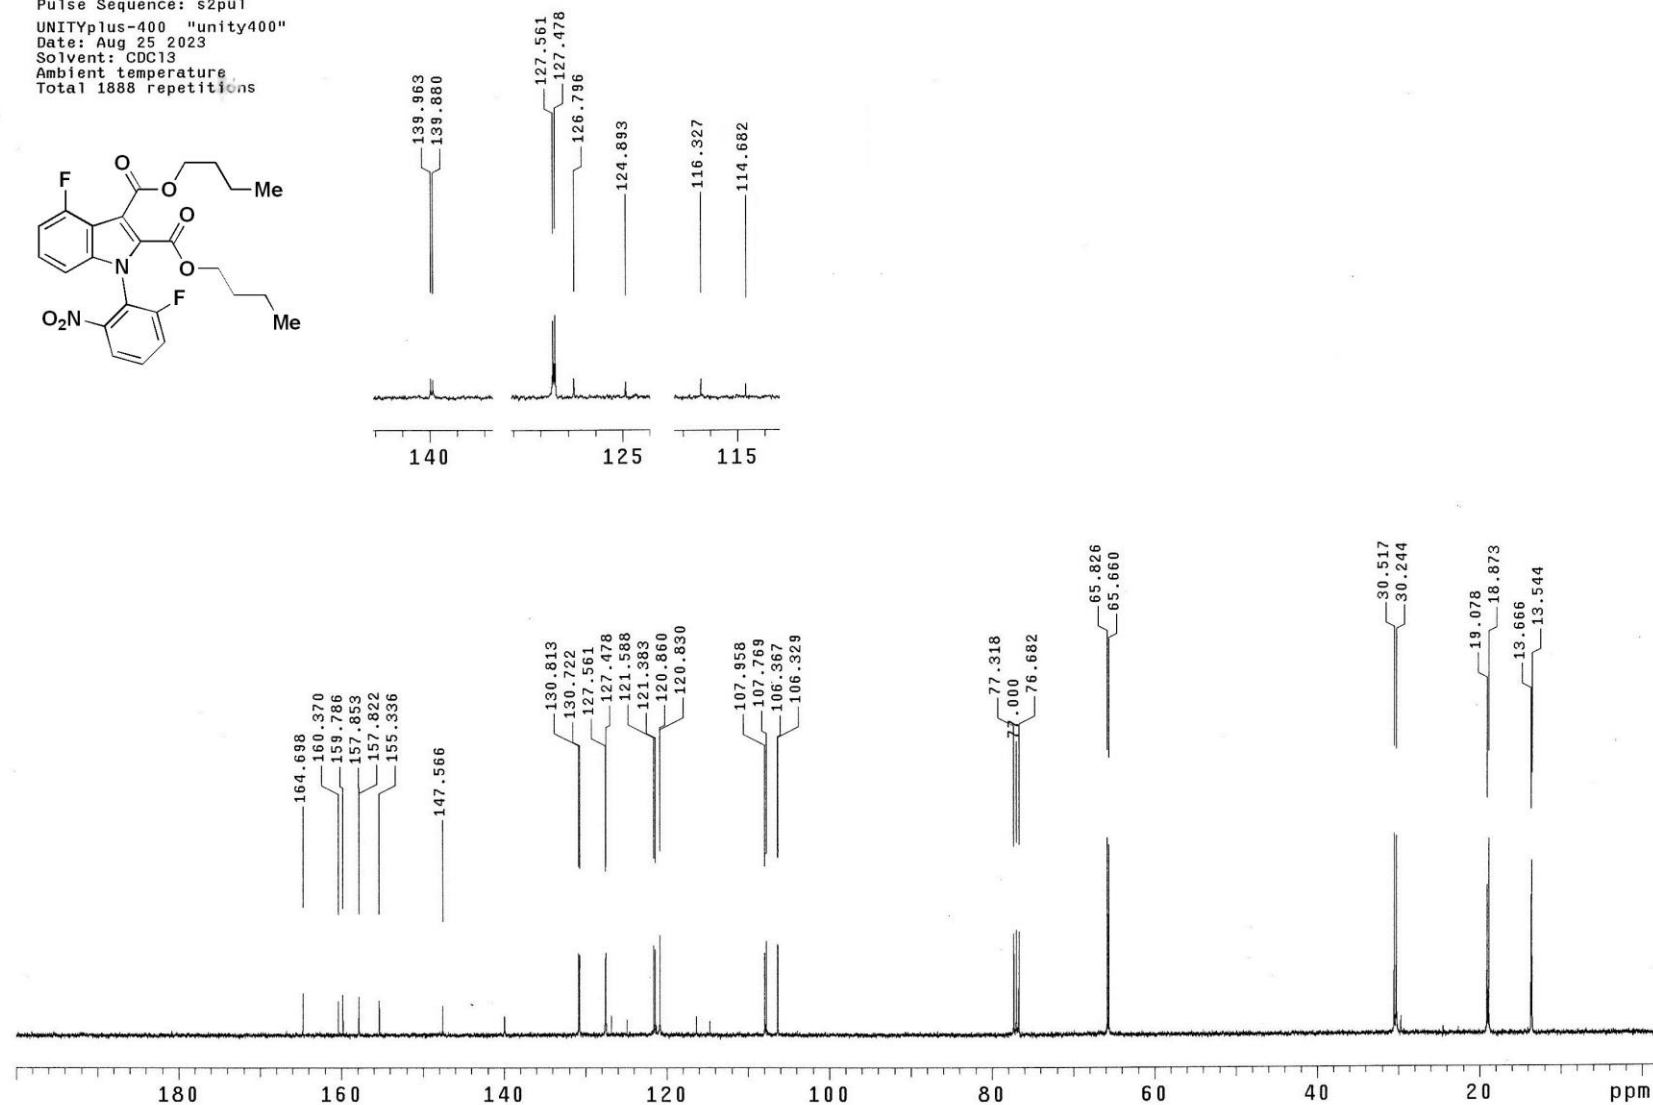

# Compound 4p (<sup>19</sup>F-NMR spectral data)

4p

Pulse Sequence: s2pu]  
Mercury-400BB "MerPlus400"  
Date: Jan 17 2024  
Solvent: cdcl3  
Ambient temperature  
Total 128 repetitions

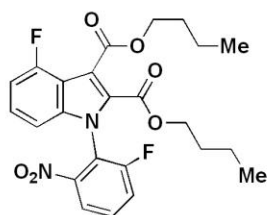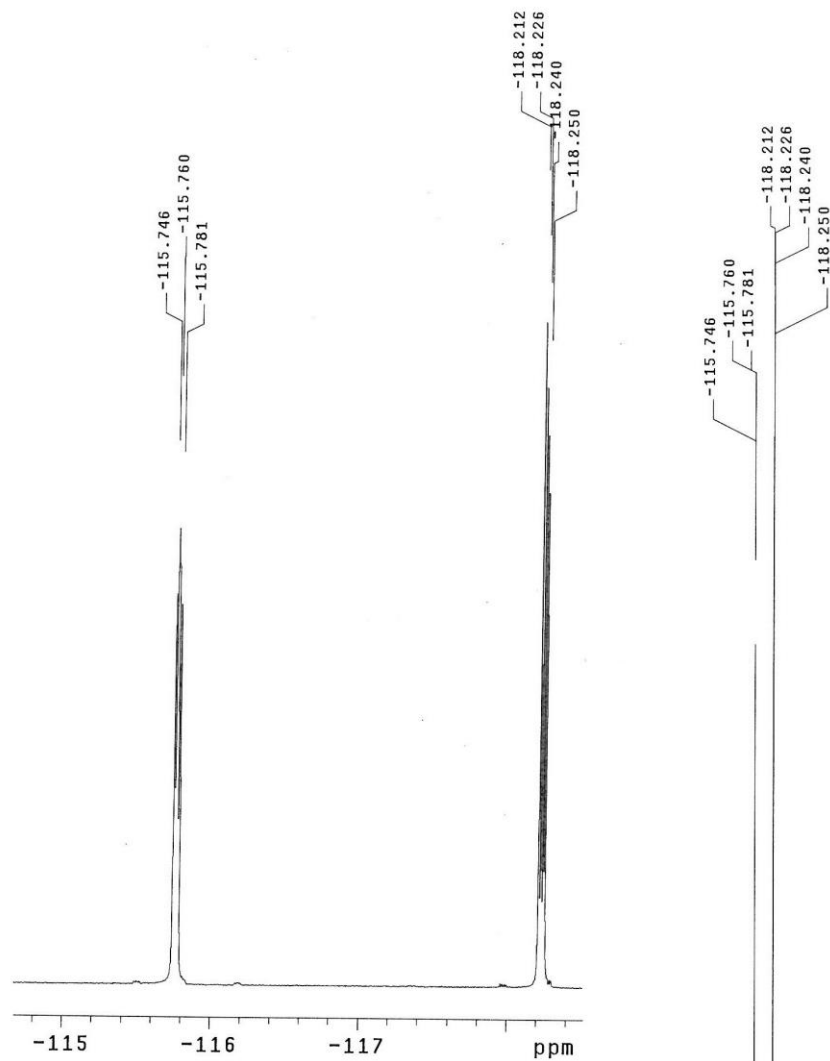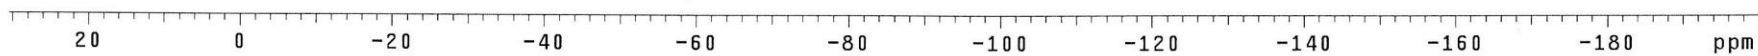



# Compound 4q (<sup>1</sup>H-NMR spectral data)

CHNF0420

Pulse Sequence: s2pu1  
 UNITYplus-400 "unity400"  
 Date: Aug 21 2023  
 Solvent: CDCl<sub>3</sub>  
 Ambient temperature  
 Total 32 repetition

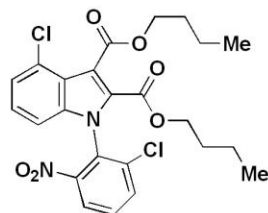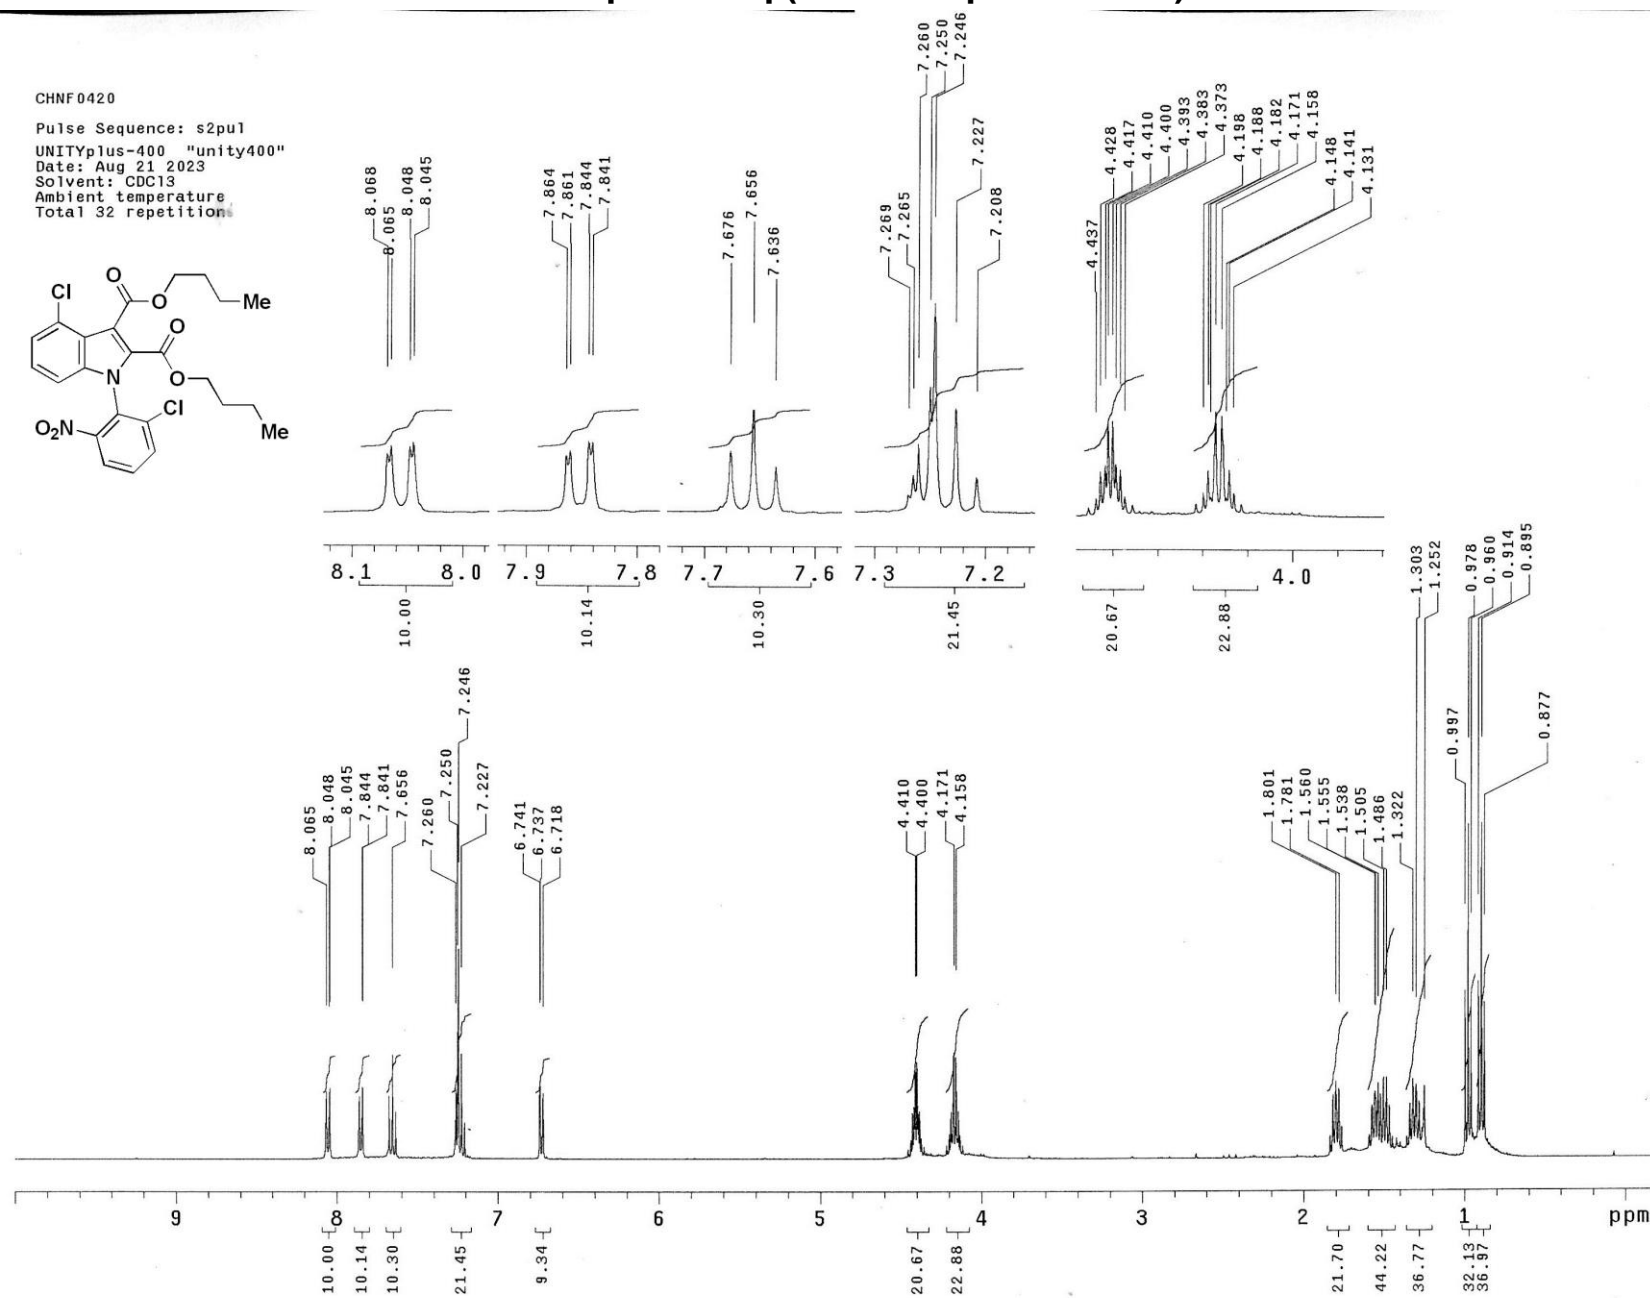

# Compound 4q (<sup>13</sup>C-NMR spectral data)

CHNF0420

Pulse Sequence: s2pu1  
 UNITYplus-400 "unity400"  
 Date: Aug 21 2023  
 Solvent: CDCl<sub>3</sub>  
 Ambient temperature  
 Total 1872 repetitions

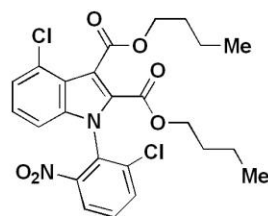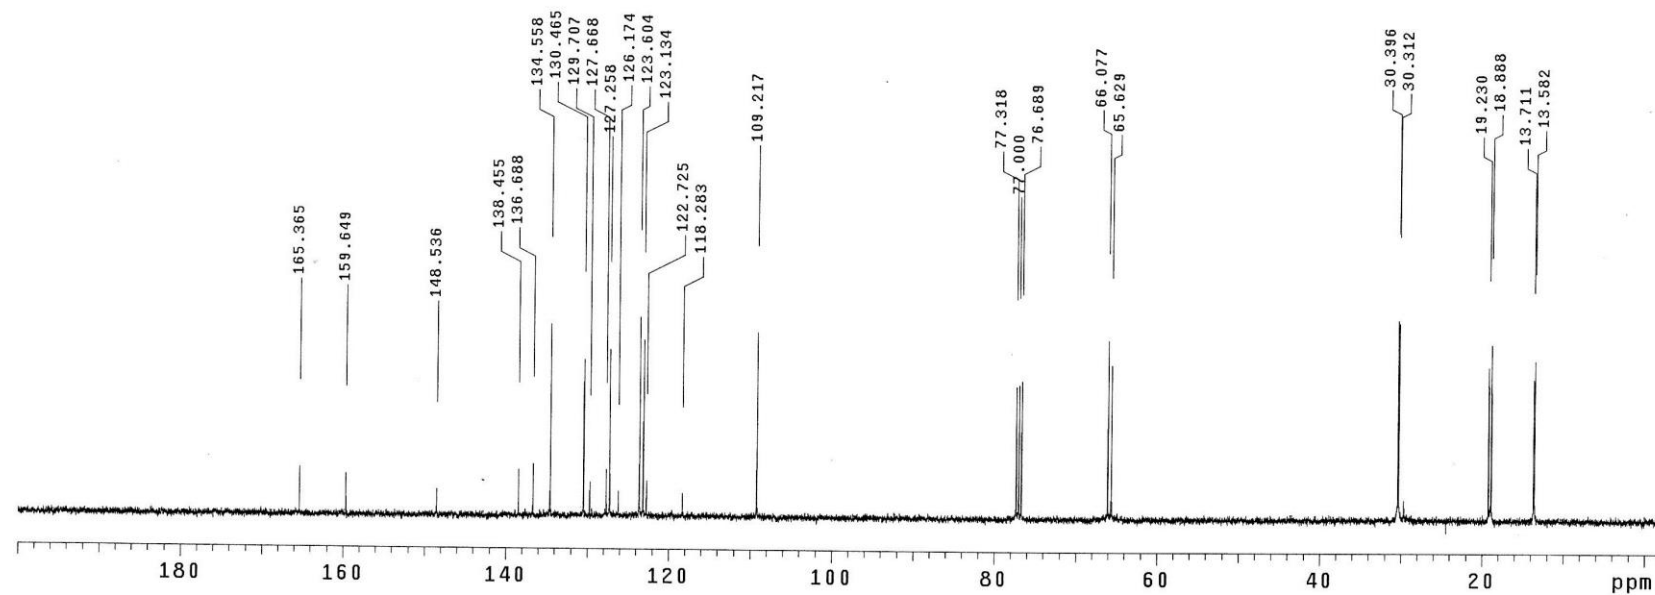

# Compound 4r (<sup>1</sup>H-NMR spectral data)

CHNF0826

Pulse Sequence: s2pu1  
 UNITYplus-400 "unity400"  
 Date: Aug 28 2023  
 Solvent: CDCl<sub>3</sub>  
 Ambient temperature  
 Total 32 repetitions

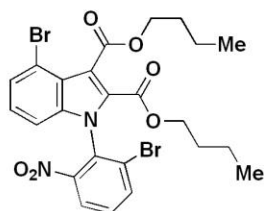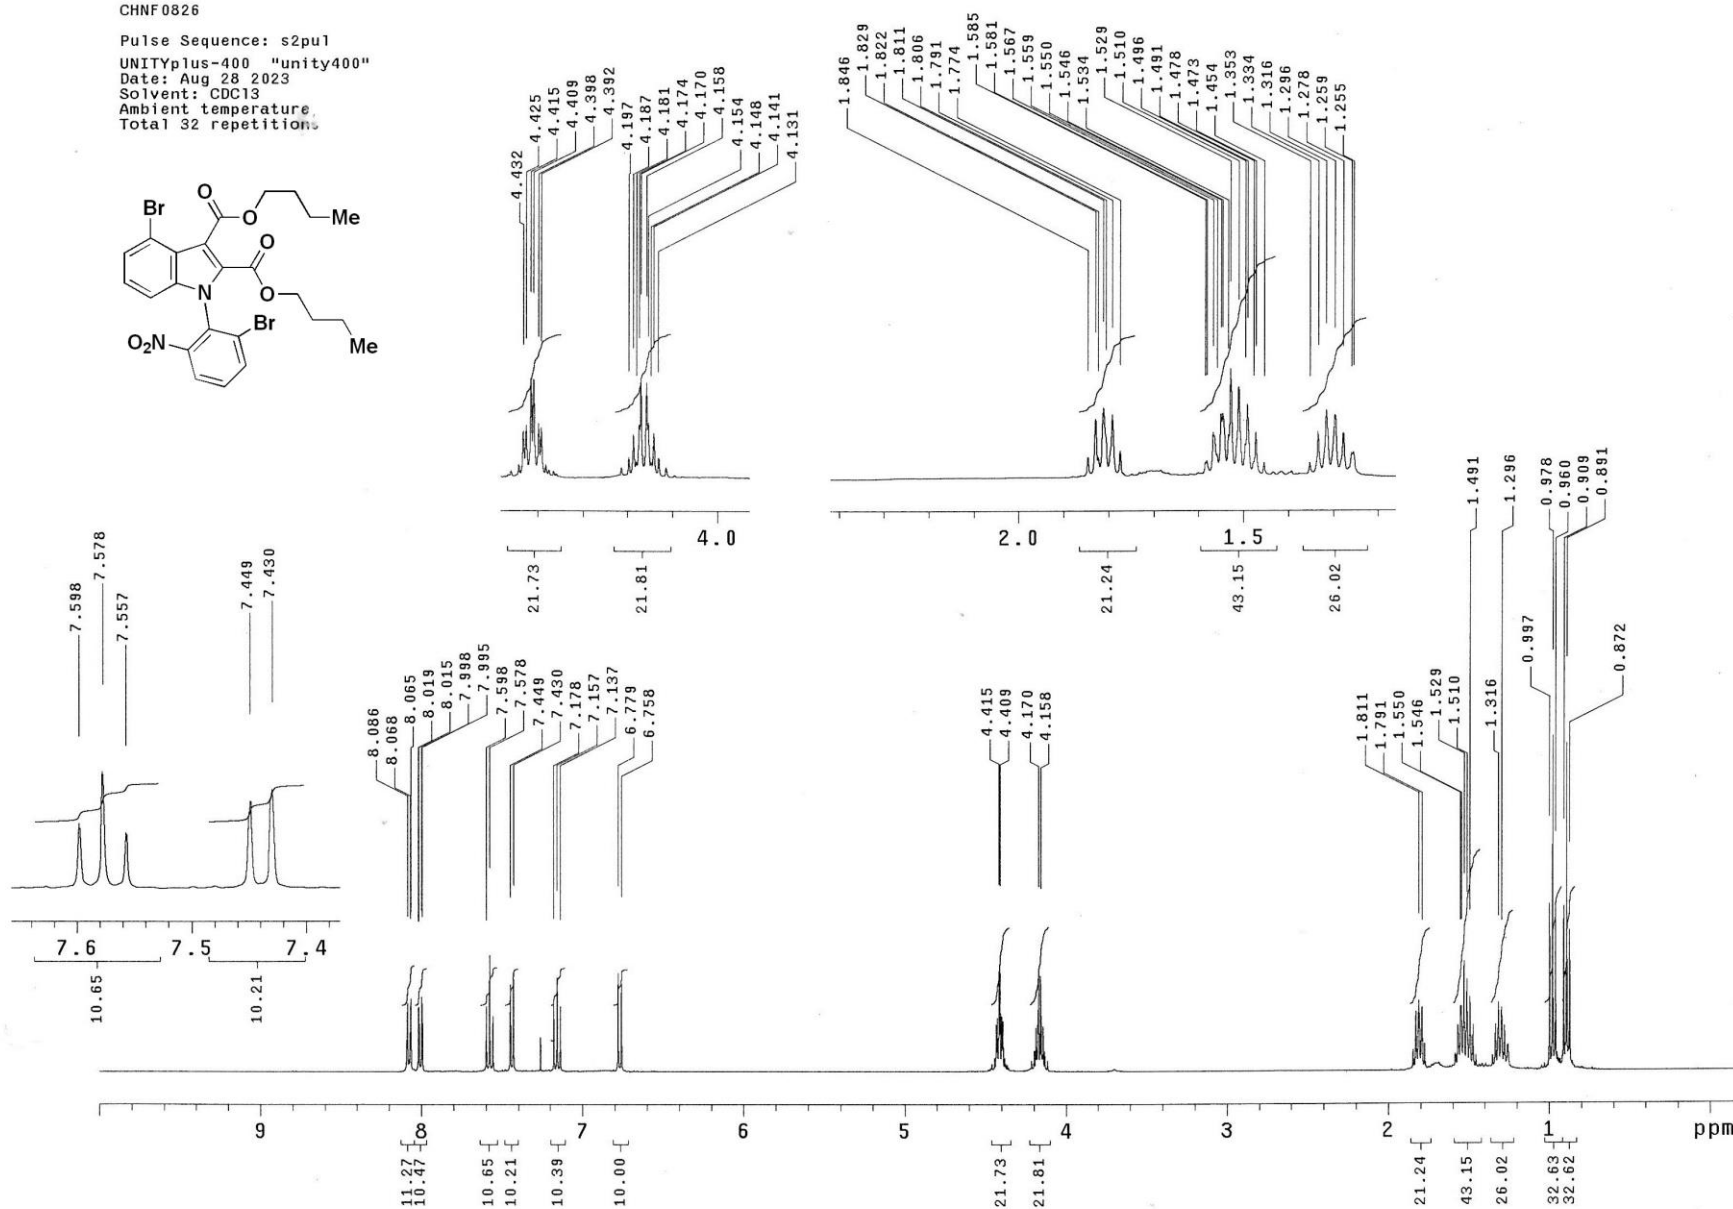

# Compound 4r (<sup>13</sup>C-NMR spectral data)

CHNF0826

Pulse Sequence: s2pu1  
 UNITYplus-400 "unity400"  
 Date: Aug 28 2023  
 Solvent: CDCl<sub>3</sub>  
 Ambient temperature  
 Total 2256 repetitions

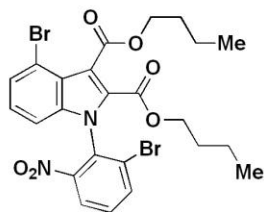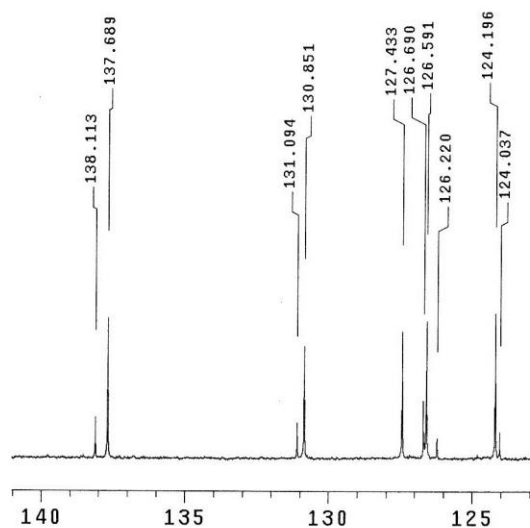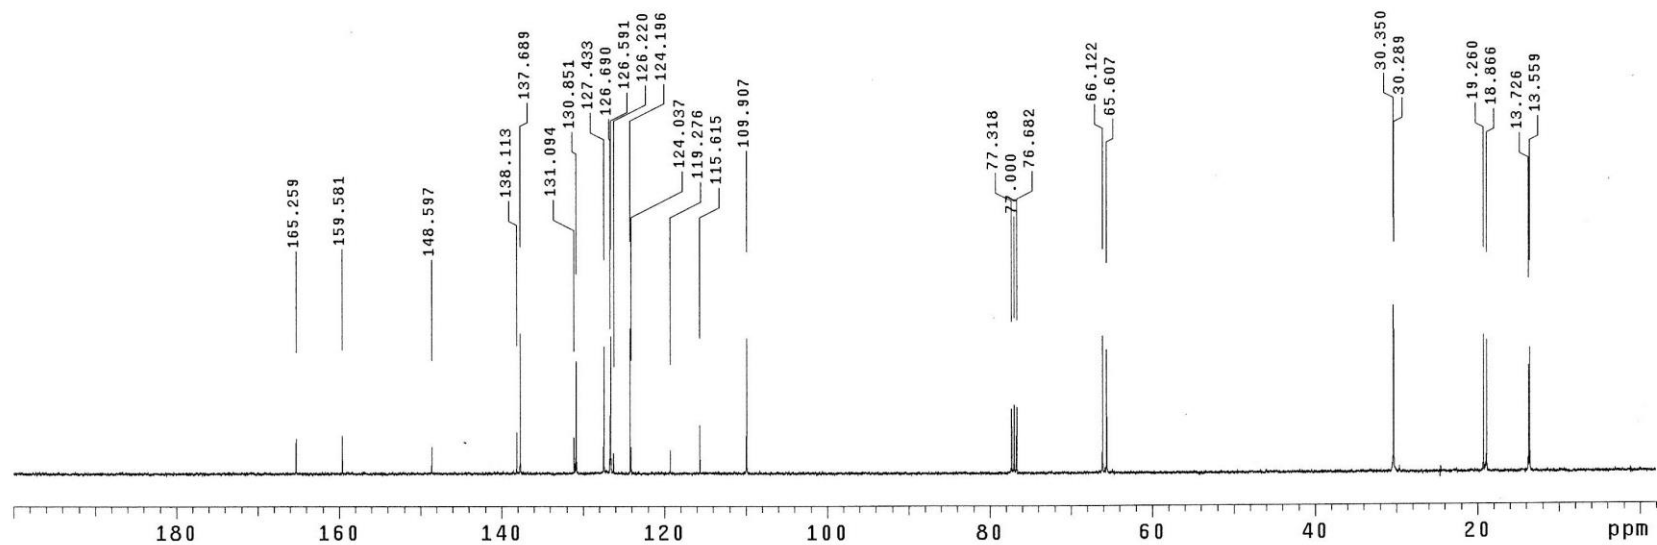

# Compound 4s (<sup>1</sup>H-NMR spectral data)

CHNF0831

Pulse Sequence: s2pu1  
 UNITYplus-400 "unity400"  
 Date: Aug 31 2023  
 Solvent: CDCl<sub>3</sub>  
 Ambient temperature  
 Total 64 repetitions

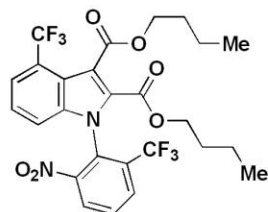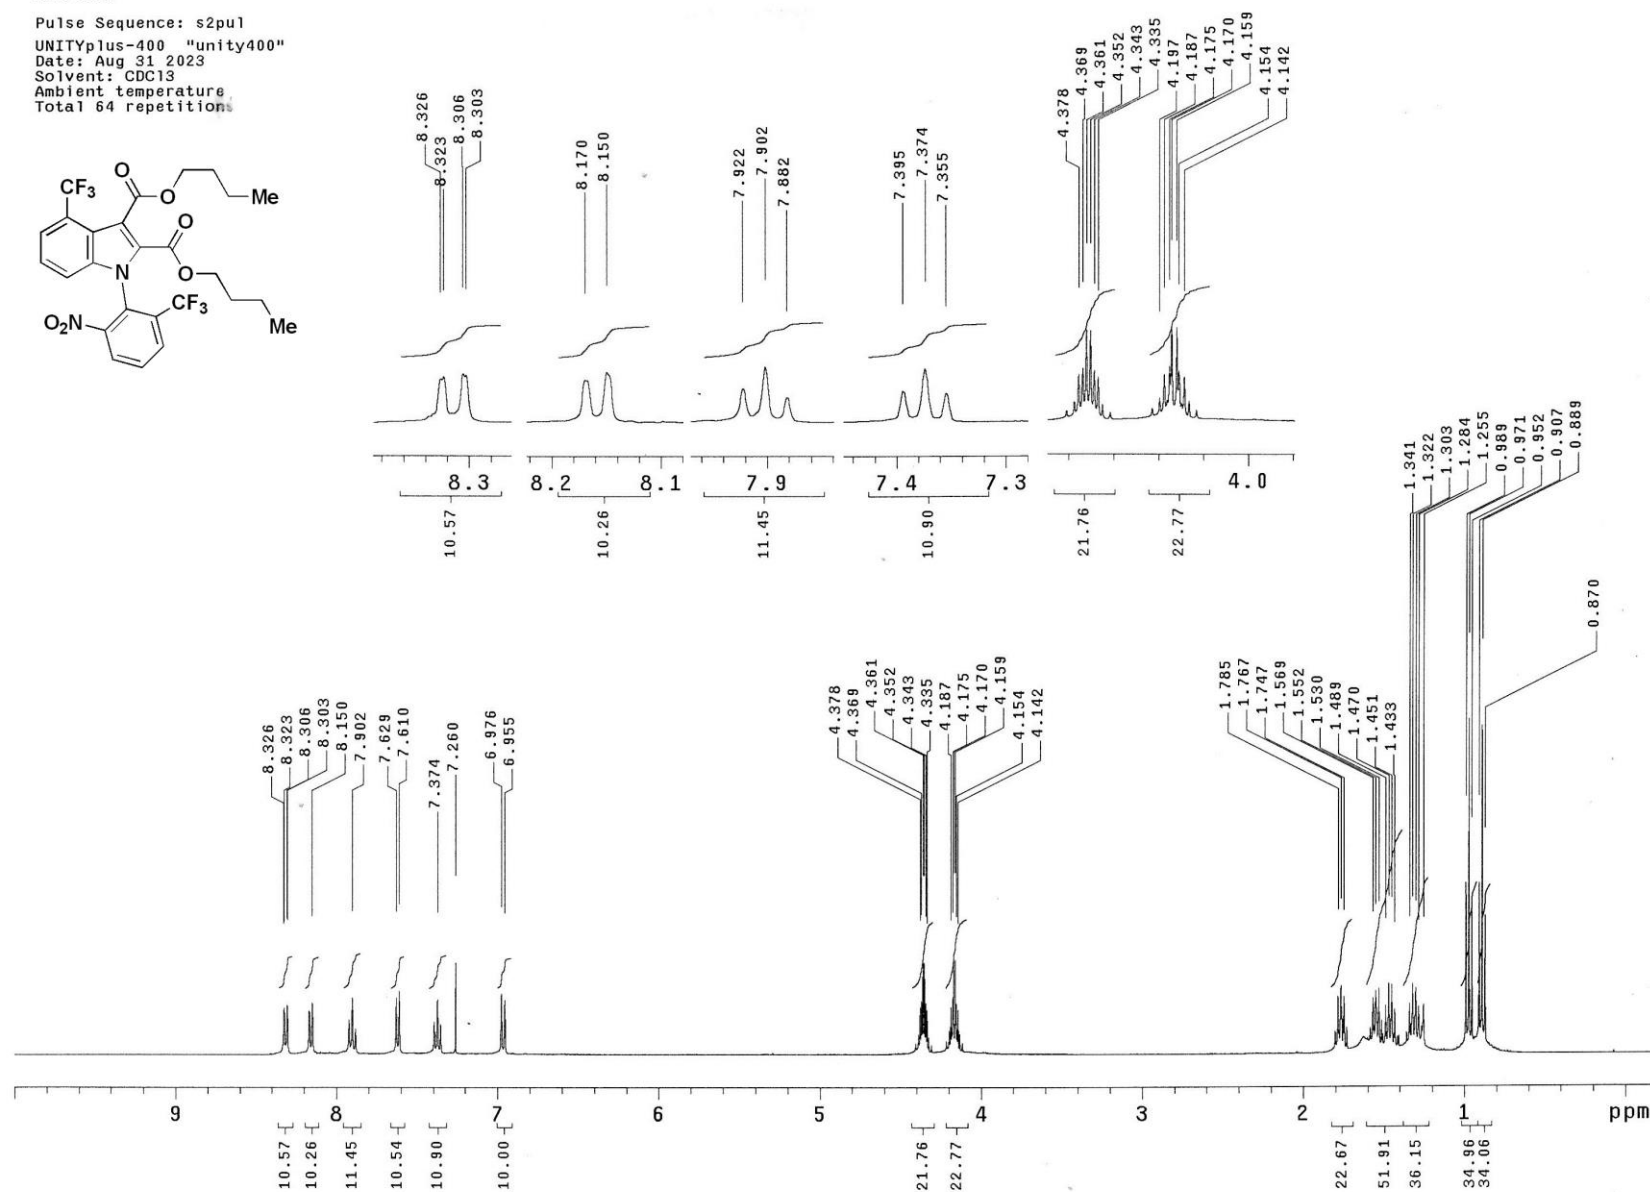

# Compound 4s (<sup>13</sup>C-NMR spectral data)

CHNF0831

Pulse Sequence: s2pu1  
 UNITYplus-400 "unity400"  
 Date: Aug 31 2023  
 Solvent: CDCl<sub>3</sub>  
 Ambient temperature  
 Total 4736 repetitions

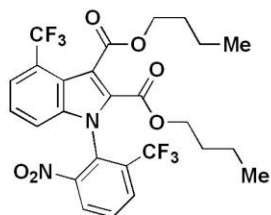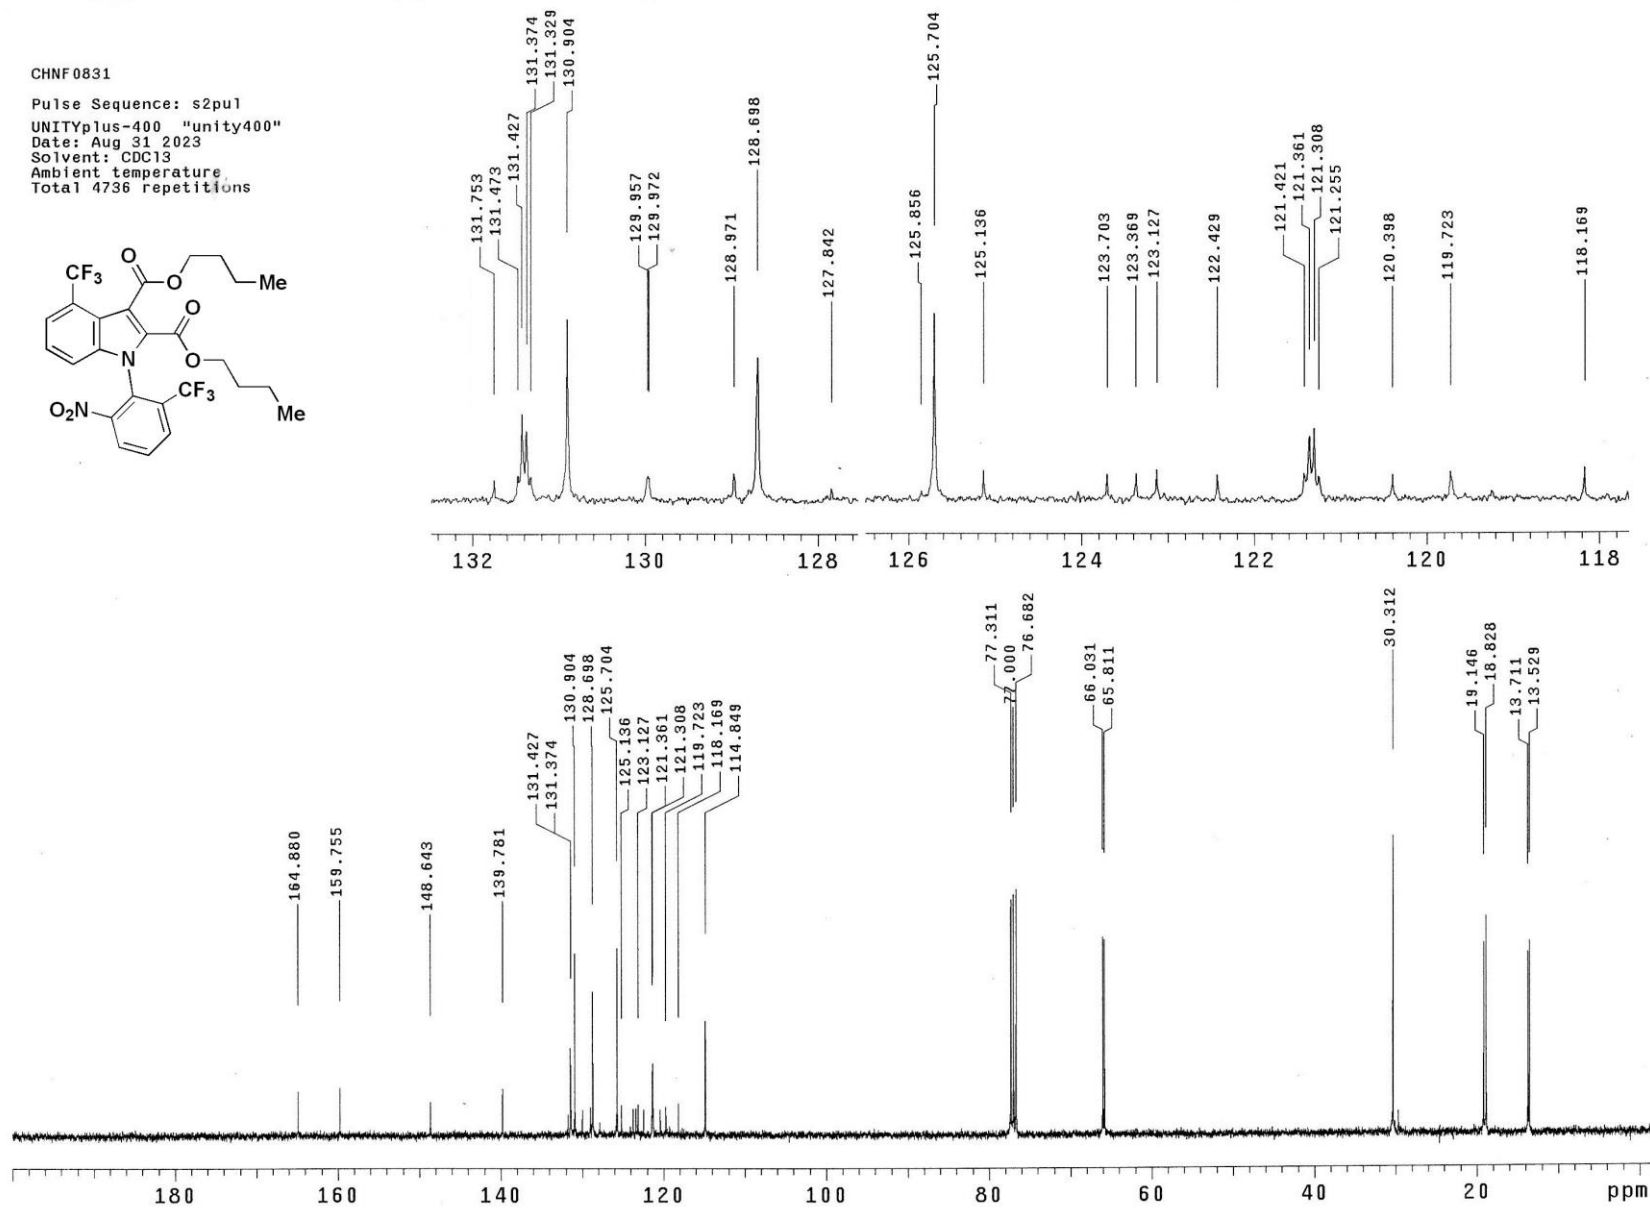

# Compound 4s (<sup>19</sup>F-NMR spectral data)

4s

Pulse Sequence: s2pu1  
Mercury-400BB "MerPlus400"  
Date: Jan 18 2024  
Solvent: cdcl3  
Ambient temperature  
Total 16 repetitions

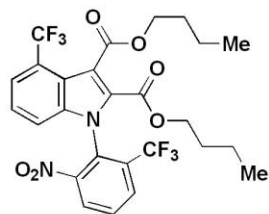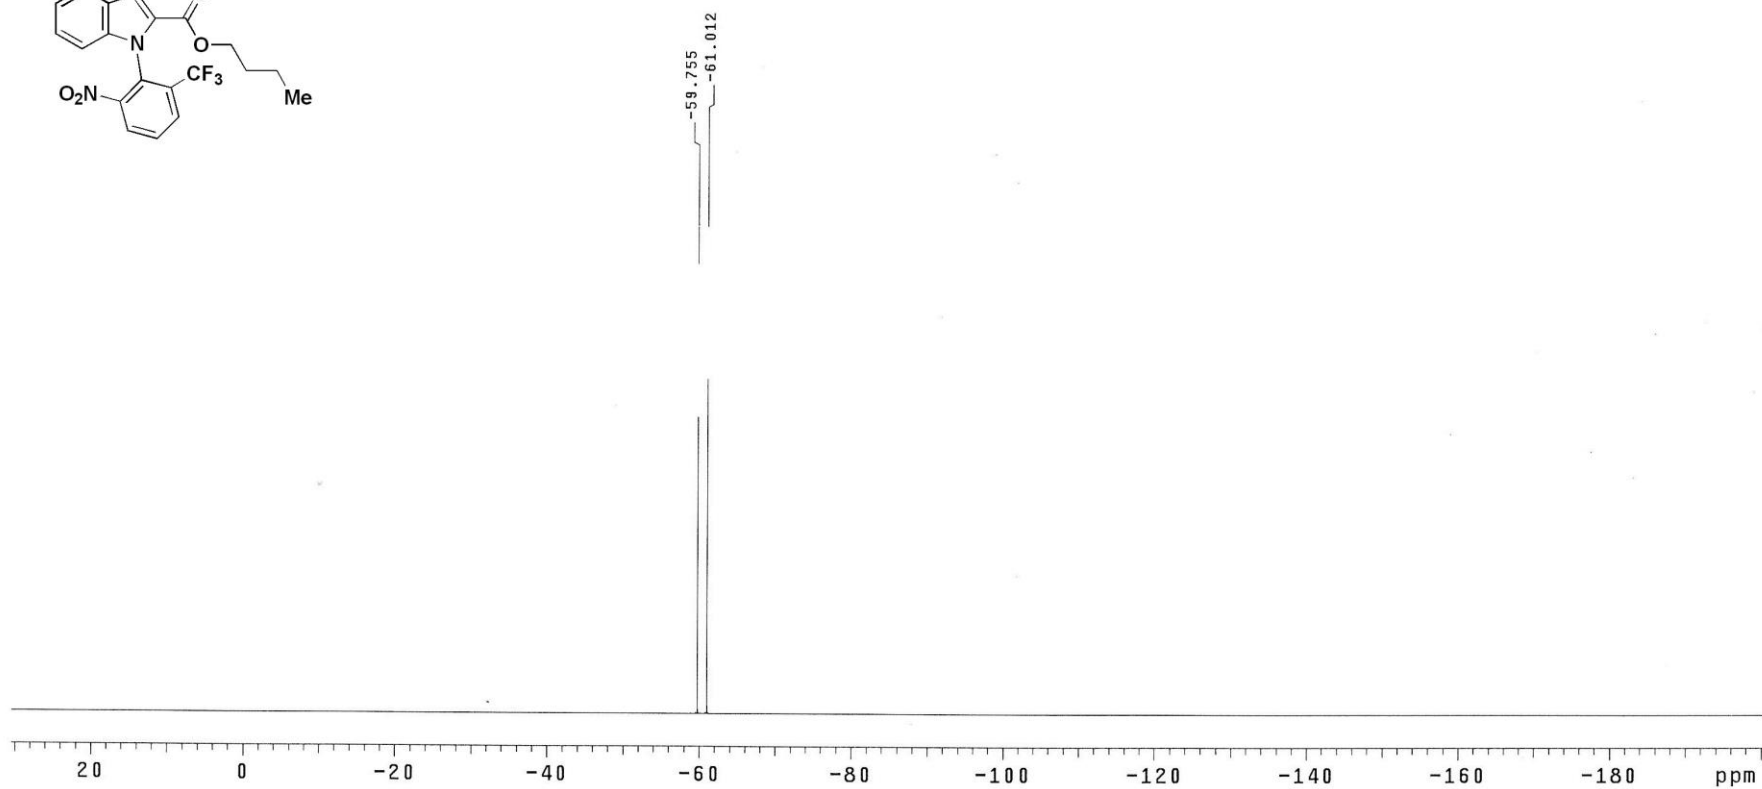

# Compound 4t (<sup>1</sup>H-NMR spectral data)

CHNF0925

Pulse Sequence: s2pu1  
 UNITYplus-400 "unity400"  
 Date: Sep 26 2023  
 Solvent: CDCl<sub>3</sub>  
 Ambient temperature  
 Total 32 repetitions

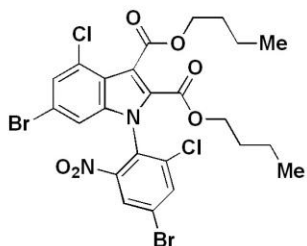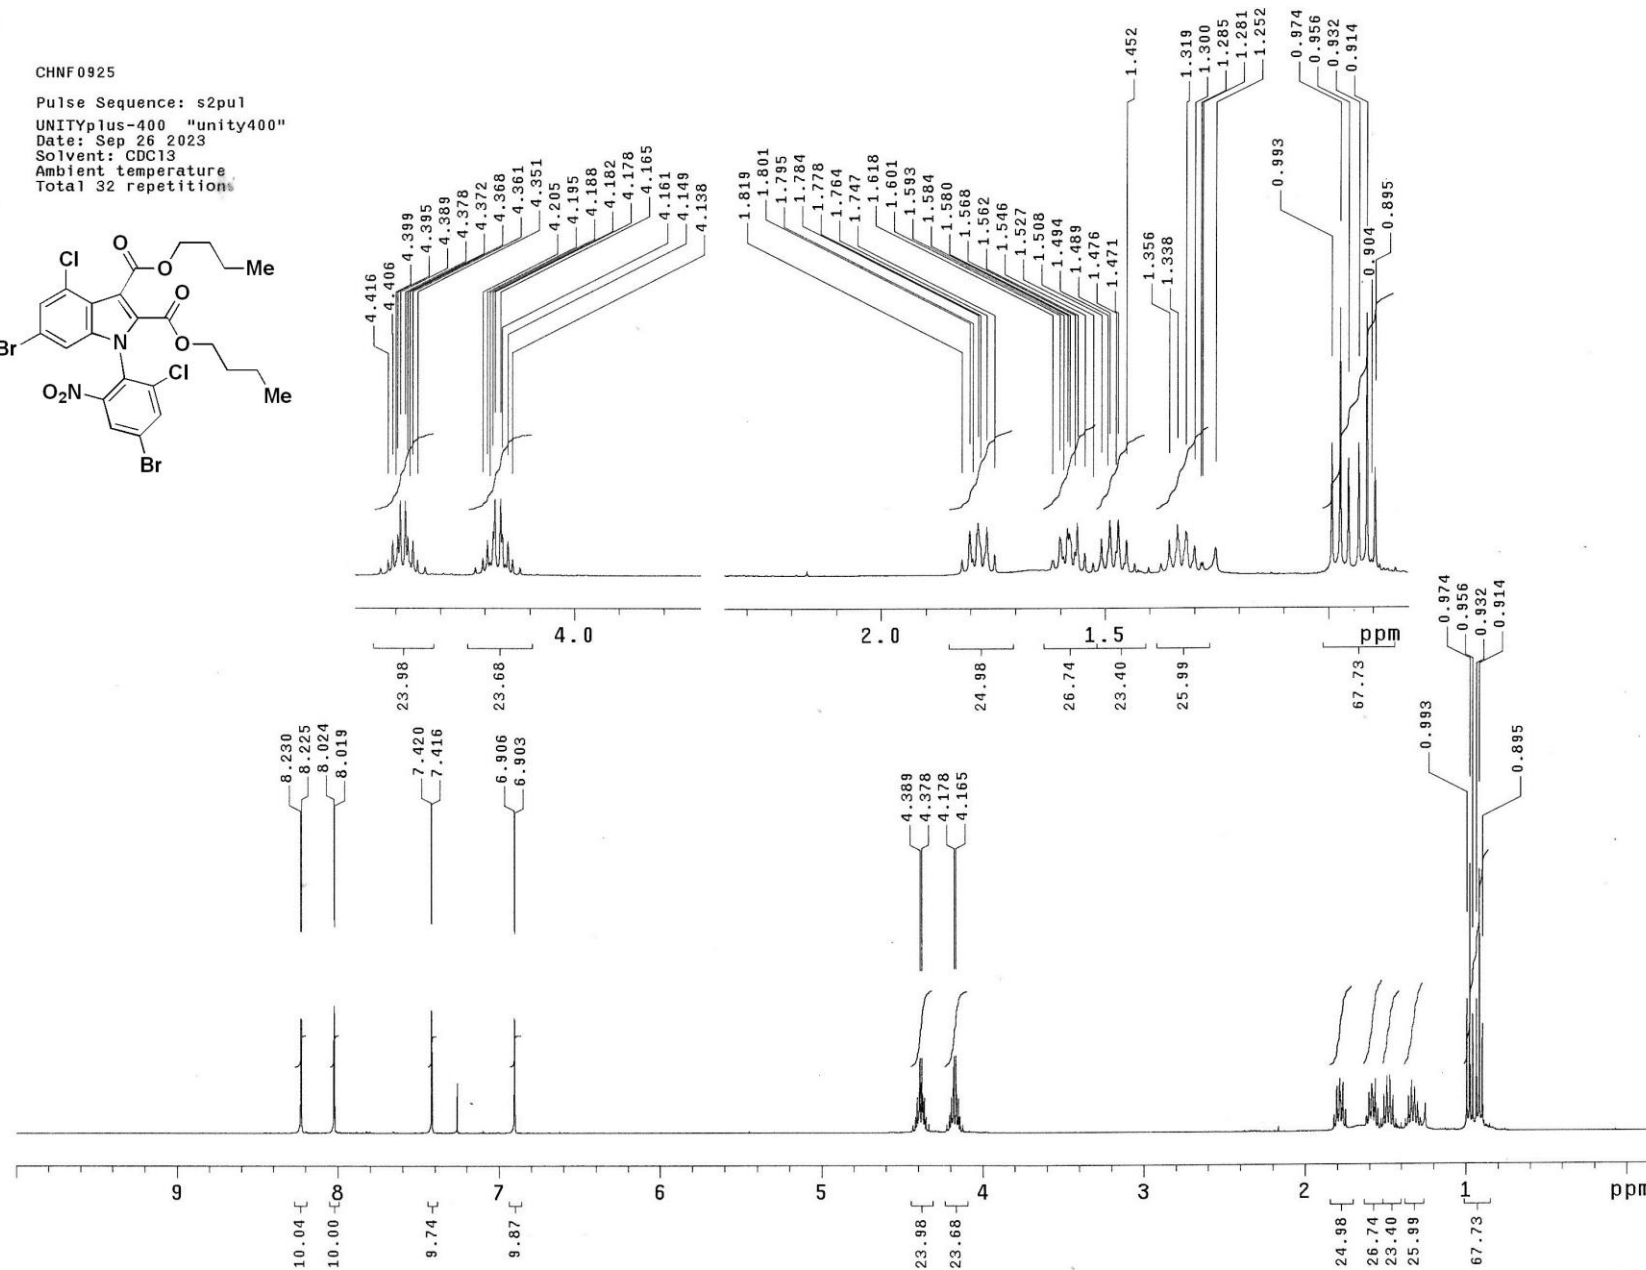



# Compound 4t (<sup>13</sup>C-NMR spectral data)

CHNF0925

Pulse Sequence: s2pu1  
 UNITYplus-400 "unity400"  
 Date: Sep 26 2023  
 Solvent: CDCl<sub>3</sub>  
 Ambient temperature  
 Total 1840 repetitions

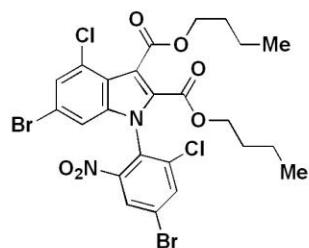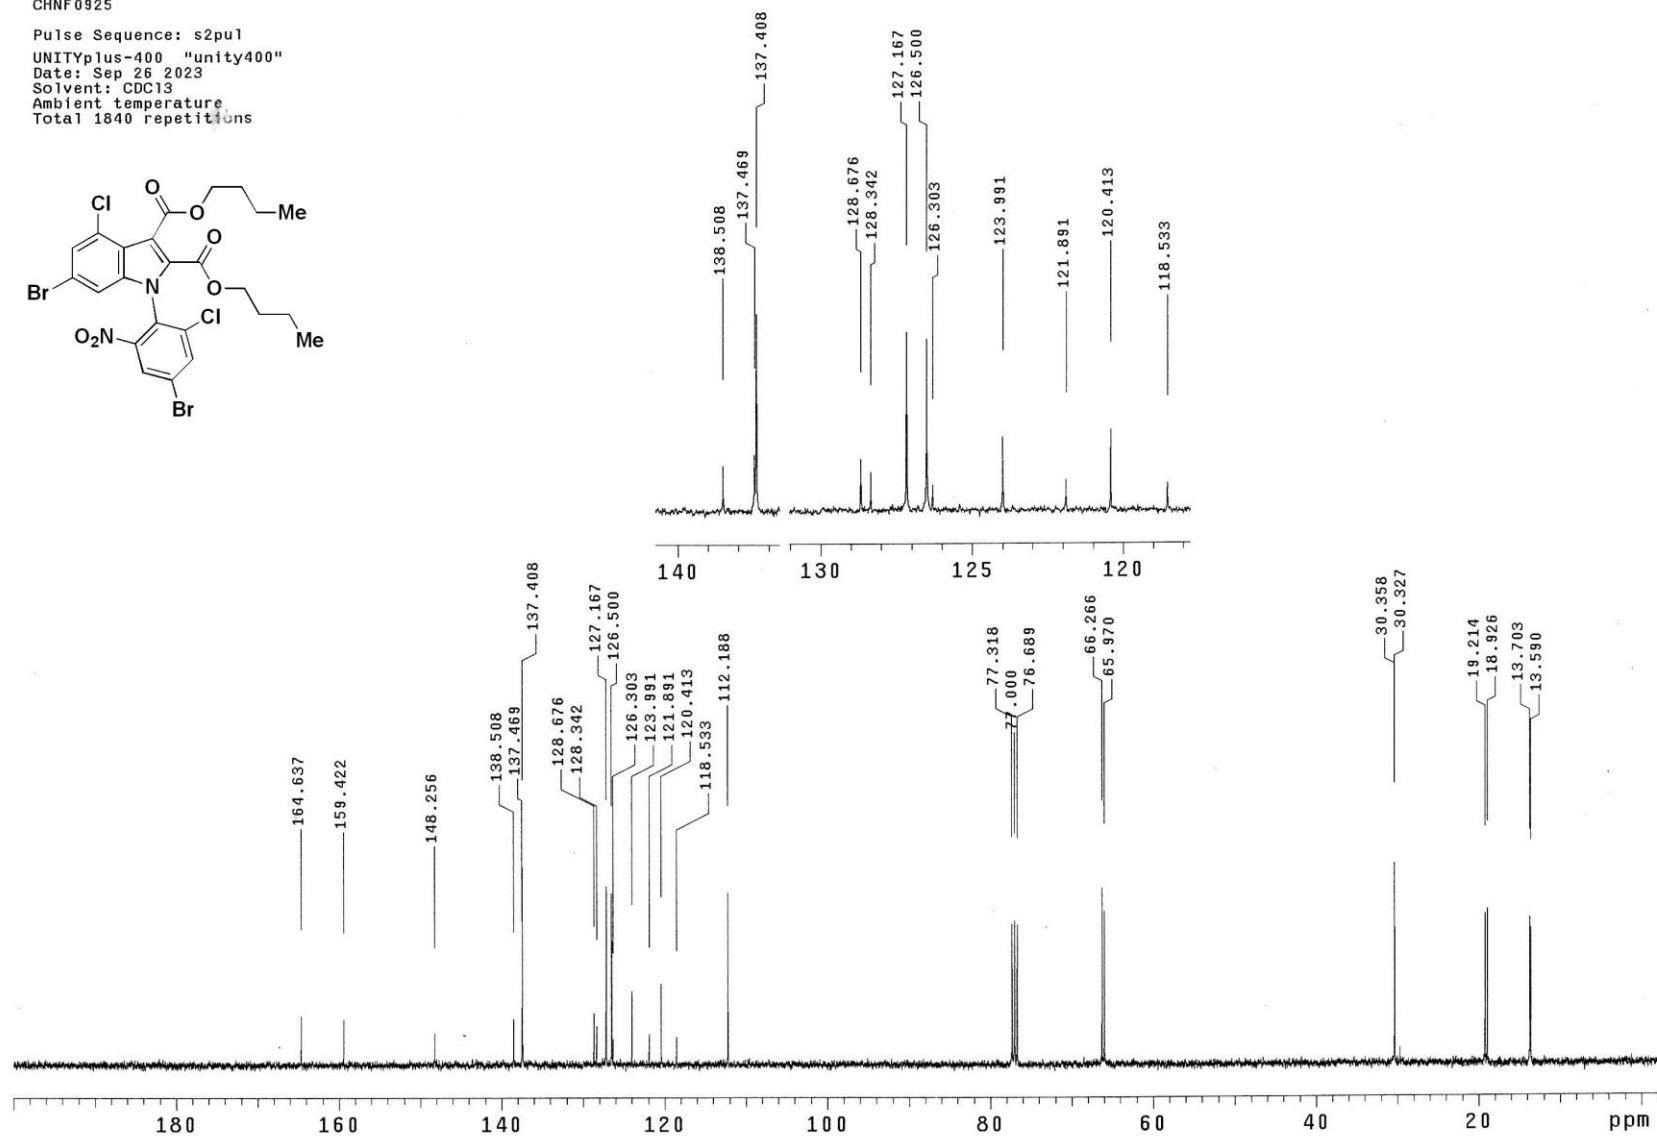

# Compound 4u (<sup>1</sup>H-NMR spectral data)

CHNF0511

Pulse Sequence: s2pu1  
 UNITYplus-400 "unity400"  
 Date: Aug 31 2023  
 Solvent: CDCl<sub>3</sub>  
 Ambient temperature  
 Total 32 repetitions

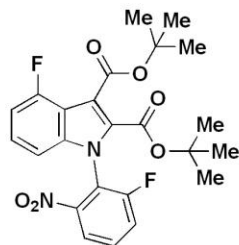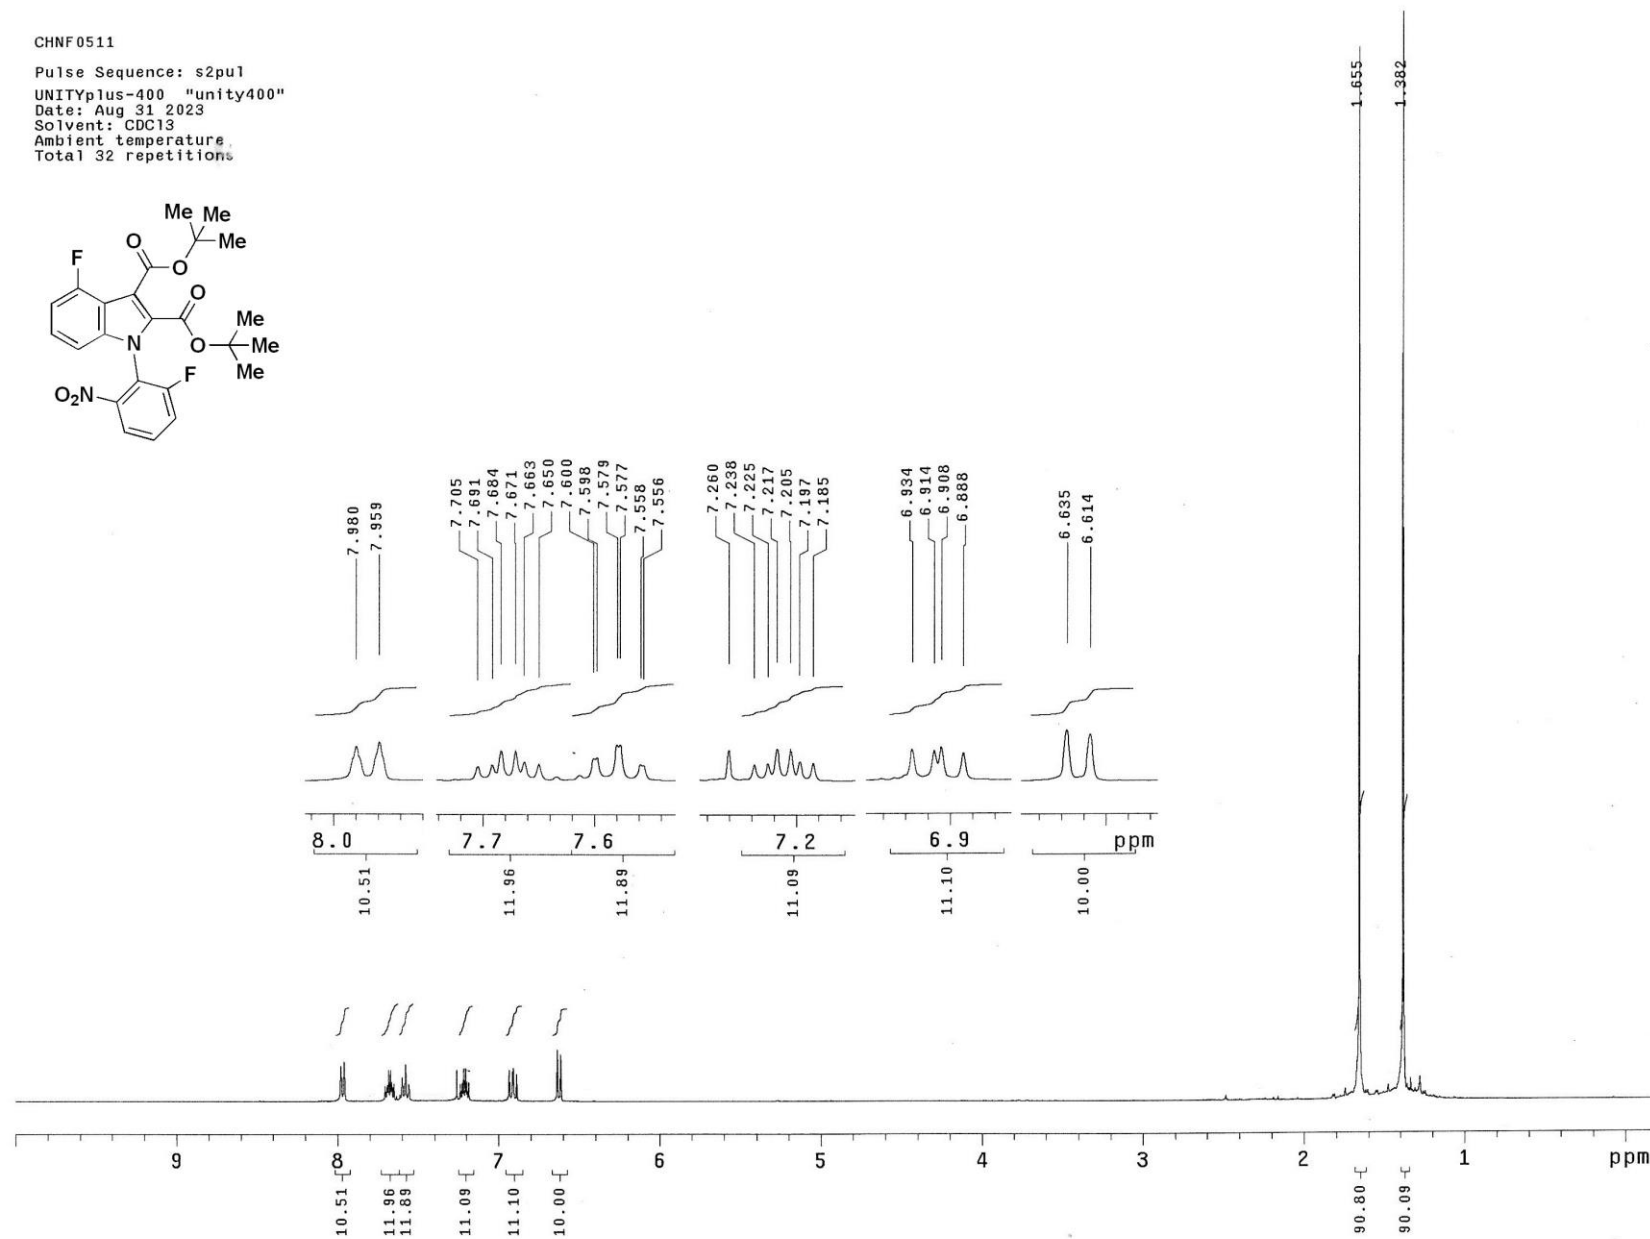

# Compound 4u (<sup>13</sup>C-NMR spectral data)

CHNF0511

Pulse Sequence: s2pu1  
 UNITYplus-400 "unity400"  
 Date: Aug 31 2023  
 Solvent: CDCl<sub>3</sub>  
 Ambient temperature  
 Total 3072 repetitions

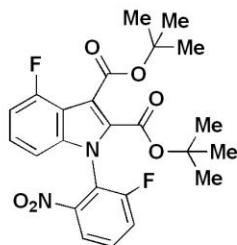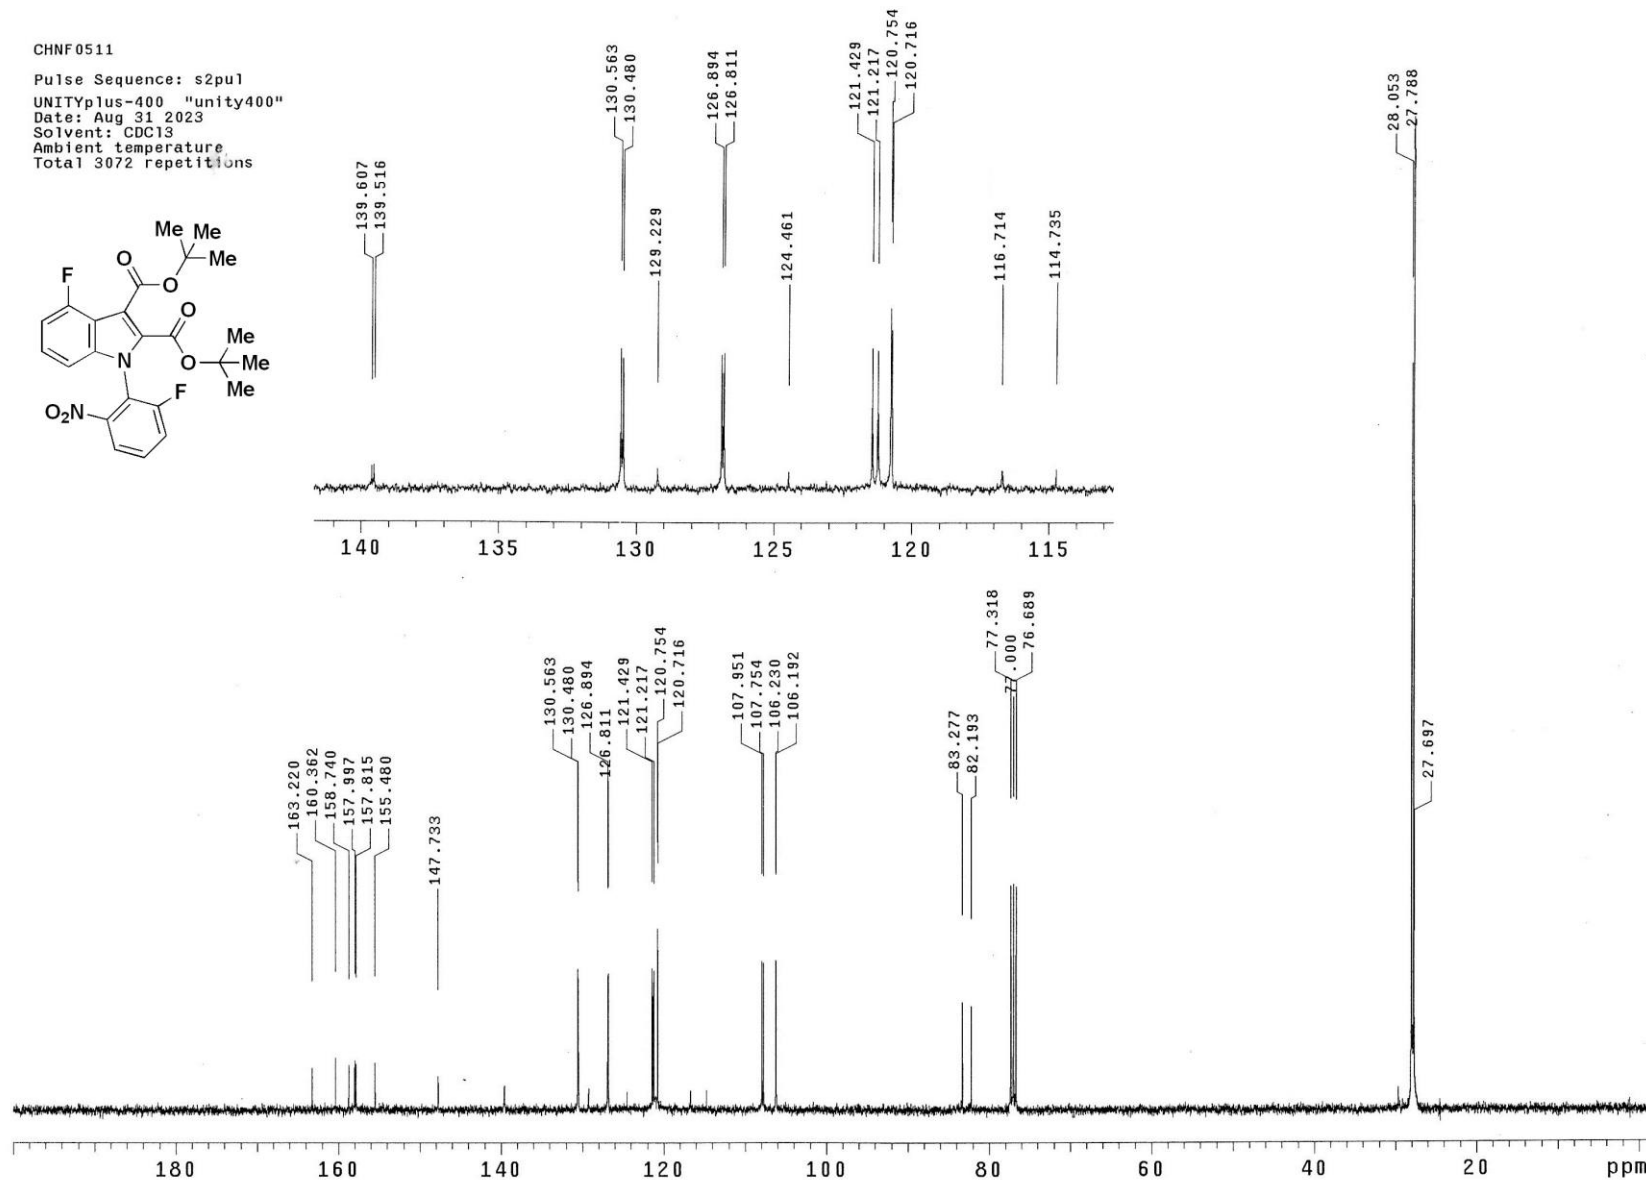

# Compound 4u (<sup>19</sup>F-NMR spectral data)

4u

Pulse Sequence: s2pu1,  
Mercury-400BB "MerPlus400"  
Date: Jan 17 2024  
Solvent: cdcl3  
Ambient temperature  
Total 384 repetitions

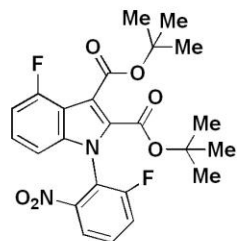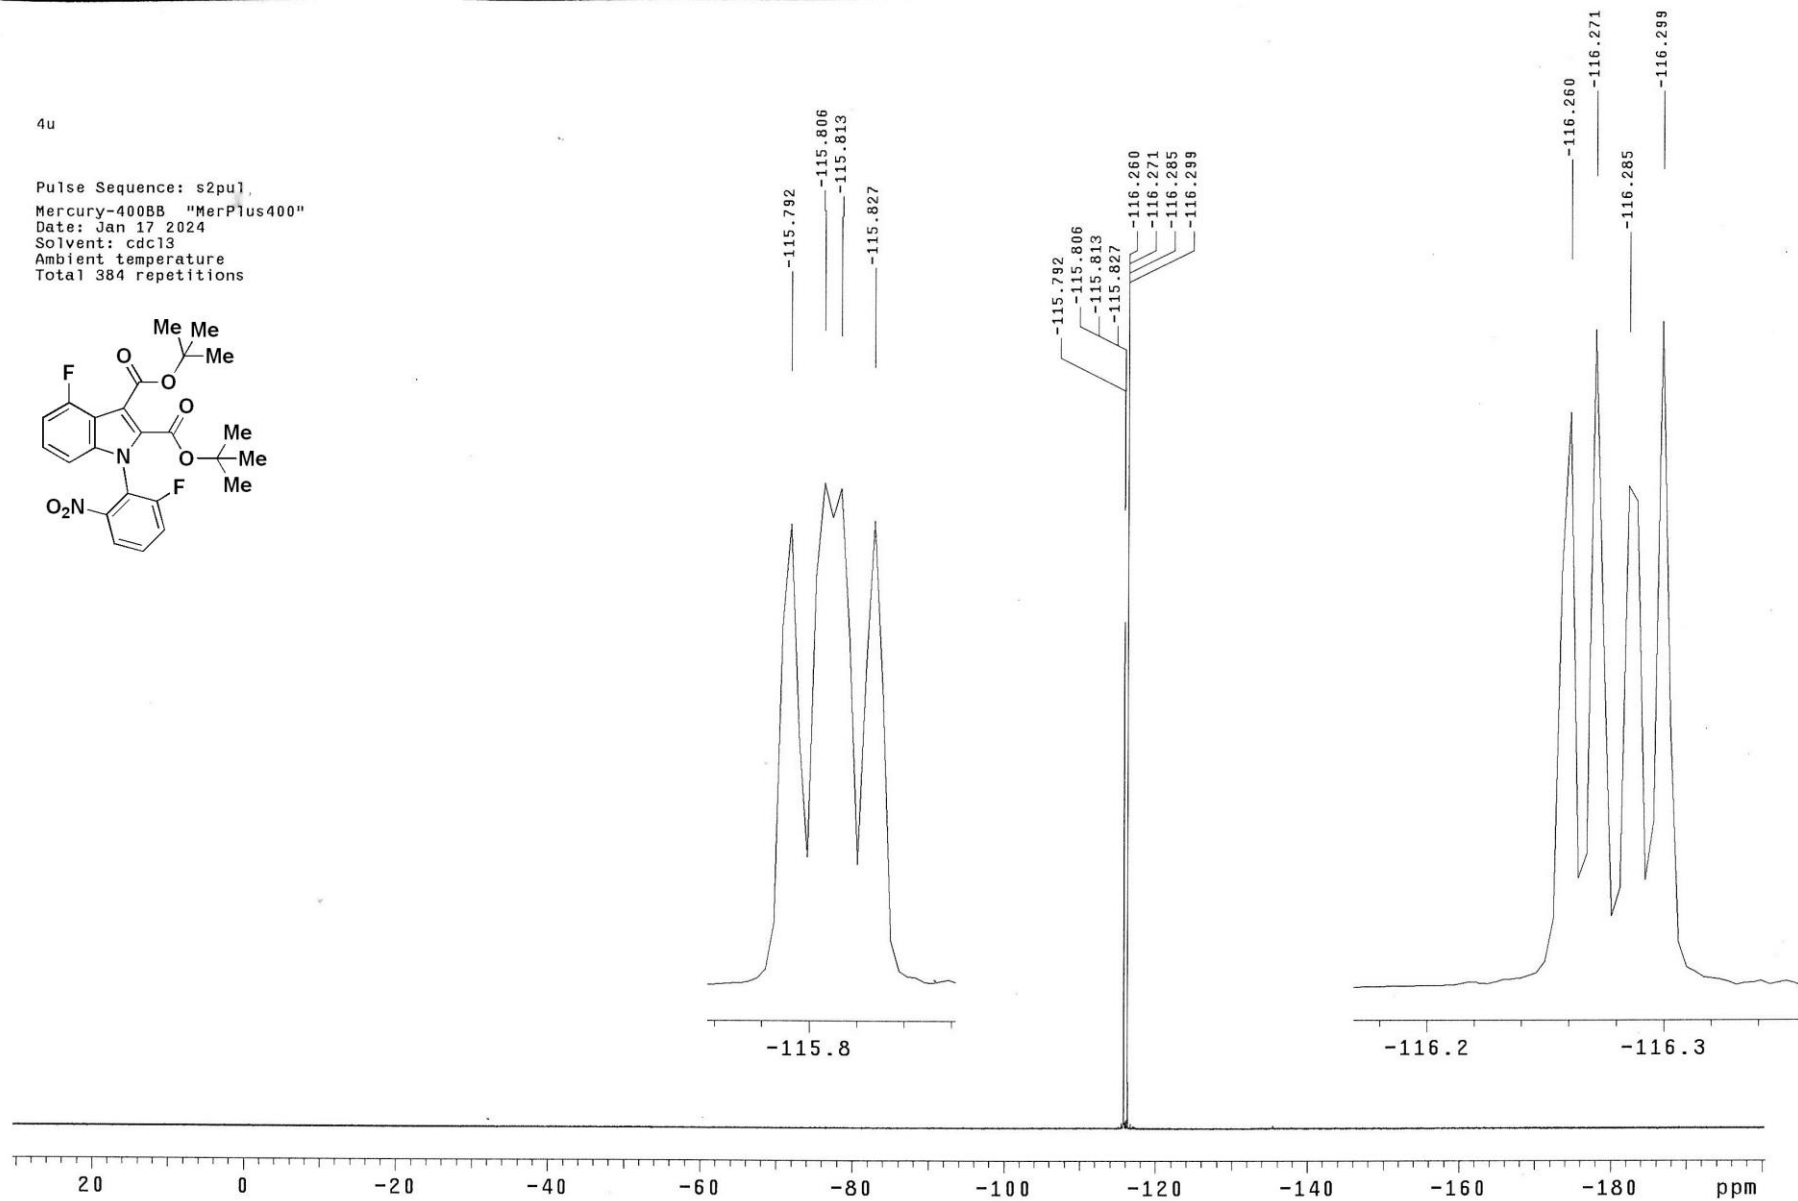

# Compound 4v (<sup>1</sup>H-NMR spectral data)

CHNF0512

Pulse Sequence: s2pu1  
 UNITYplus-400 "unity400"  
 Date: Aug 28 2023  
 Solvent: CDCl<sub>3</sub>  
 Ambient temperature  
 Total 32 repetitions

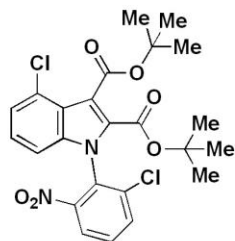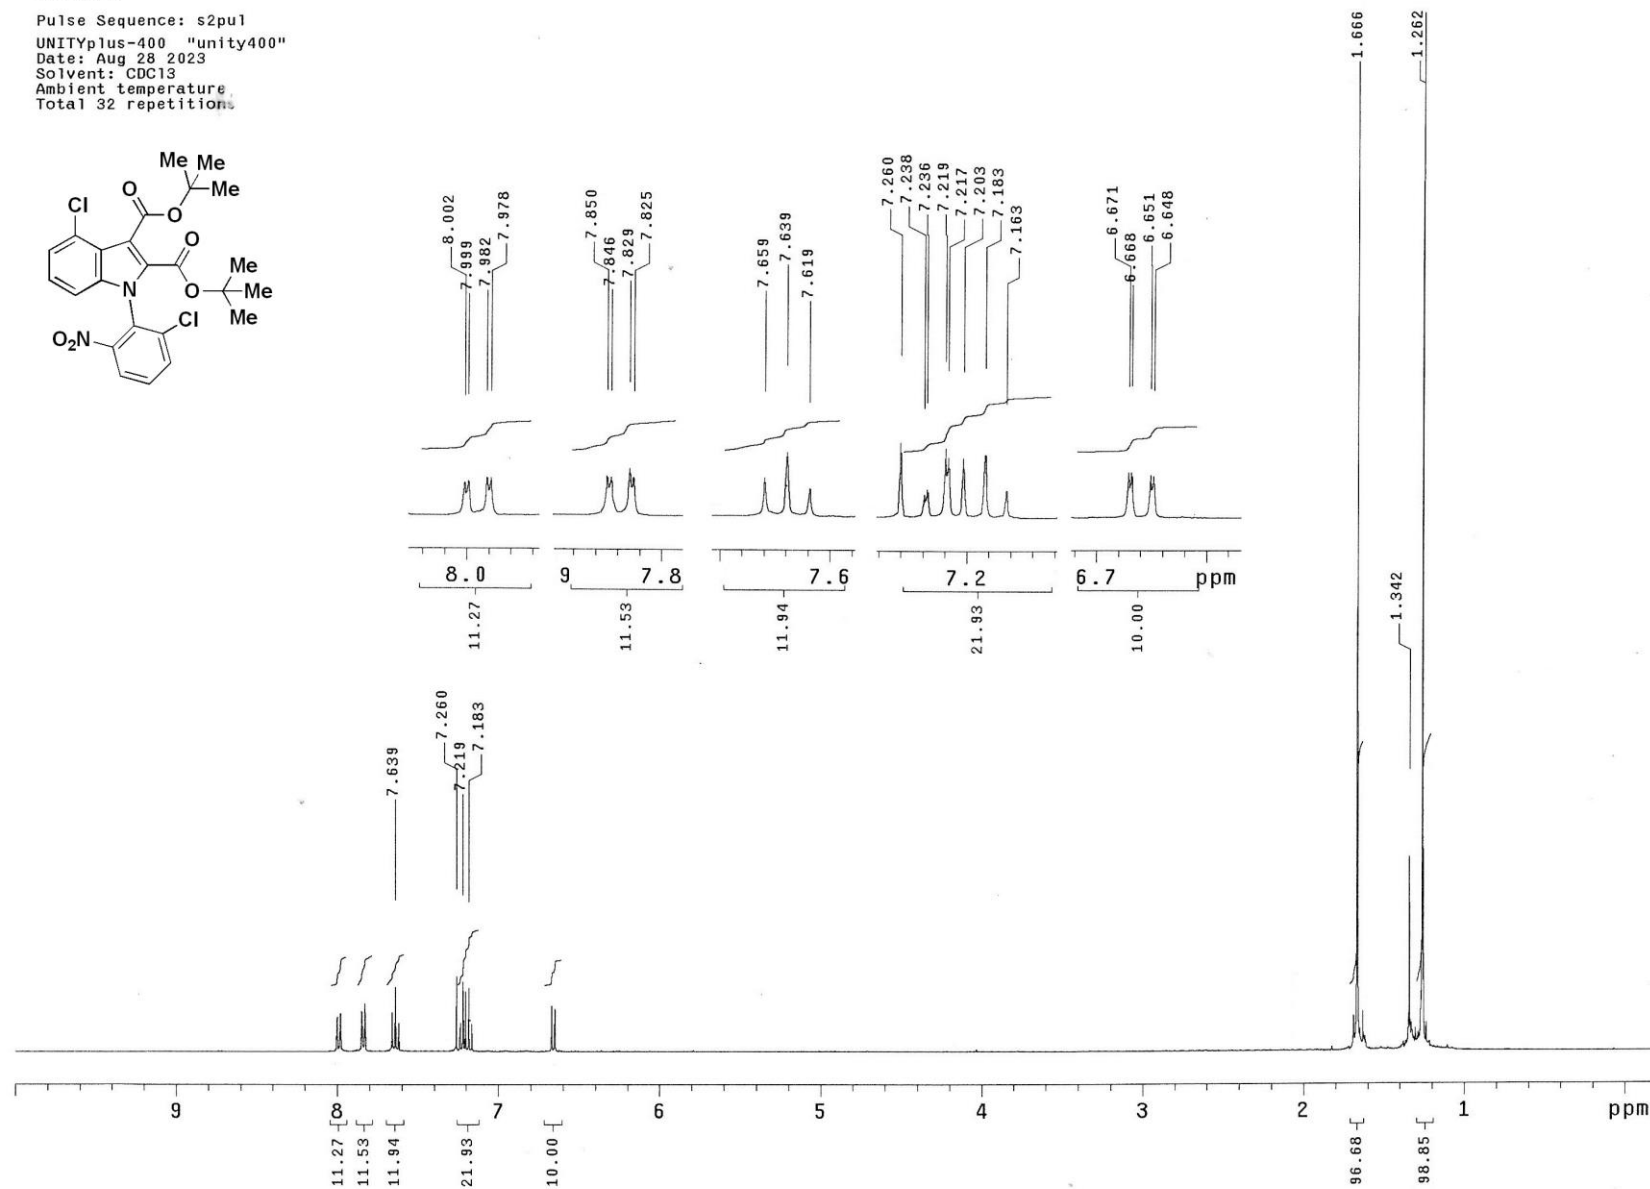

# Compound 4v (<sup>13</sup>C-NMR spectral data)

CHNF0512

Pulse Sequence: s2pu1  
 UNITYplus-400 "unity400"  
 Date: Aug 28 2023  
 Solvent: CDCl<sub>3</sub>  
 Ambient temperature  
 Total 4304 repetitions

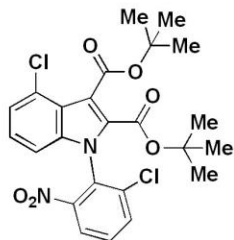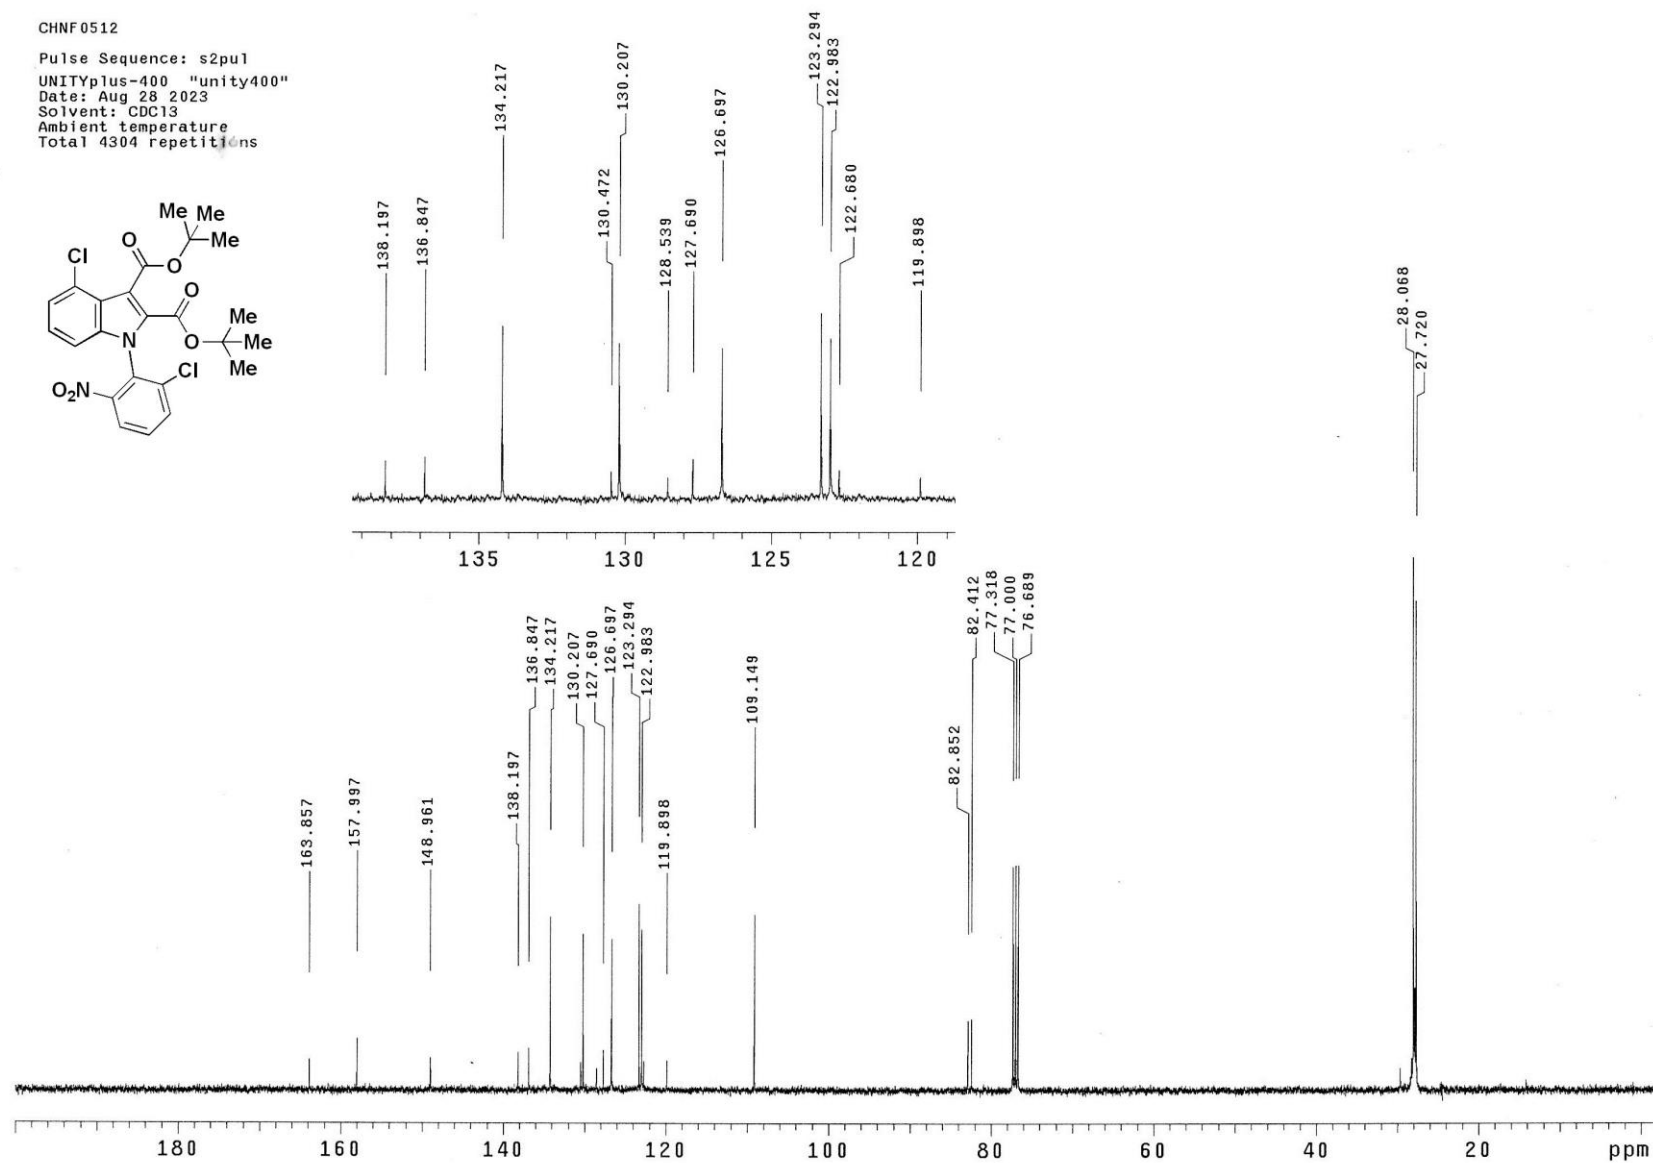

# Compound 4w (<sup>1</sup>H-NMR spectral data)

CHNF0919

Pulse Sequence: s2pu1  
 UNITYplus-400 "unity400"  
 Date: Sep 27 2023  
 Solvent: CDCl<sub>3</sub>  
 Ambient temperature  
 Total 64 repetitions

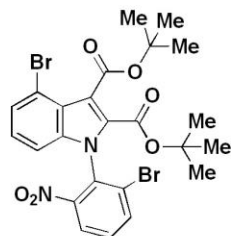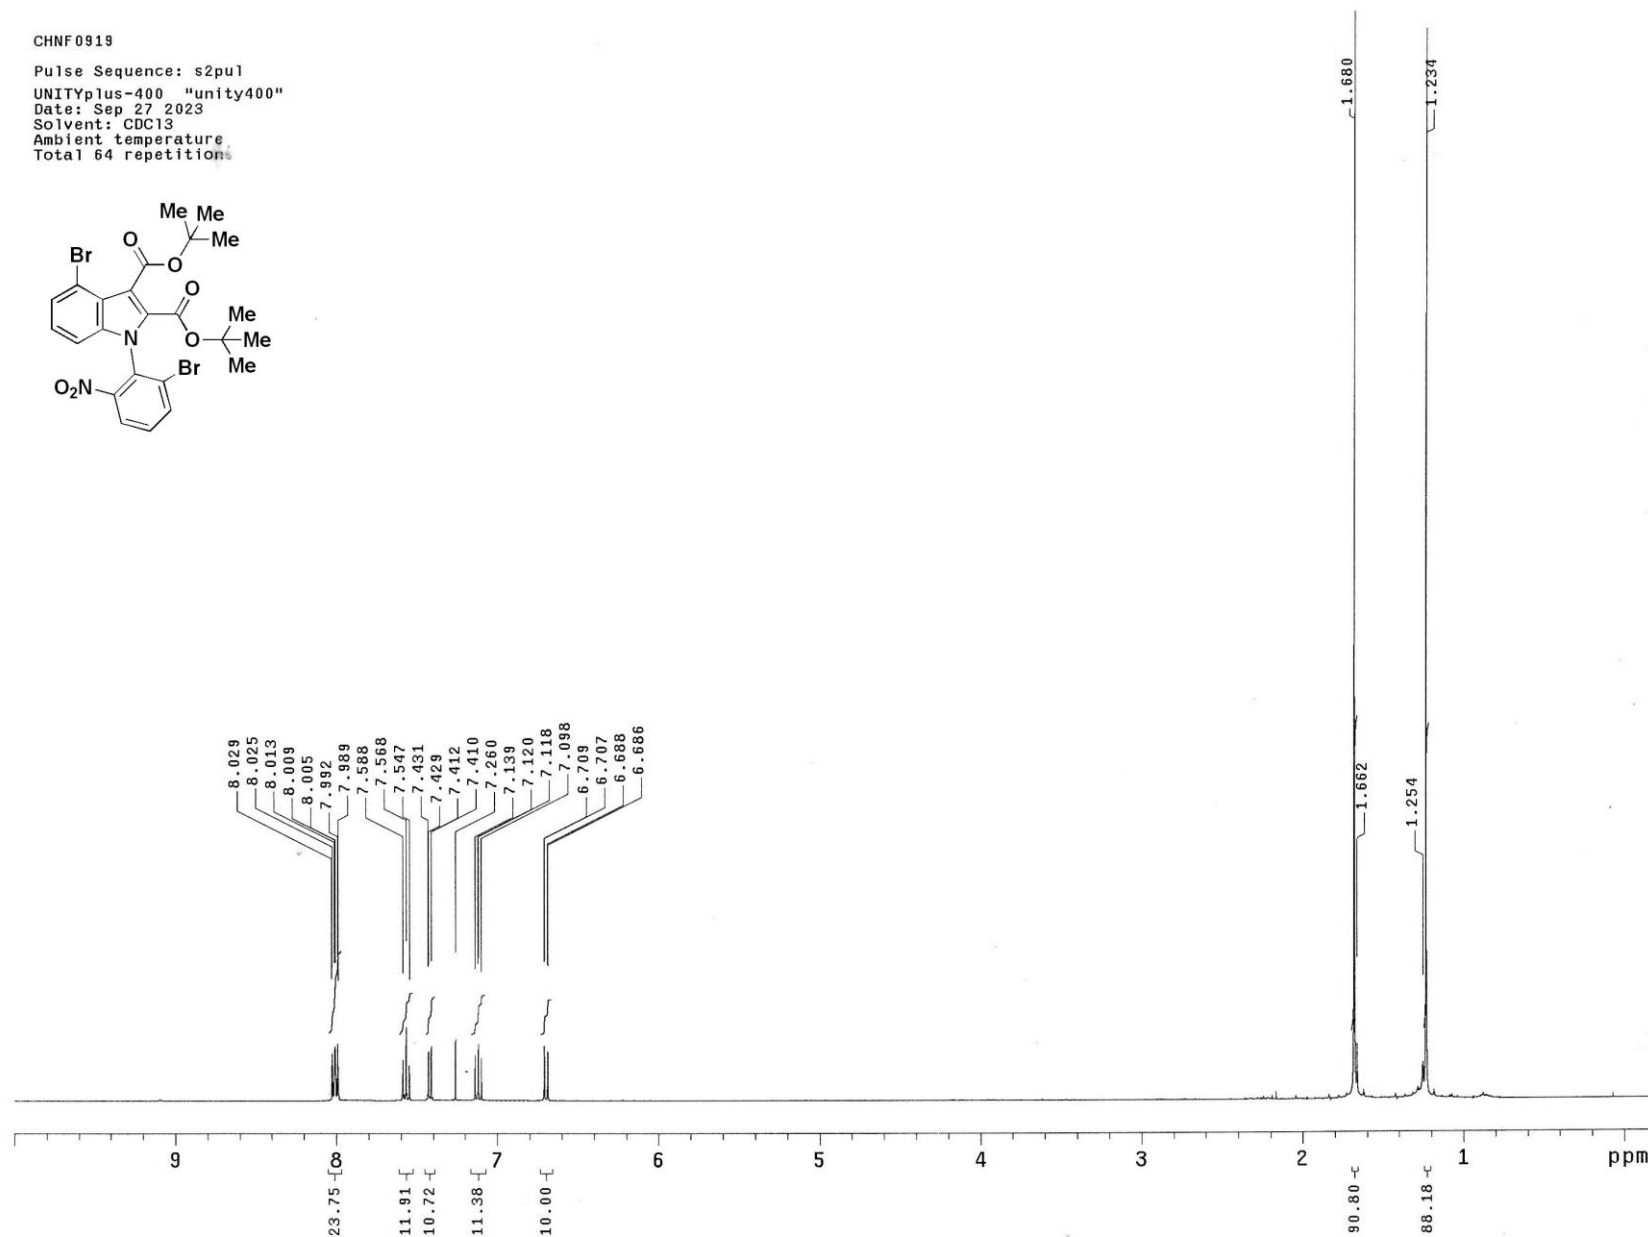

# Compound 4w (<sup>13</sup>C-NMR spectral data)

CHNF0919

Pulse Sequence: s2pu1  
 UNITYplus-400 "unity400"  
 Date: Sep 27 2023  
 Solvent: CDCl<sub>3</sub>  
 Ambient temperature  
 Total 3376 repetitions

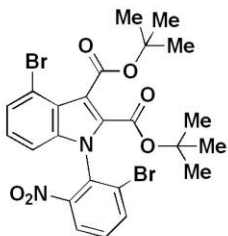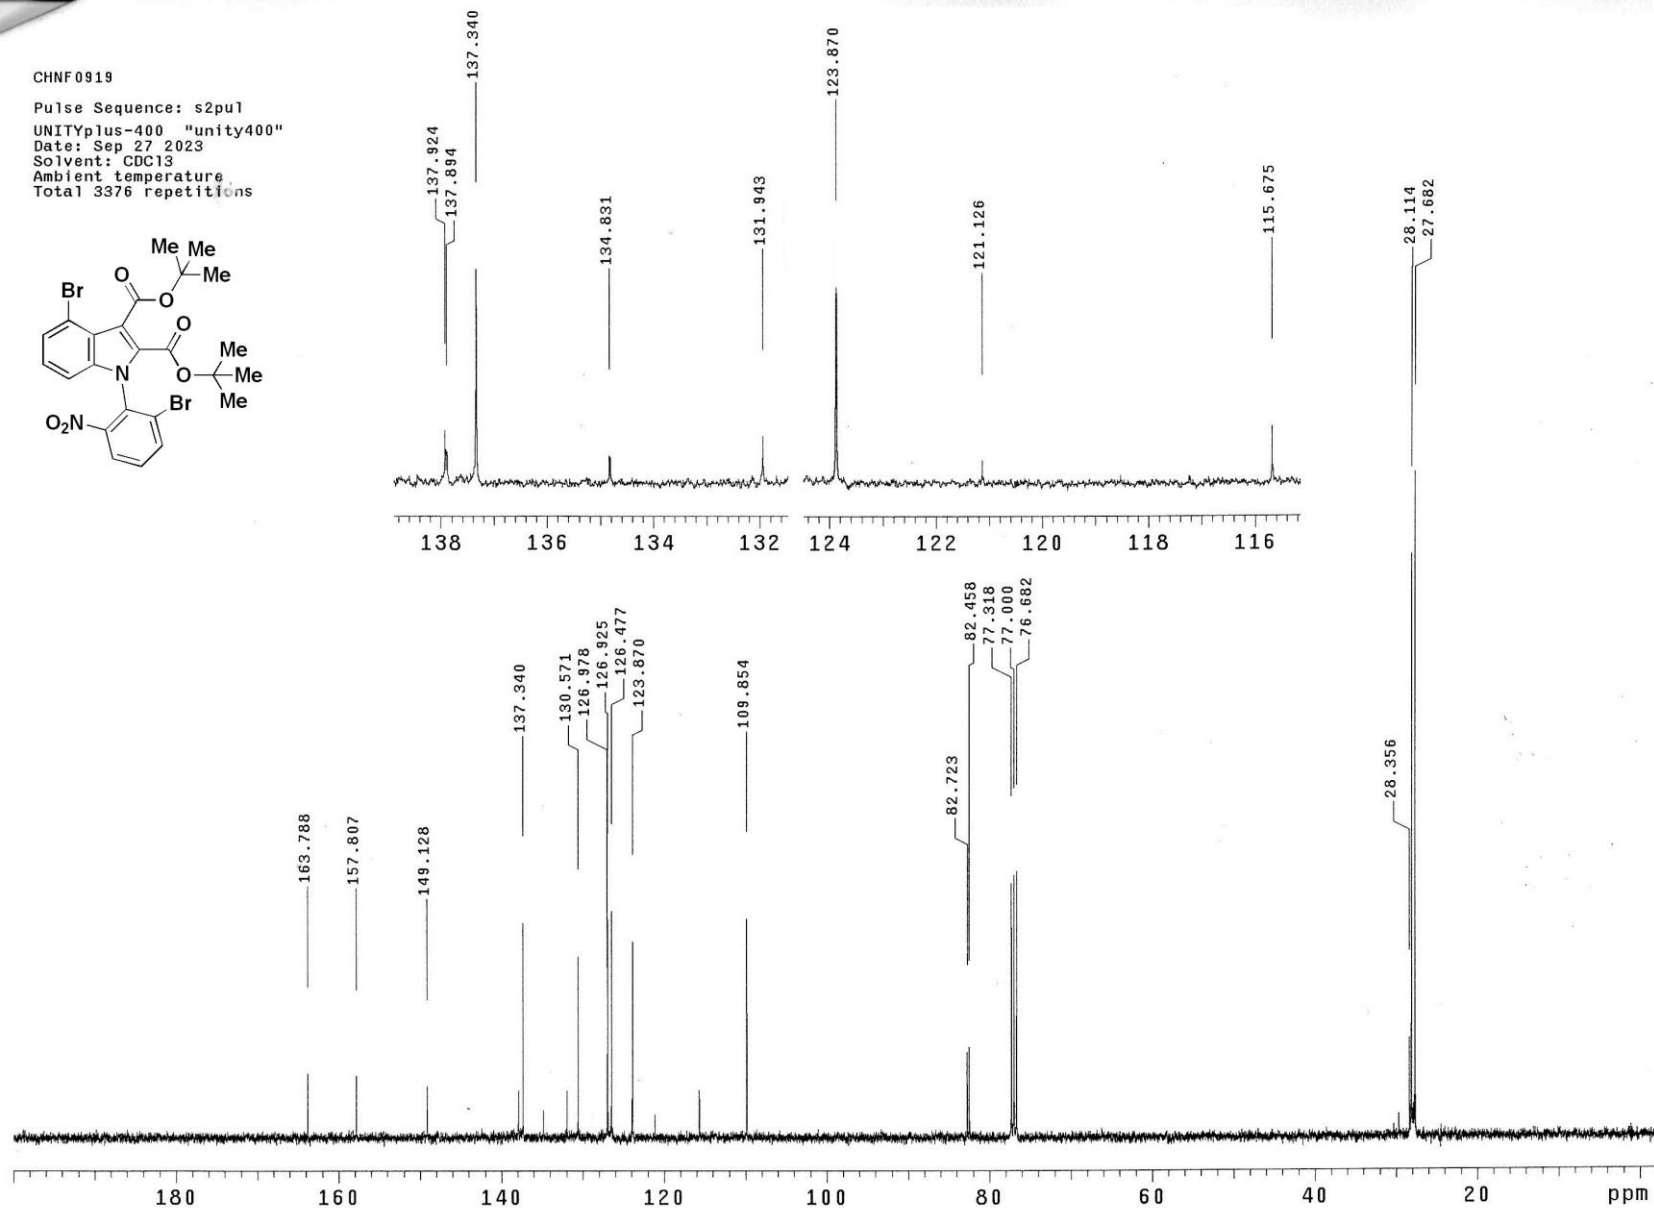



# Compound 4x (<sup>1</sup>H-NMR spectral data)

CHNF0829

Pulse Sequence: s2pu1  
 UNITYplus-400 "unity400"  
 Date: Aug 31 2023  
 Solvent: CDCl<sub>3</sub>  
 Ambient temperature  
 Total 276 repetitions

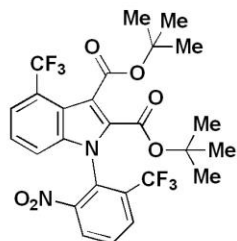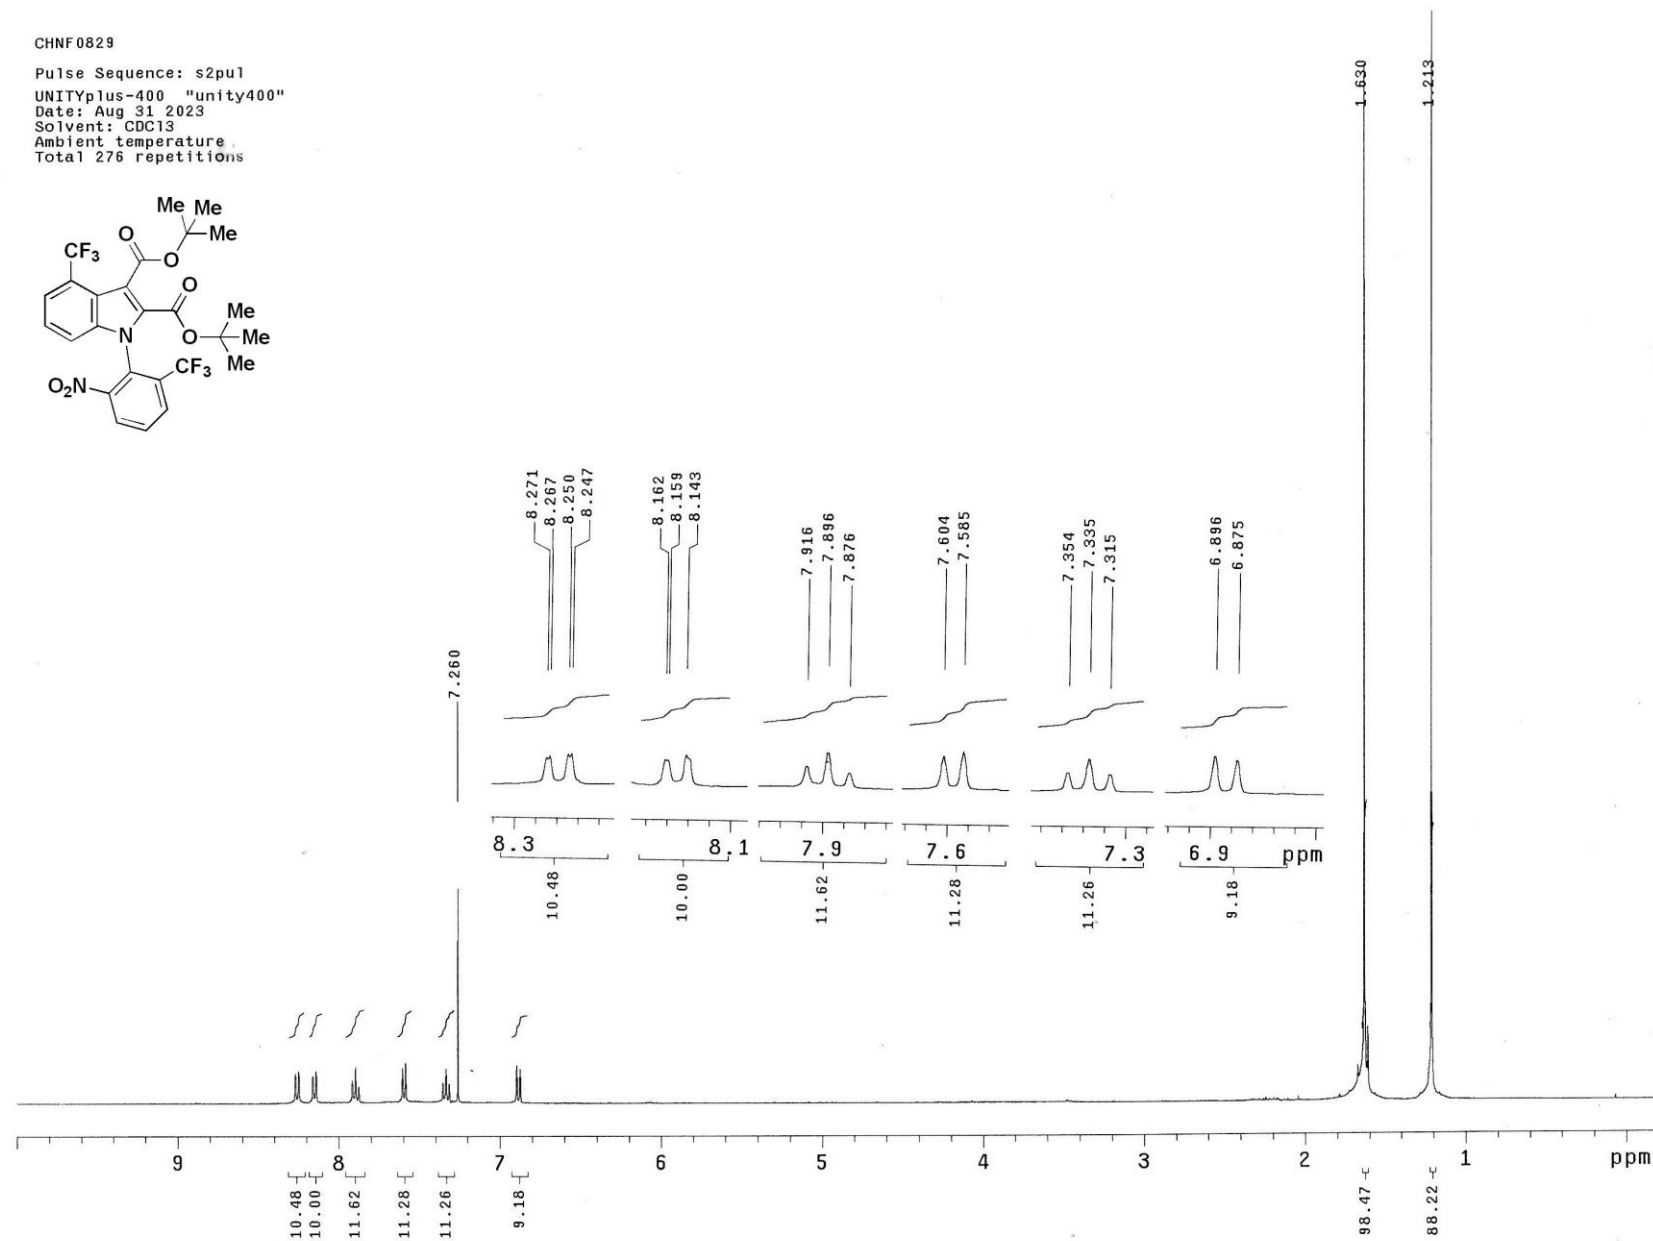

# Compound 4x (<sup>13</sup>C-NMR spectral data)

CHNF0829

Pulse Sequence: s2pul  
 UNITYplus-600 "KMU600.kmu.edu.tw"  
 Date: Aug 31 2023  
 Solvent: cdc13  
 Ambient temperature  
 Total 4824 repetitions

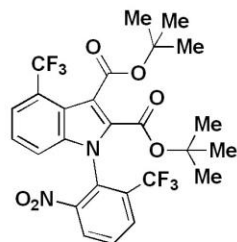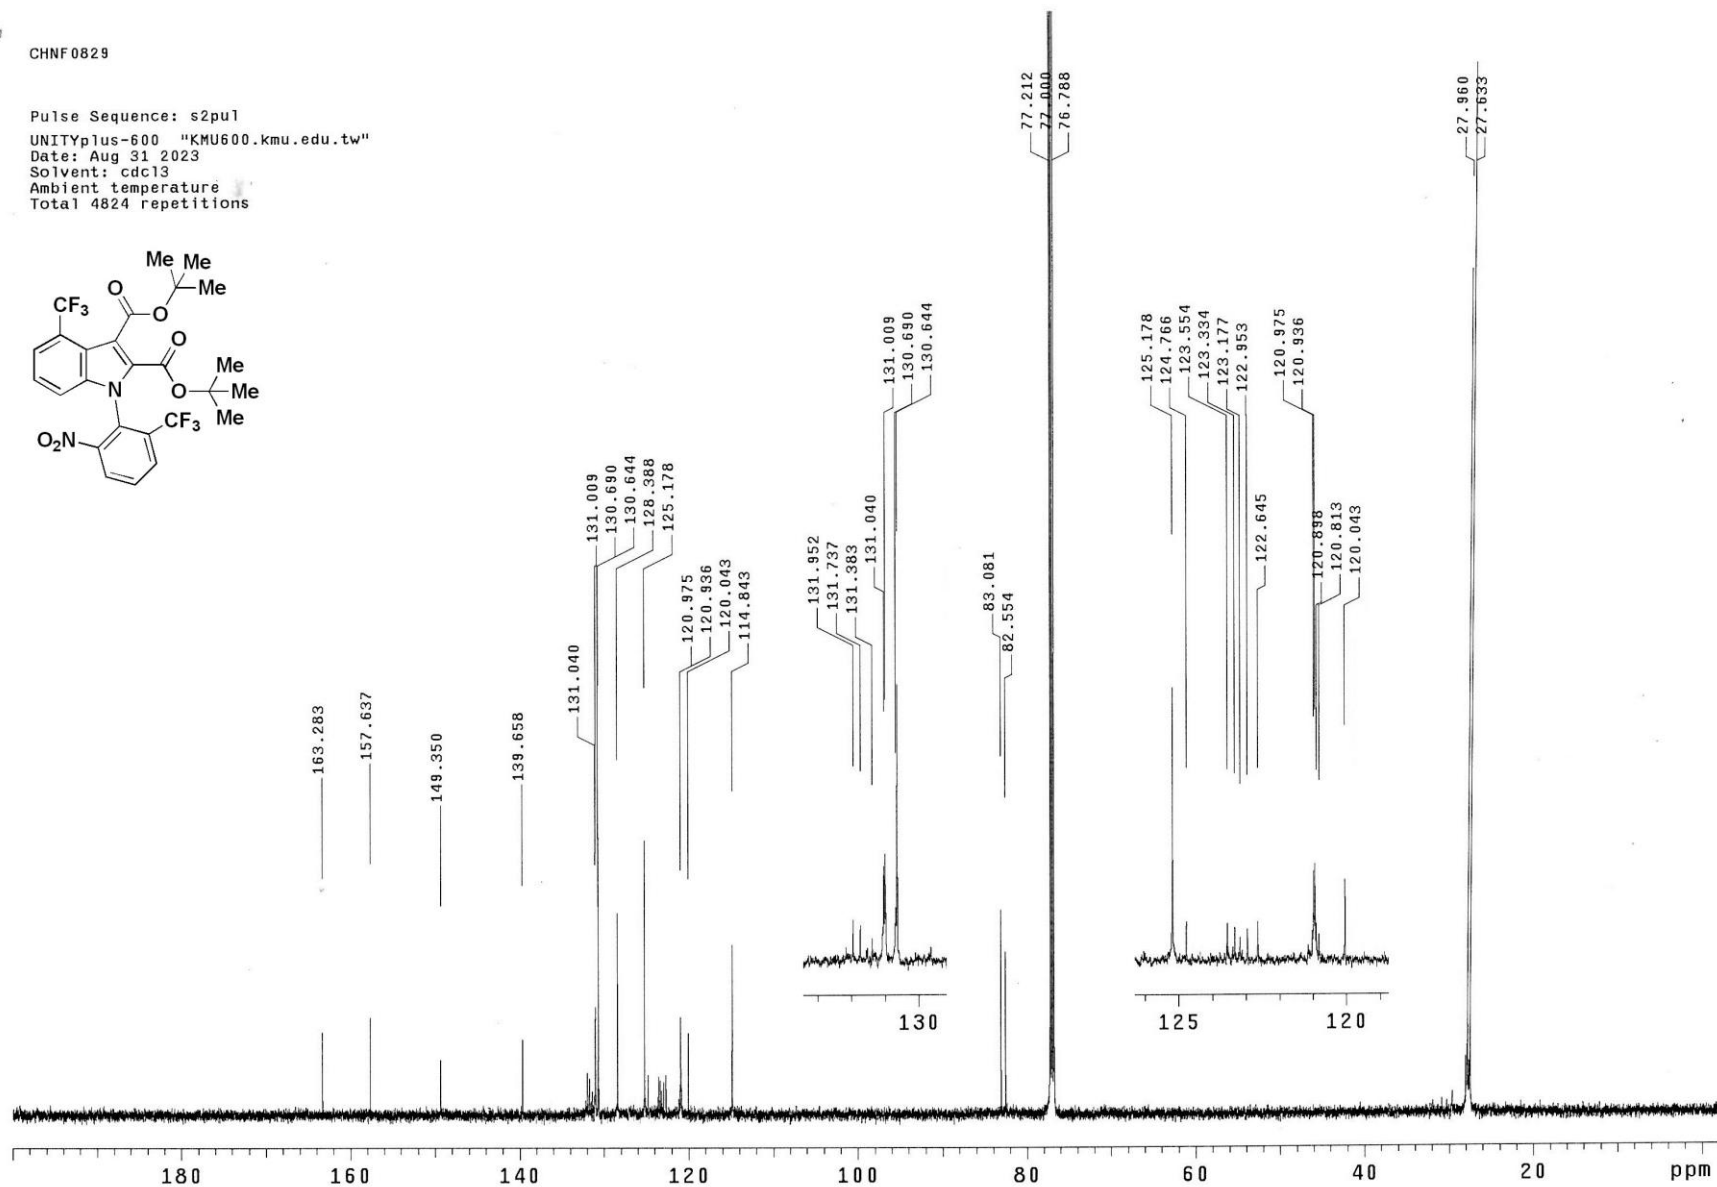

# Compound 4x (<sup>19</sup>F-NMR spectral data)

4x

Pulse Sequence: s2pu1.  
Mercury-400BB "MerPlus400"  
Date: Jan 18 2024  
Solvent: cdc13  
Ambient temperature  
Total 16 repetitions

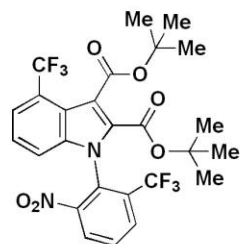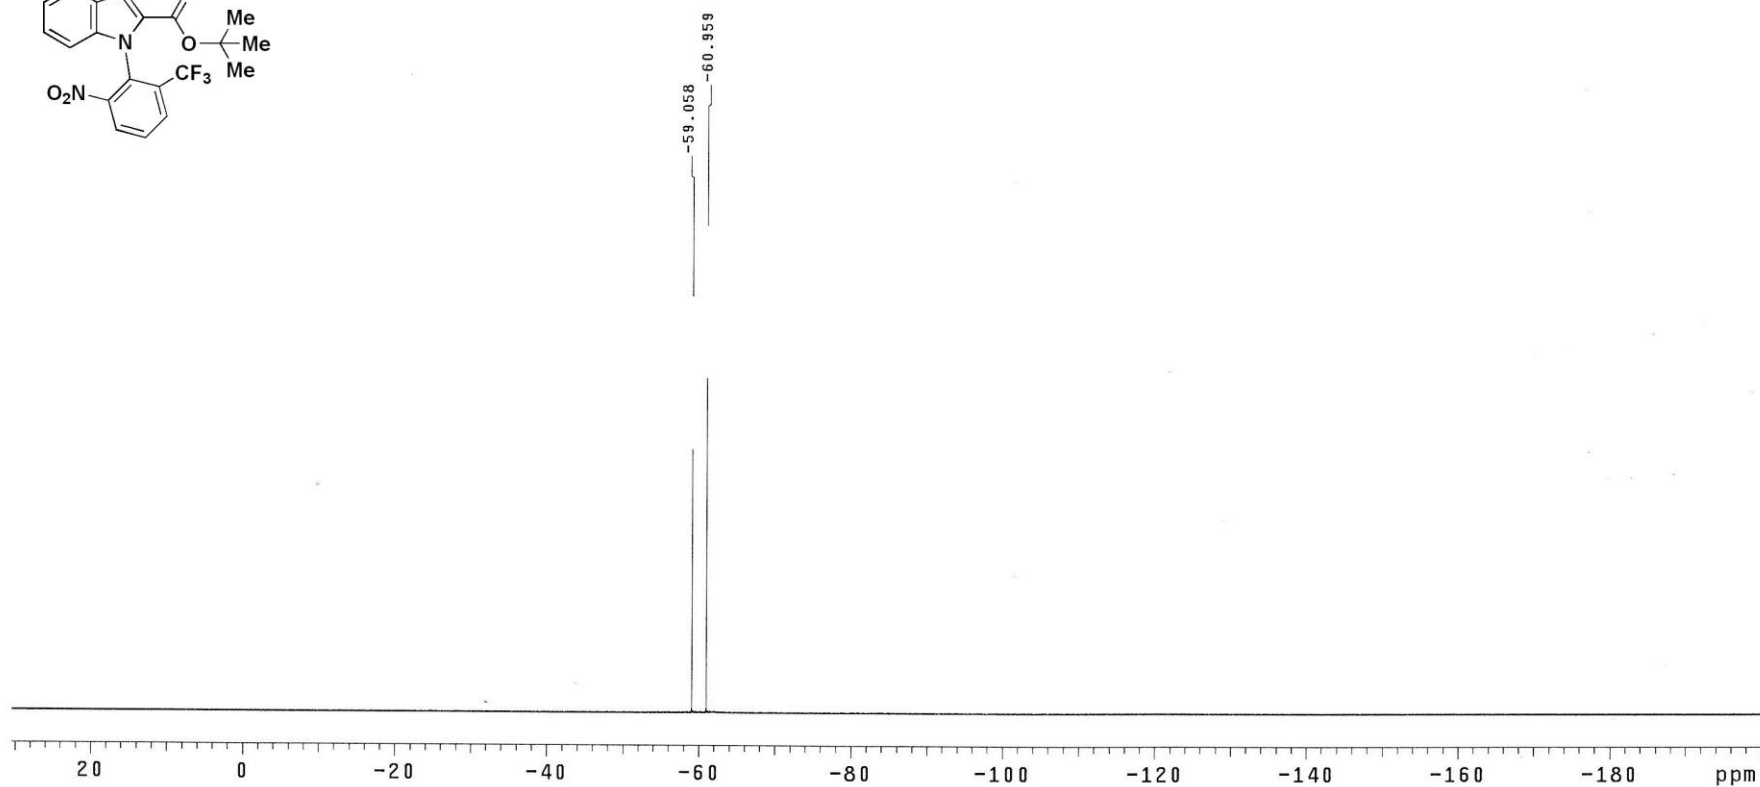

# Compound 4y (<sup>1</sup>H-NMR spectral data)

CHNF0909

Pulse Sequence: s2pu1  
 UNITYplus-400 "unity400"  
 Date: Oct 17 2023  
 Solvent: CDCl<sub>3</sub>  
 Ambient temperature  
 Total 32 repetition

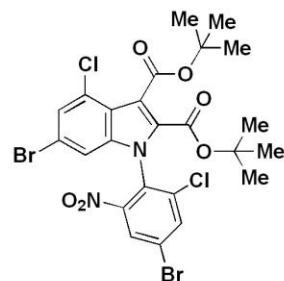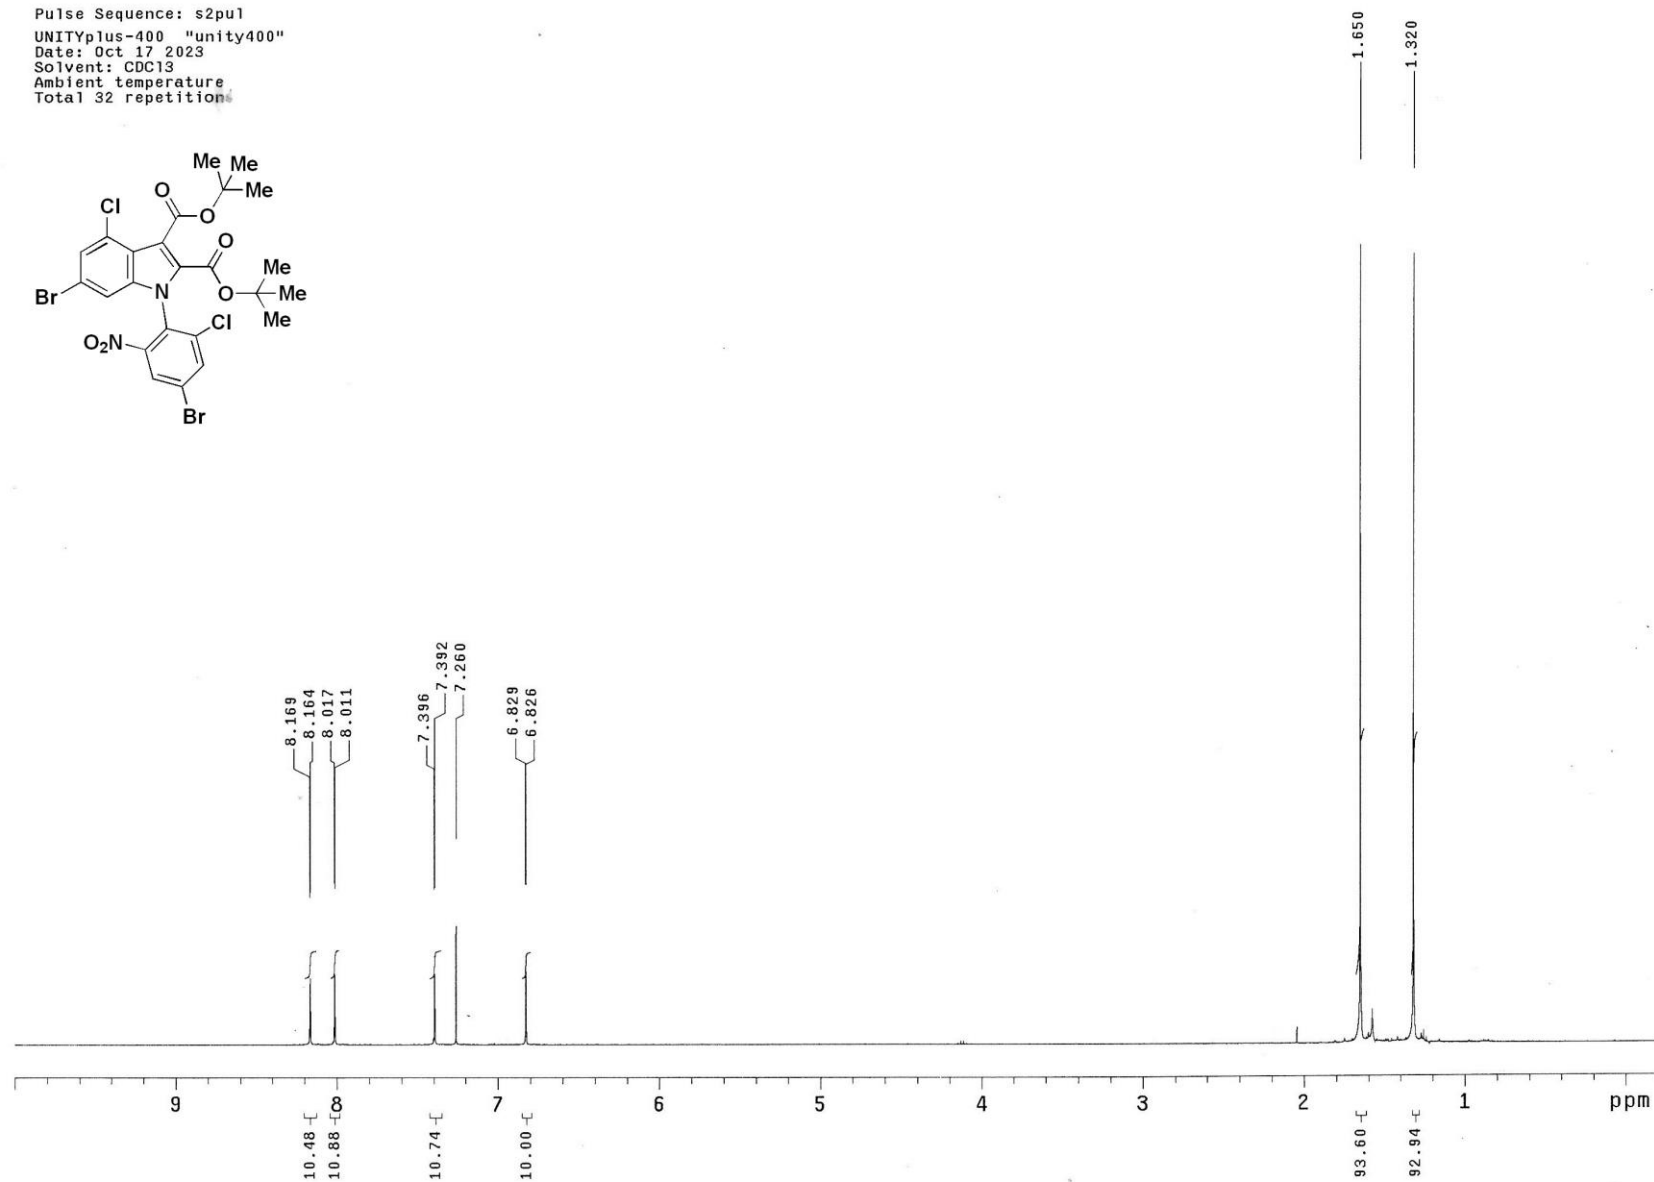

# Compound 4y (<sup>13</sup>C-NMR spectral data)

CHNF0909

Pulse Sequence: s2pu1  
 UNITYplus-400 "unity400"  
 Date: Oct 17 2023  
 Solvent: CDCl<sub>3</sub>  
 Ambient temperature  
 Total 7504 repetitions

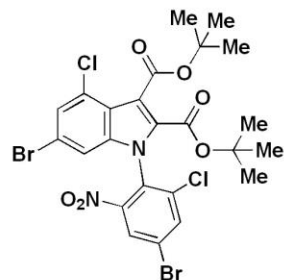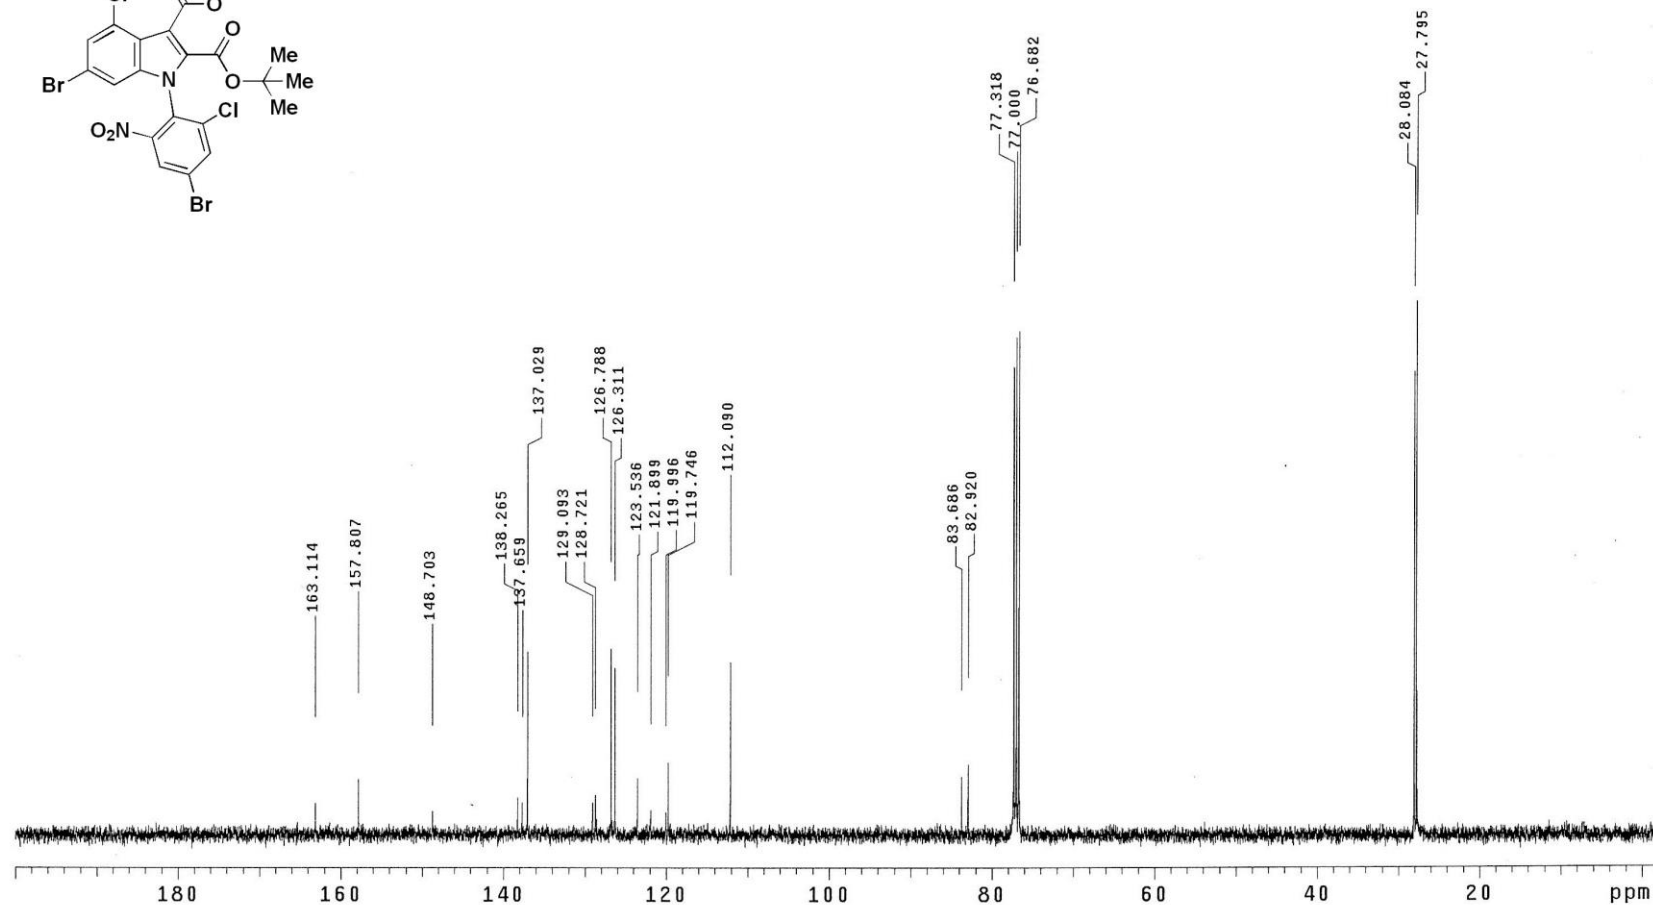

# Compound 4z (<sup>1</sup>H-NMR spectral data)

CHNF0714

Pulse Sequence: s2pu1  
 UNITYplus-400 "unity400"  
 Date: Jul 17 2023  
 Solvent: CDCl<sub>3</sub>  
 Ambient temperature  
 Total 120 repetitions

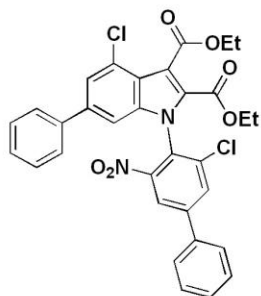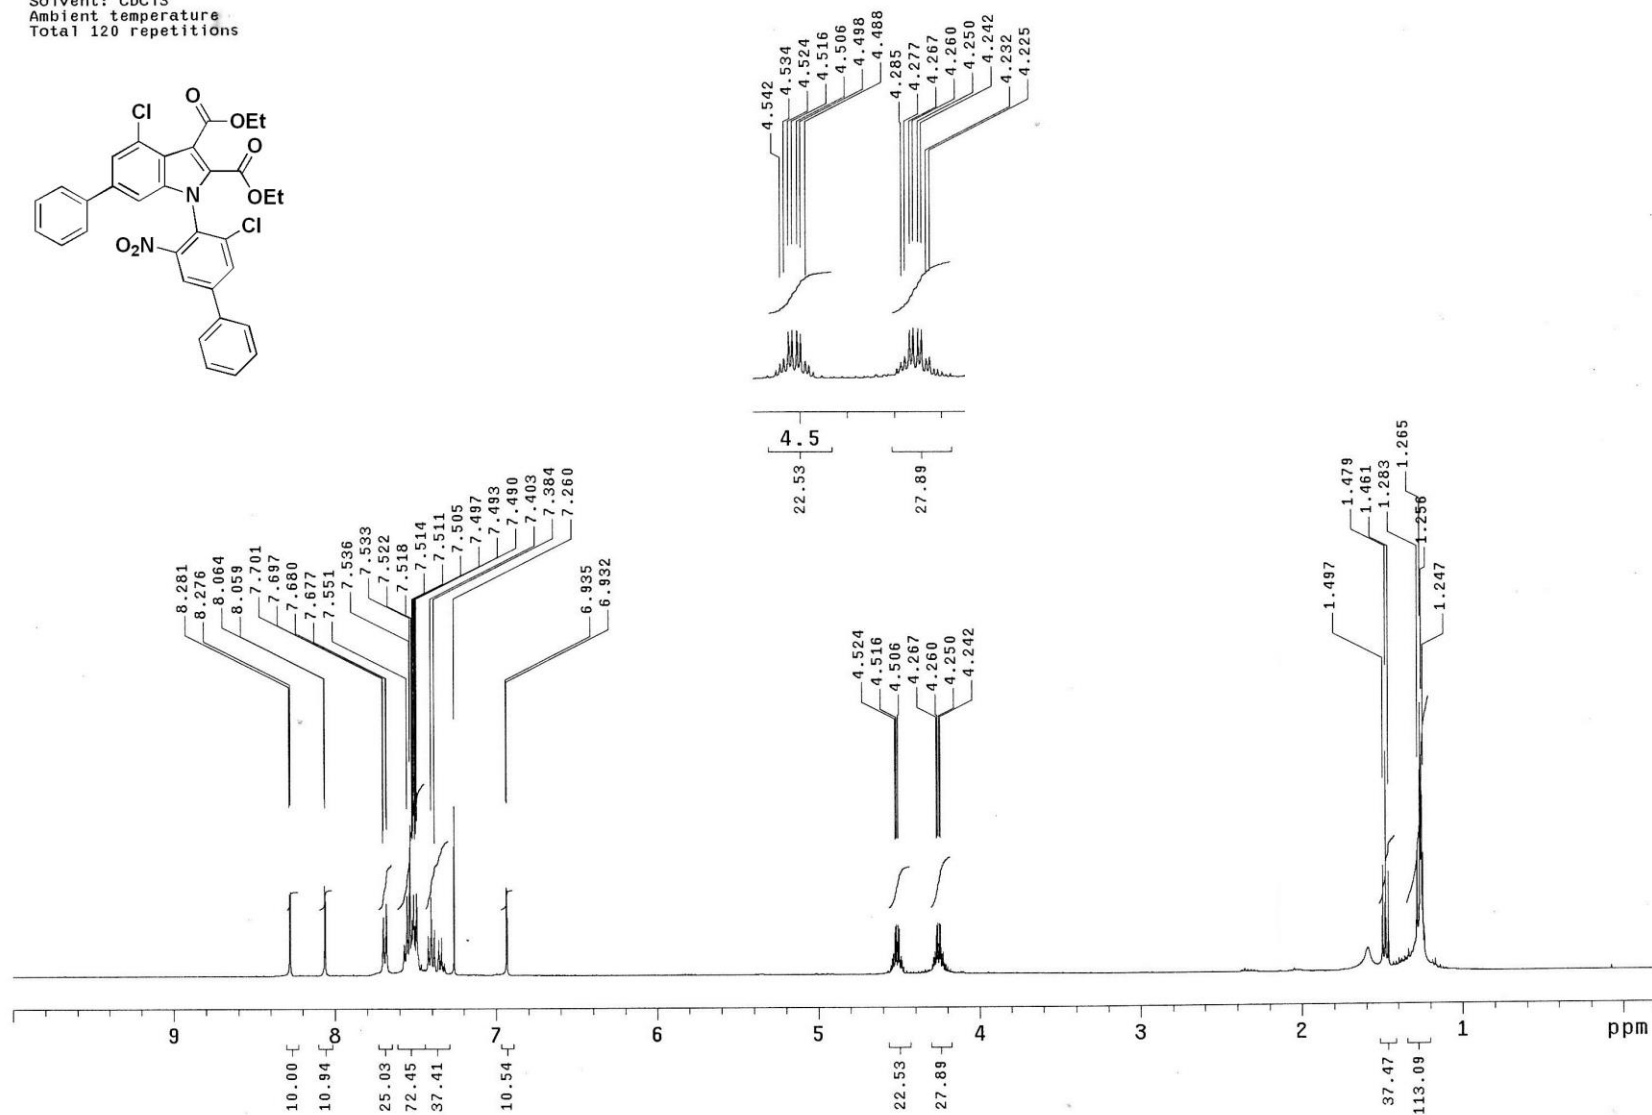

# Compound 4z (<sup>13</sup>C-NMR spectral data)

CHNF0714

Pulse Sequence: s2pu1  
 UNITYplus-400 "unity400"  
 Date: Jul 17 2023  
 Solvent: CDCl<sub>3</sub>  
 Ambient temperature  
 Total 4608 repetitions

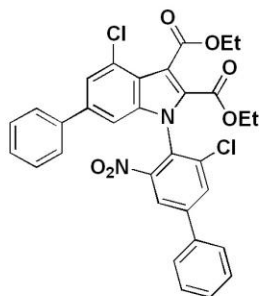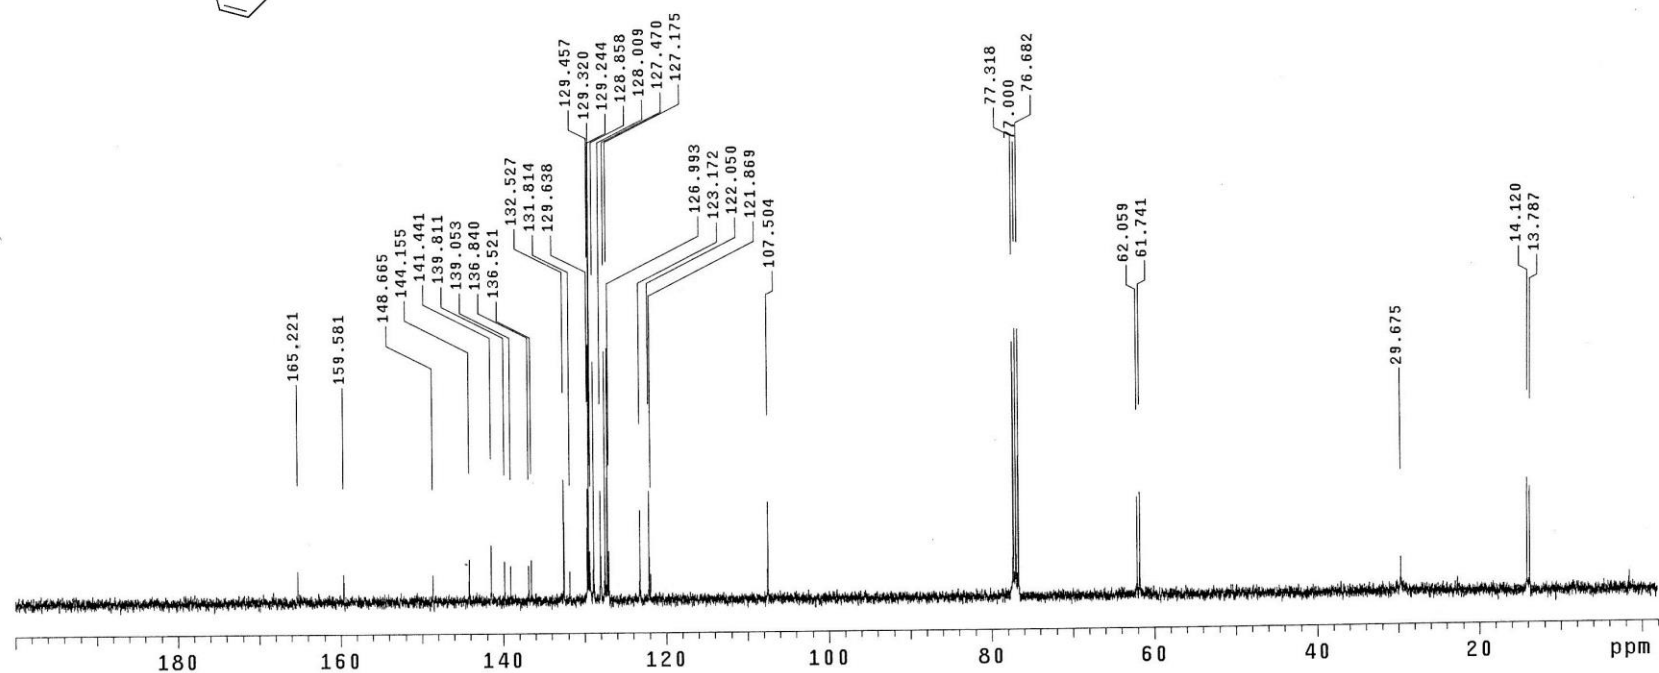

# Compound 4aa (<sup>1</sup>H-NMR spectral data)

CHNF0718

Pulse Sequence: s2pu1

UNITYplus-400 "unity400"

Date: Jul 19 2023

Solvent: CDCl<sub>3</sub>

Ambient temperature

Total 32 repetitions

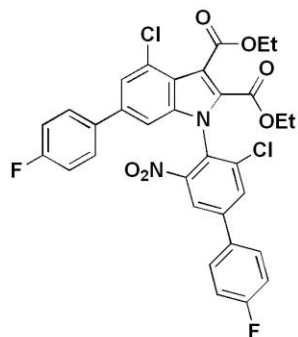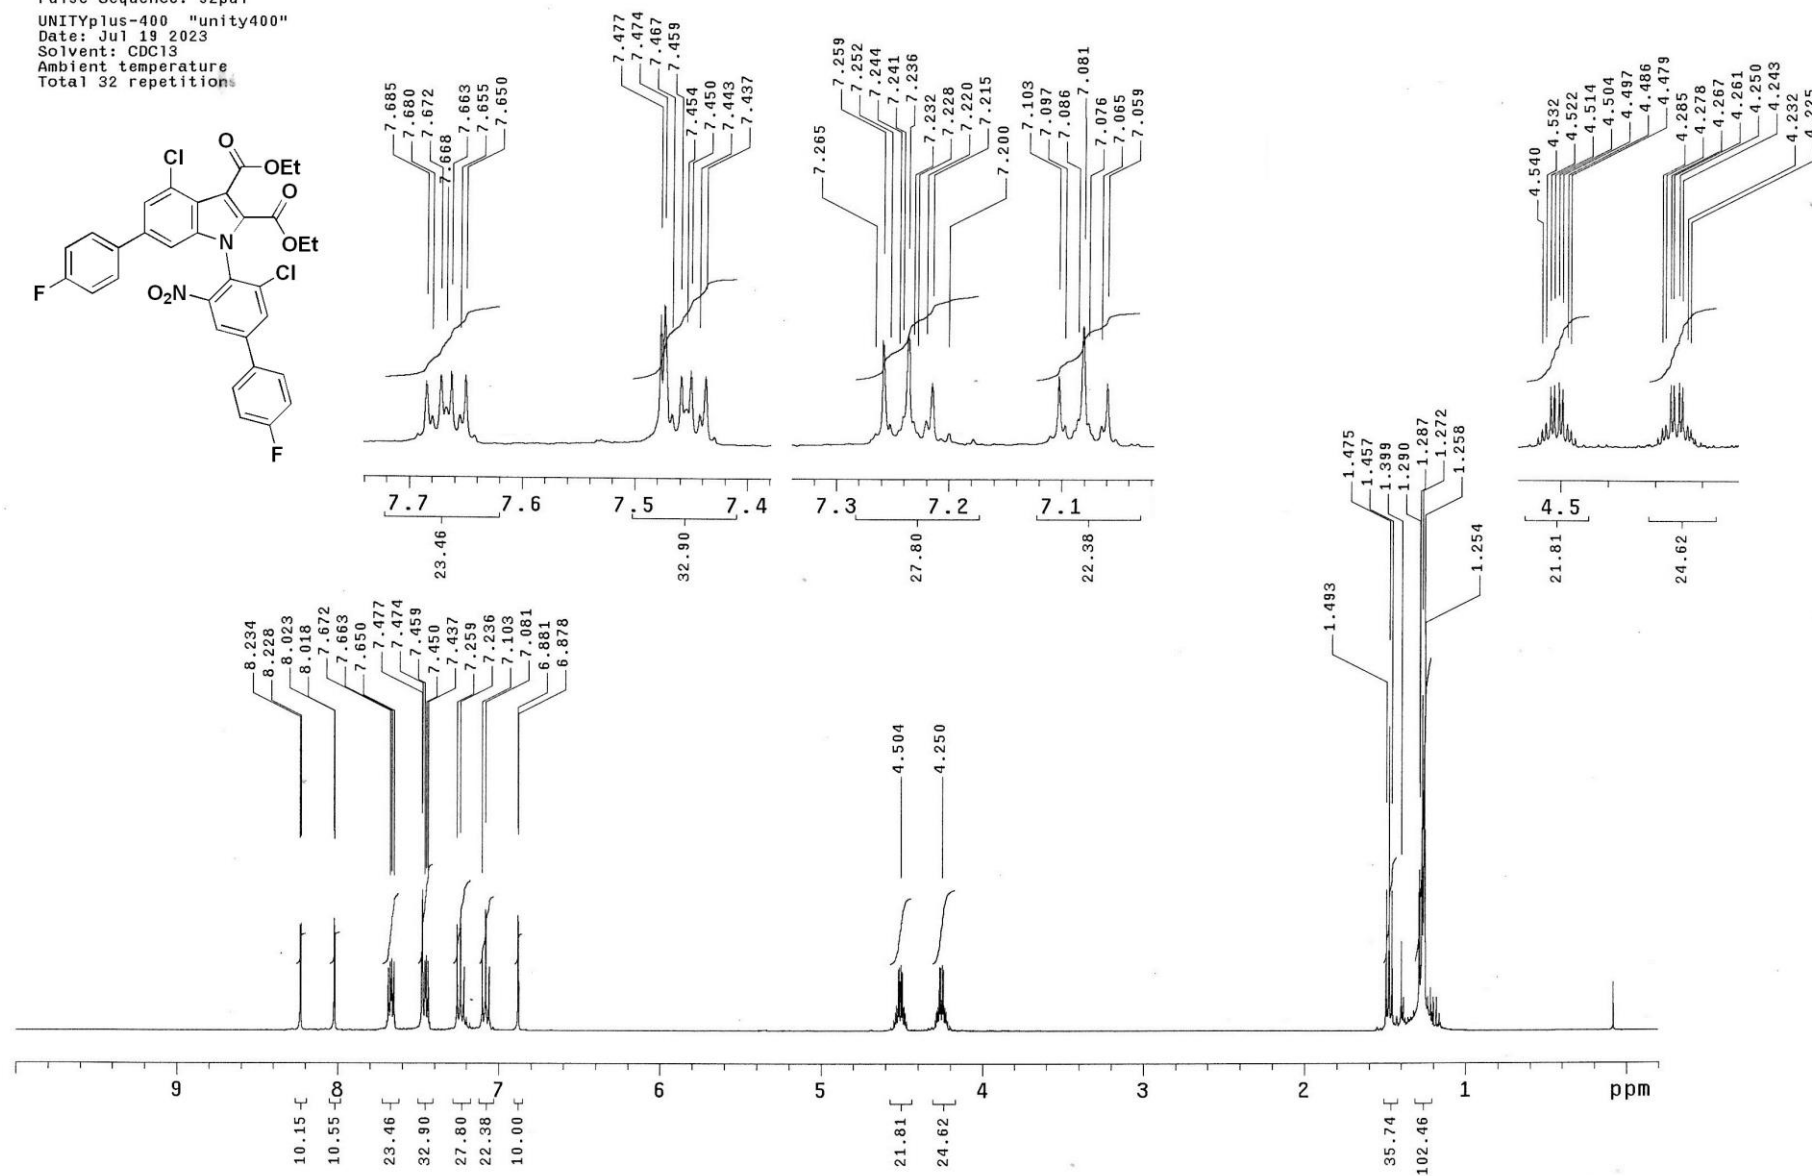



# Compound 4aa (<sup>13</sup>C-NMR spectral data)

CHNF0718

Pulse Sequence: s2pu1

UNITYplus-400 "unity400"

Date: Jul 19 2023

Solvent: CDCl<sub>3</sub>

Ambient temperature

Total 2368 repetitions

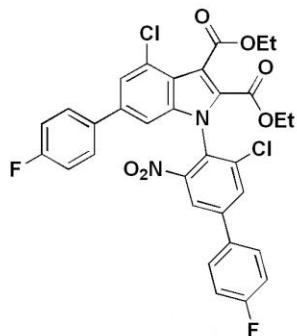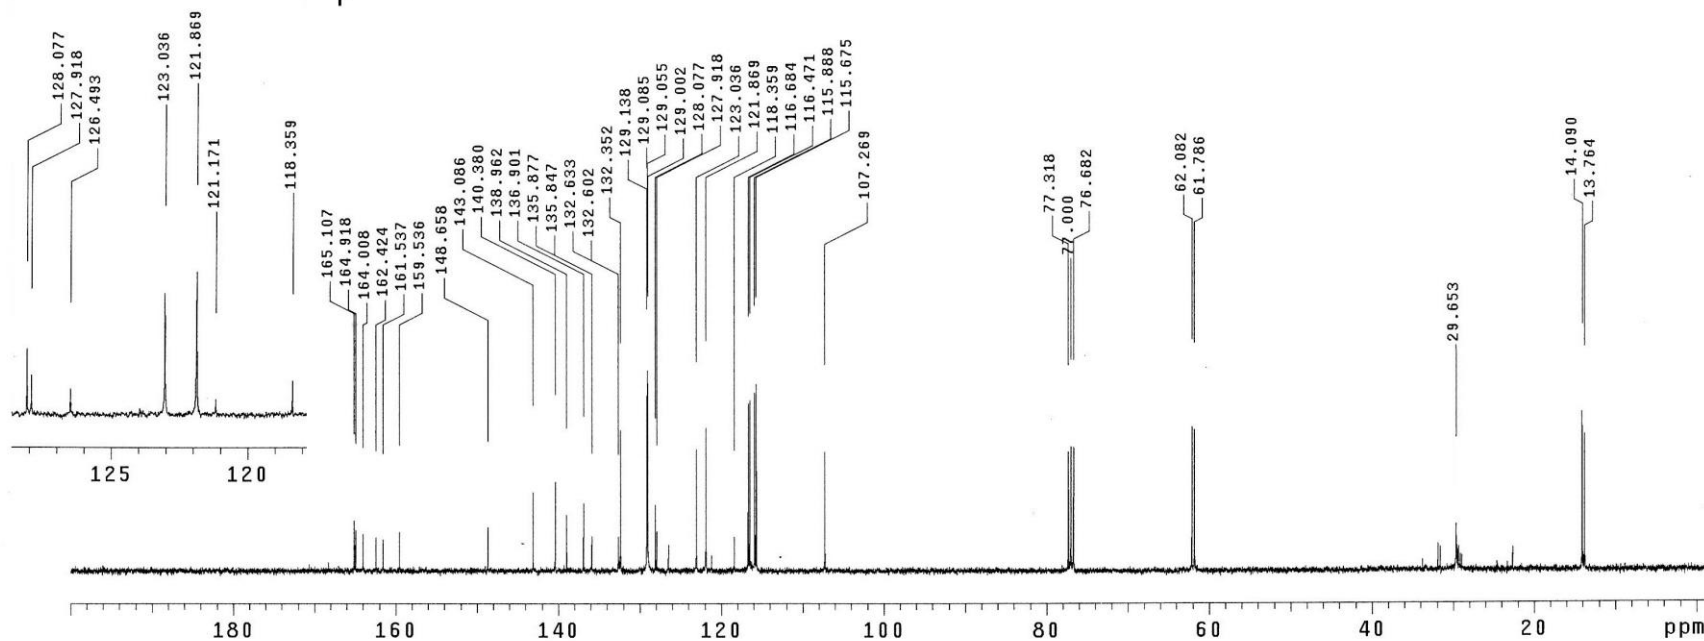

# Compound 4aa (<sup>19</sup>F-NMR spectral data)

4aa

Pulse Sequence: s2pu1  
Mercury-400BB "MerPlus400"  
Date: Jan 18 2024  
Solvent: cdc13  
Ambient temperature  
Total 40 repetitions

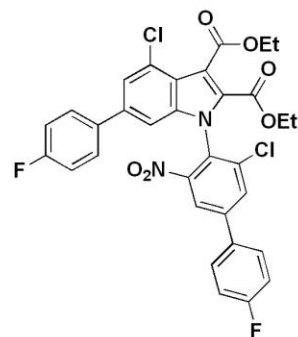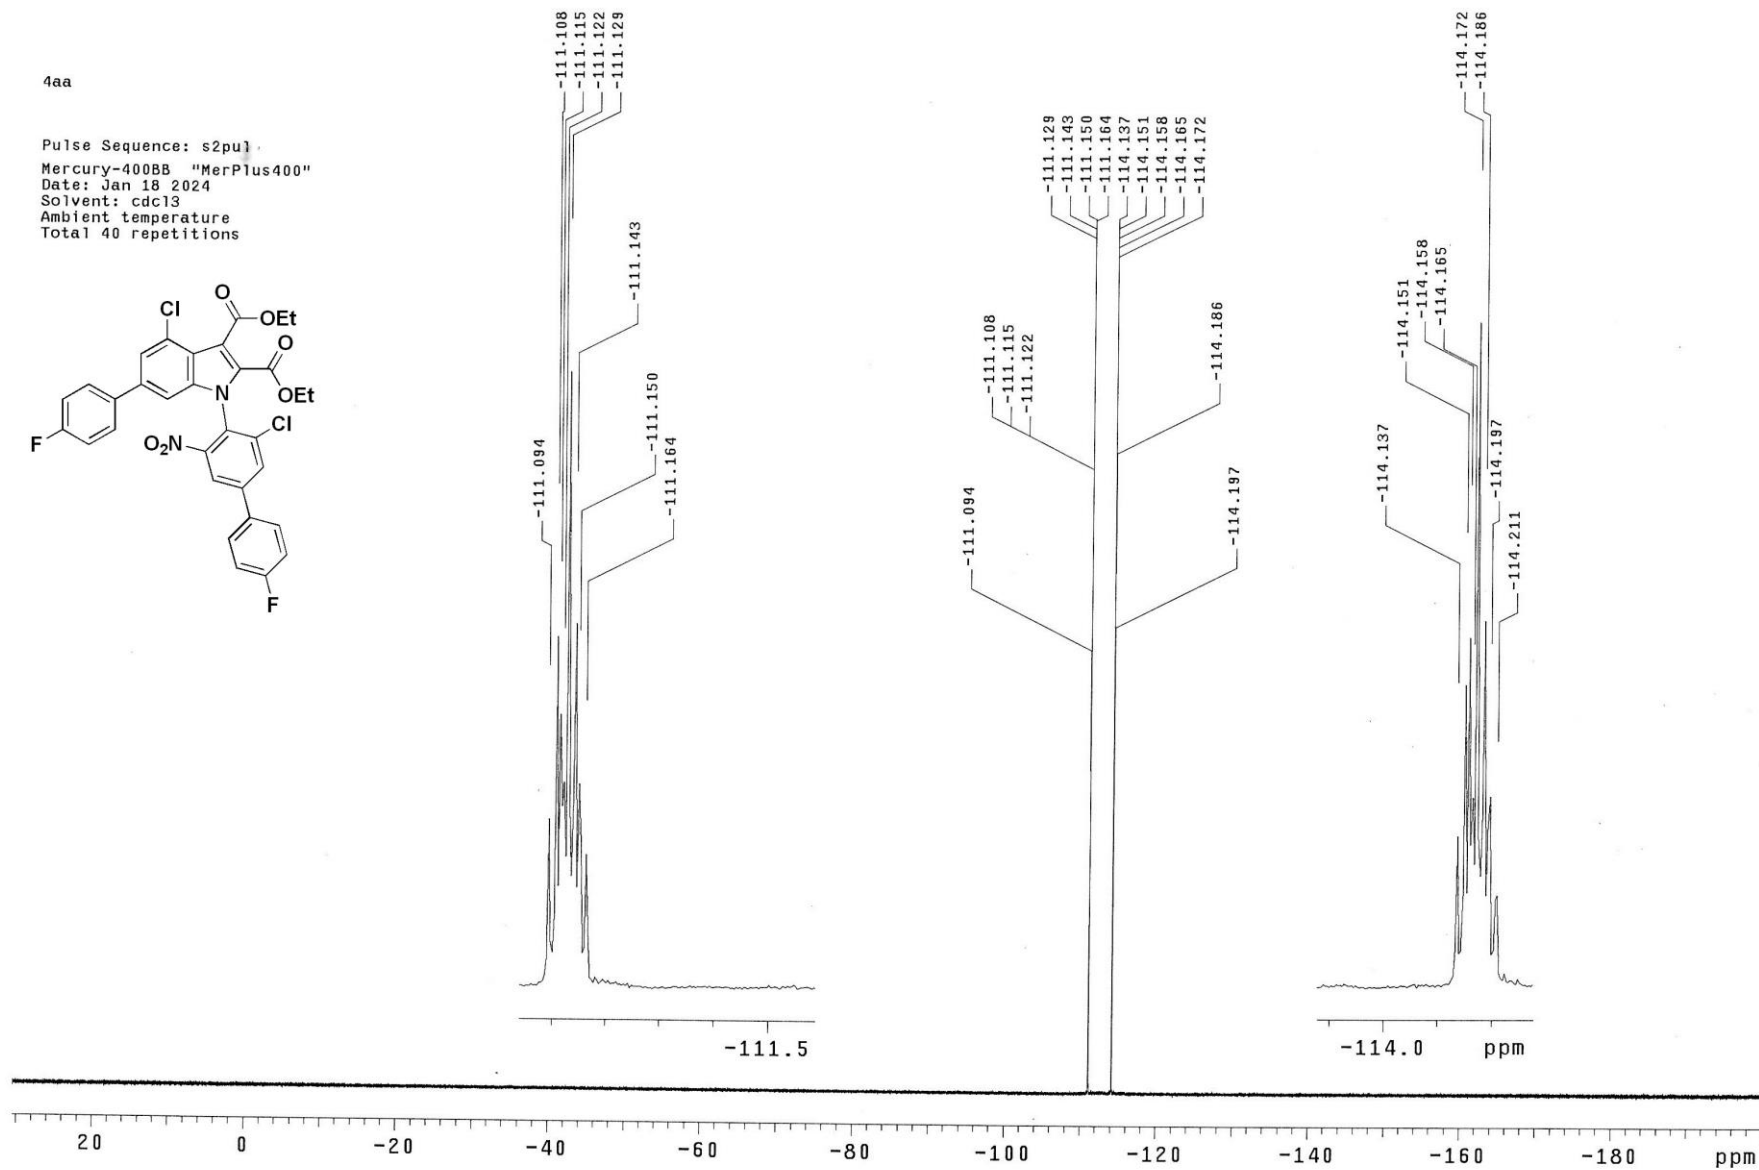

# Compound 4ab (<sup>1</sup>H-NMR spectral data)

CHNF0724

Pulse Sequence: s2pu1  
 UNITYplus-400 "unity400"  
 Date: Jul 26 2023  
 Solvent: pyridine  
 Ambient temperature  
 Total 64 repetitions

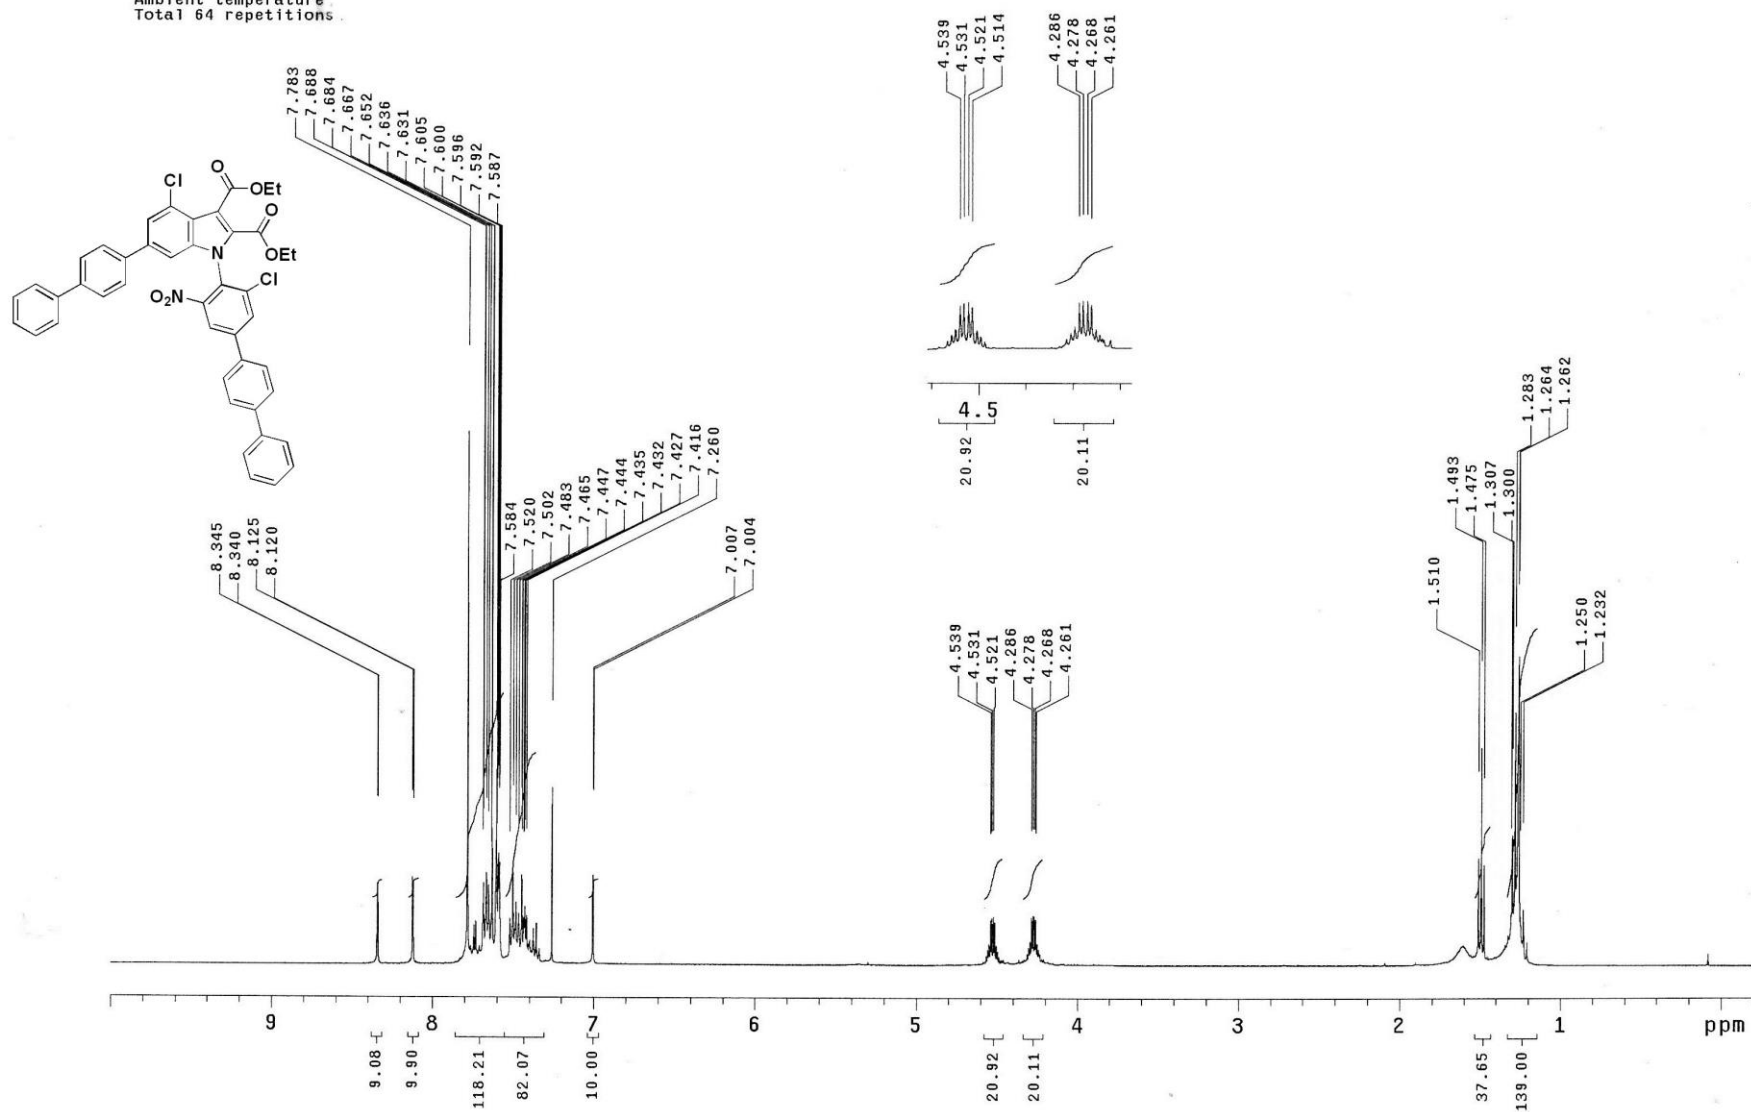

# Compound 4ab (<sup>13</sup>C-NMR spectral data)

CHNF0724

Pulse Sequence: s2pu1

UNITYplus-400 "unity400"

Date: Jul 26 2023

Solvent: CDCl<sub>3</sub>

Ambient temperature

Total 64000 repetitions

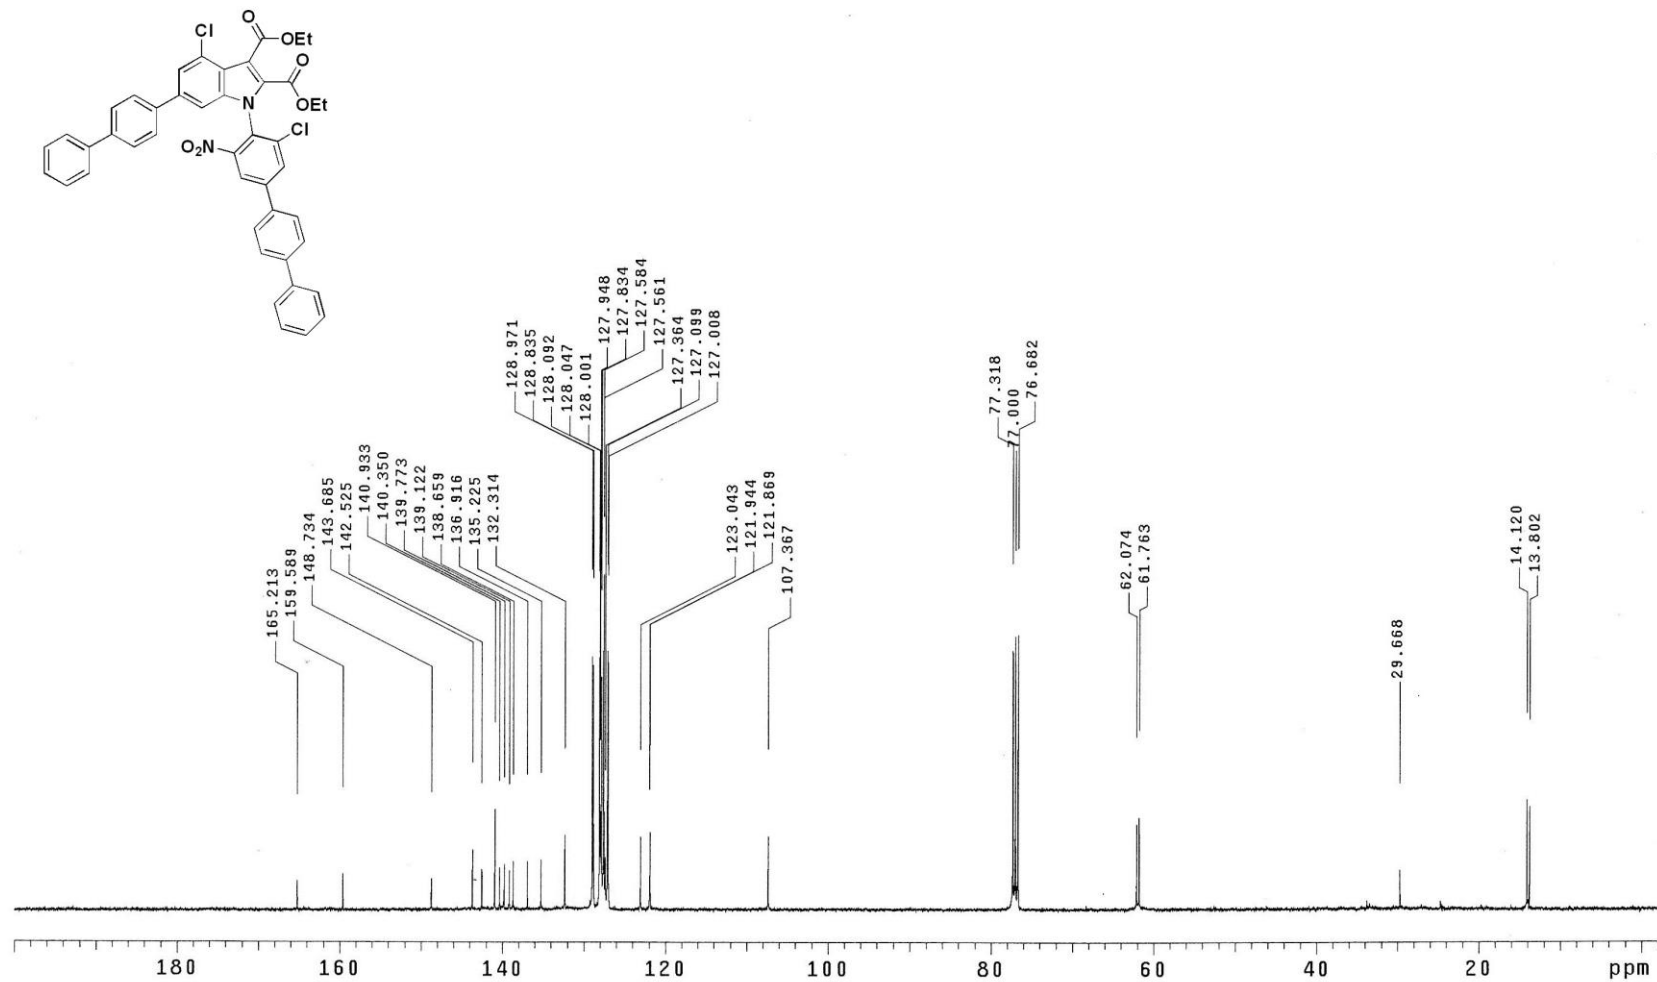

# Compound 4ac (<sup>1</sup>H-NMR spectral data)

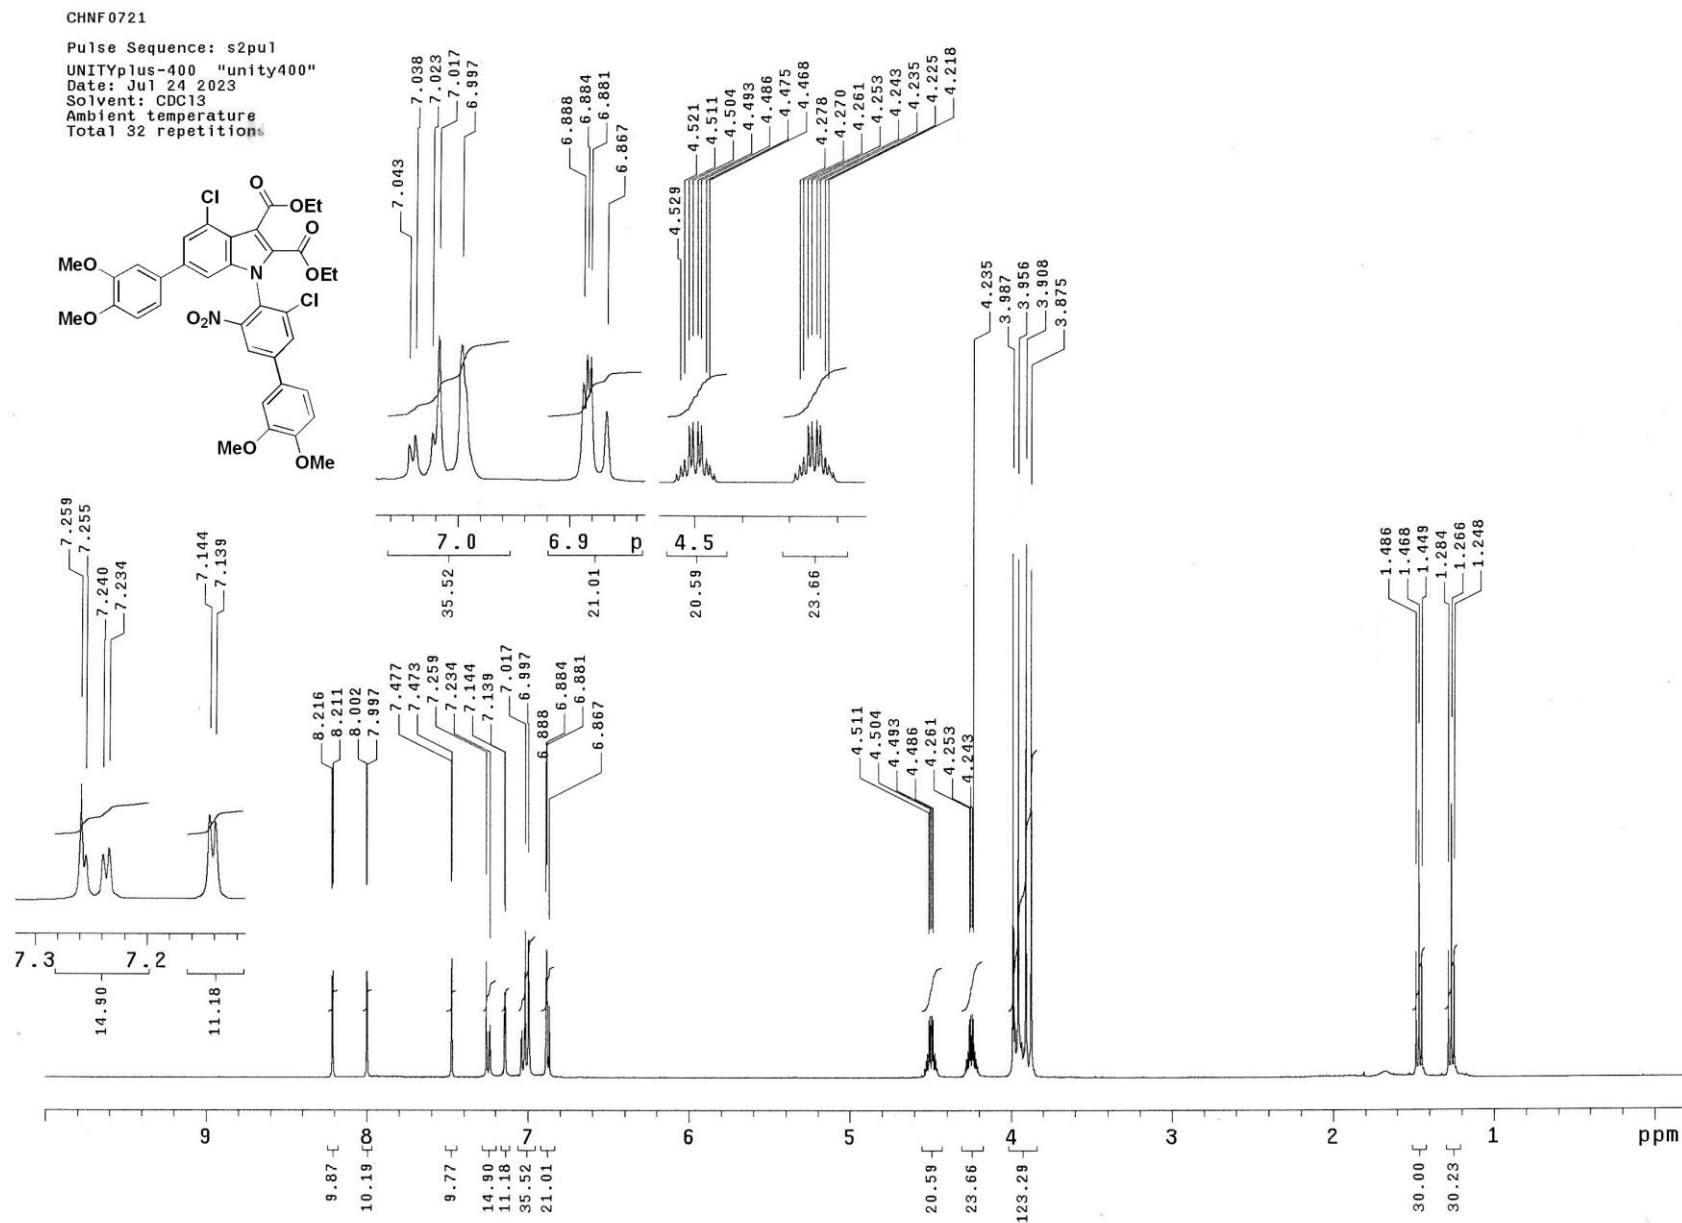

# Compound 4ac (<sup>13</sup>C-NMR spectral data)

CHNF0721

Pulse Sequence: s2pu1  
 UNITYplus-400 "unity400"  
 Date: Jul 24 2023  
 Solvent: CDCl<sub>3</sub>  
 Ambient temperature  
 Total 1312 repetitions

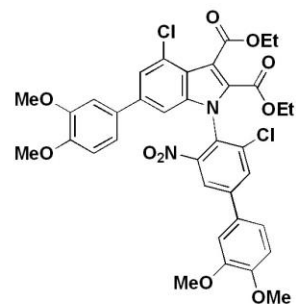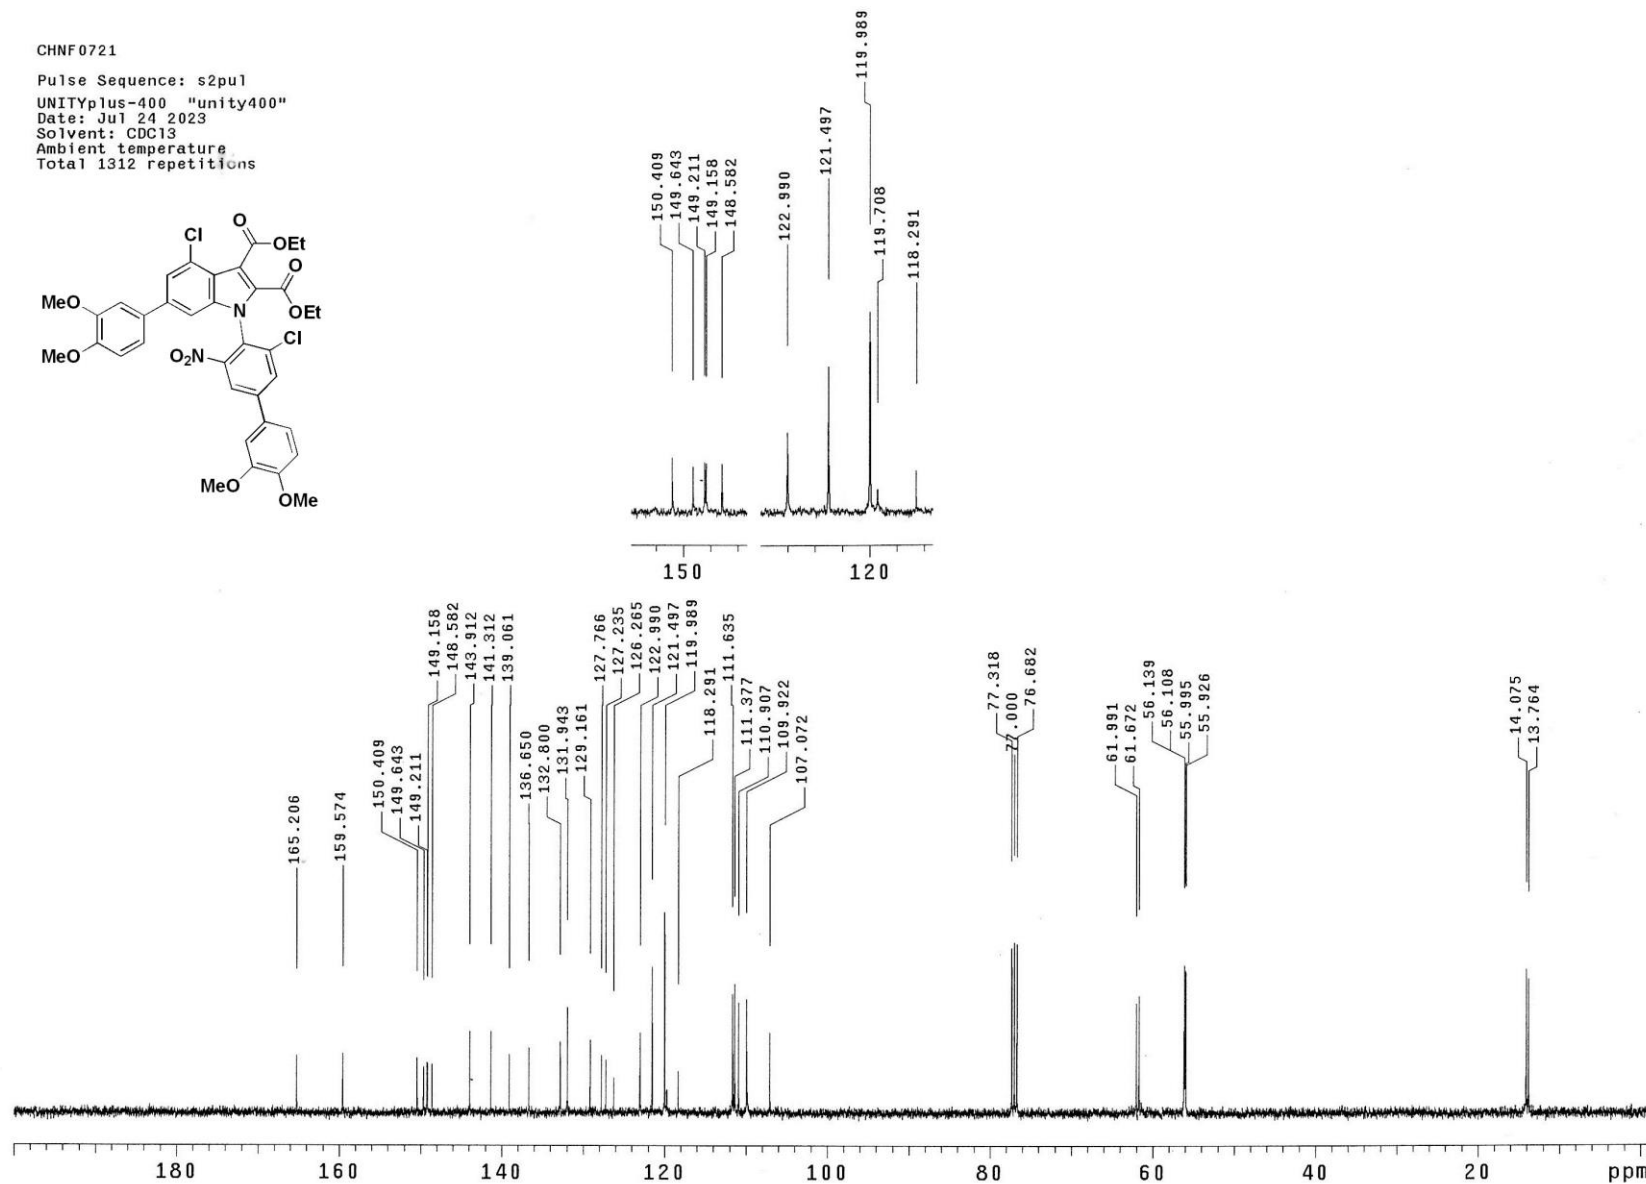

# Compound 4ad (<sup>1</sup>H-NMR spectral data)

CHNF0731

Pulse Sequence: s2pu1  
 UNITYplus-400 "unity400"  
 Date: Aug 16 2023  
 Solvent: CDCl<sub>3</sub>  
 Ambient temperature  
 Total 32 repetitions

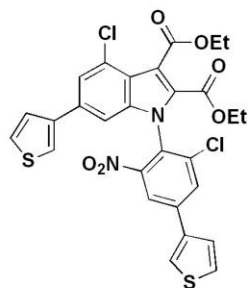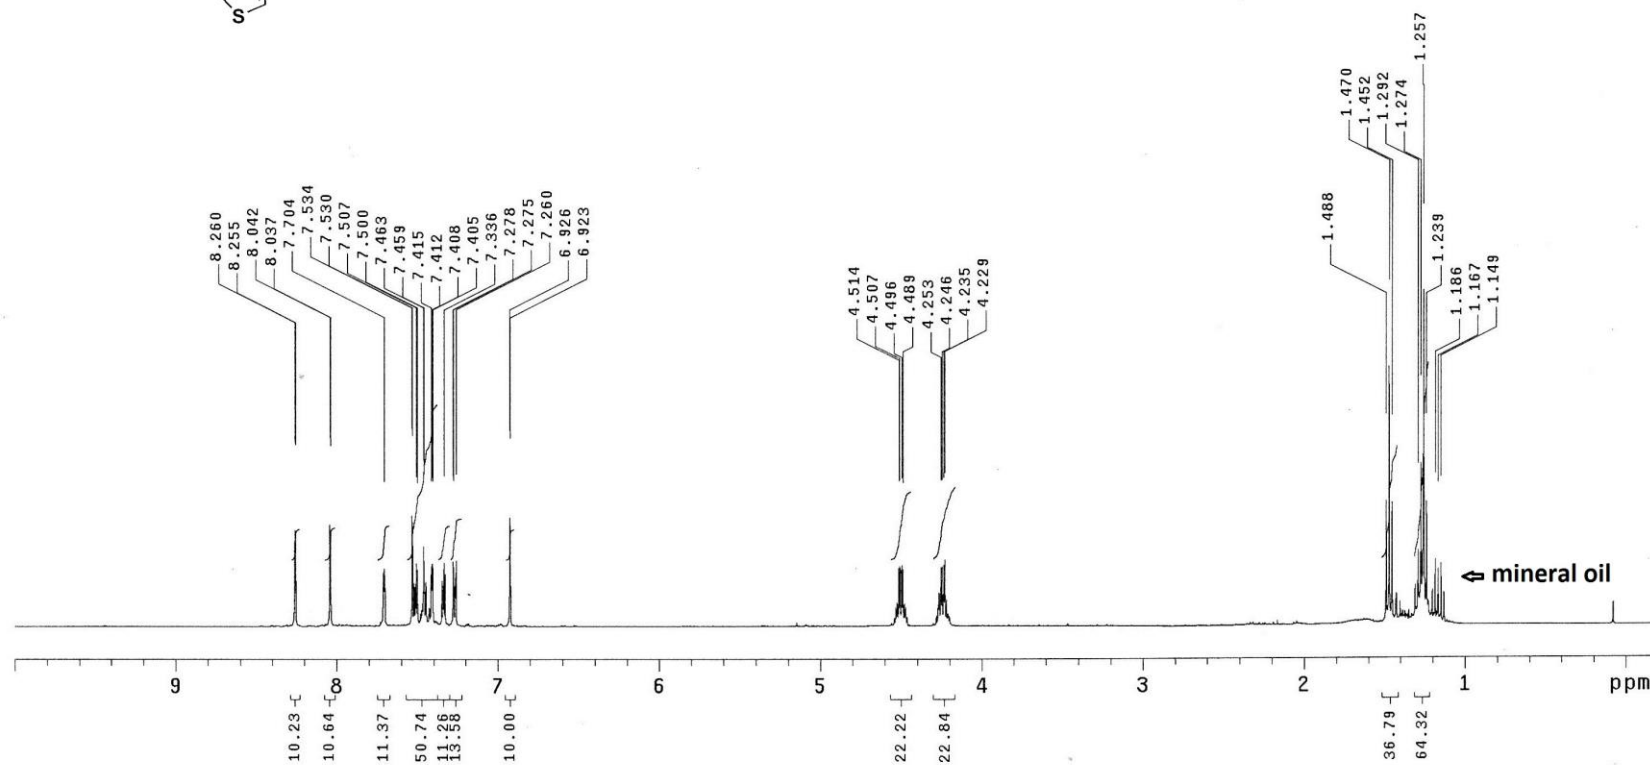

# Compound 4ad (<sup>13</sup>C-NMR spectral data)

CHNF0731

Pulse Sequence: s2pu1  
 UNITYplus-400 "unity400"  
 Date: Aug 16 2023  
 Solvent: CDCl<sub>3</sub>  
 Ambient temperature  
 Total 1600 repetitions

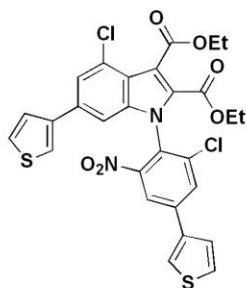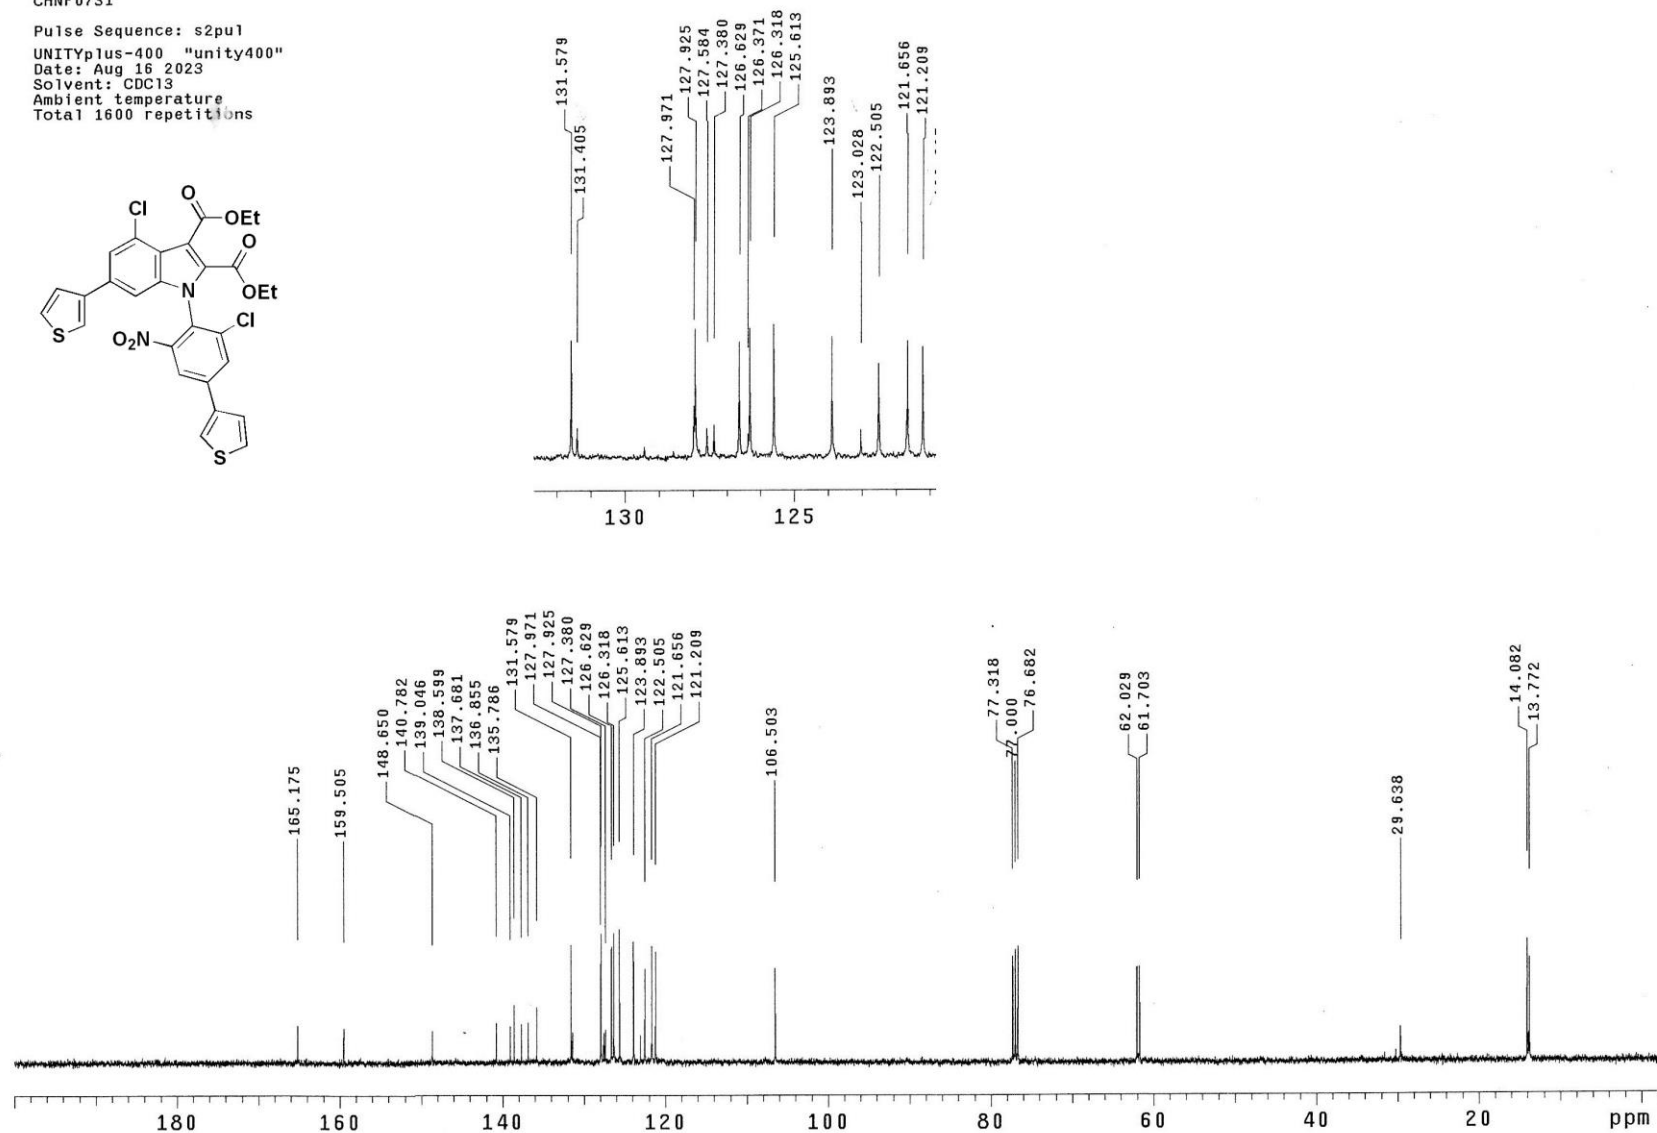



# Compound 4ae (<sup>1</sup>H-NMR spectral data)

CHNF0812  
Pulse Sequence: s2pu1  
UNITYplus-400 "unity400"  
Date: Aug 16 2023  
Solvent: CDCl<sub>3</sub>  
Ambient temperature  
Total 32 repetitions

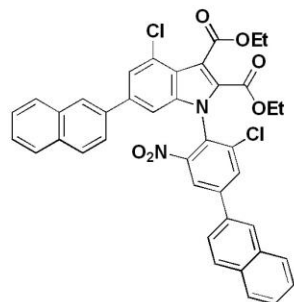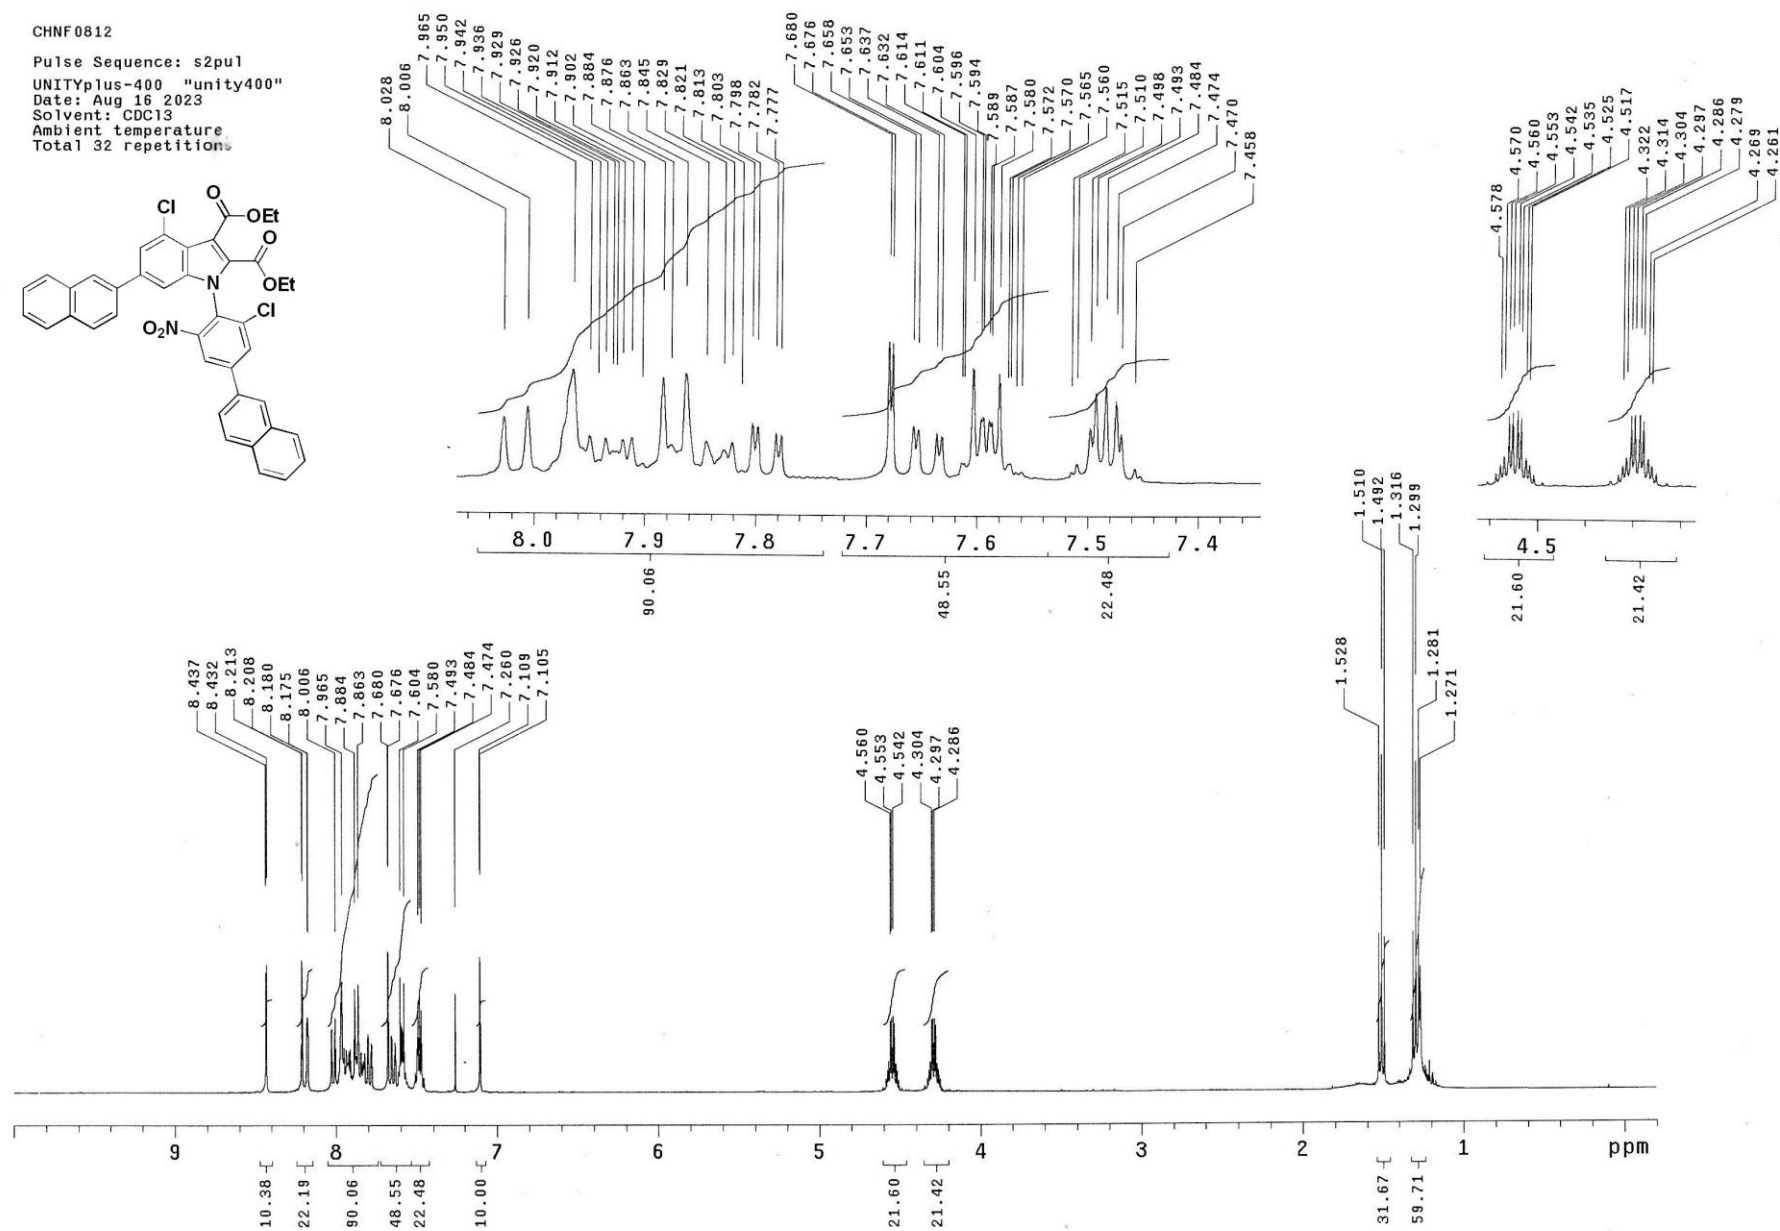

# Compound 4ae (<sup>13</sup>C-NMR spectral data)

CHNF0812

Pulse Sequence: s2pu1

UNITYplus-400 "unity400"

Date: Aug 16 2023

Solvent: CDCl<sub>3</sub>

Ambient temperature

Total 2960 repetitions

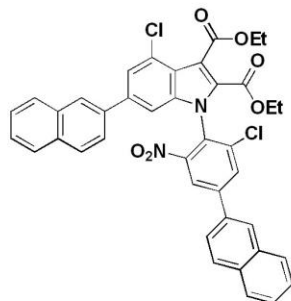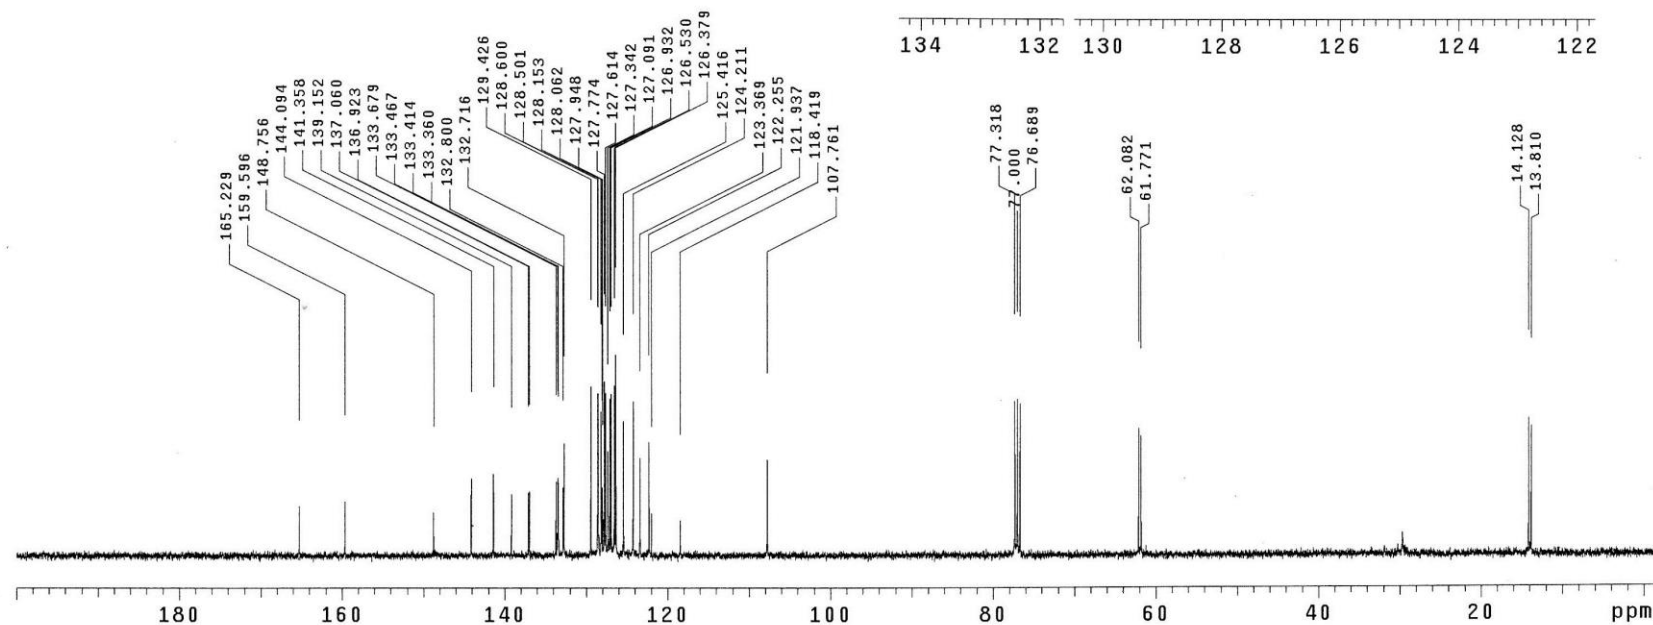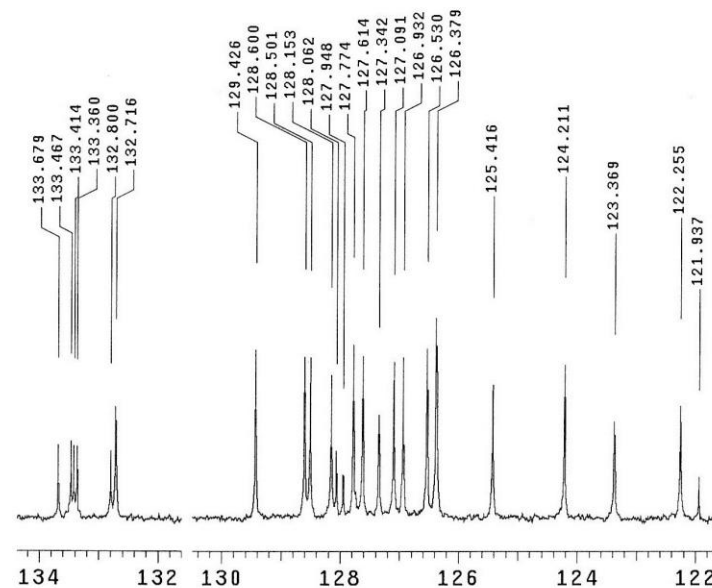

# Compound 4af (<sup>1</sup>H-NMR spectral data)

CHNF0918

Pulse Sequence: s2pu1  
 UNITYplus-400 "unity400"  
 Date: Sep 19 2023  
 Solvent: CDCl<sub>3</sub>  
 Ambient temperature  
 Total 32 repetition

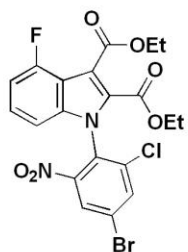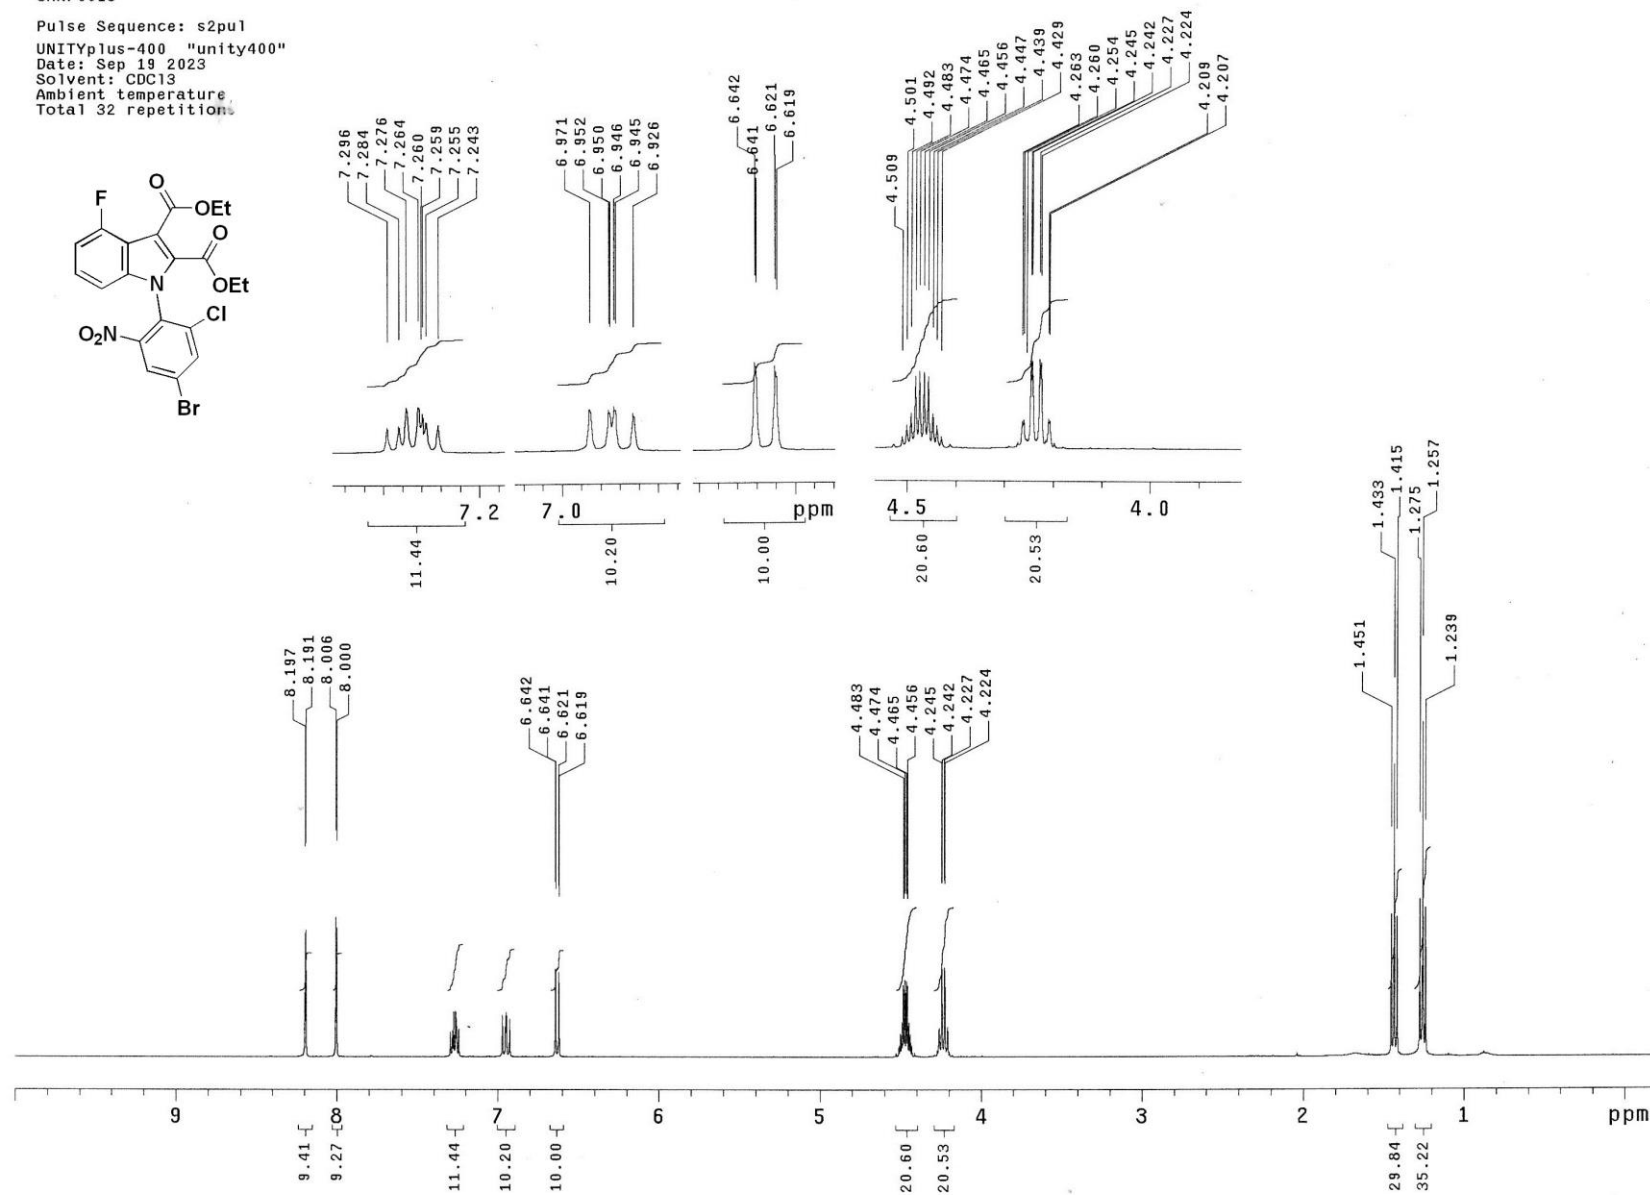

# Compound 4af (<sup>13</sup>C-NMR spectral data)

CHNF0918

Pulse Sequence: s2pu1

UNITYplus-400 "unity400"

Date: Sep 19 2023

Solvent: CDCl<sub>3</sub>

Ambient temperature

Total 2816 repetitions

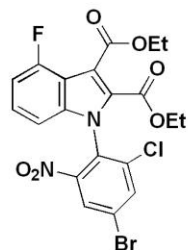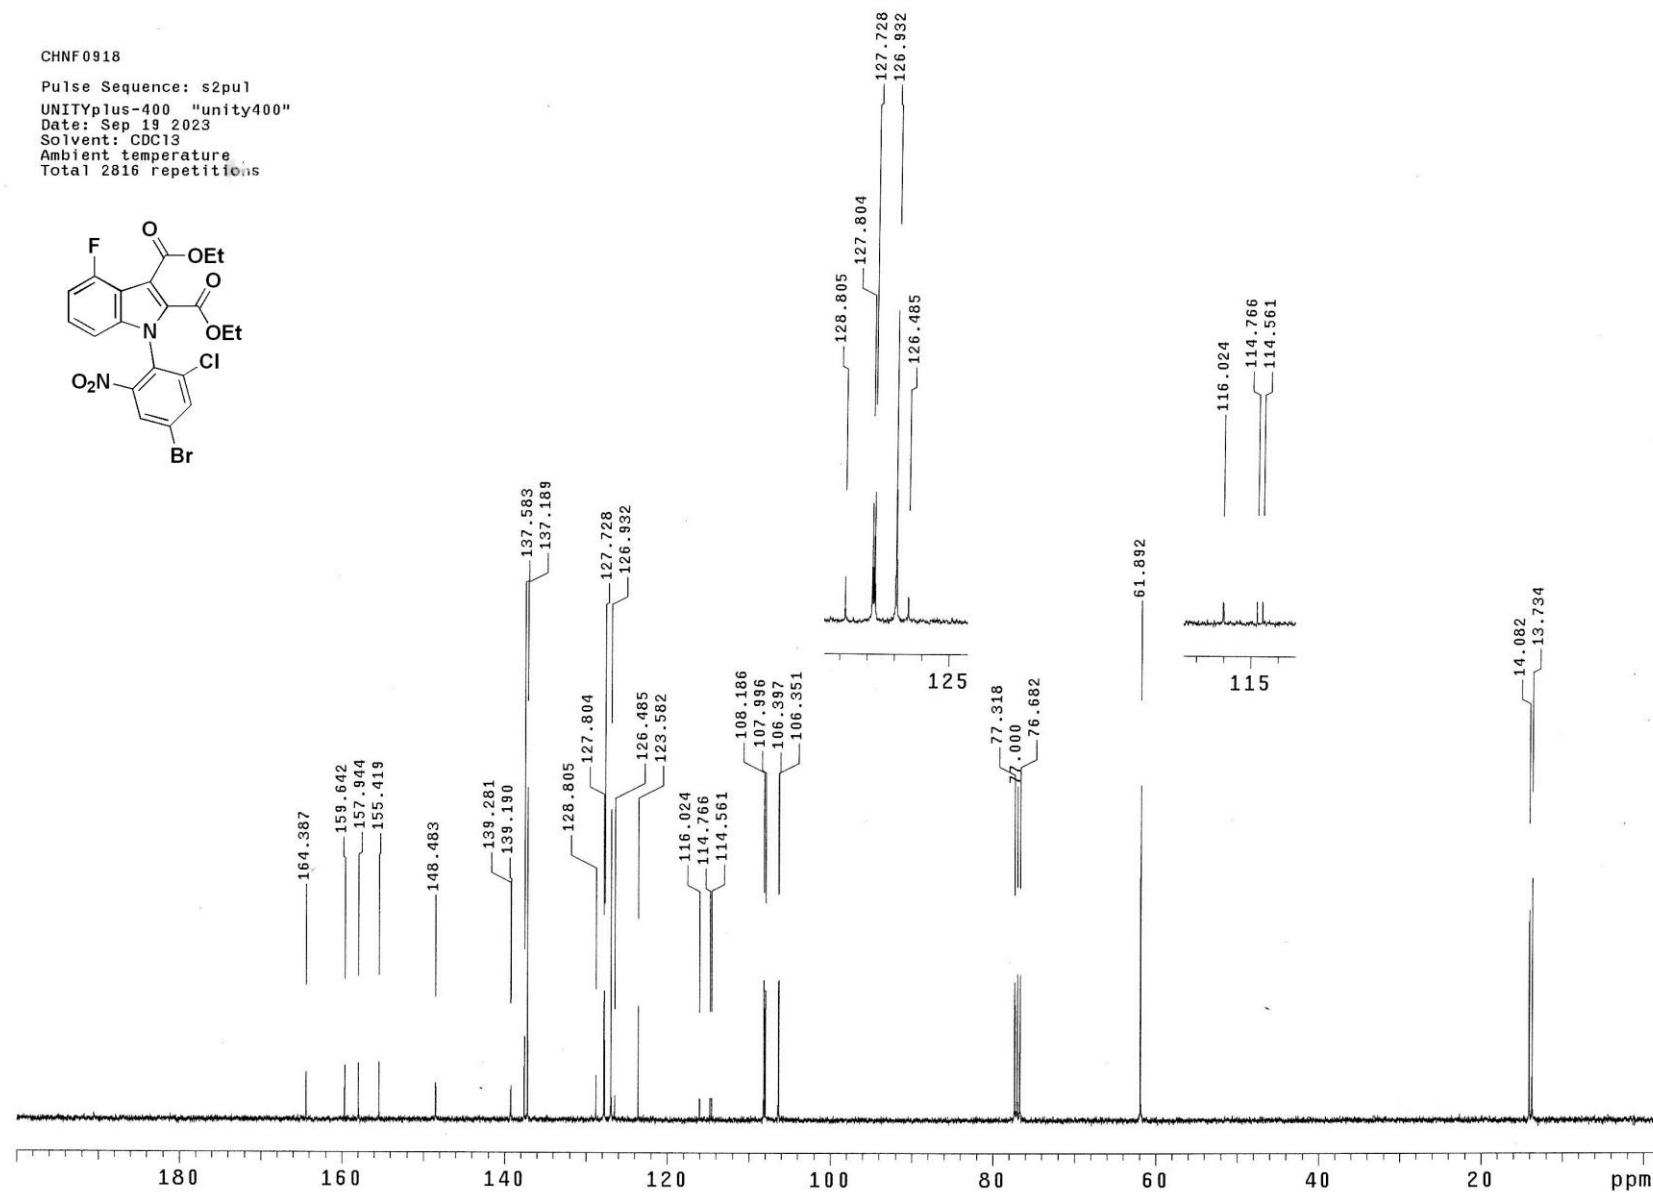

# Compound 4af (<sup>19</sup>F-NMR spectral data)

4af

Pulse Sequence: s2pu1  
Mercury-400BB "MerPlus400"  
Date: Jan 19 2024  
Solvent: cdcl3  
Ambient temperature  
Total 44 repetitions

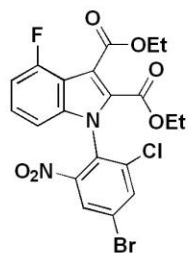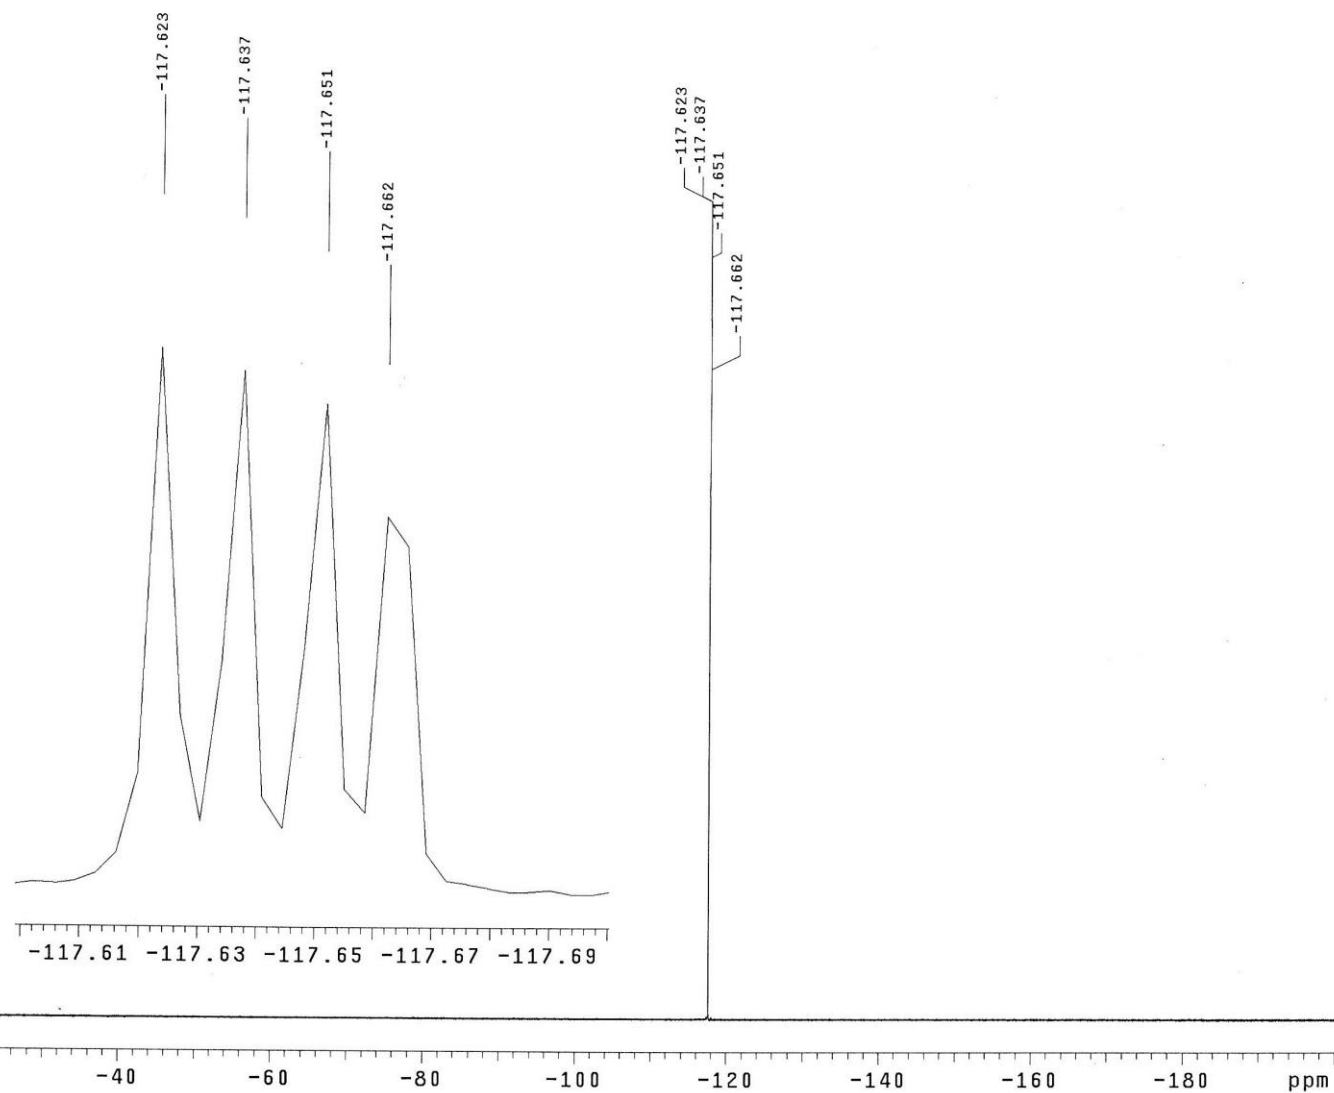

# Compound 4ag (<sup>1</sup>H-NMR spectral data)

CHNF0906

Pulse Sequence: s2pu1  
 UNITYplus-400 "unity400"  
 Date: Sep 7 2023  
 Solvent: CDCl<sub>3</sub>  
 Ambient temperature  
 Total 32 repetitions

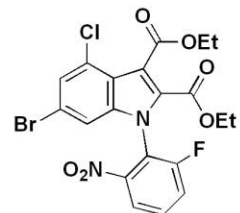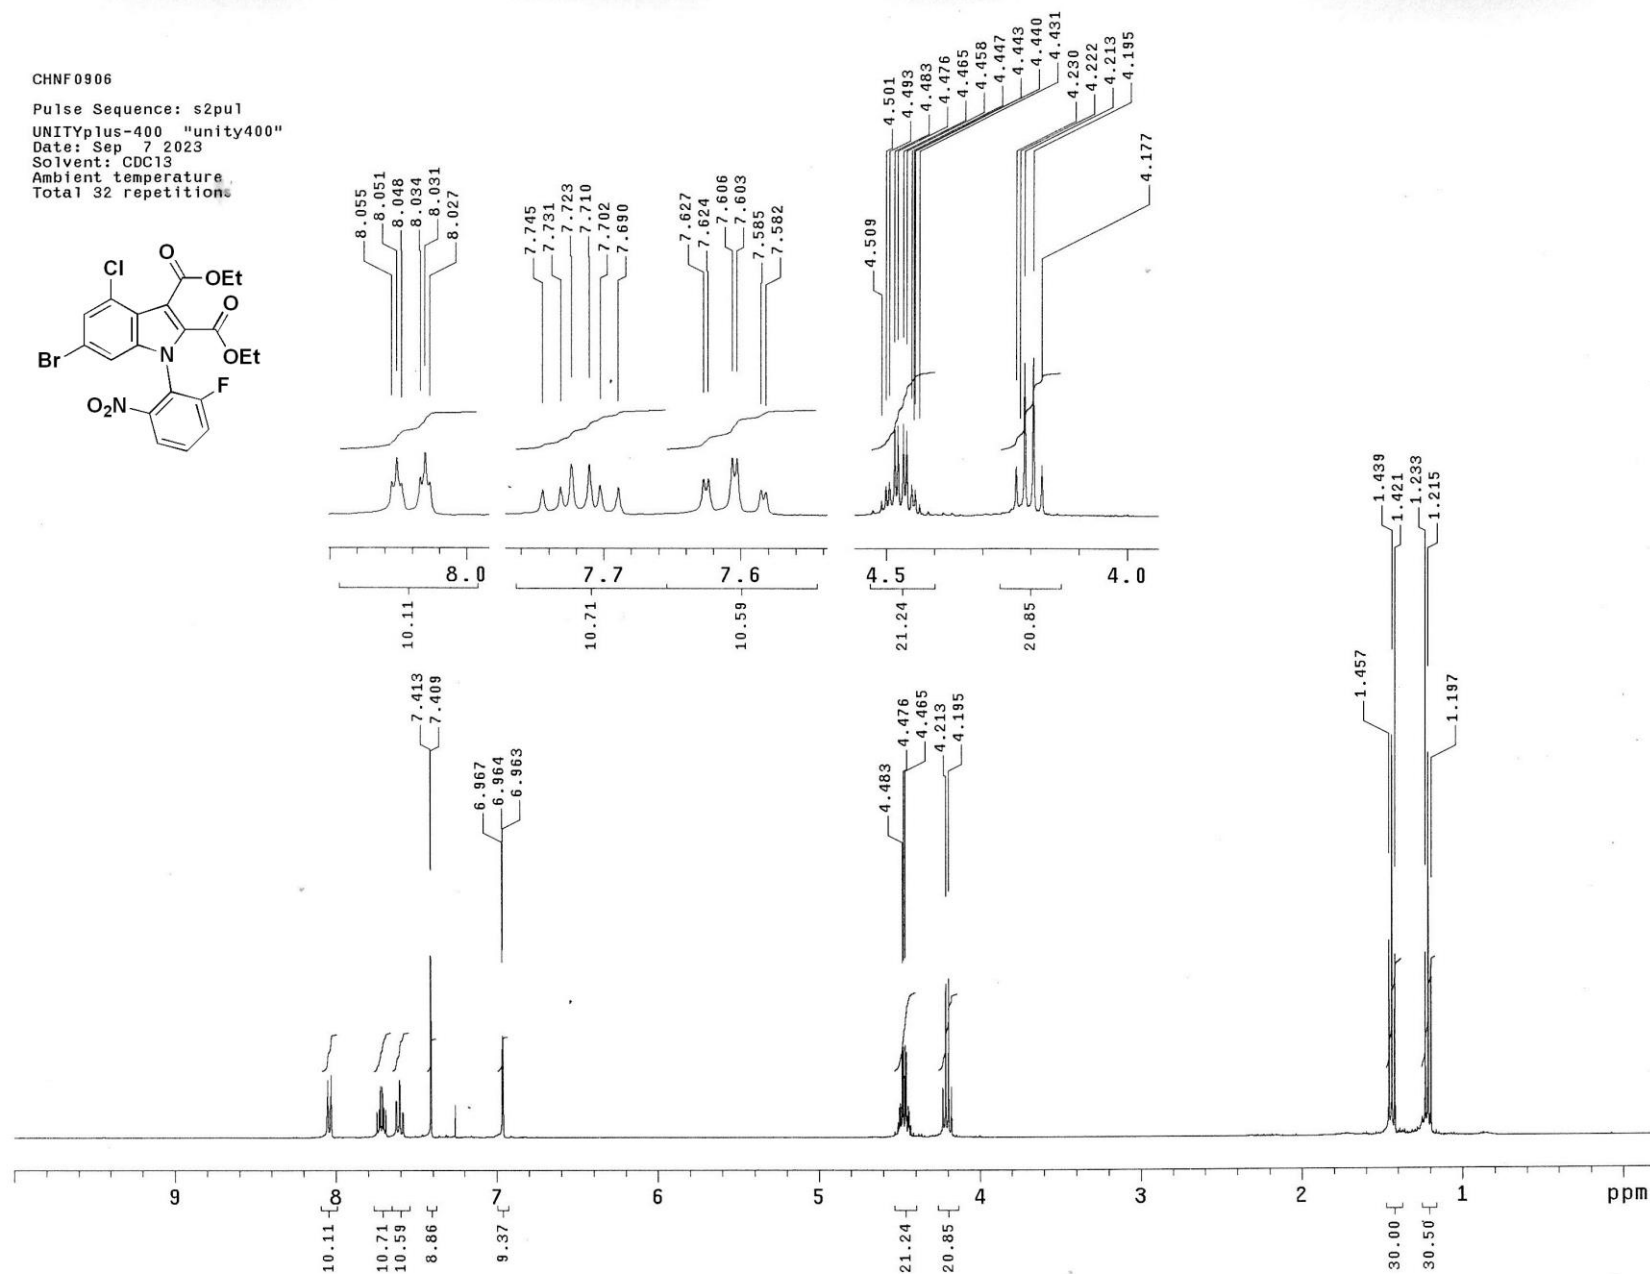

# Compound 4ag (<sup>13</sup>C-NMR spectral data)

CHNF0906

Pulse Sequence: s2pu1  
 UNITYplus-400 "unity400"  
 Date: Sep 7 2023  
 Solvent: CDCl<sub>3</sub>  
 Ambient temperature  
 Total 3120 repetitions

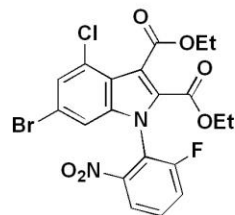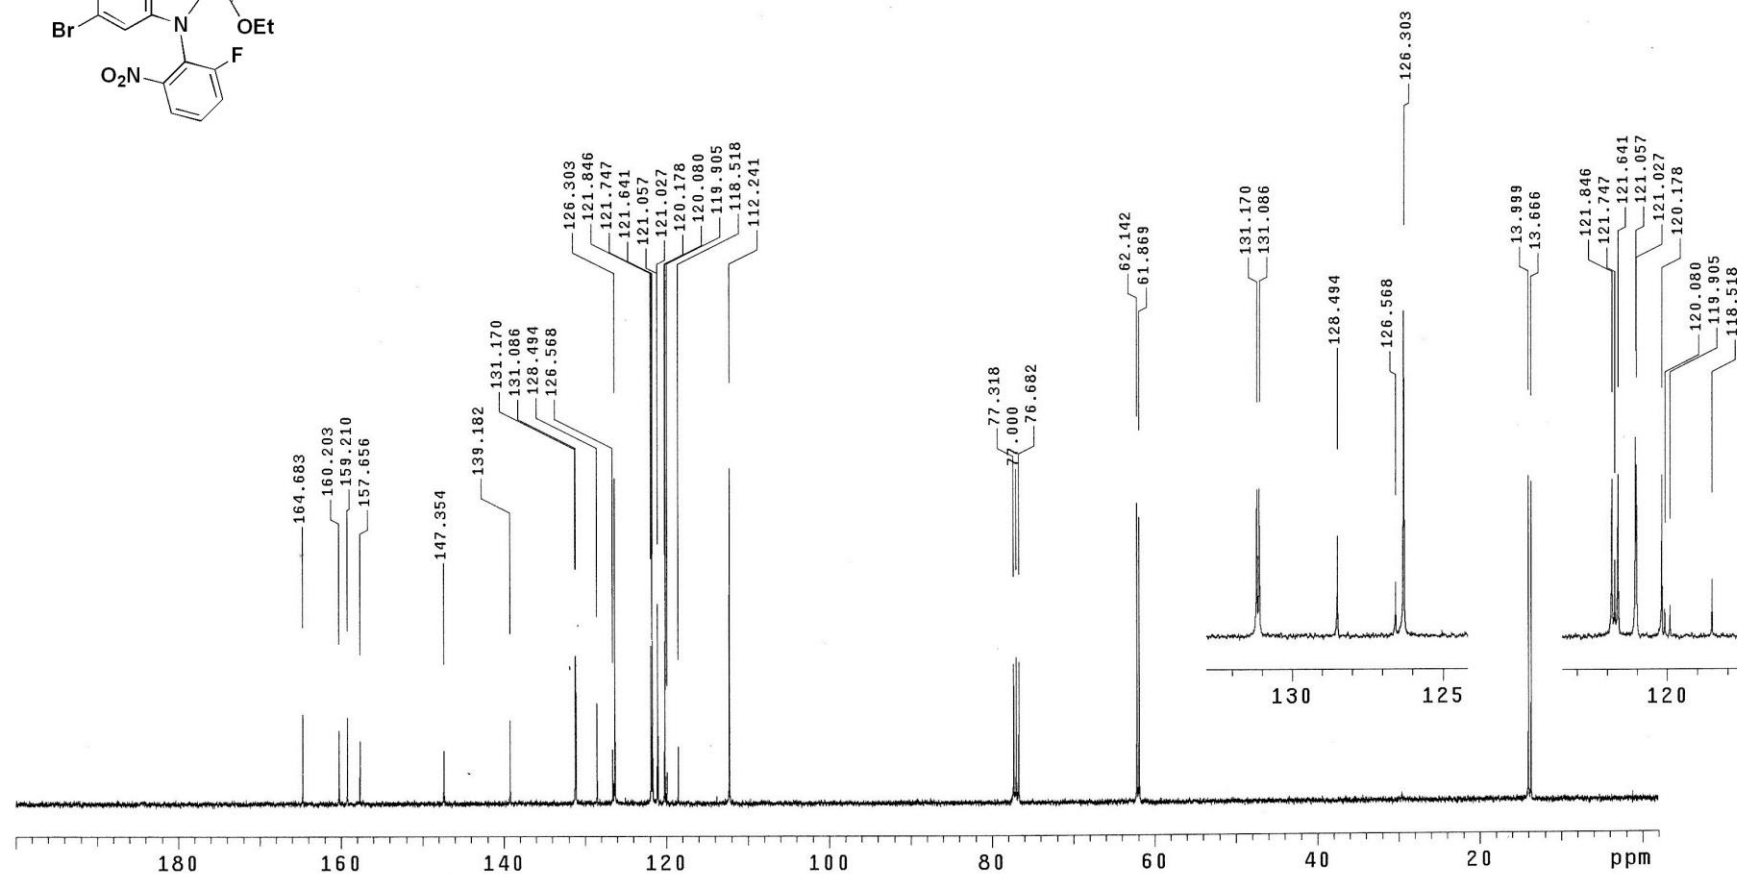

# Compound 4ag (<sup>19</sup>F-NMR spectral data)

4ag

Pulse Sequence: s2pu1  
Mercury-400BB "MerPlus400"  
Date: Jan 19 2024  
Solvent: cdcl3  
Ambient temperature  
Total 32 repetitions

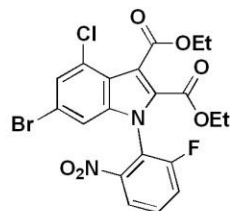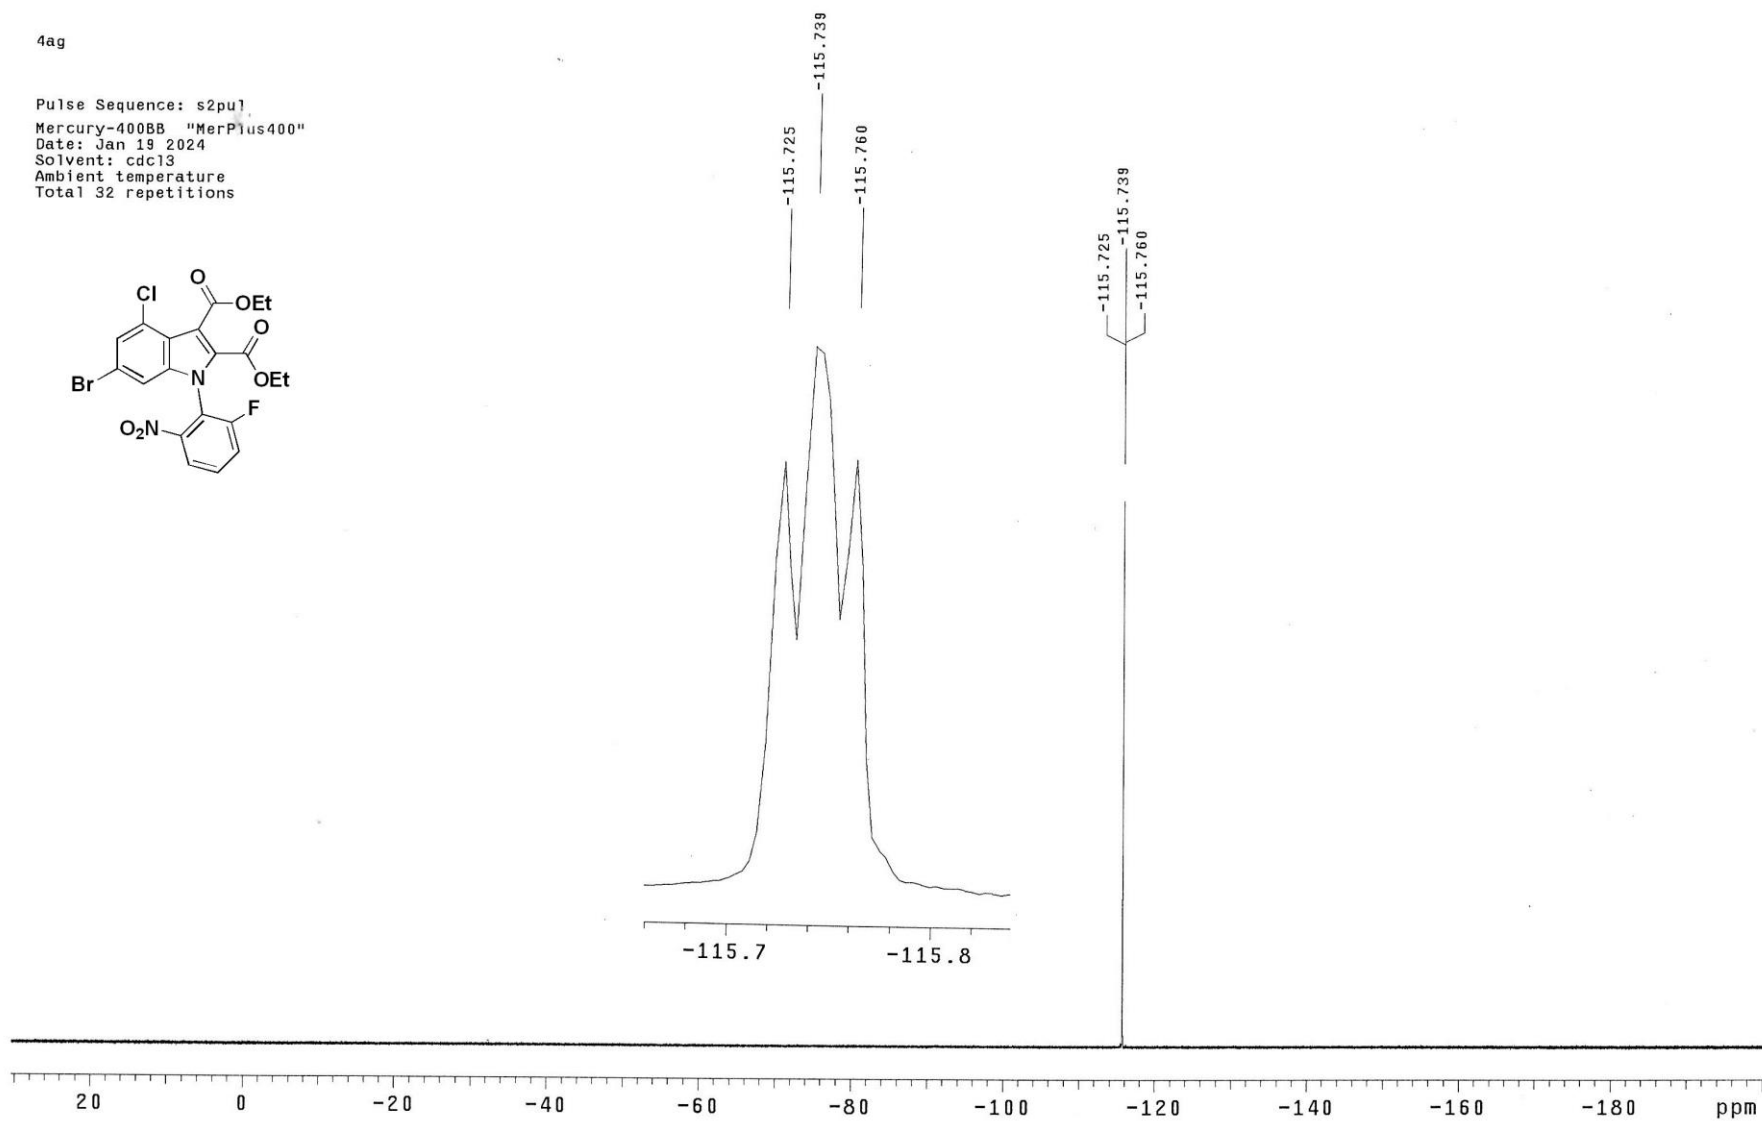



# Compound 4ah (<sup>1</sup>H-NMR spectral data)

CHNF0131

Pulse Sequence: s2pu1  
 UNITYplus-400 "unity400"  
 Date: Sep 7 2023  
 Solvent: CDCl<sub>3</sub>  
 Ambient temperature  
 Total 32 repetitions

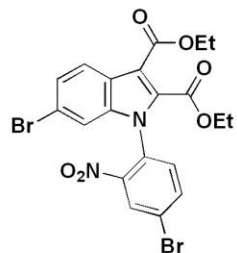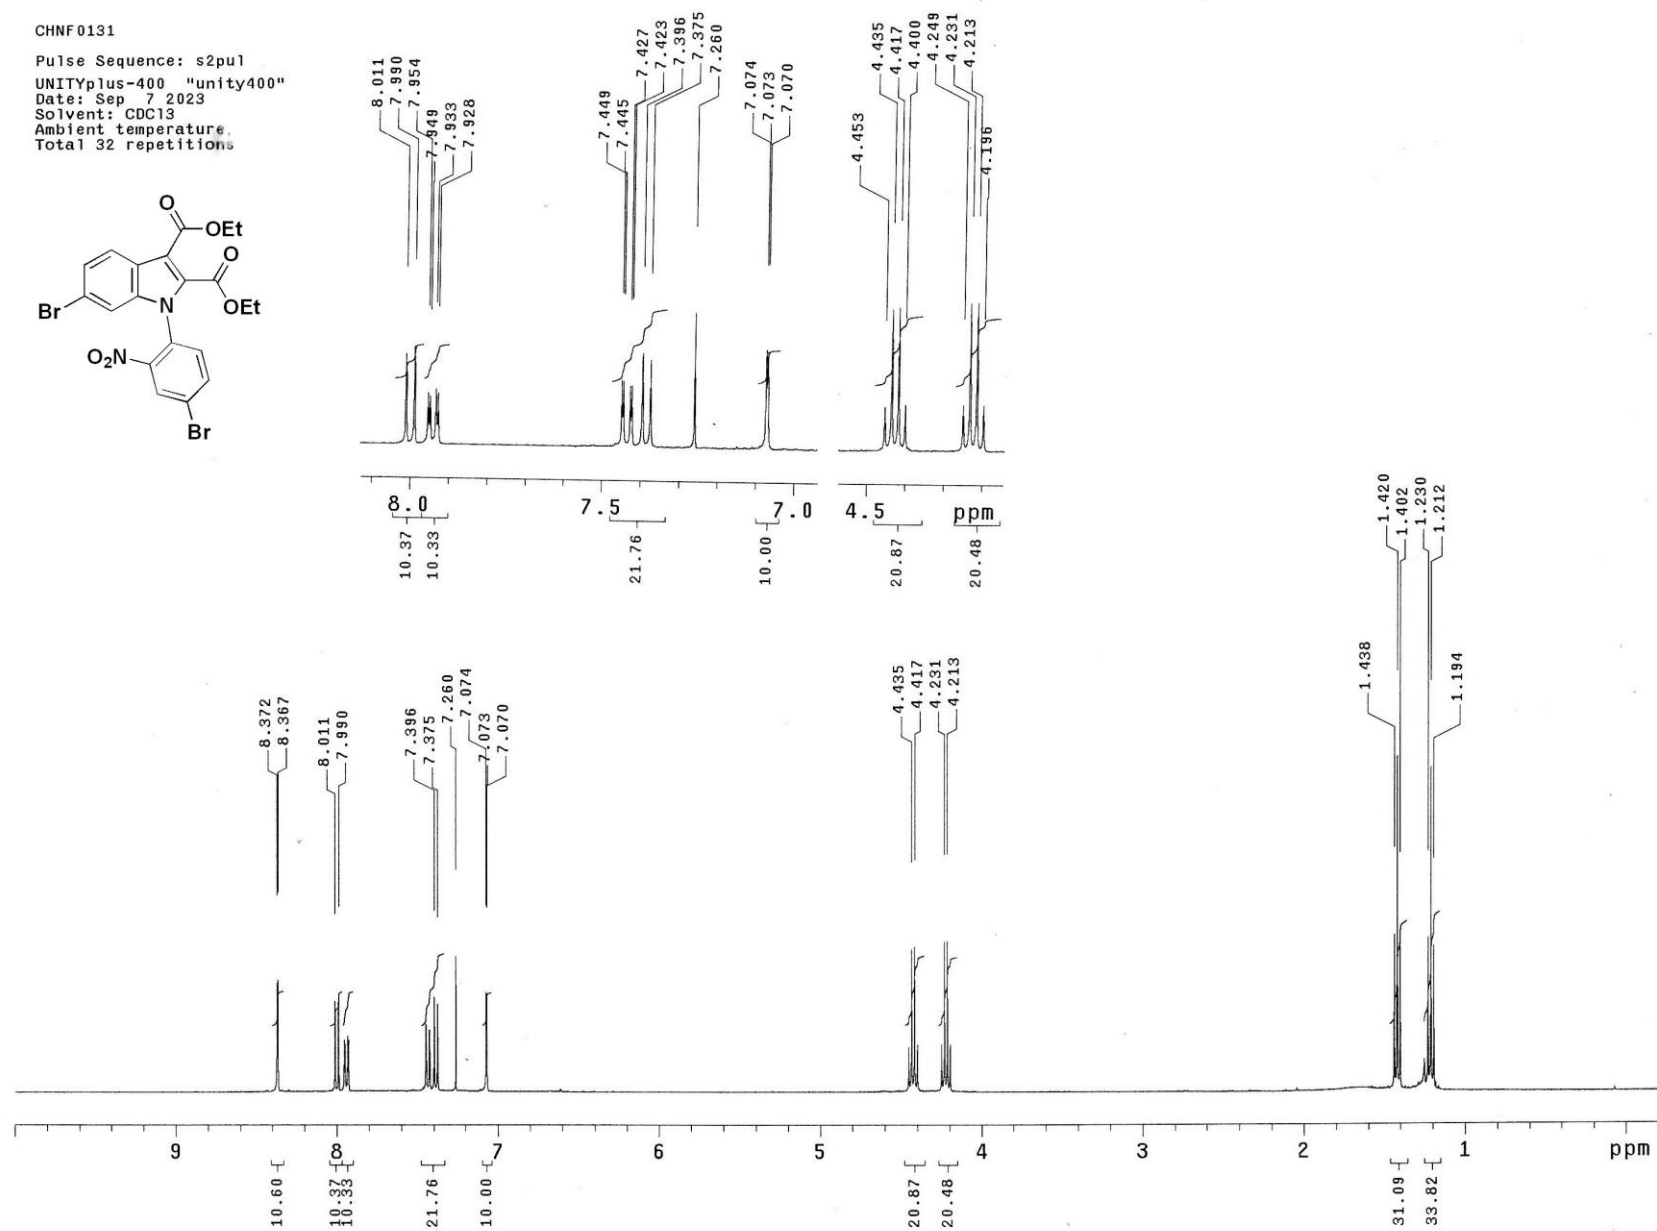

# Compound 4ah (<sup>13</sup>C-NMR spectral data)

CHNF0131

Pulse Sequence: s2pu1  
 UNITYplus-400 "unity400"  
 Date: Sep 7 2023  
 Solvent: CDCl<sub>3</sub>  
 Ambient temperature  
 Total 3056 repetitions

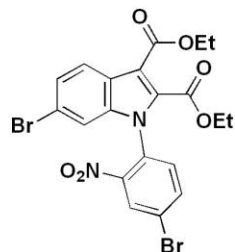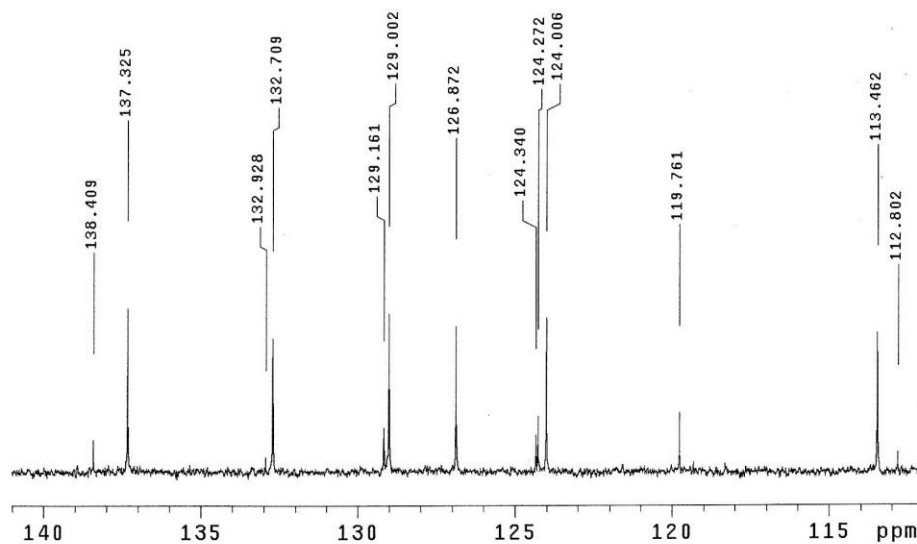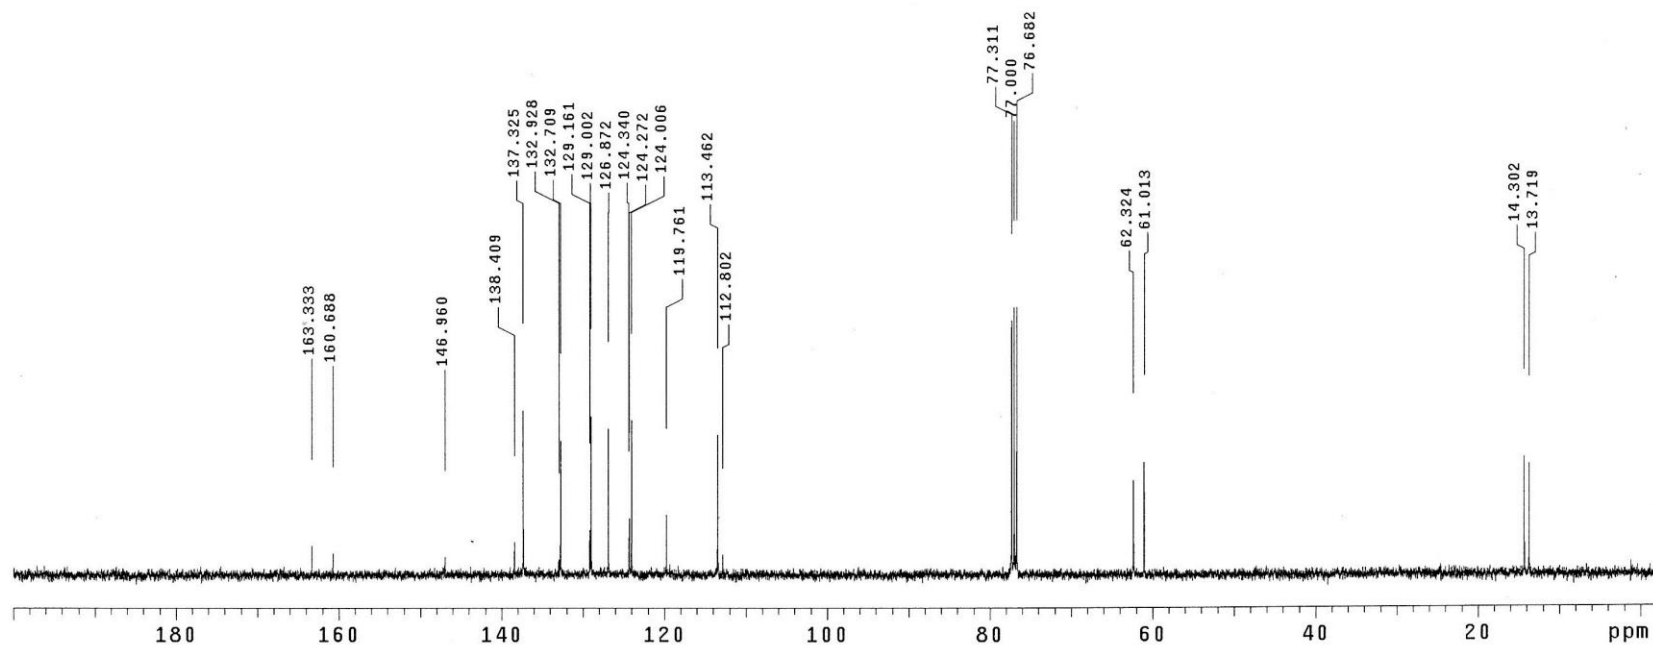

# Compound 5a (<sup>1</sup>H-NMR spectral data)

CHNF0317

Pulse Sequence: s2pu1

UNITYplus-400 "unity400"

Date: Mar 17 2023

Solvent: CDCl<sub>3</sub>

Ambient temperature

Total 32 repetitions

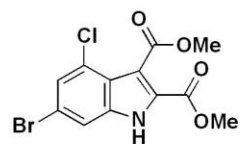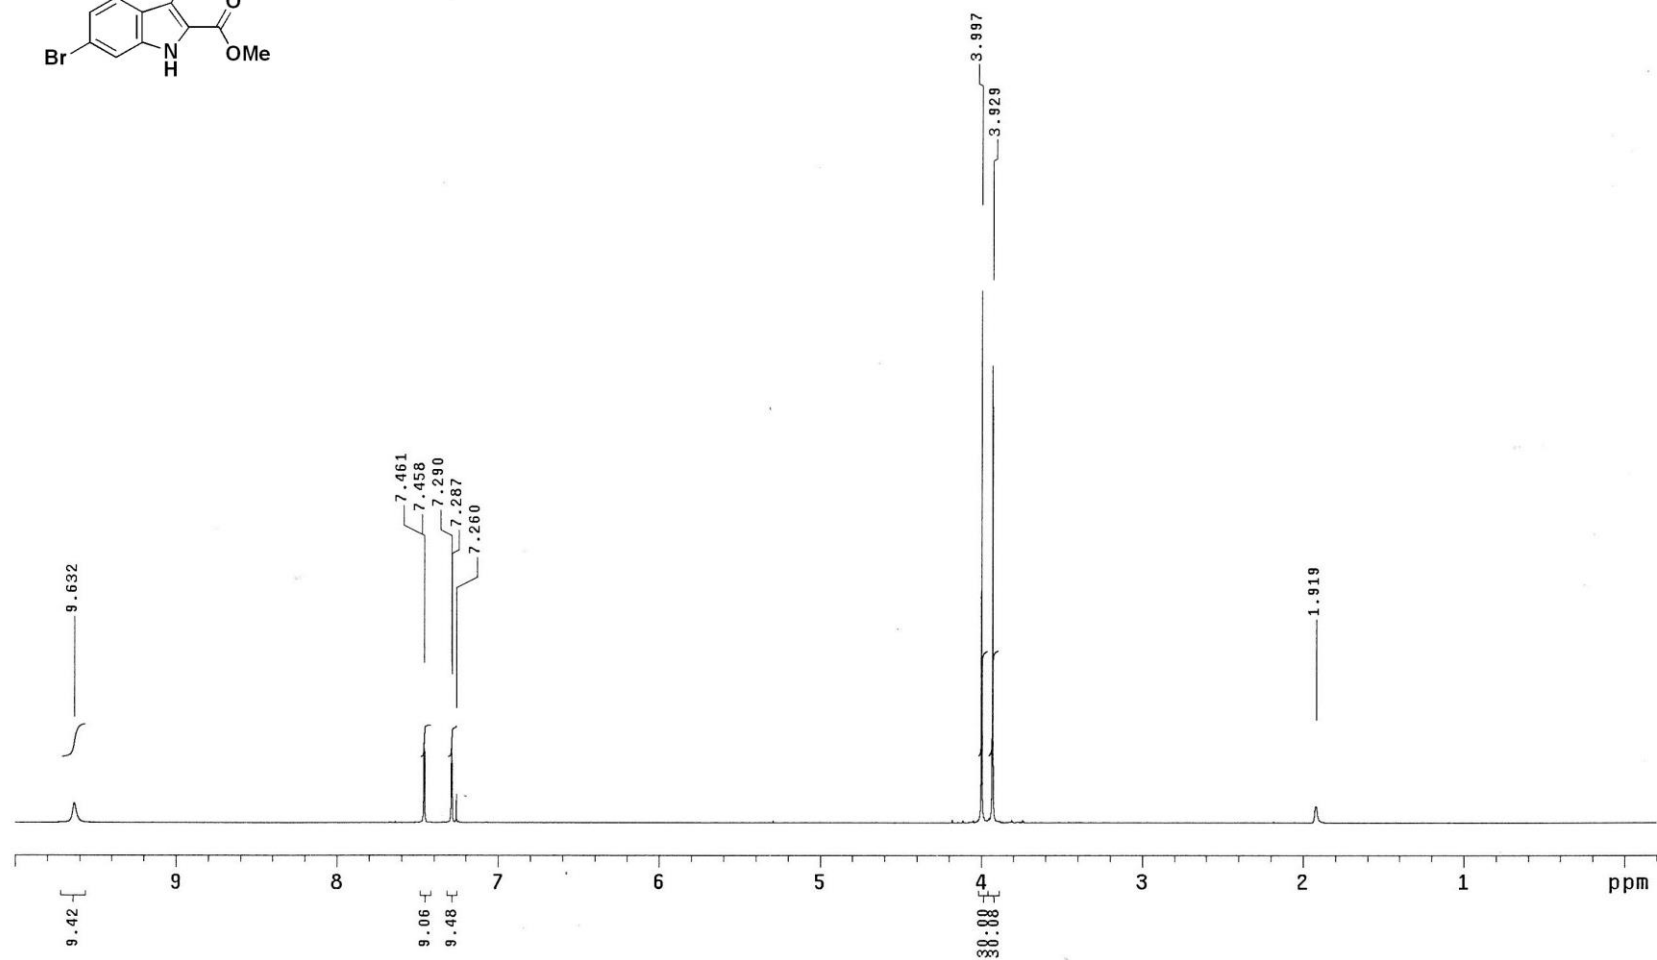

# Compound 5a ( $^{13}\text{C}$ -NMR spectral data)

CHNF0317

Pulse Sequence: s2pu1  
UNITYplus-400 "unity400"  
Date: Mar 17 2023  
Solvent: CDCl<sub>3</sub>  
Ambient temperature  
Total 2720 repetitions

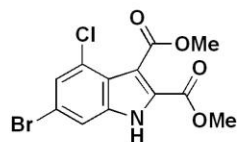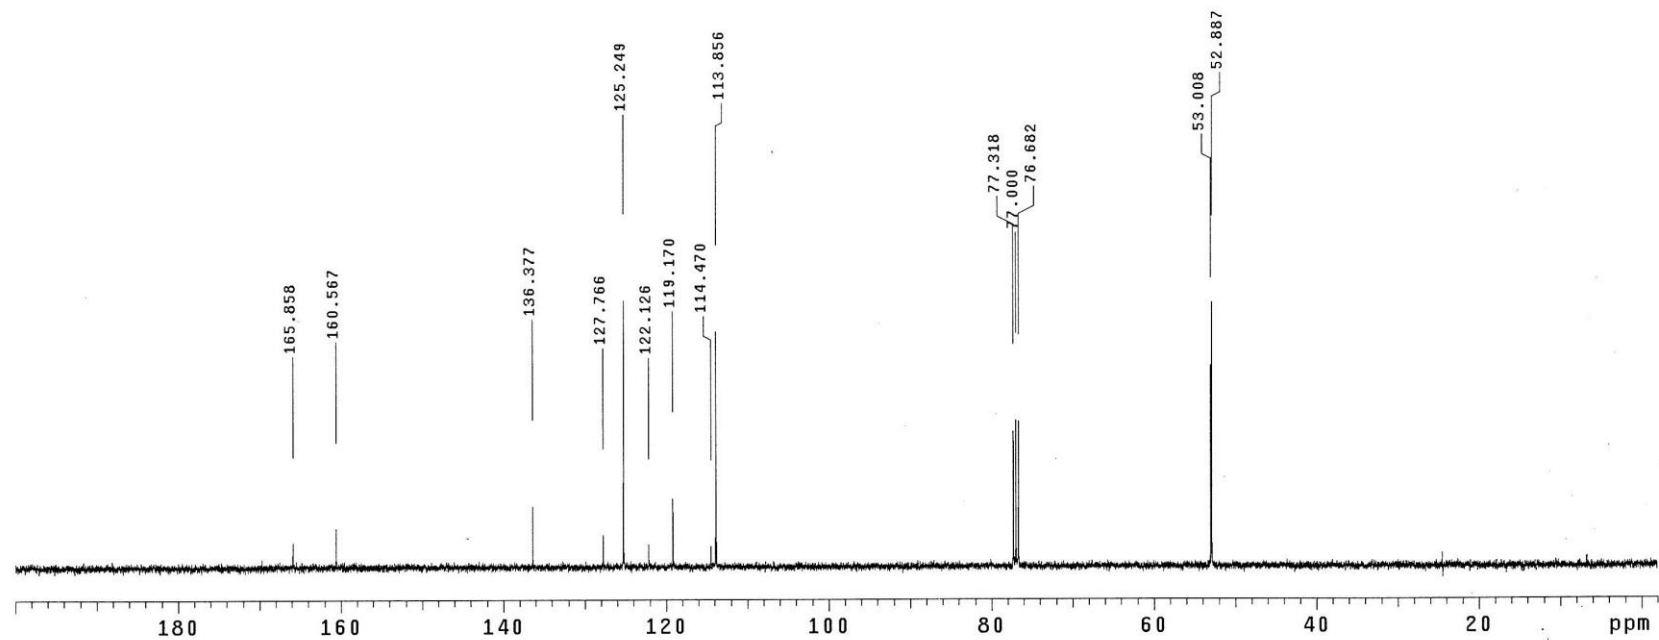

# Compound 5b (<sup>1</sup>H-NMR spectral data)

CHNF0315

Pulse Sequence: s2pu1

UNITYplus-400 "unity400"

Date: Mar 16 2023

Solvent: CDCl<sub>3</sub>

Ambient temperature

Total 32 repetitions

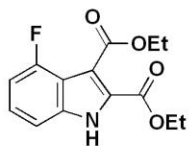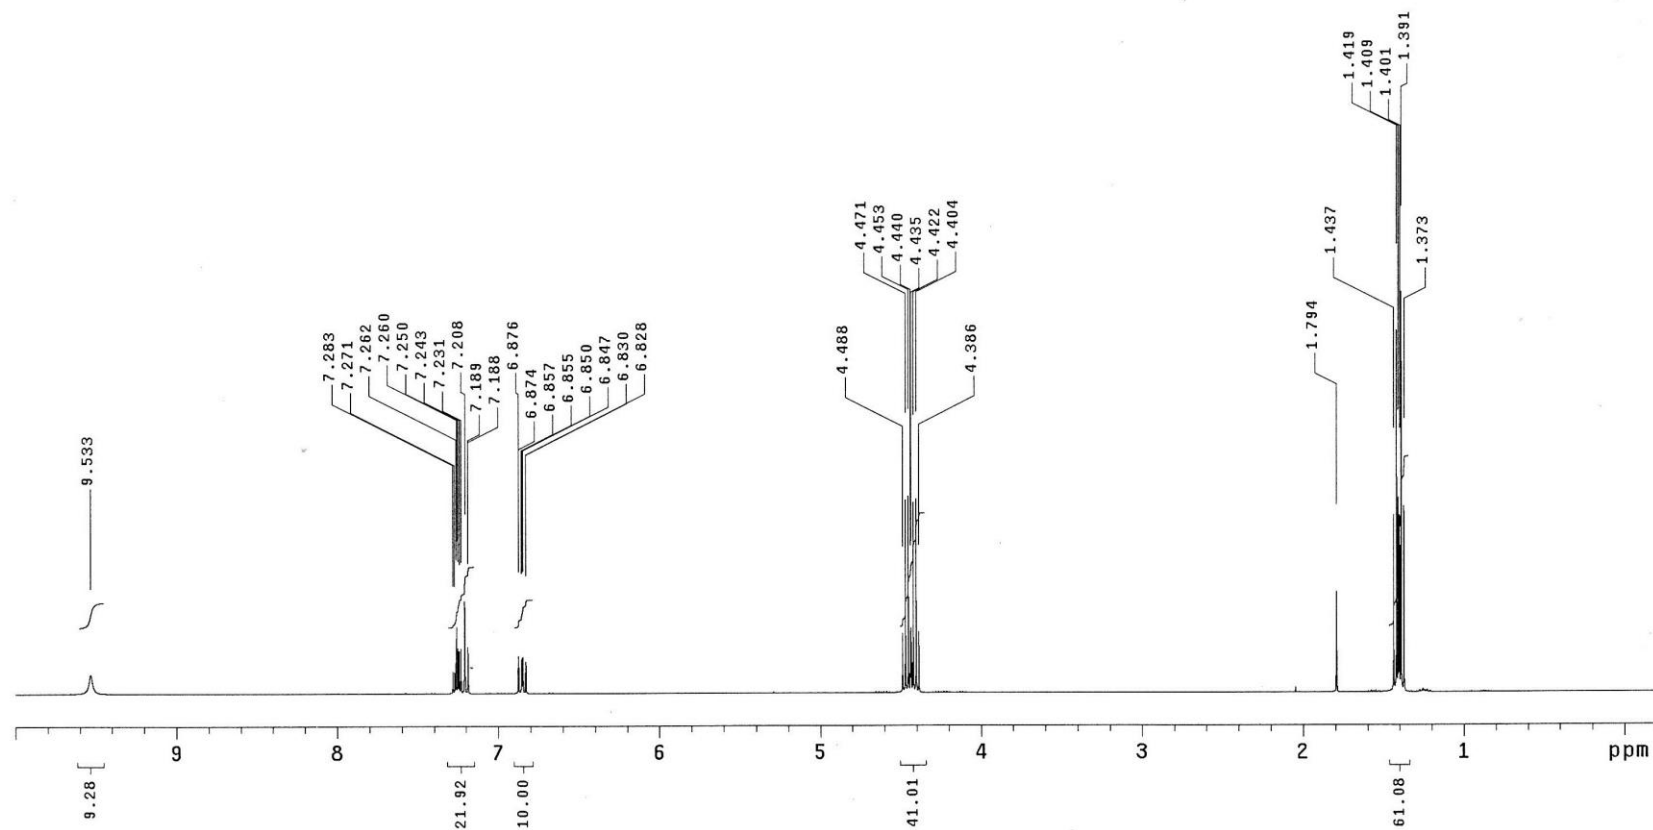

# Compound 5b (<sup>13</sup>C-NMR spectral data)

CHNF0315

Pulse Sequence: s2pu1

UNITYplus-400 "unity400"

Date: Mar 16 2023

Solvent: CDCl<sub>3</sub>

Ambient temperature

Total 2640 repetitions

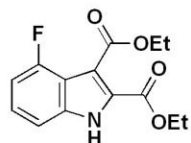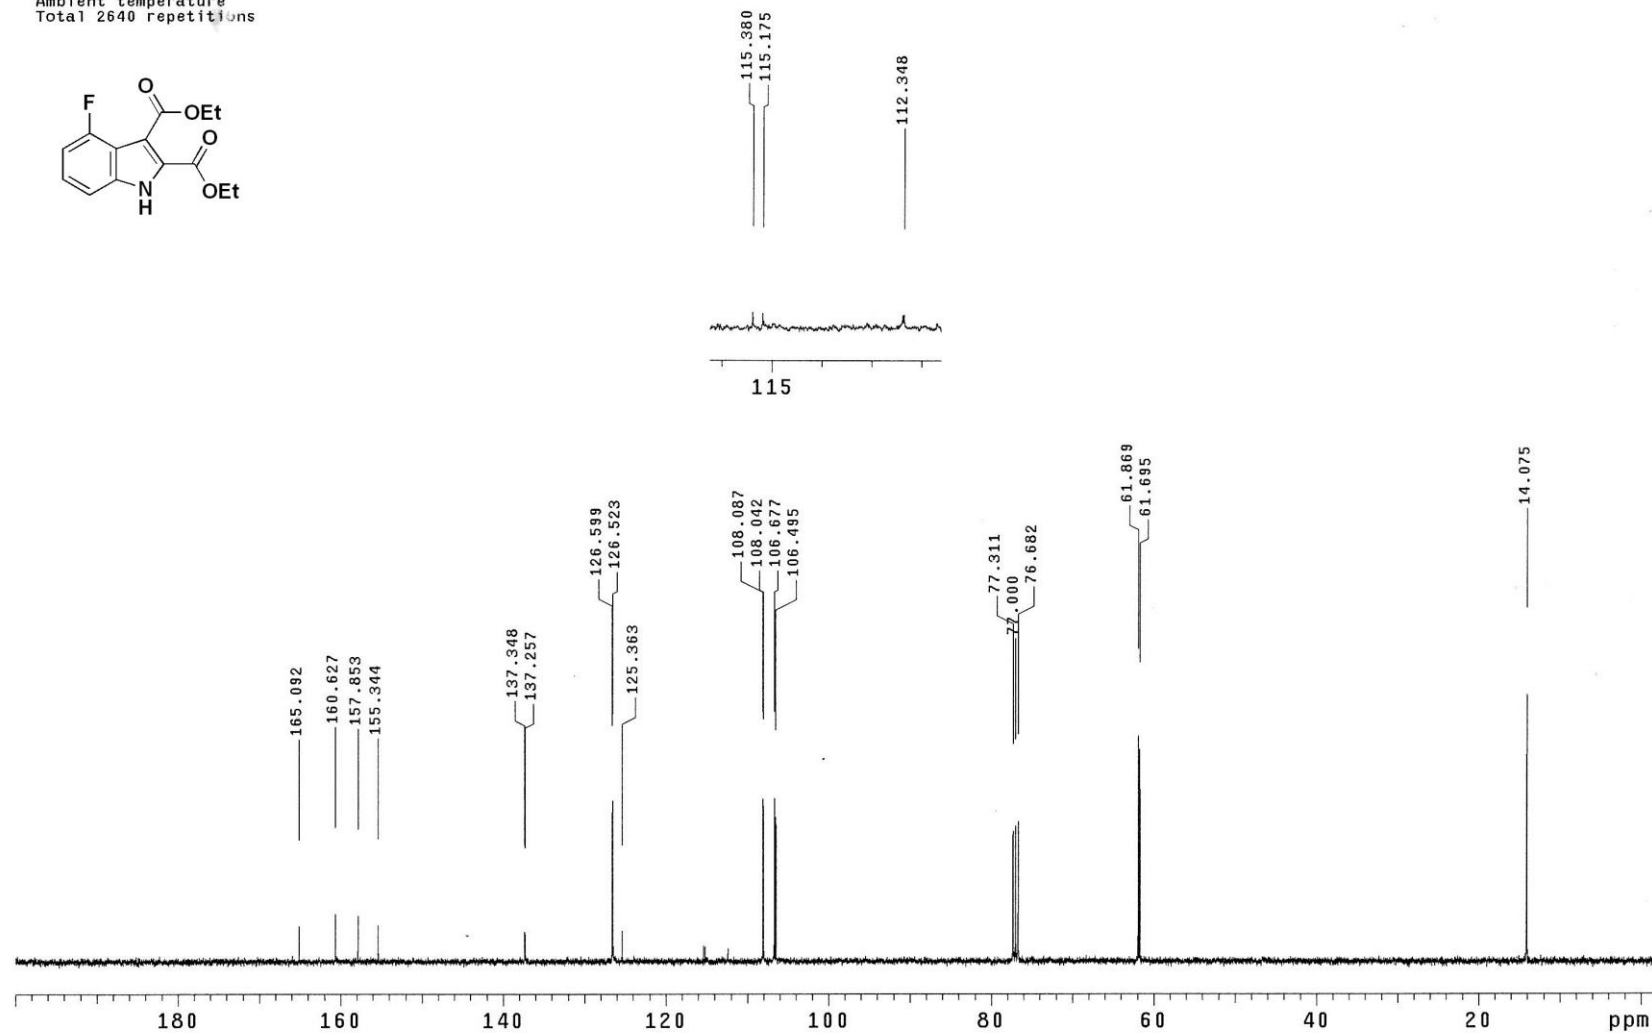

# Compound 5b ( $^{19}\text{F}$ -NMR spectral data)

5b

Pulse Sequence: s2pu1  
Mercury-400BB "MerPlus400"  
Date: Jan 19 2024  
Solvent: cdcl3  
Ambient temperature  
Total 48 repetitions

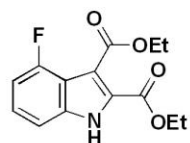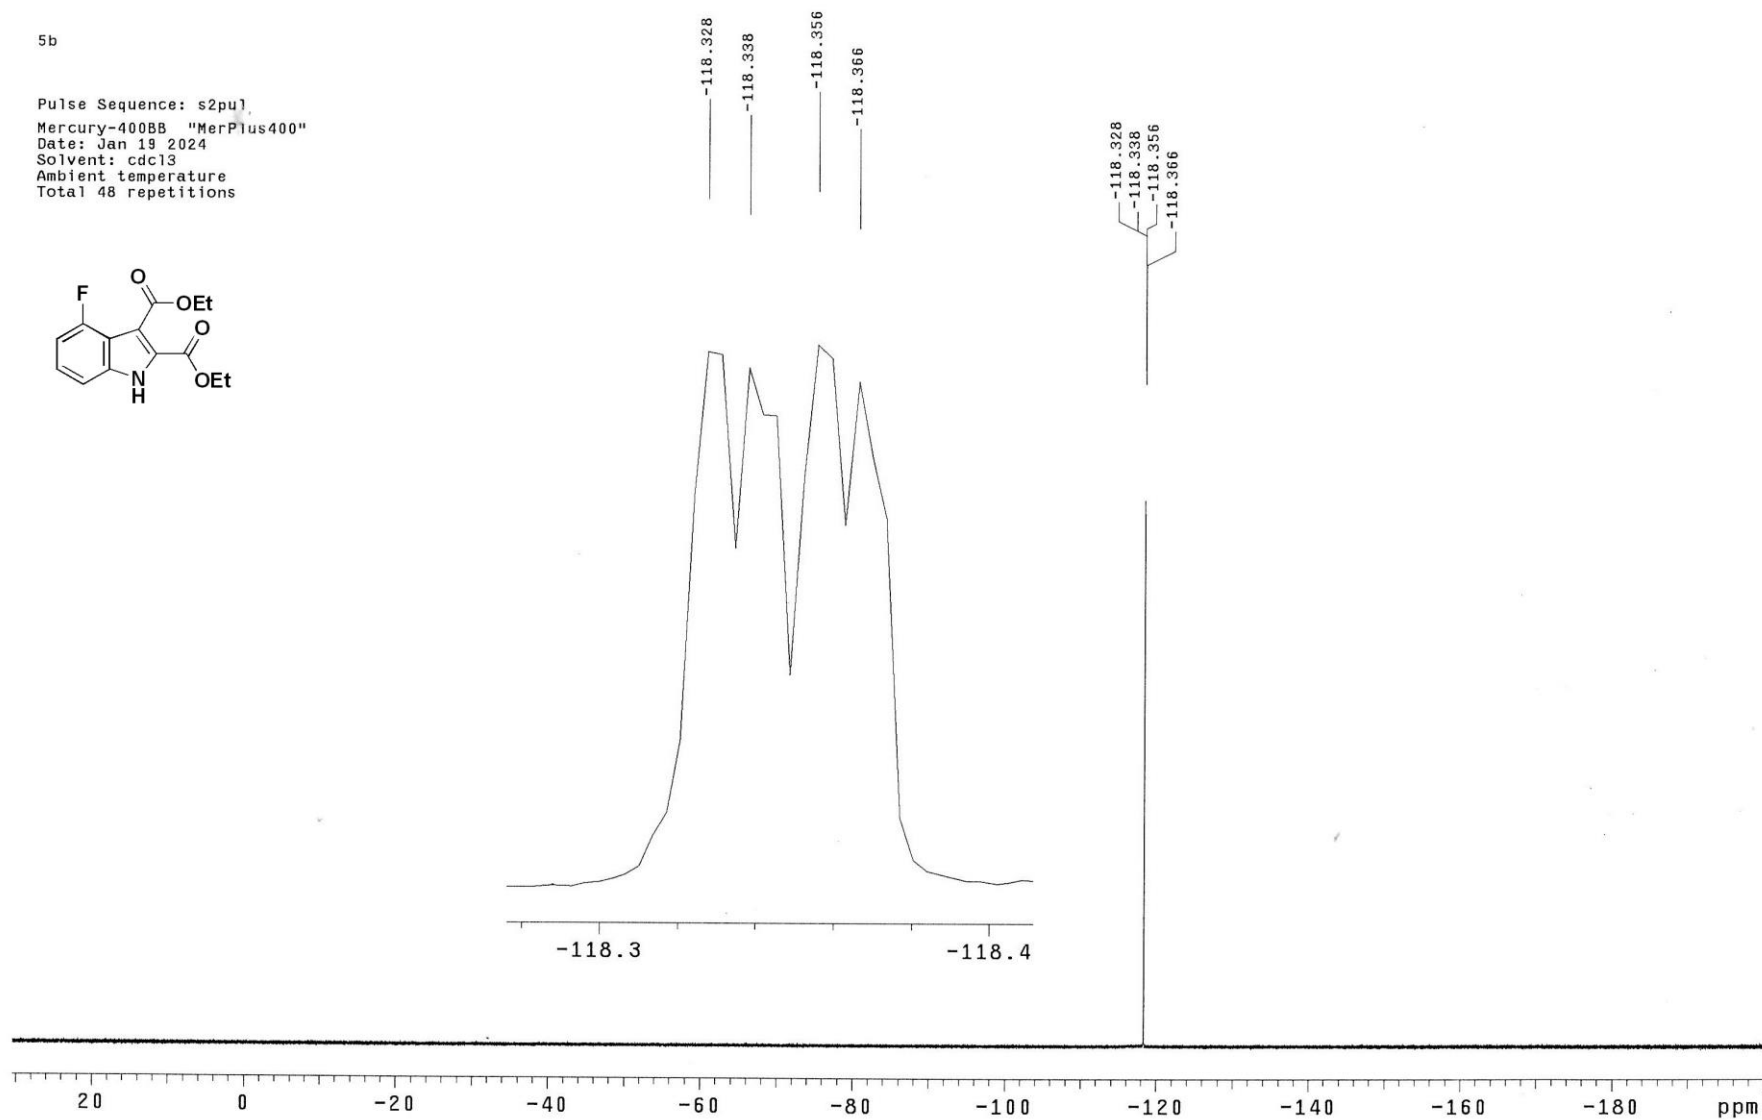

# Compound 5c (<sup>1</sup>H-NMR spectral data)

CHQ4148

Pulse Sequence: s2pu1

UNITYplus-400 "unity400"

Date: Mar 9 2023

Solvent: CDCl<sub>3</sub>

Ambient temperature

Total 32 repetitions

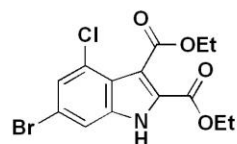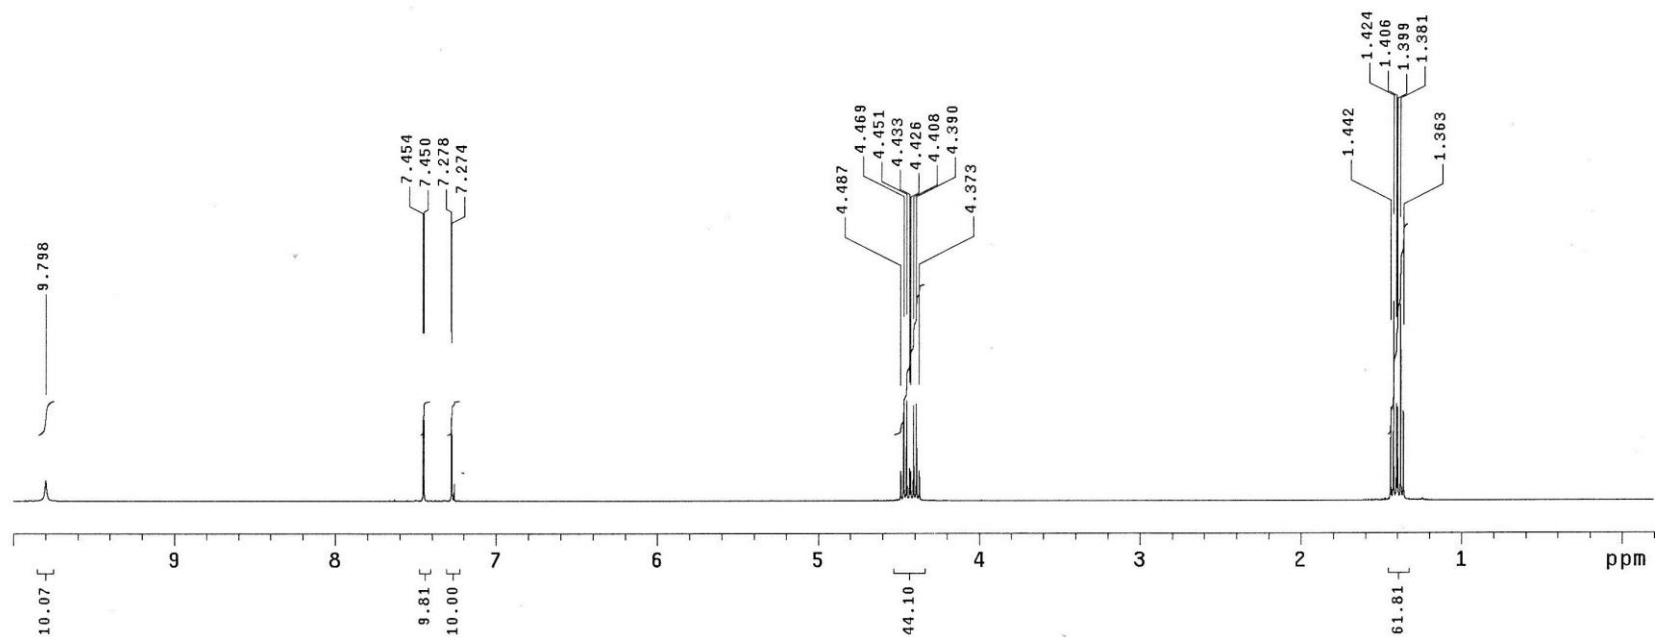



# Compound 5c (<sup>13</sup>C-NMR spectral data)

CHQ4148

Pulse Sequence: s2pu1  
UNITYplus-400 "unity400"  
Date: Mar 9 2023  
Solvent: CDCl<sub>3</sub>  
Ambient temperature  
Total 2032 repetitions

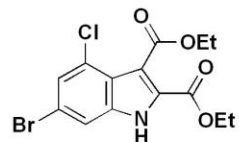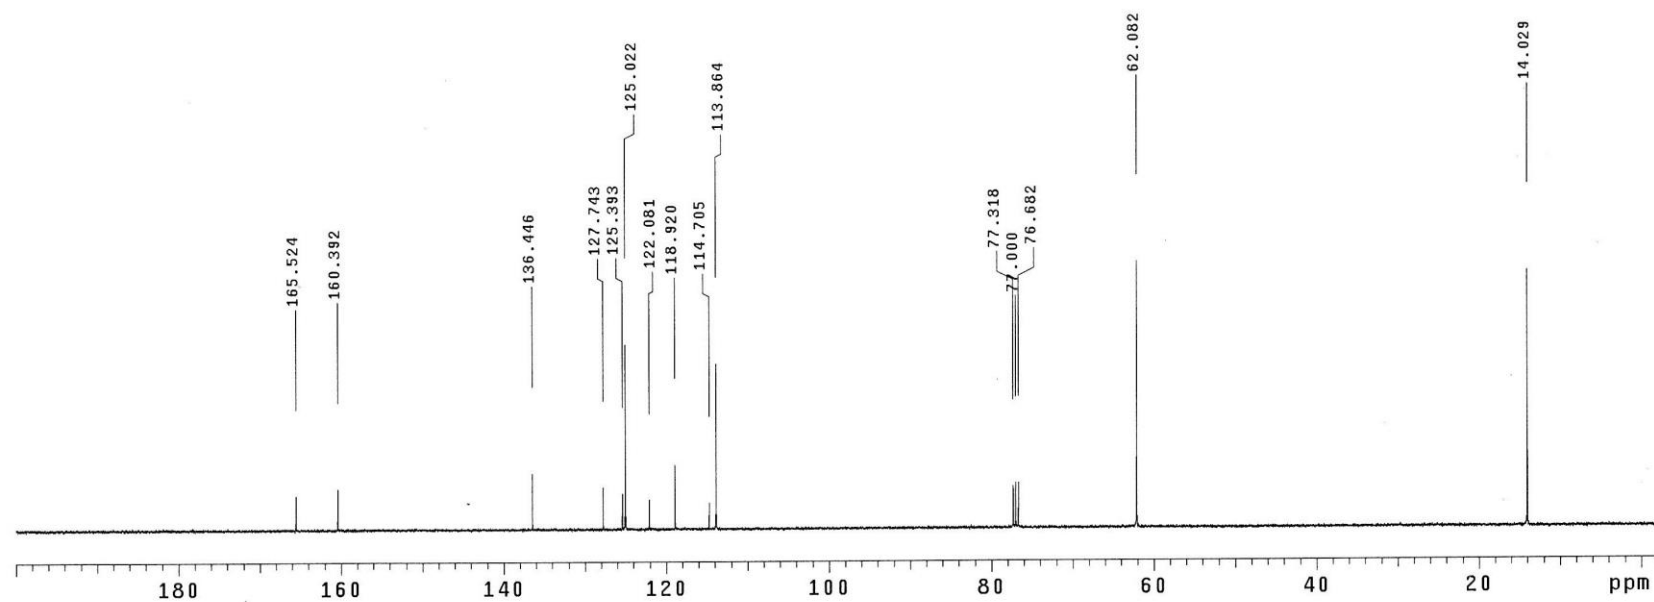

# Compound 5d (<sup>1</sup>H-NMR spectral data)

CHNF0908

Pulse Sequence: s2pu1  
 UNITYplus-400 "unity400"  
 Date: Sep 11 2023  
 Solvent: CDCl<sub>3</sub>  
 Ambient temperature  
 Total 32 repetition

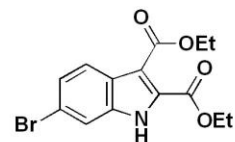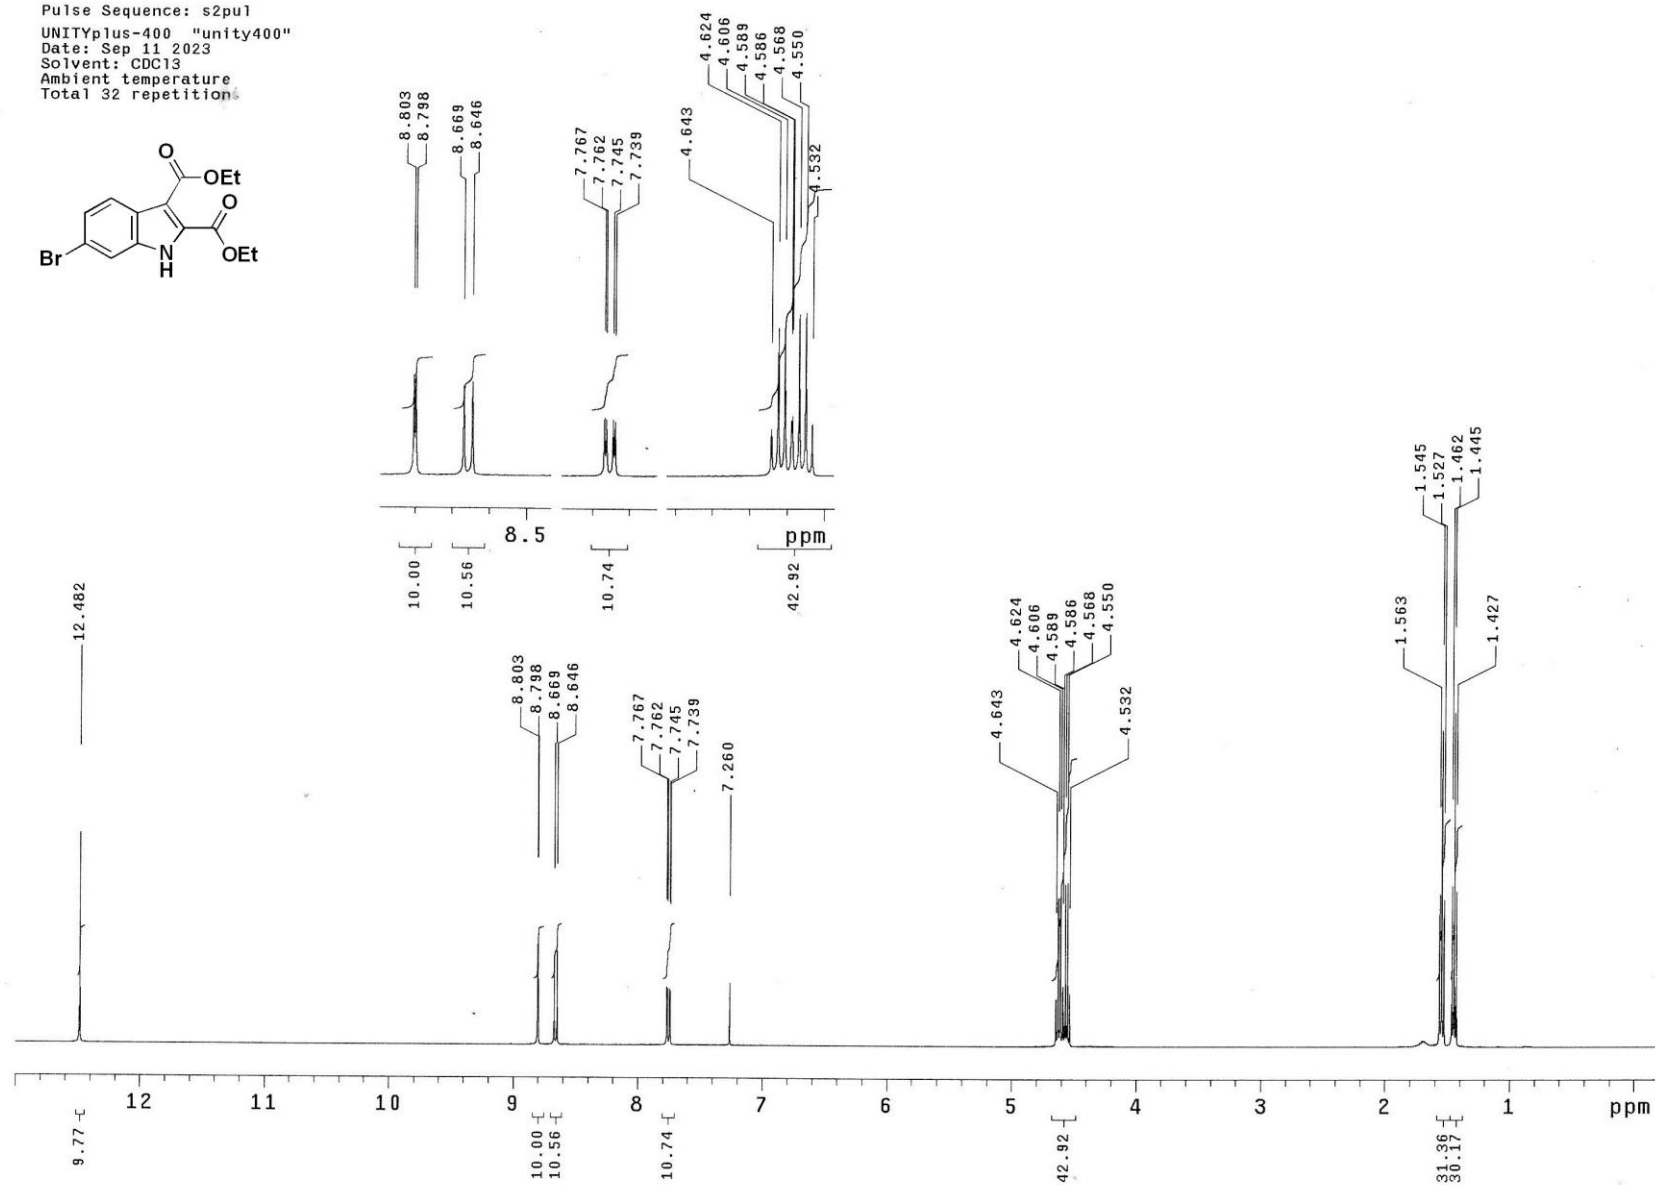

# Compound 5d (<sup>13</sup>C-NMR spectral data)

CHNF0908

Pulse Sequence: s2pu1

UNITYplus-400 "unity400"

Date: Sep 11 2023

Solvent: CDCl<sub>3</sub>

Ambient temperature

Total 4688 repetitions

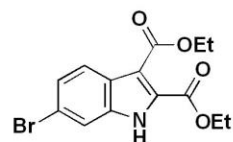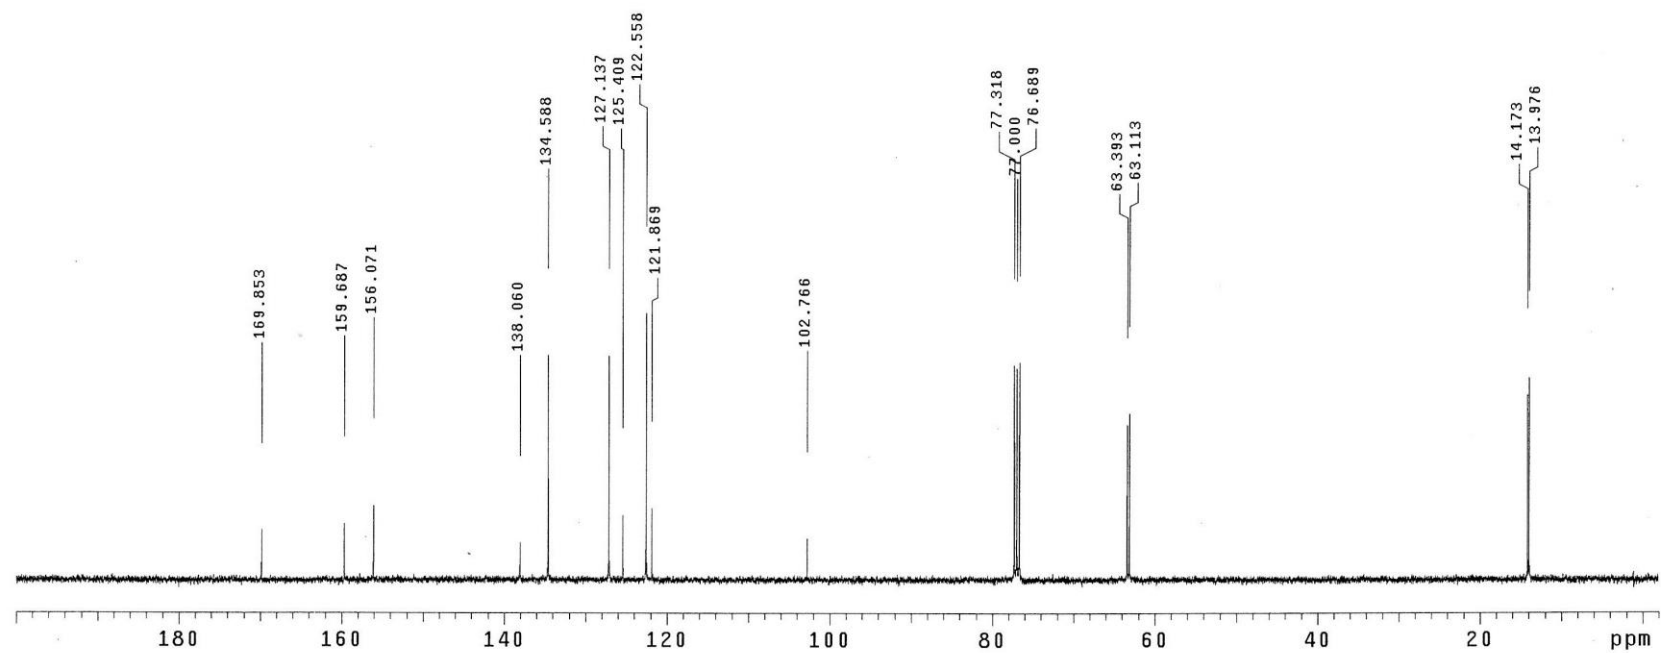

# Compound 5e (<sup>1</sup>H-NMR spectral data)

CHNF1016

Pulse Sequence: s2pu1  
 UNITYplus-400 "unity400"  
 Date: Oct 17 2023  
 Solvent: CDCl<sub>3</sub>  
 Ambient temperature  
 Total 32 repetitions

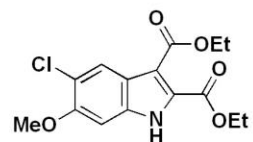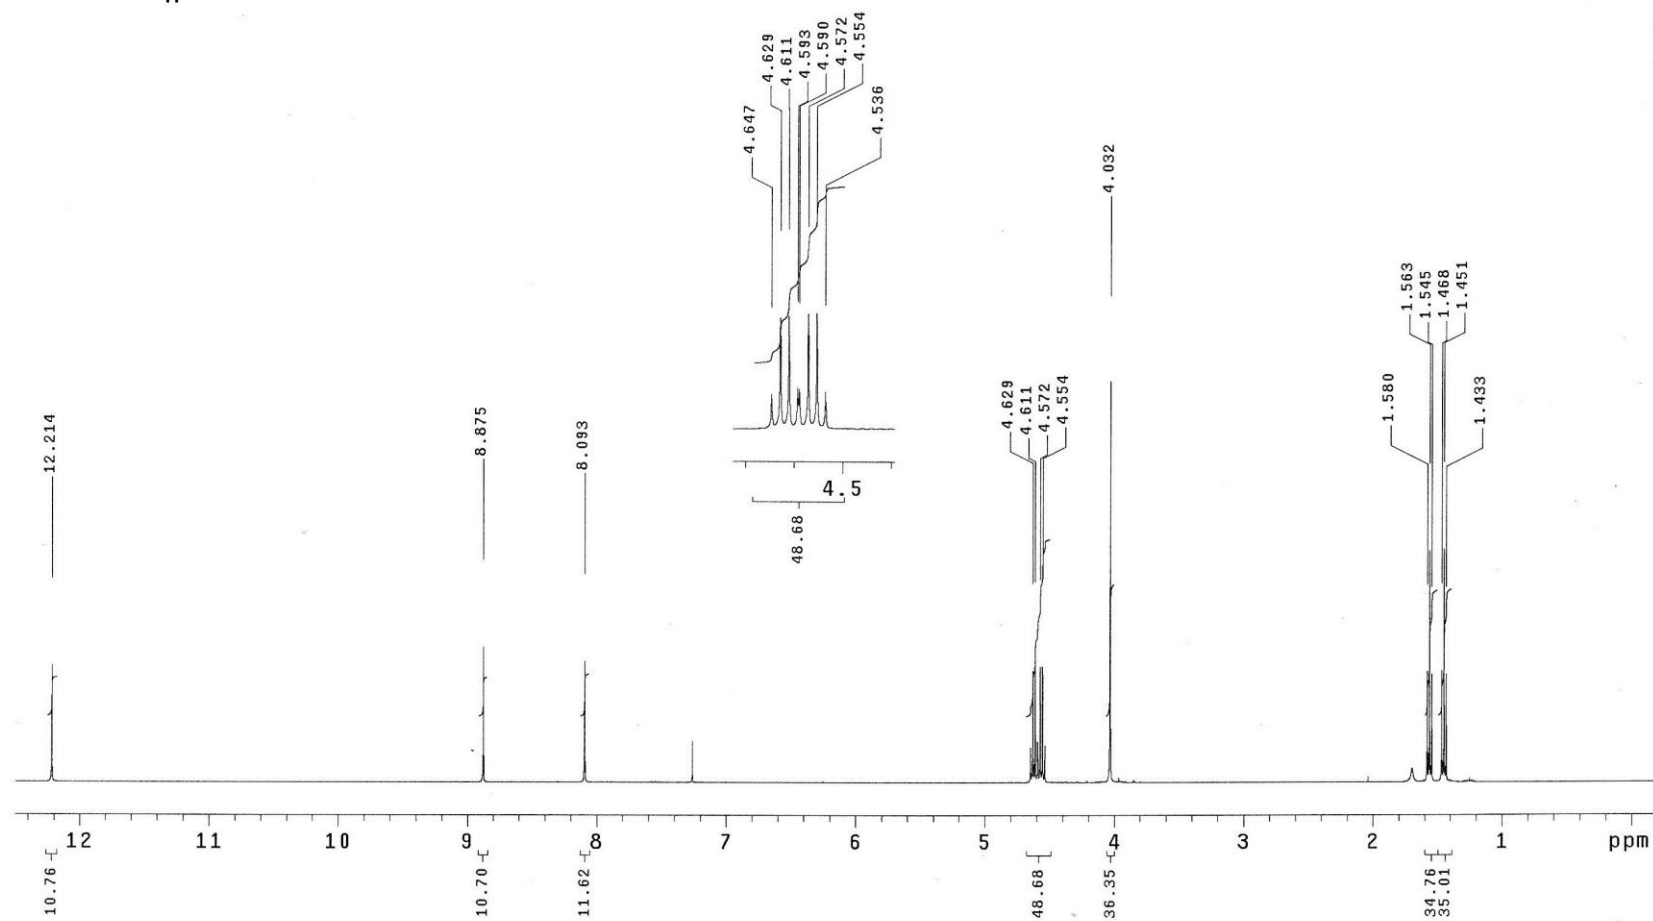

# Compound 5e (<sup>13</sup>C-NMR spectral data)

CHNF1016

Pulse Sequence: s2pu1  
 UNITYplus-400 "unity400"  
 Date: Oct 17 2023  
 Solvent: CDCl<sub>3</sub>  
 Ambient temperature  
 Total 3072 repetitions

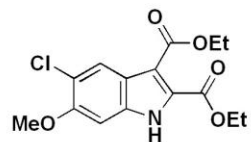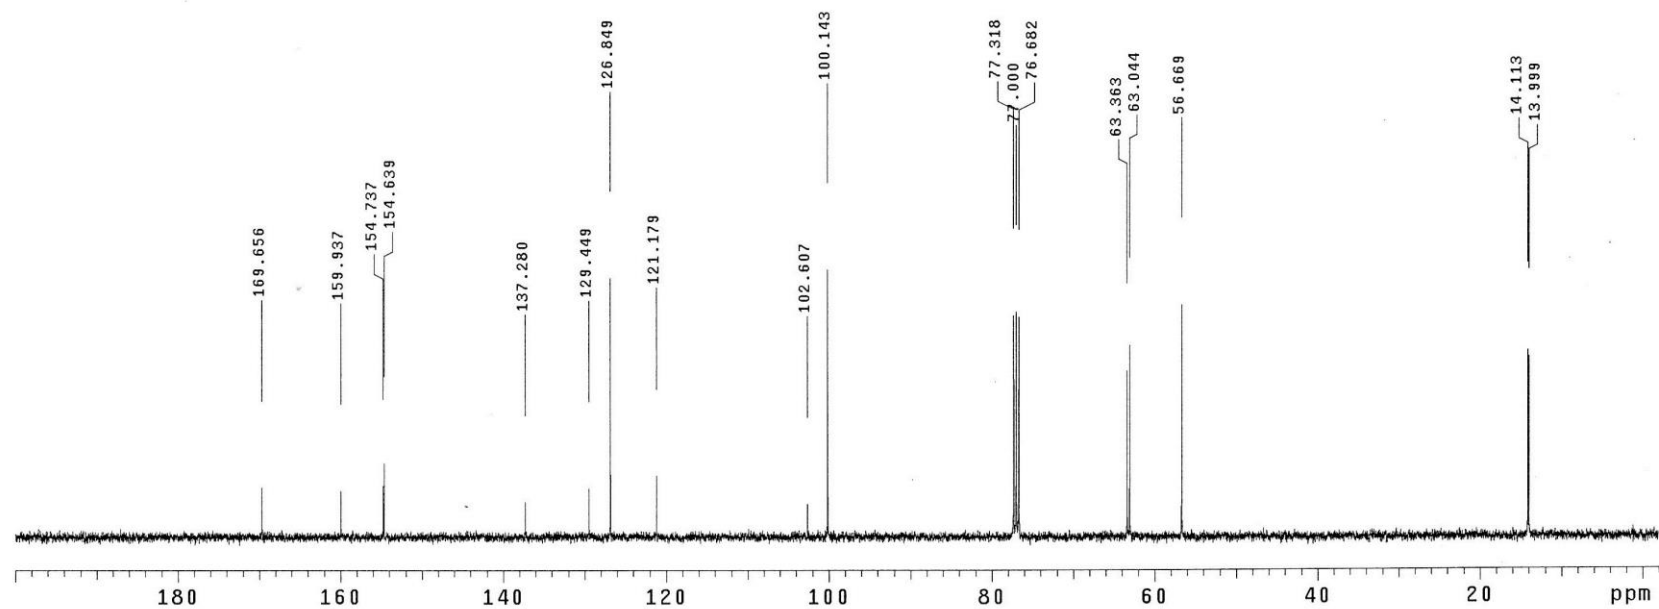

# Compound 6a (<sup>1</sup>H-NMR spectral data)

CHNF1828

Pulse Sequence: s2pu1  
 UNITYplus-400 "unity400"  
 Date: Sep 7 2023  
 Solvent: CDCl<sub>3</sub>  
 Ambient temperature  
 Total 64 repetitions

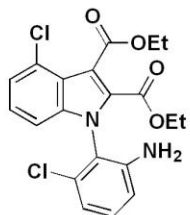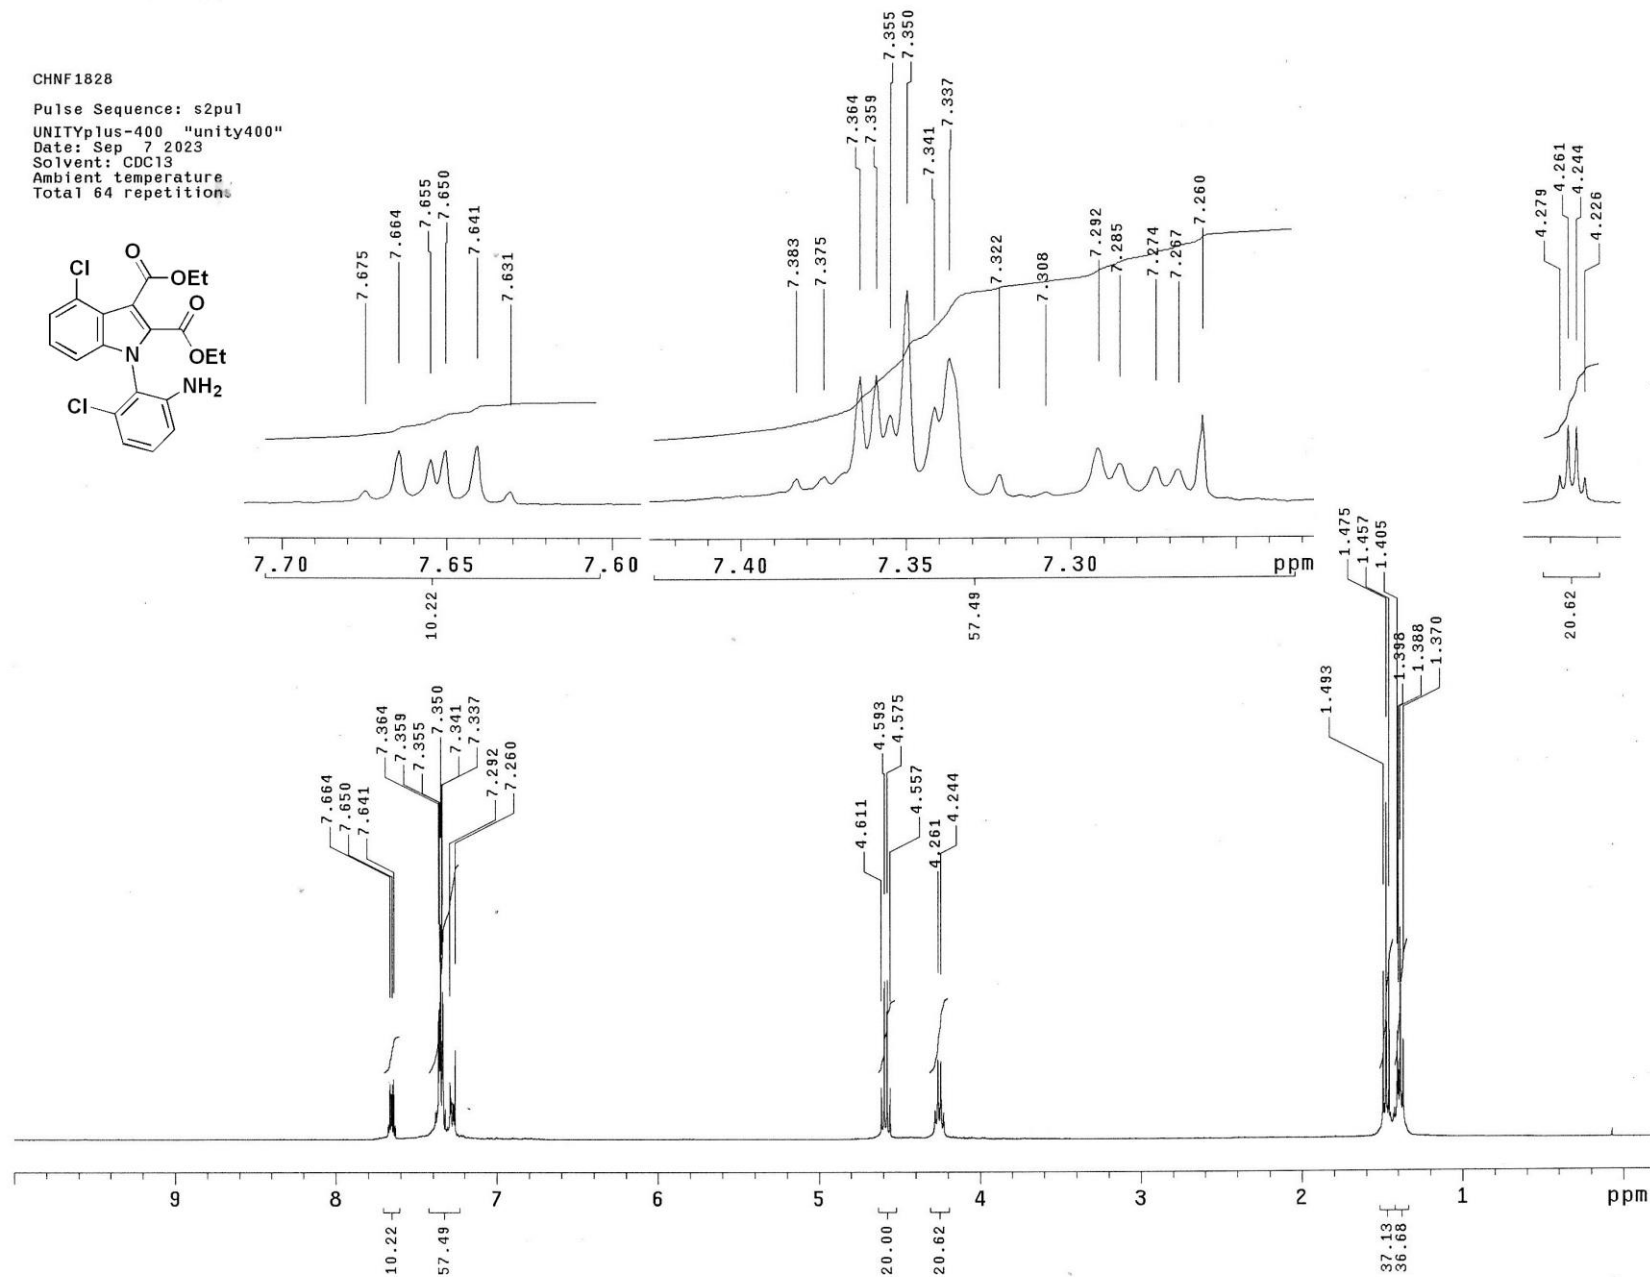

# Compound 6a (<sup>13</sup>C-NMR spectral data)

CHNF1828

Pulse Sequence: s2pu1  
 UNITYplus-400 "unity400"  
 Date: Sep 7 2023  
 Solvent: CDCl<sub>3</sub>  
 Ambient temperature  
 Total 2160 repetitions

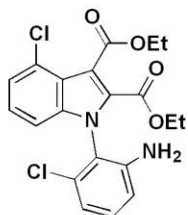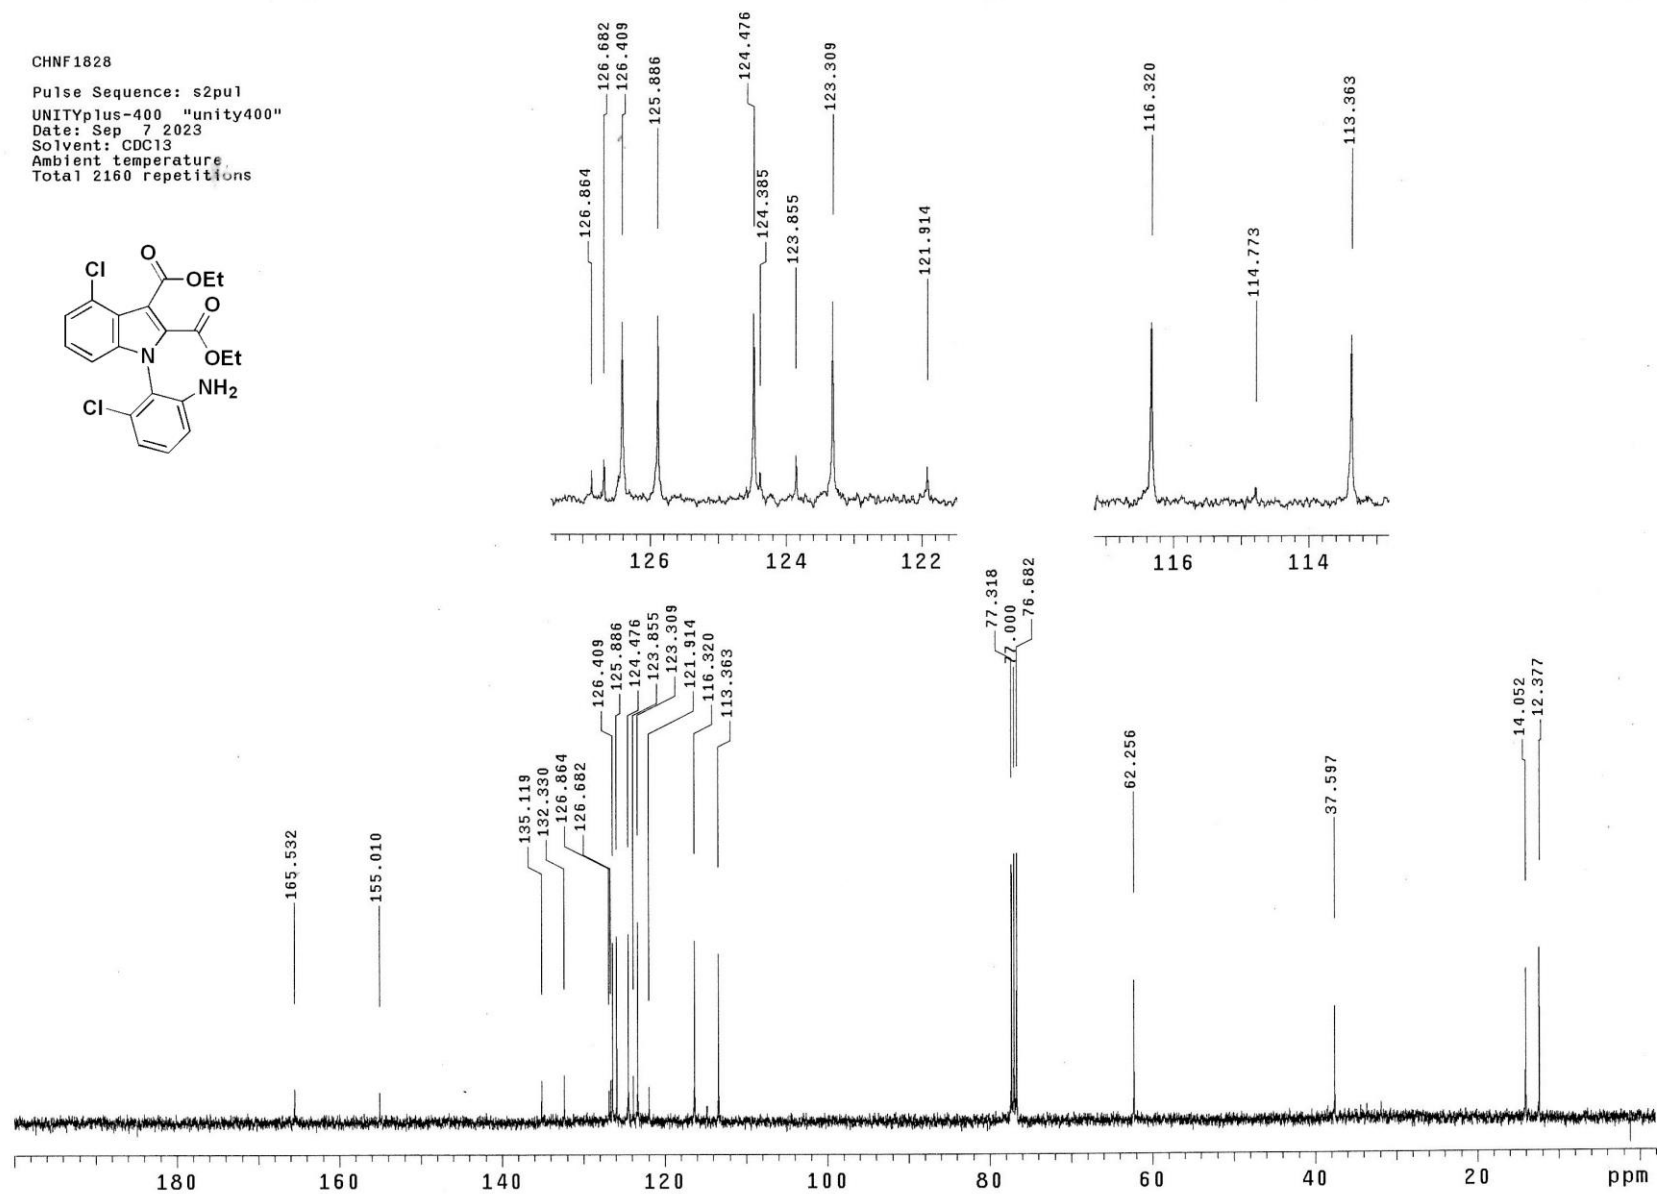

# Compound 6b (<sup>1</sup>H-NMR spectral data)

CHNF3047

Pulse Sequence: s2pu1  
 UNITYplus-400 "unity400"  
 Date: Sep 18 2023  
 Solvent: THF  
 Ambient temperature  
 Total 32 repetitions

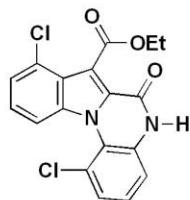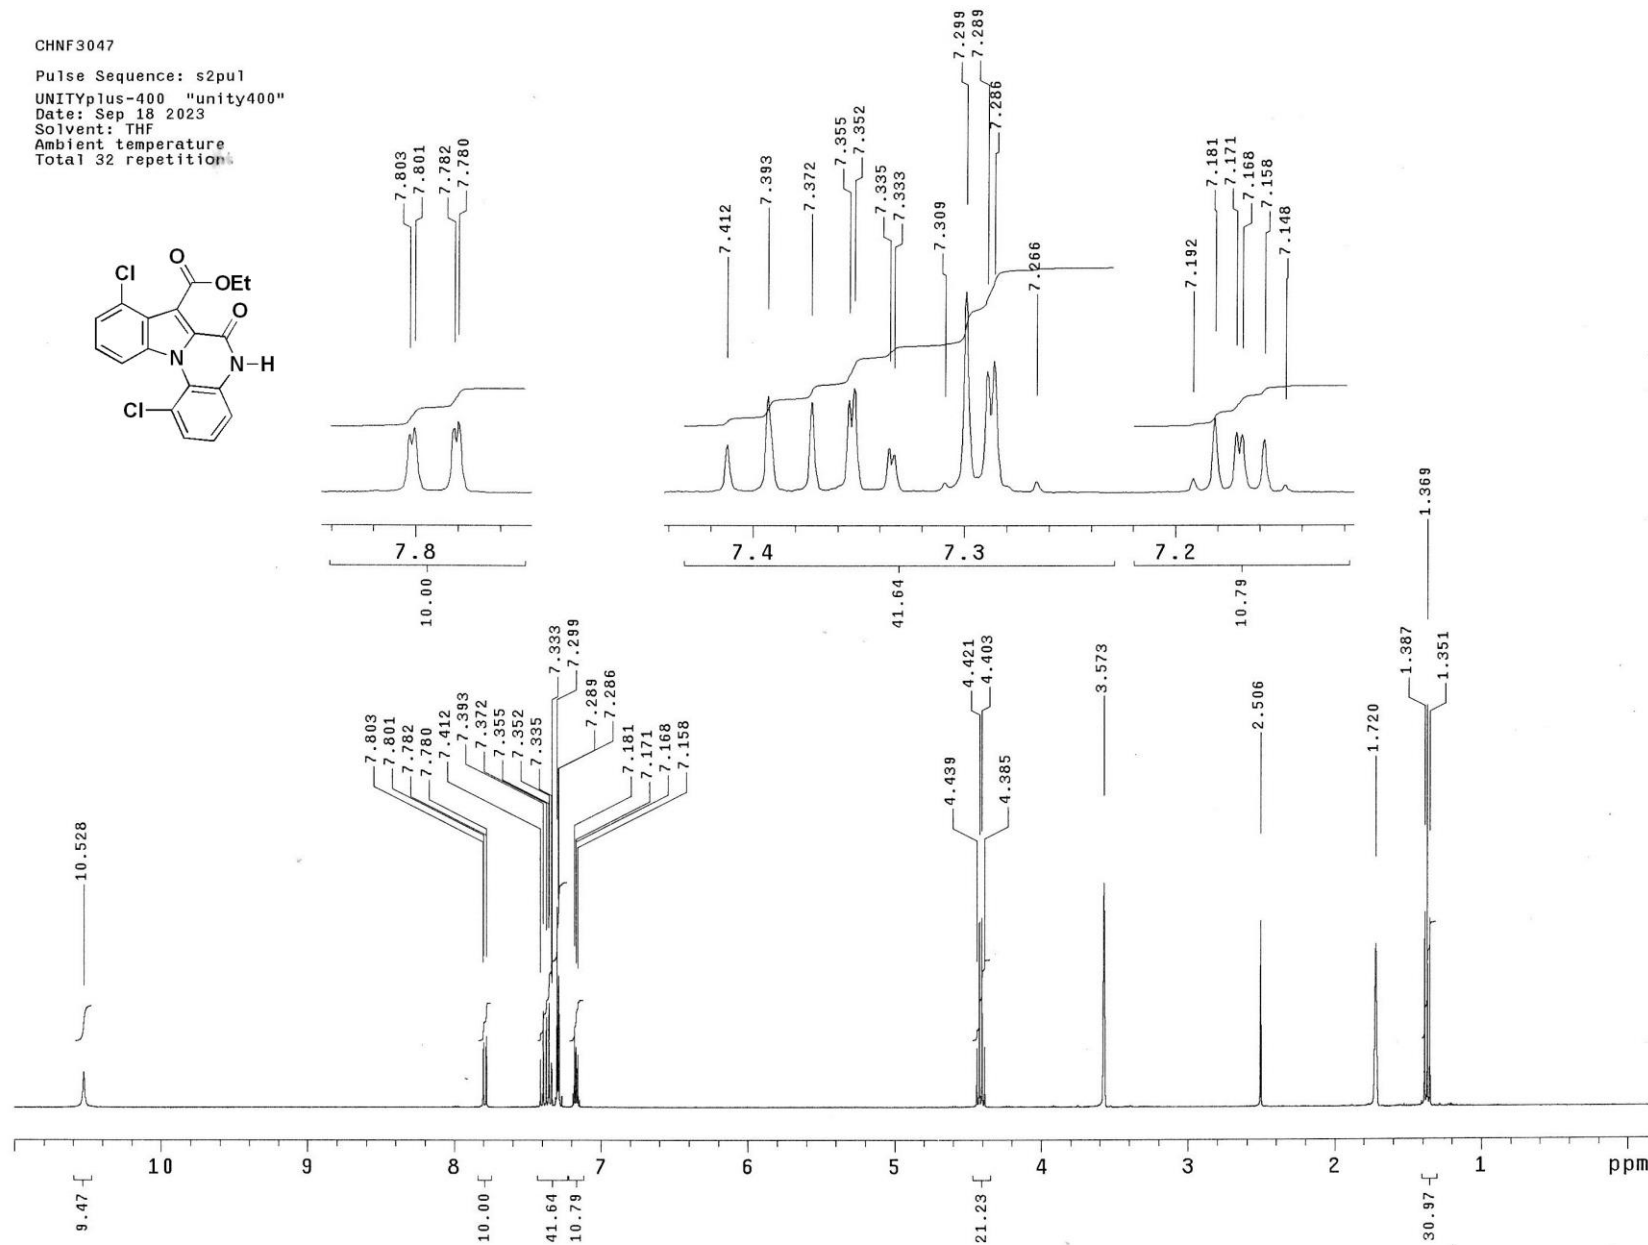



# Compound 6b (<sup>13</sup>C-NMR spectral data)

CHNF3047

Pulse Sequence: s2pu1

UNITYplus-400 "unity400"

Date: Sep 18 2023

Solvent: THF

Ambient temperature

Total 10064 repetitions

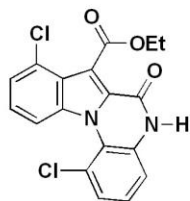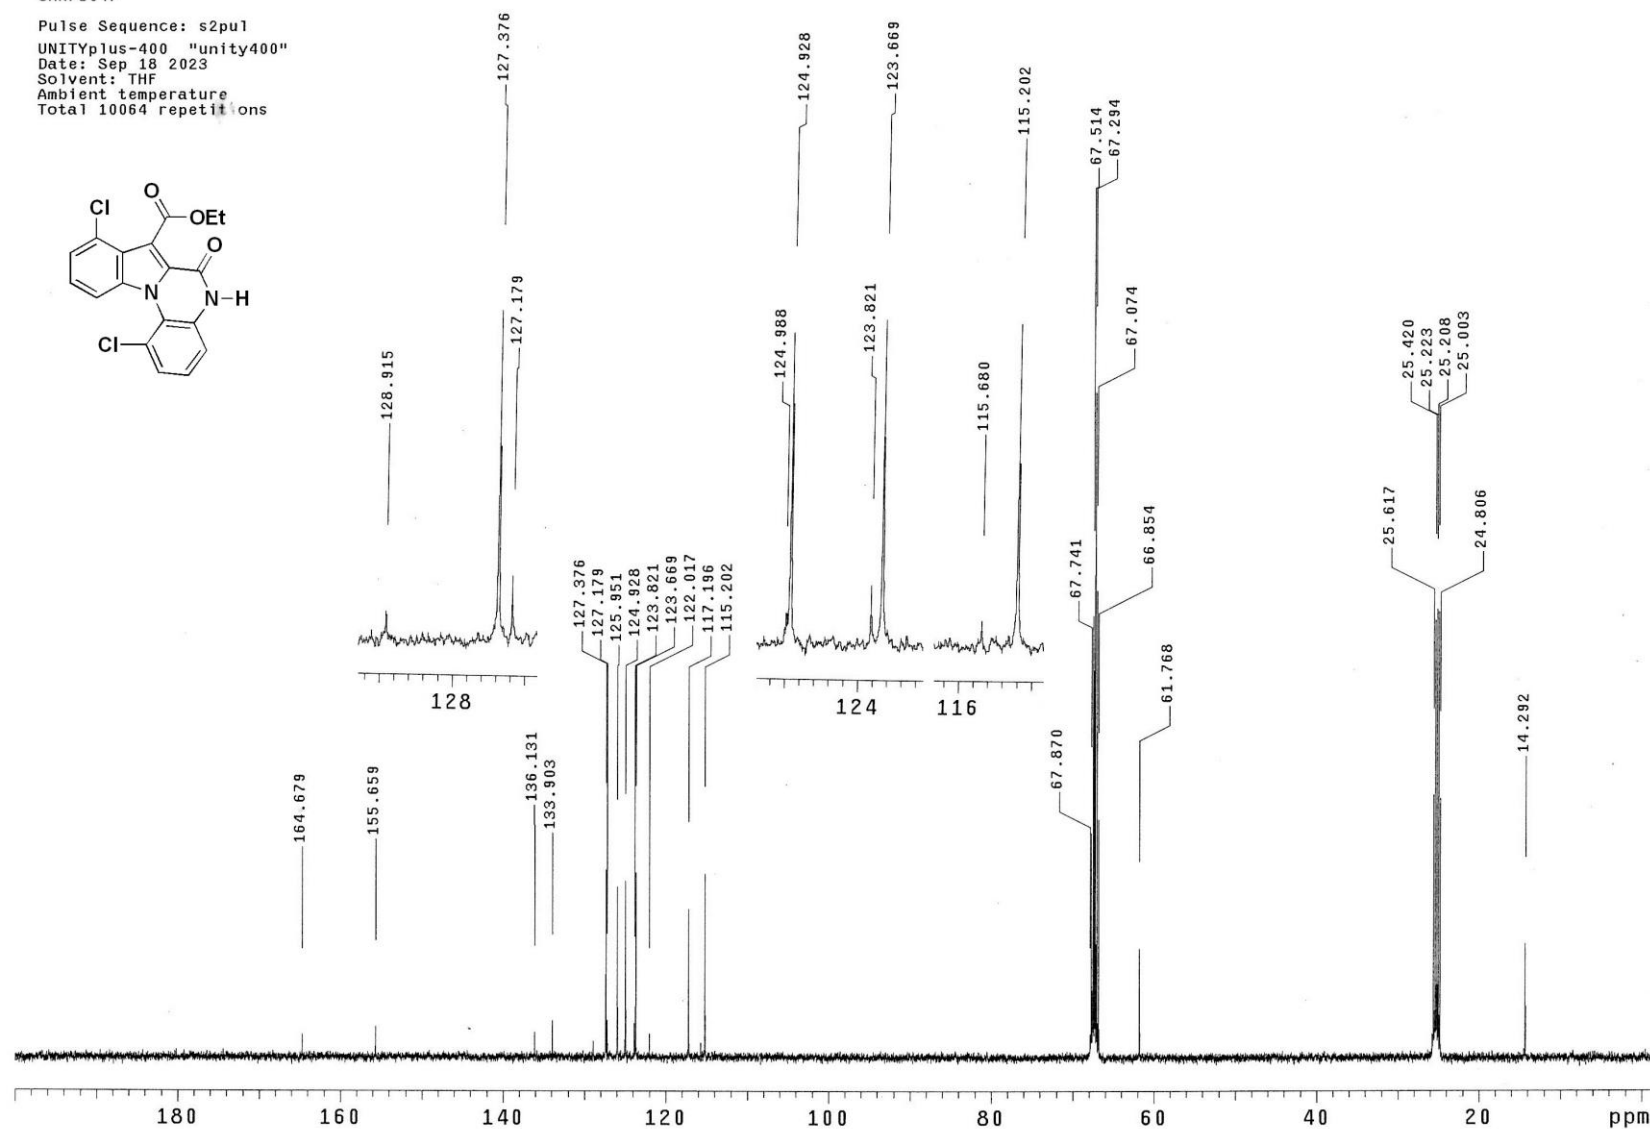

# Compound 7a (<sup>1</sup>H-NMR spectral data)

CH3238

Pulse Sequence: s2pu1  
 UNITYplus-400 "unity400"  
 Date: Jul 17 2023  
 Solvent: CDCl<sub>3</sub>  
 Ambient temperature  
 Total 32 repetitions

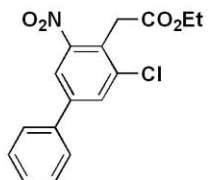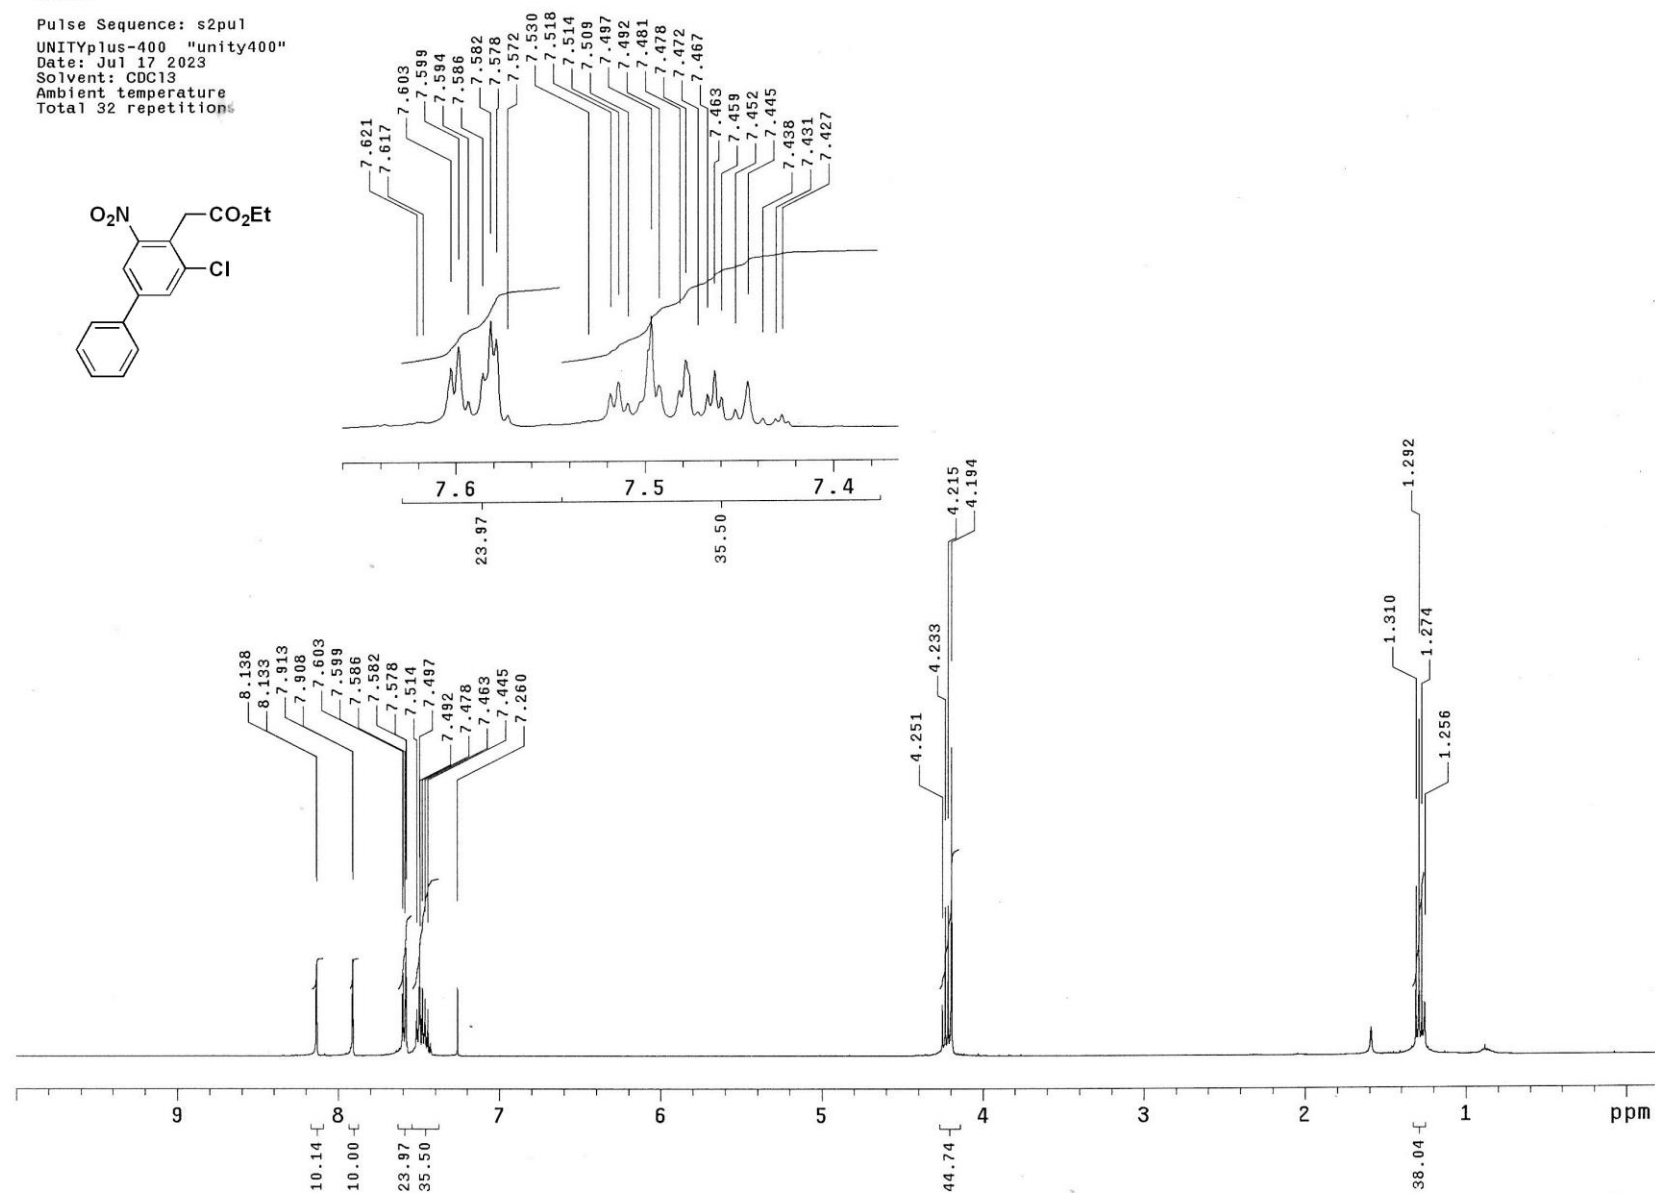

# Compound 7a (<sup>13</sup>C-NMR spectral data)

CH3238

Pulse Sequence: s2pu1

UNITYplus-400 "unity400"

Date: Jul 17 2023

Solvent: CDCl<sub>3</sub>

Ambient temperature

Total 2368 repetitions

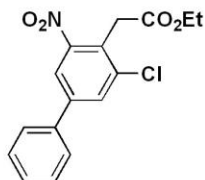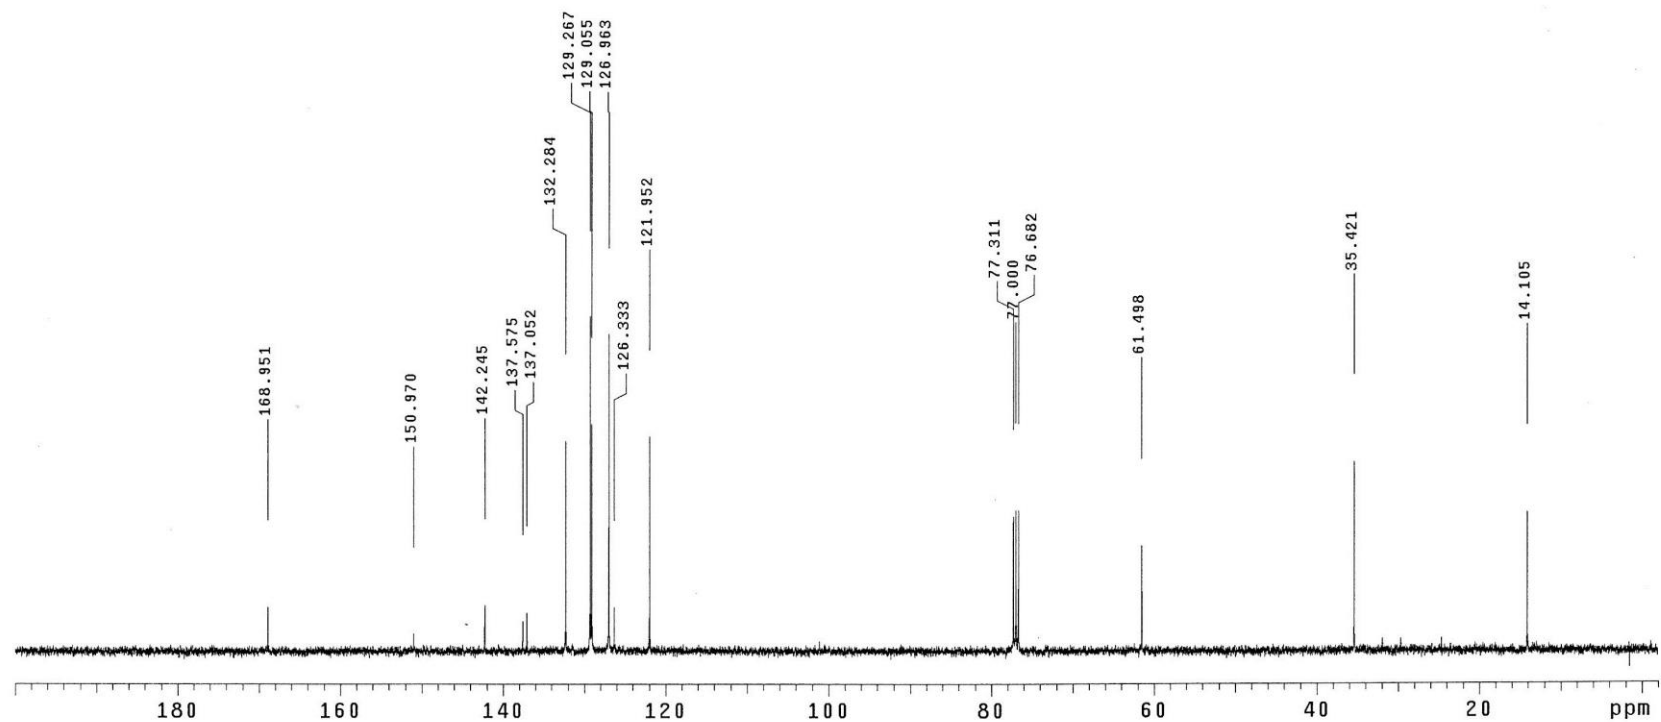

# Compound 7b (<sup>1</sup>H-NMR spectral data)

CH2734

Pulse Sequence: s2pu1

UNITYplus-400 "unity400"

Date: Jul 19 2023

Solvent: CDCl<sub>3</sub>

Ambient temperature

Total 32 repetitions

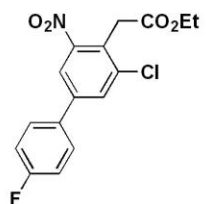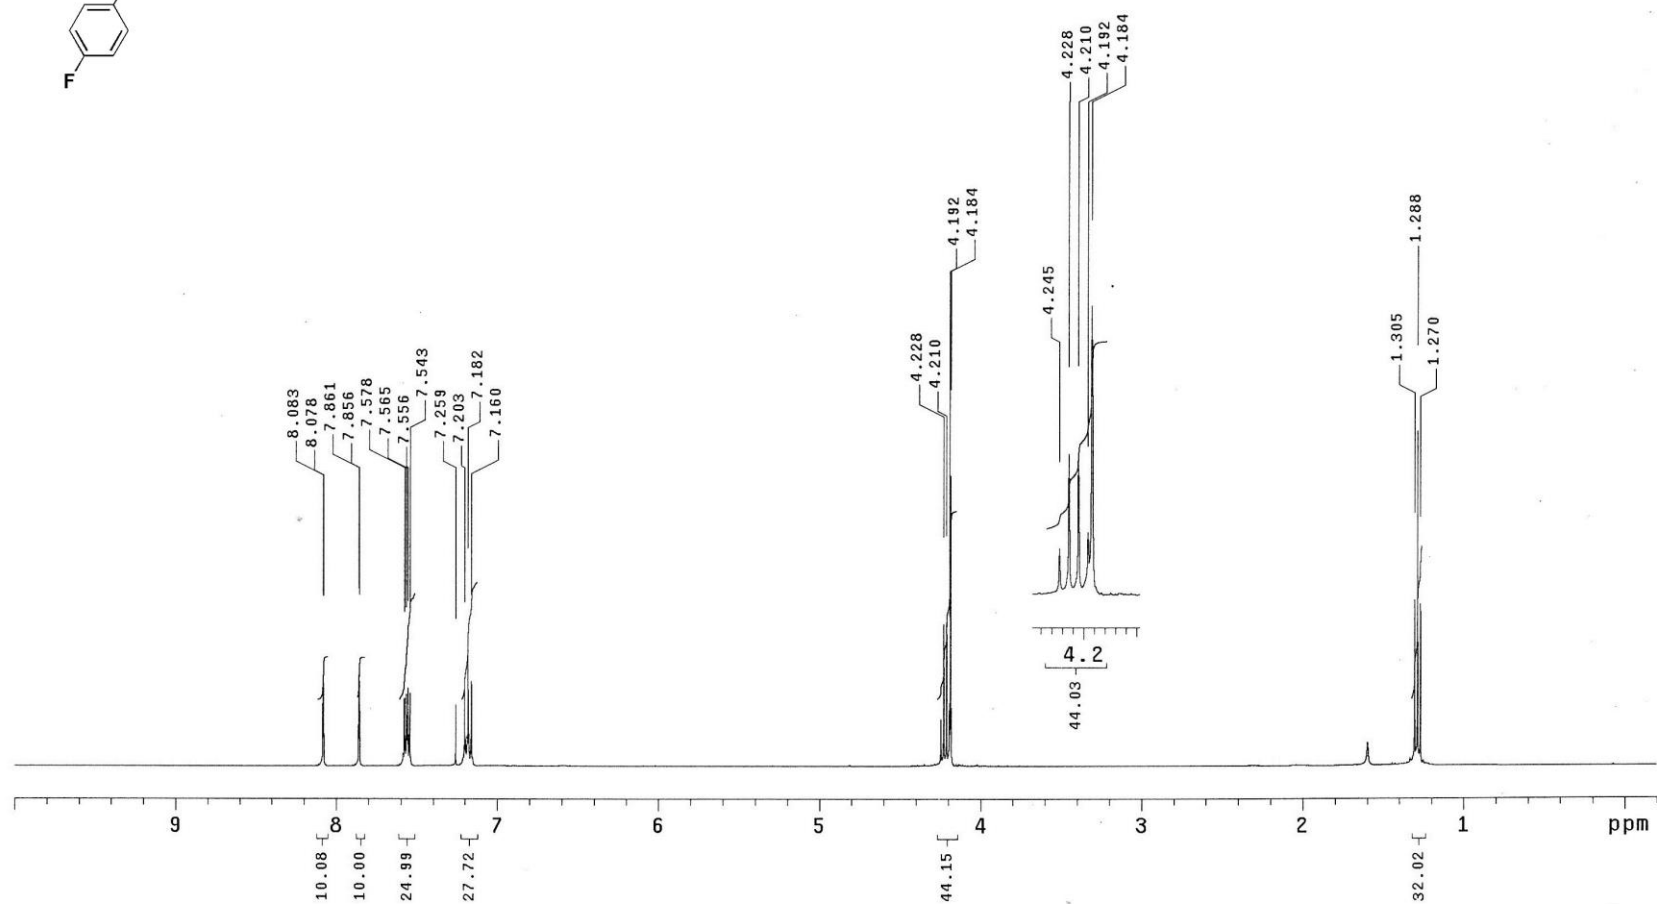

# Compound 7b (<sup>13</sup>C-NMR spectral data)

CH2734

Pulse Sequence: s2pu1

UNITYplus-400 "unity400"

Date: Jul 19 2023

Solvent: CDCl<sub>3</sub>

Ambient temperature

Total 2240 repetitions

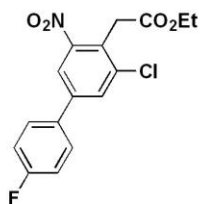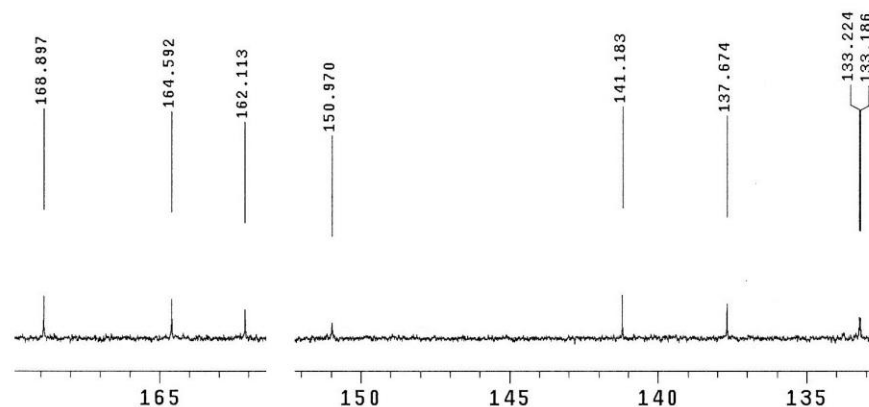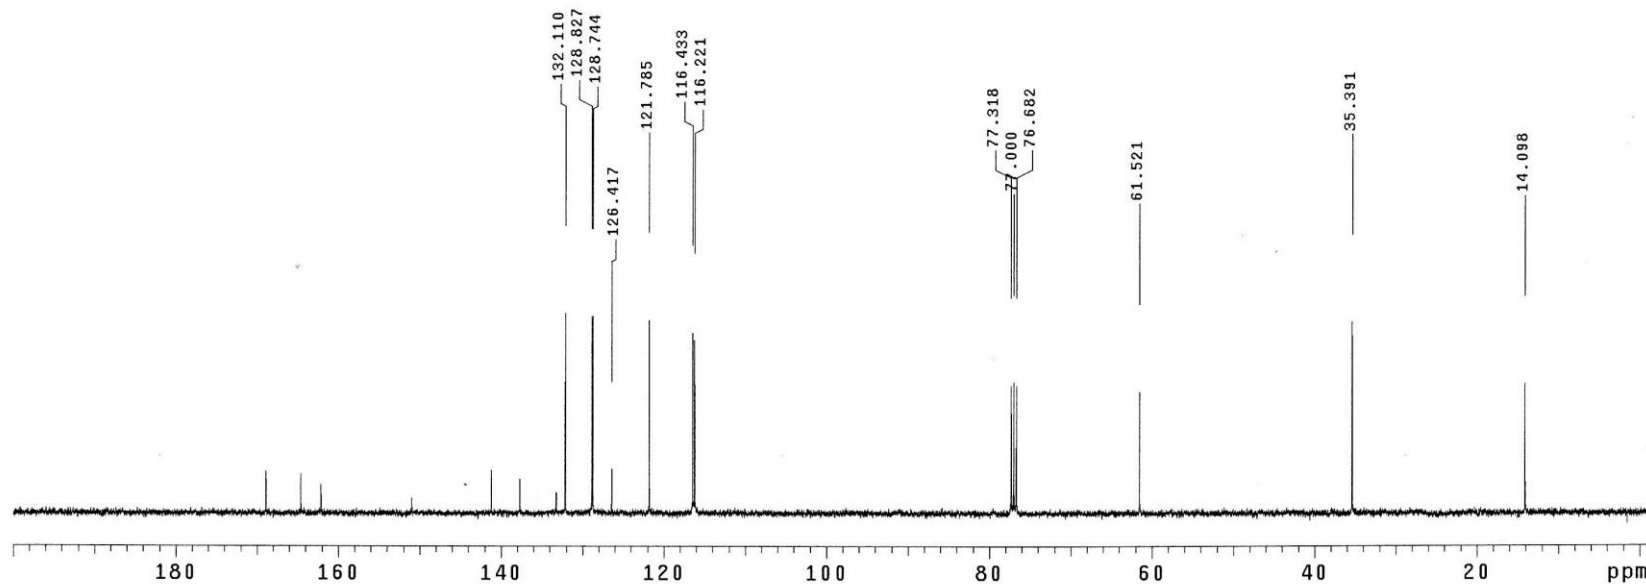

# Compound 7b ( $^{19}\text{F}$ -NMR spectral data)

Pulse Sequence: s2pu1  
Mercury-400BB "MerPlus400"  
Date: Jan 19 2024  
Solvent: cdcl3  
Ambient temperature  
Total 104 repetitions

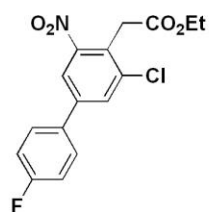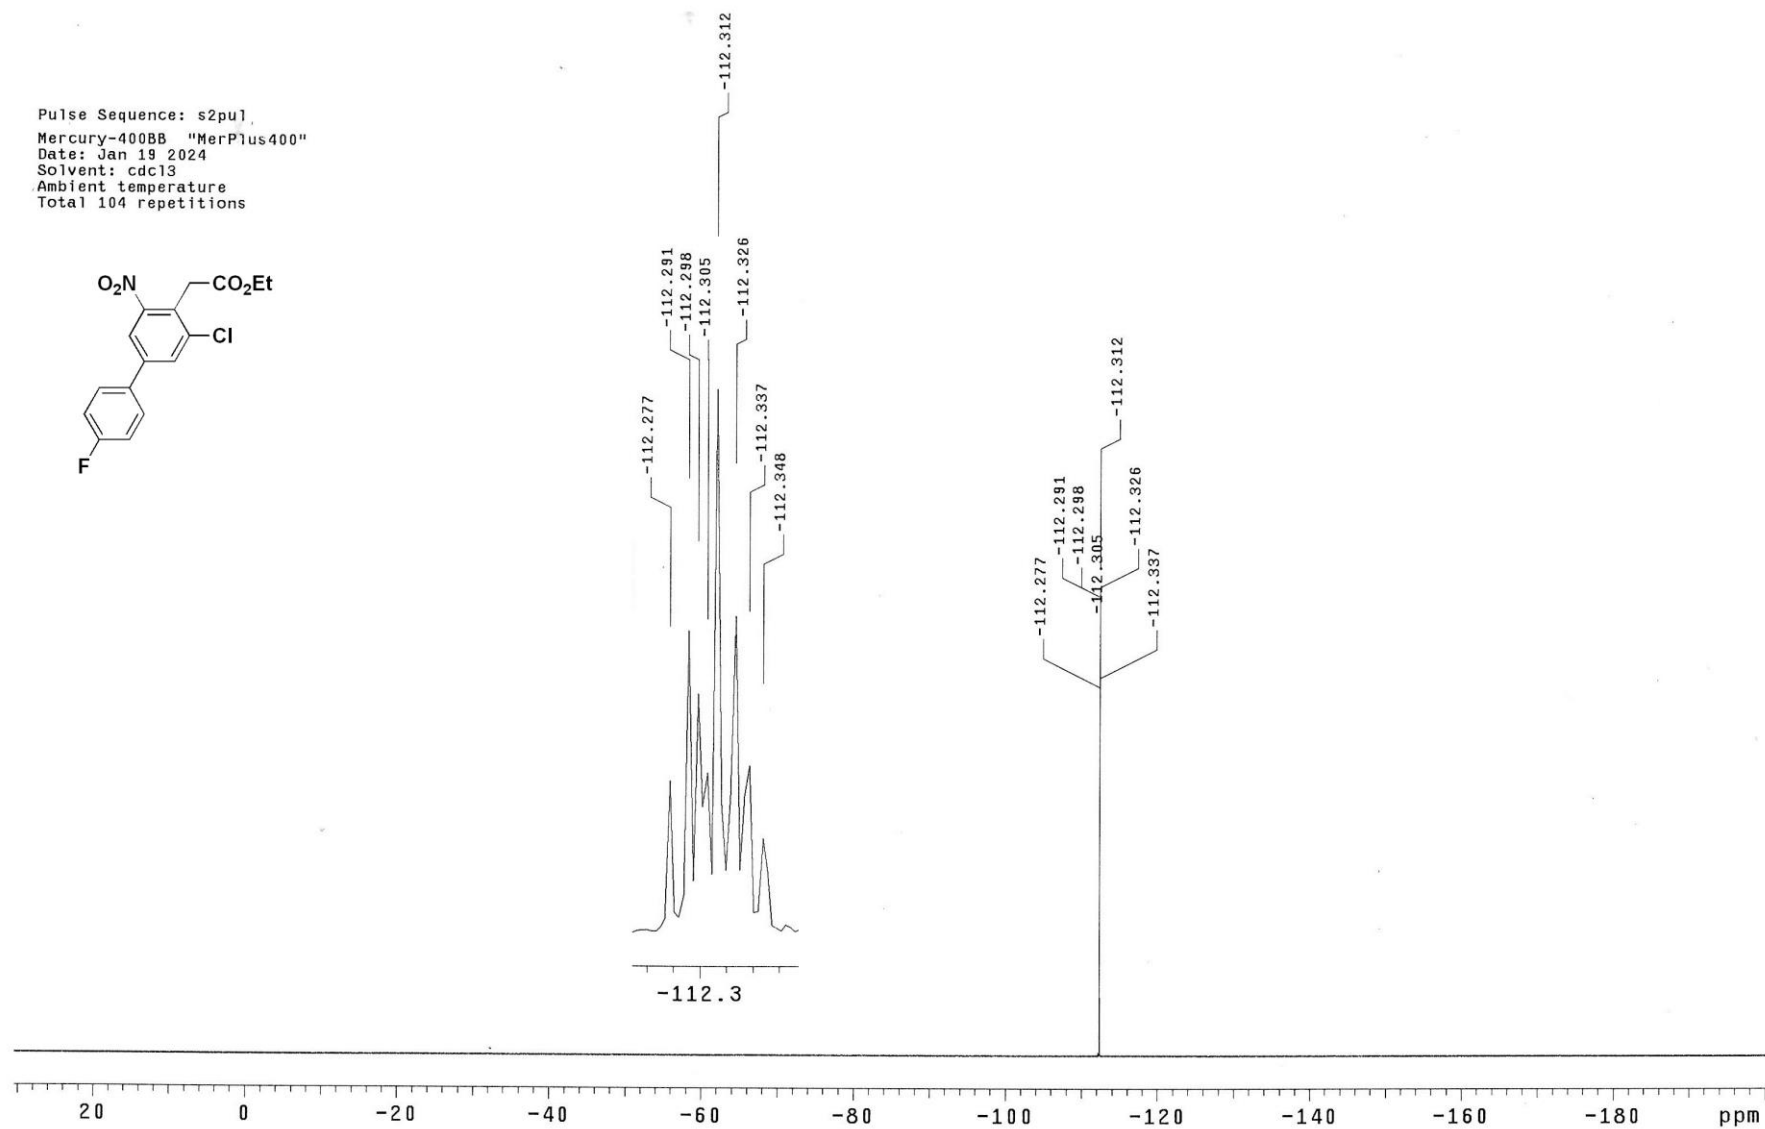

# Compound 7c (<sup>1</sup>H-NMR spectral data)

CH3240

Pulse Sequence: s2pu1  
 UNITYplus-400 "unity400"  
 Date: Jul 26 2023  
 Solvent: CDCl<sub>3</sub>  
 Ambient temperature  
 Total 32 repetitions

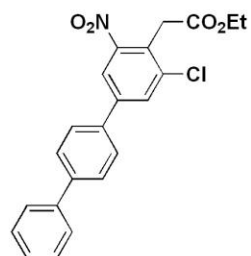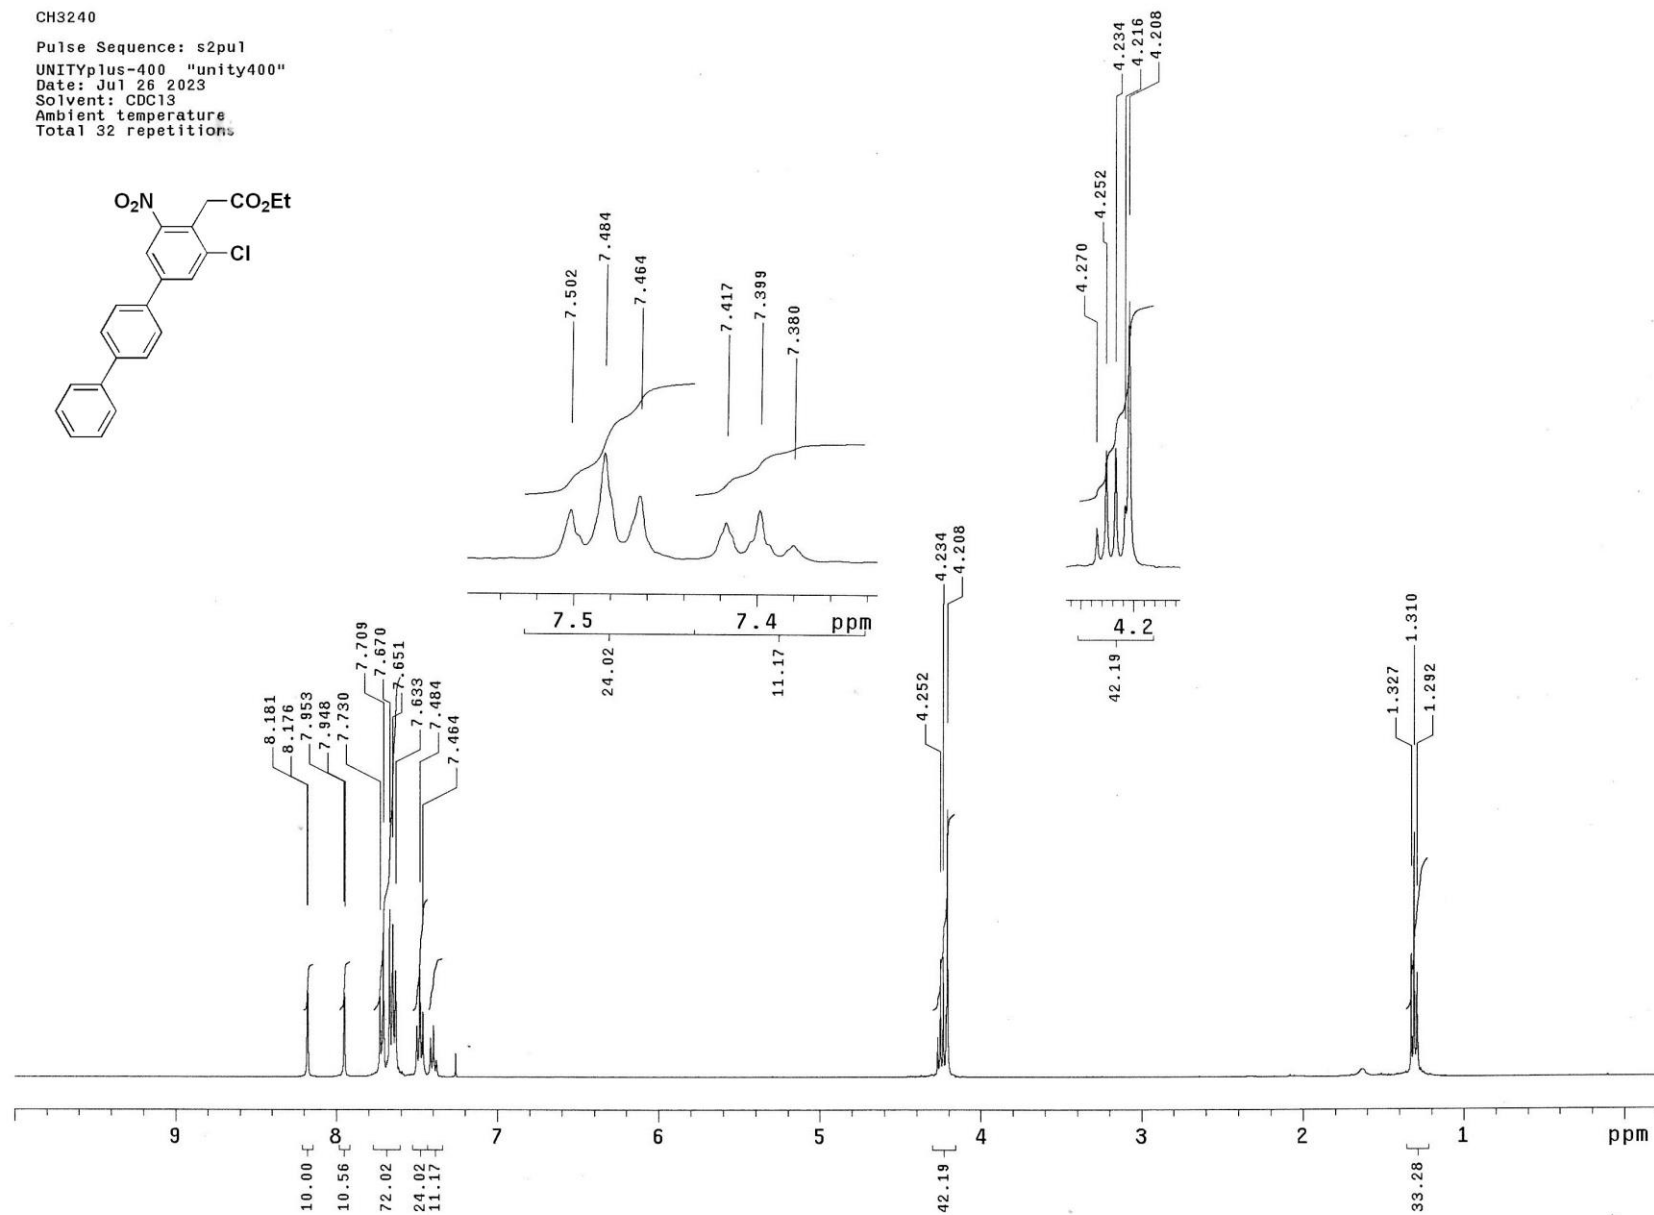

# Compound 7c (<sup>13</sup>C-NMR spectral data)

CH3240

Pulse Sequence: s2pu1

UNITYplus-400 "unity400"

Date: Jul 26 2023

Solvent: CDCl<sub>3</sub>

Ambient temperature

Total 1200 repetitions

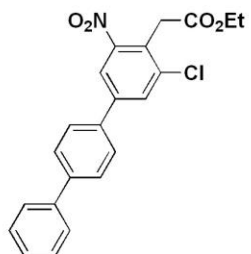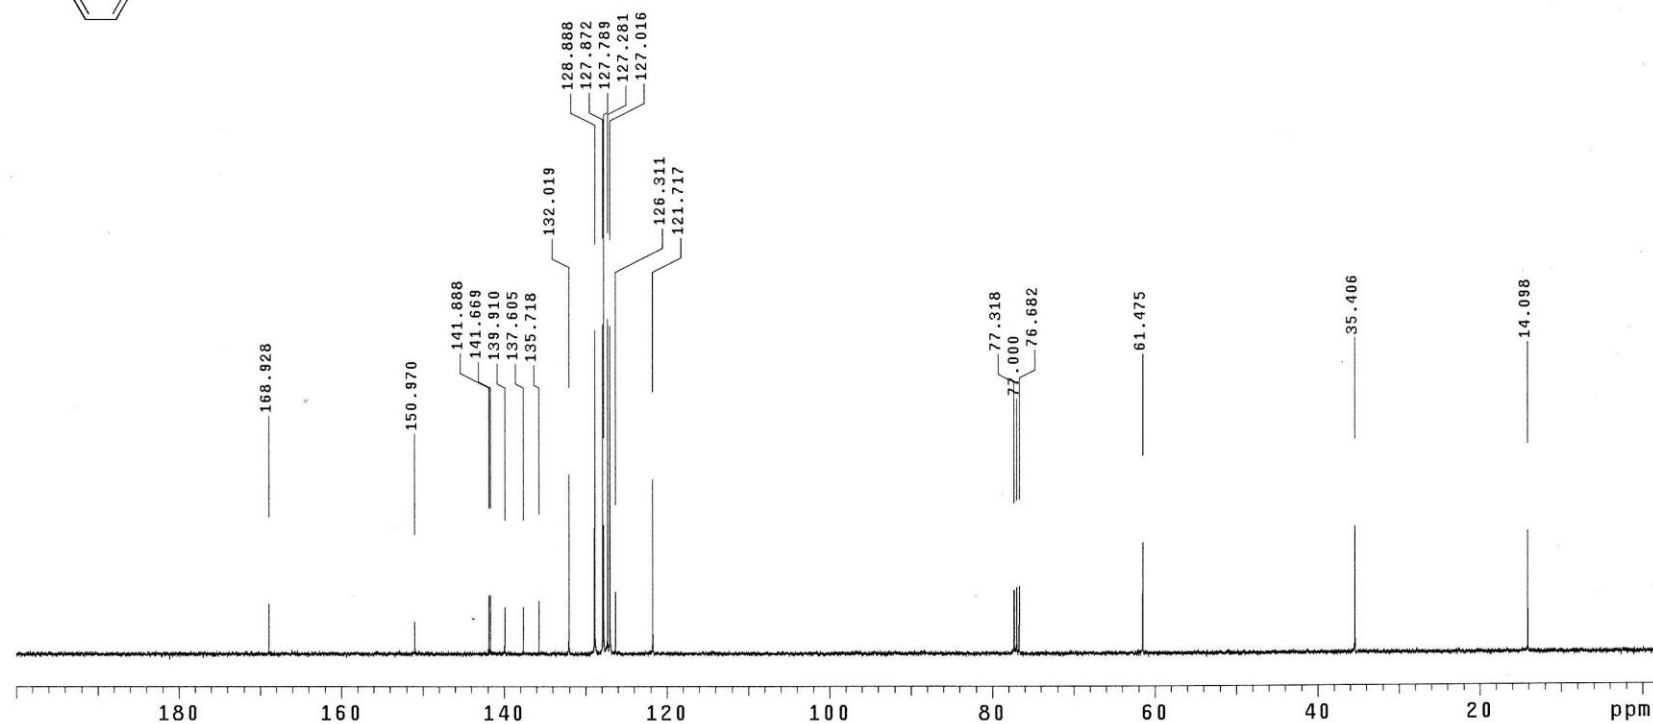



# Compound 7d (<sup>1</sup>H-NMR spectral data)

CH3742

Pulse Sequence: s2pu1  
 UNITYplus-400 "unity400"  
 Date: Aug 17 2023  
 Solvent: CDCl<sub>3</sub>  
 Ambient temperature  
 Total 32 repetitions

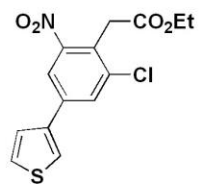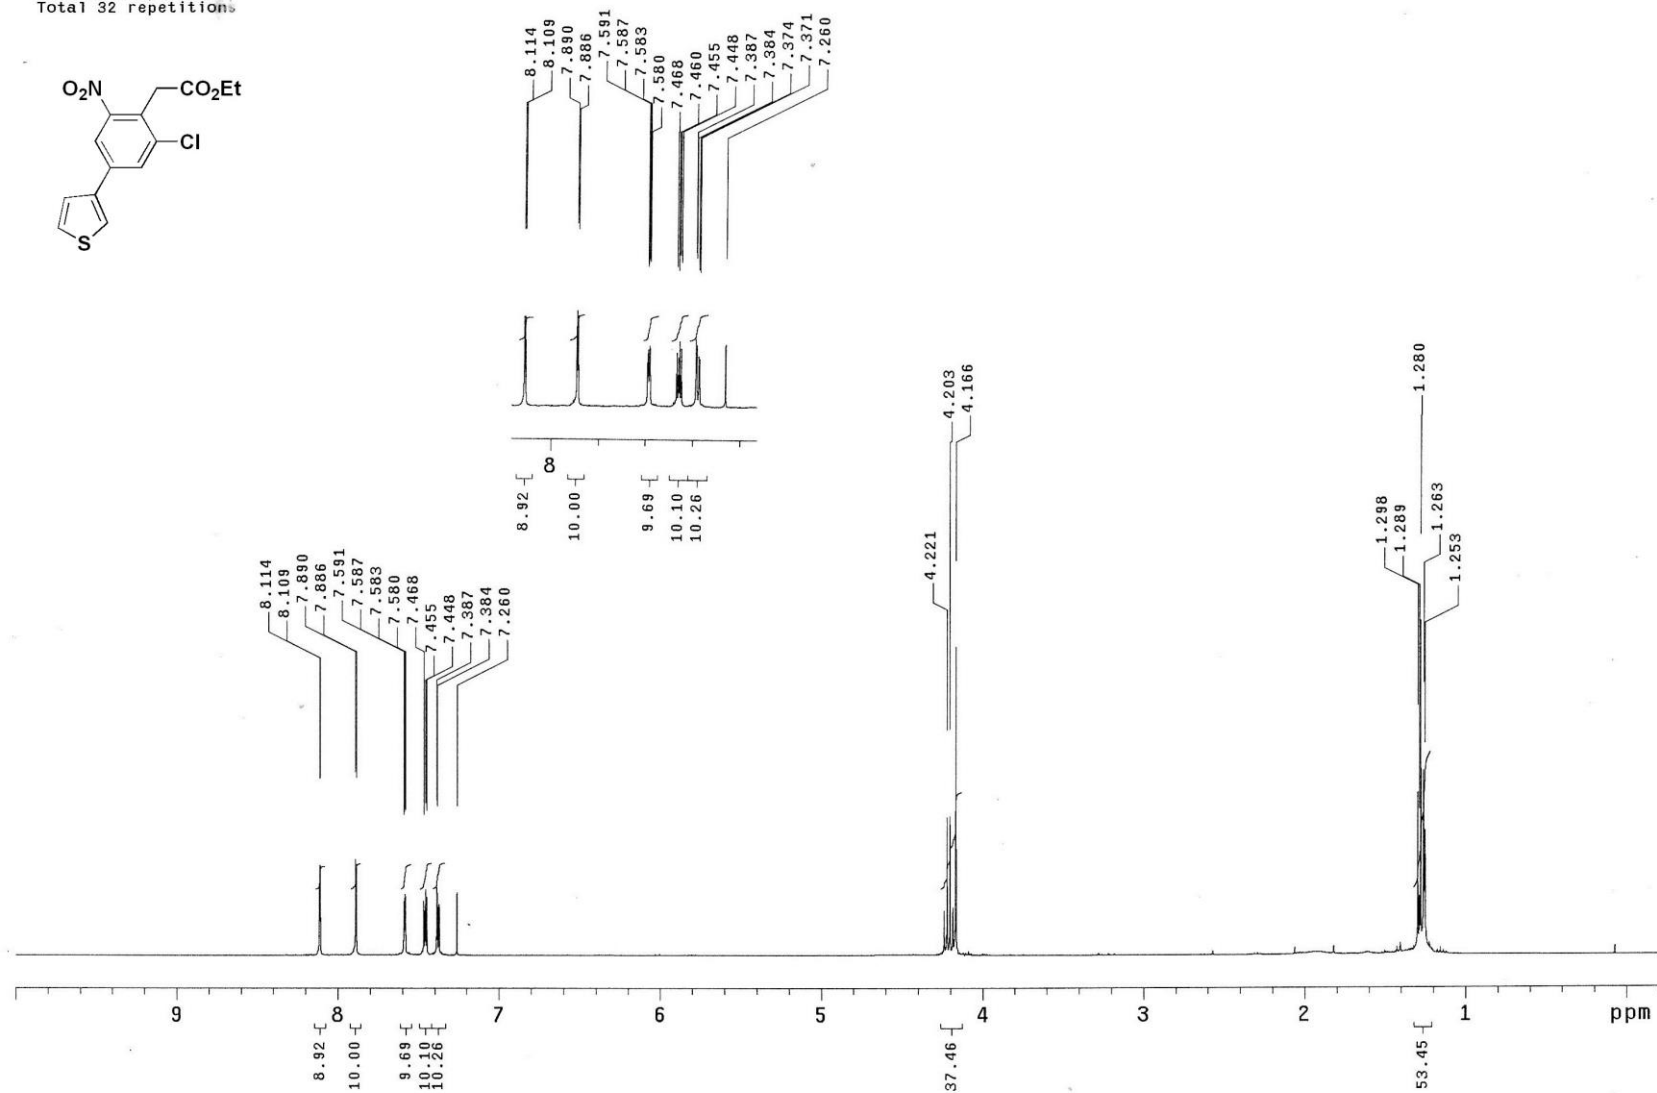

# Compound 7d (<sup>13</sup>C-NMR spectral data)

CH3742

Pulse Sequence: s2pu1  
UNITYplus-400 "unity400"  
Date: Aug 17 2023  
Solvent: CDCl<sub>3</sub>  
Ambient temperature  
Total 2048 repetitions

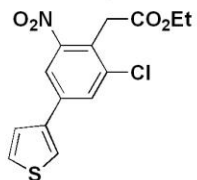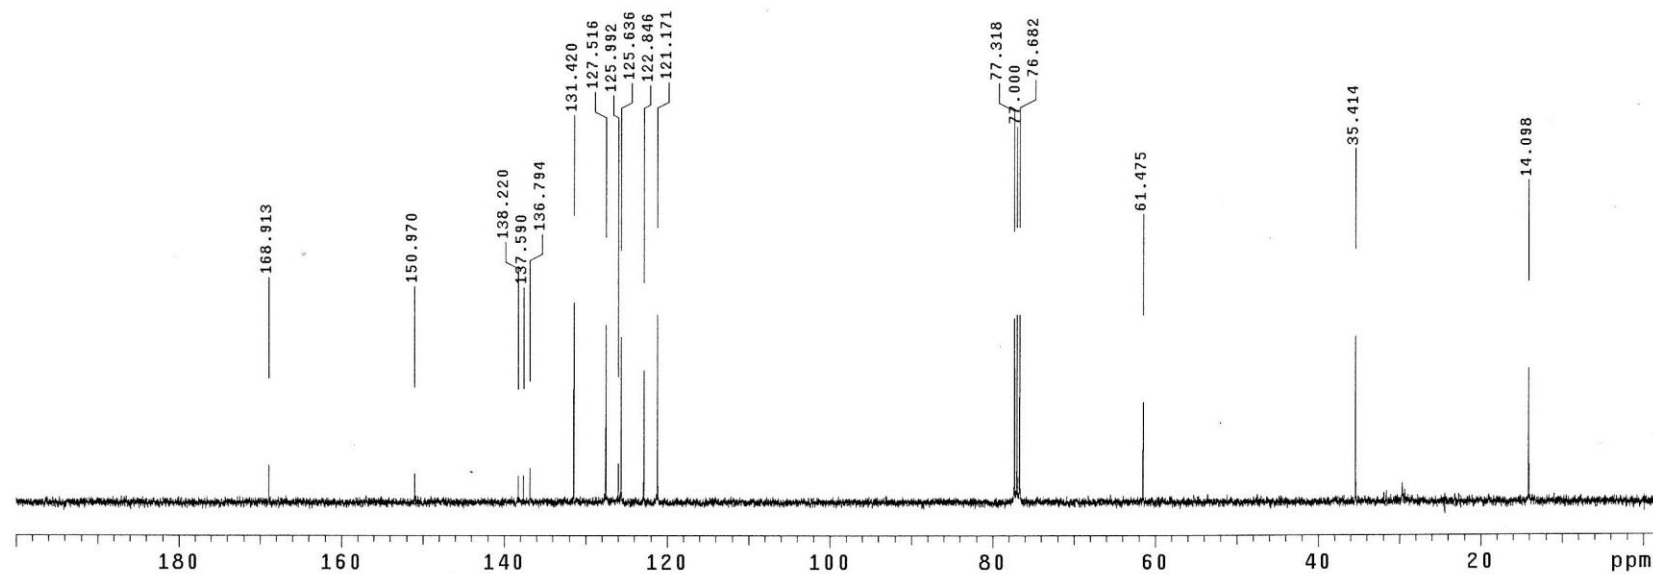

# Compound 7e (<sup>1</sup>H-NMR spectral data)

CH4756

Pulse Sequence: s2pu1  
 UNITYplus-400 "unity400"  
 Date: Aug 14 2023  
 Solvent: CDCl<sub>3</sub>  
 Ambient temperature  
 Total 32 repetitions

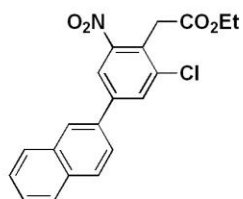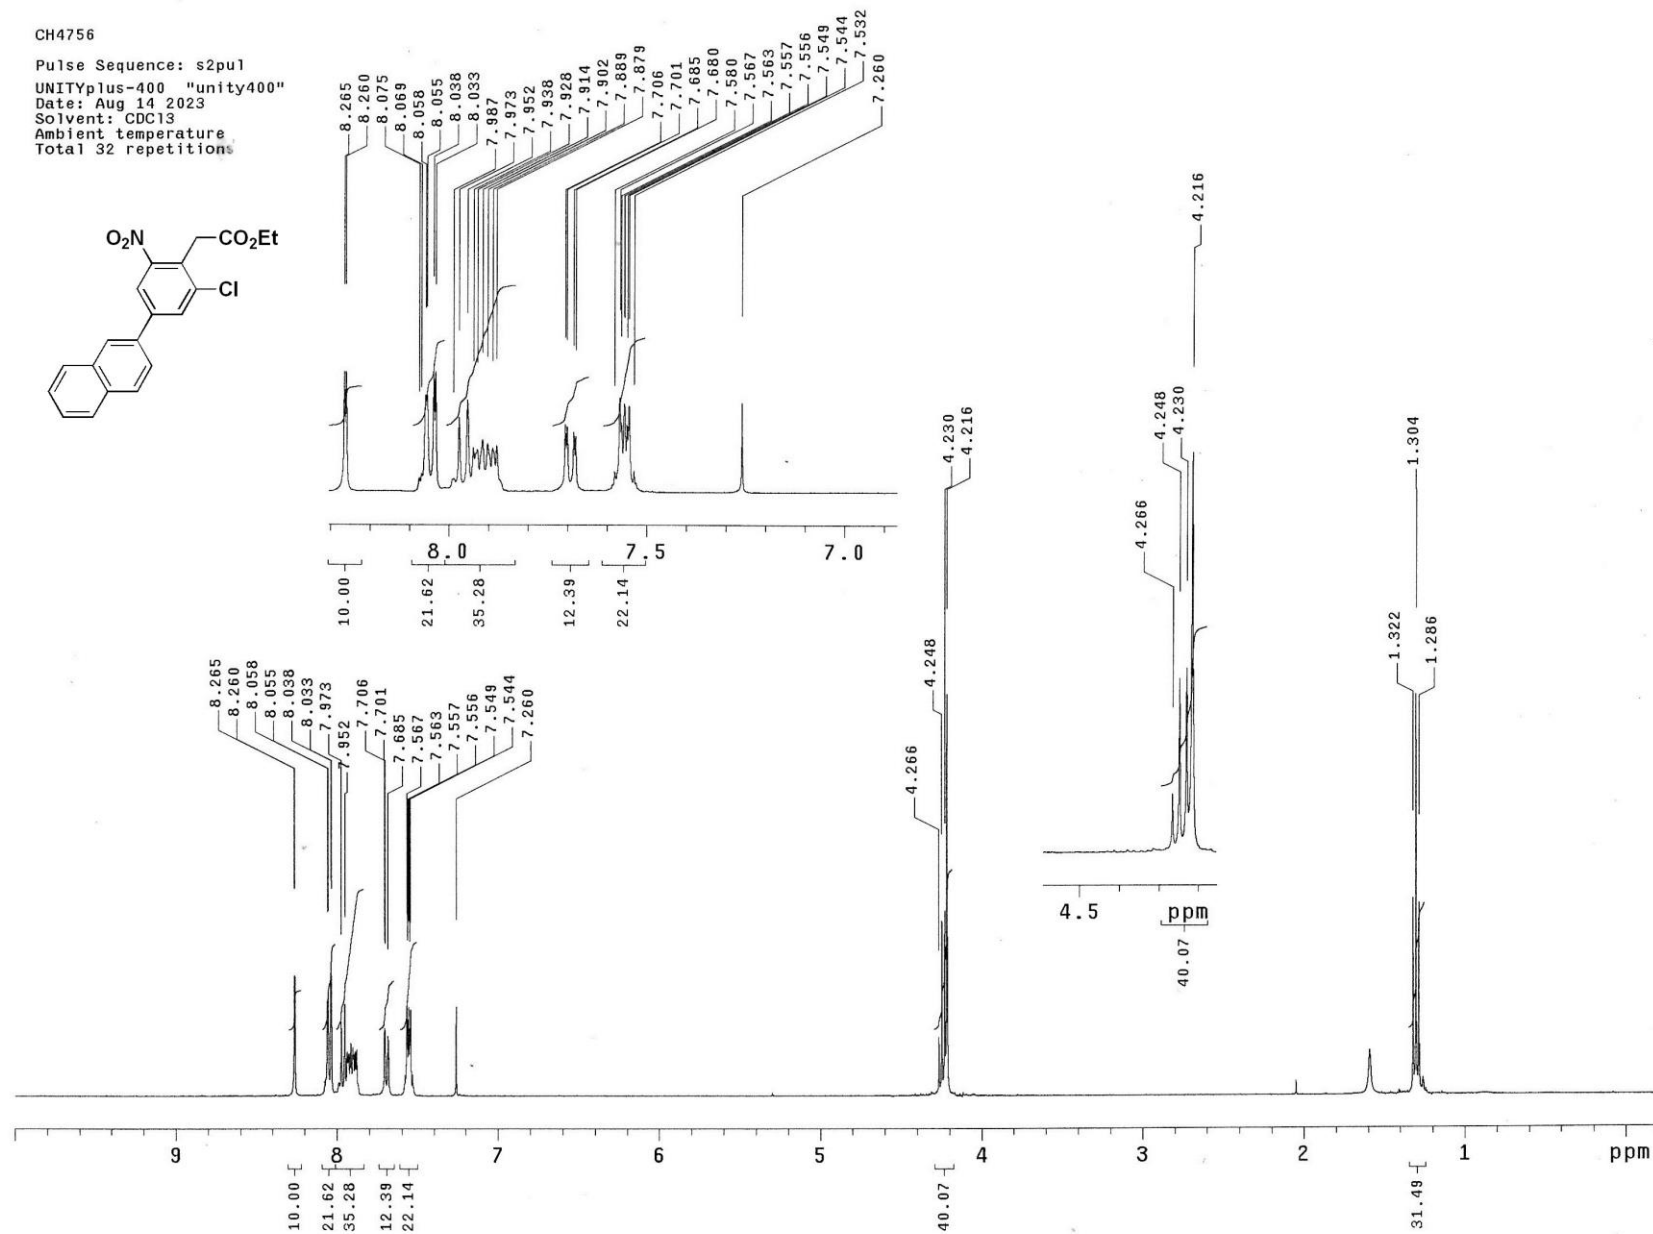

# Compound 7e (<sup>13</sup>C-NMR spectral data)

CH4756

Pulse Sequence: s2pu1  
 UNITYplus-400 "unity400"  
 Date: Aug 14 2023  
 Solvent: CDCl<sub>3</sub>  
 Ambient temperature  
 Total 3888 repetitions

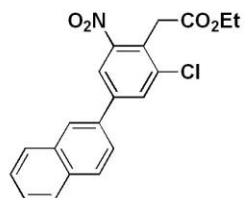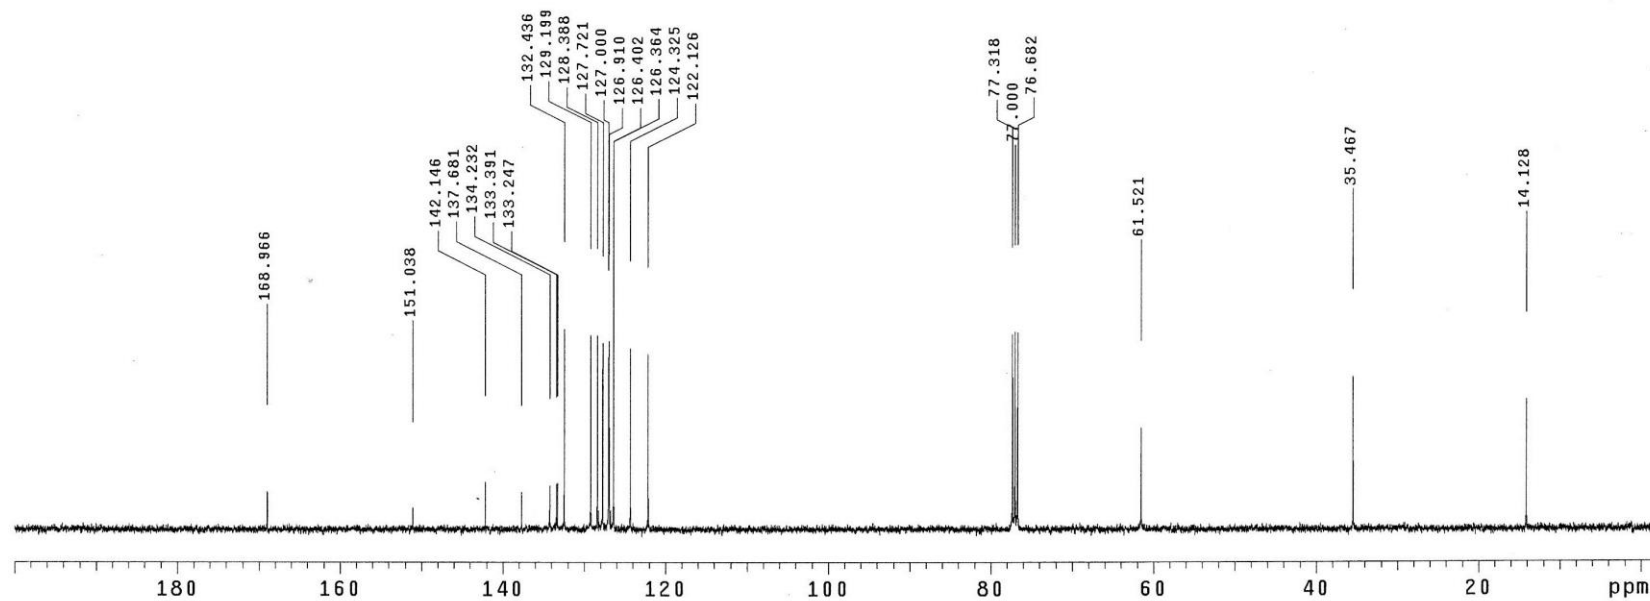

# Compound 8a (<sup>1</sup>H-NMR spectral data)

CHNF0723

Pulse Sequence: s2pu1  
 UNITYplus-400 "unity400"  
 Date: Jul 26 2023  
 Solvent: CDCl<sub>3</sub>  
 Ambient temperature  
 Total 32 repetitions

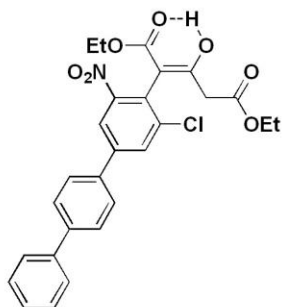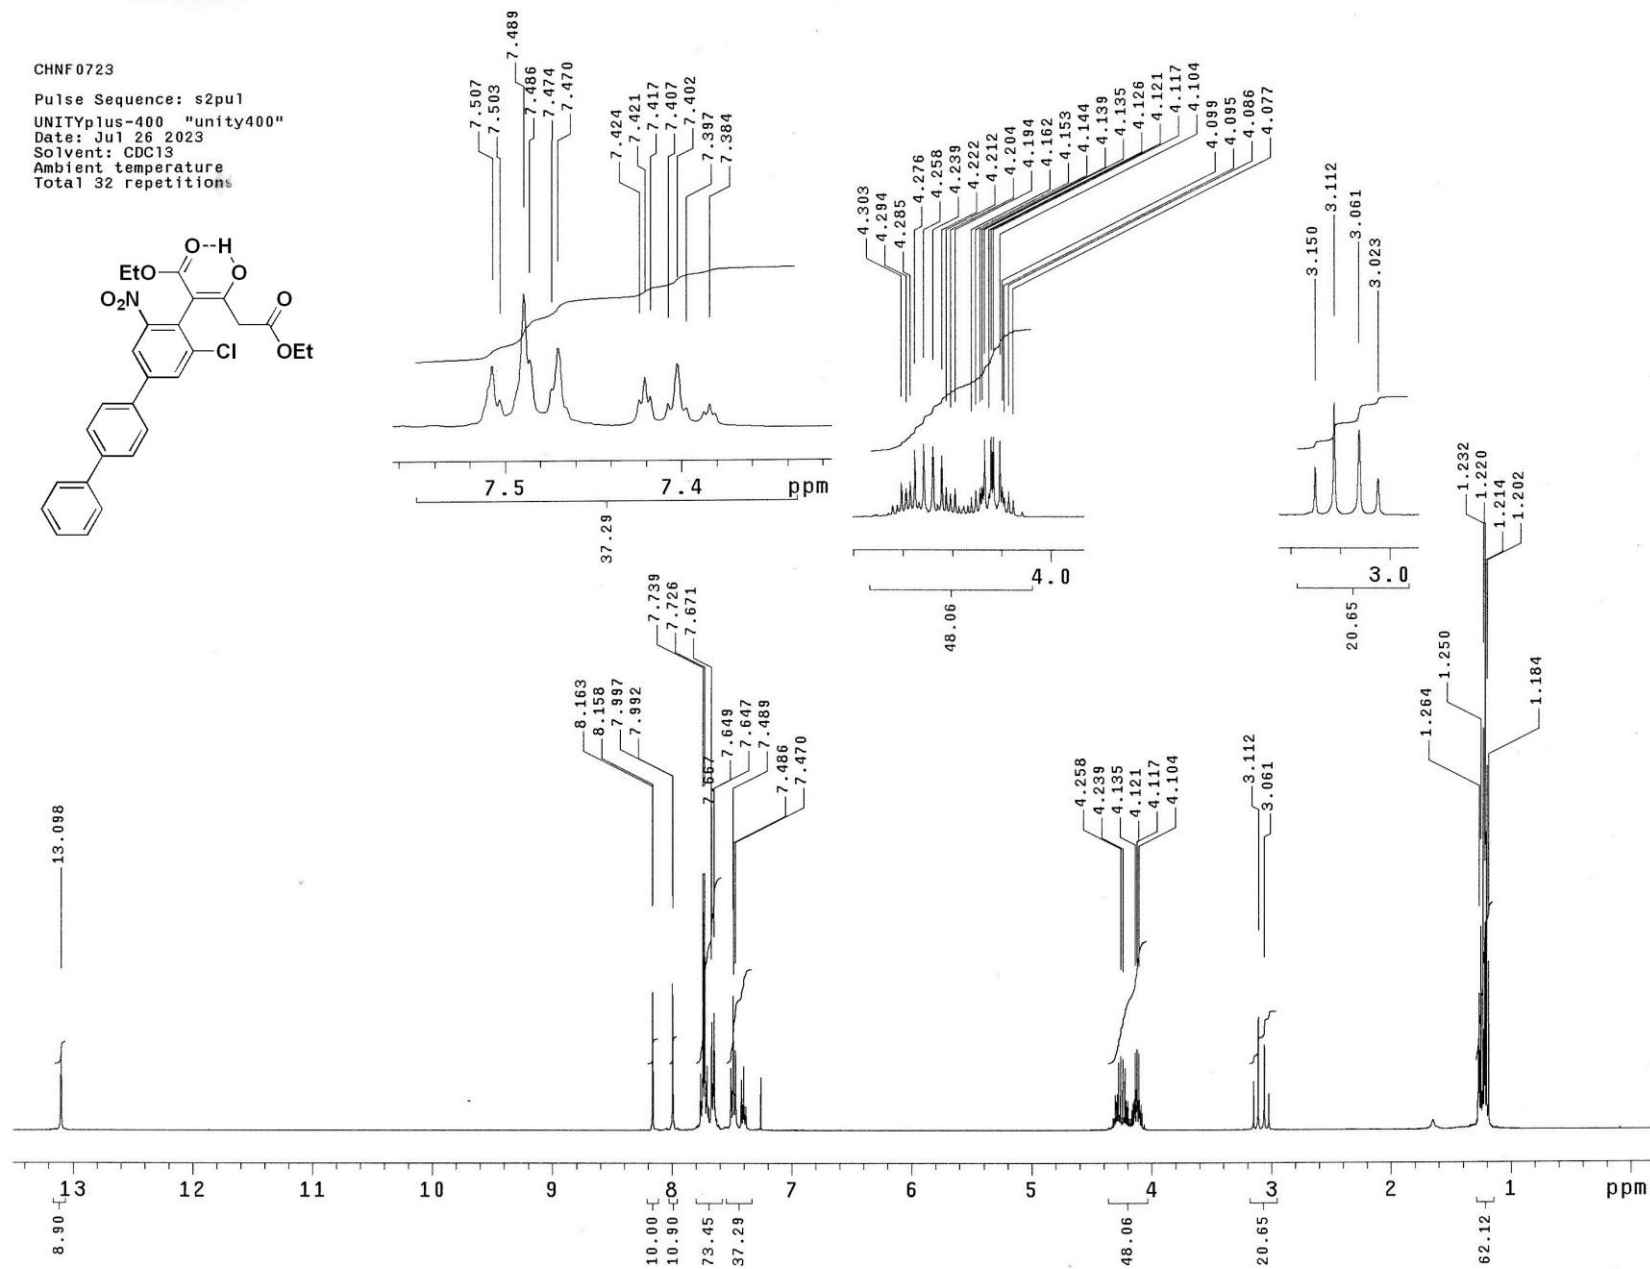

# Compound 8a (<sup>13</sup>C-NMR spectral data)

CHNF0723

Pulse Sequence: s2pu1  
 UNITYplus-400 "unity400"  
 Date: Jul 26 2023  
 Solvent: CDCl<sub>3</sub>  
 Ambient temperature  
 Total 3824 repetitions

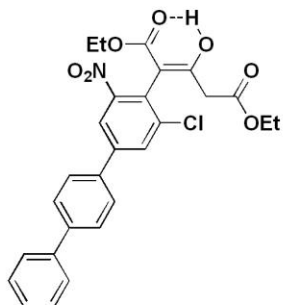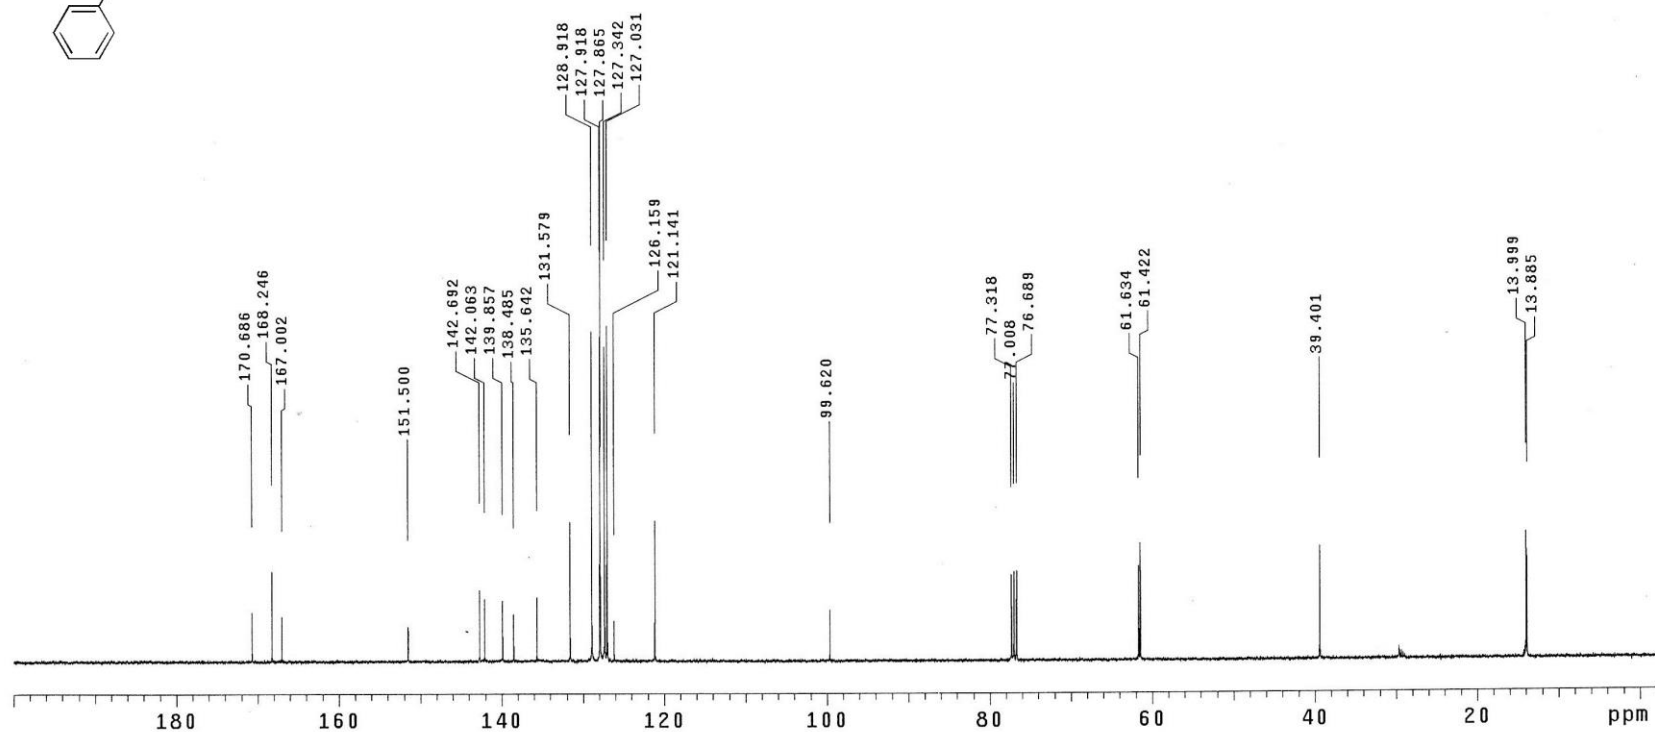

# Compound 8b (<sup>1</sup>H-NMR spectral data)

CHNF0720

Pulse Sequence: s2pu1  
 UNITYplus-400 "unity400"  
 Date: Jul 24 2023  
 Solvent: CDCl<sub>3</sub>  
 Ambient temperature  
 Total 32 repetitions

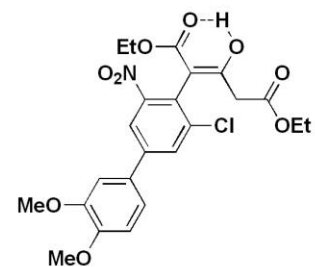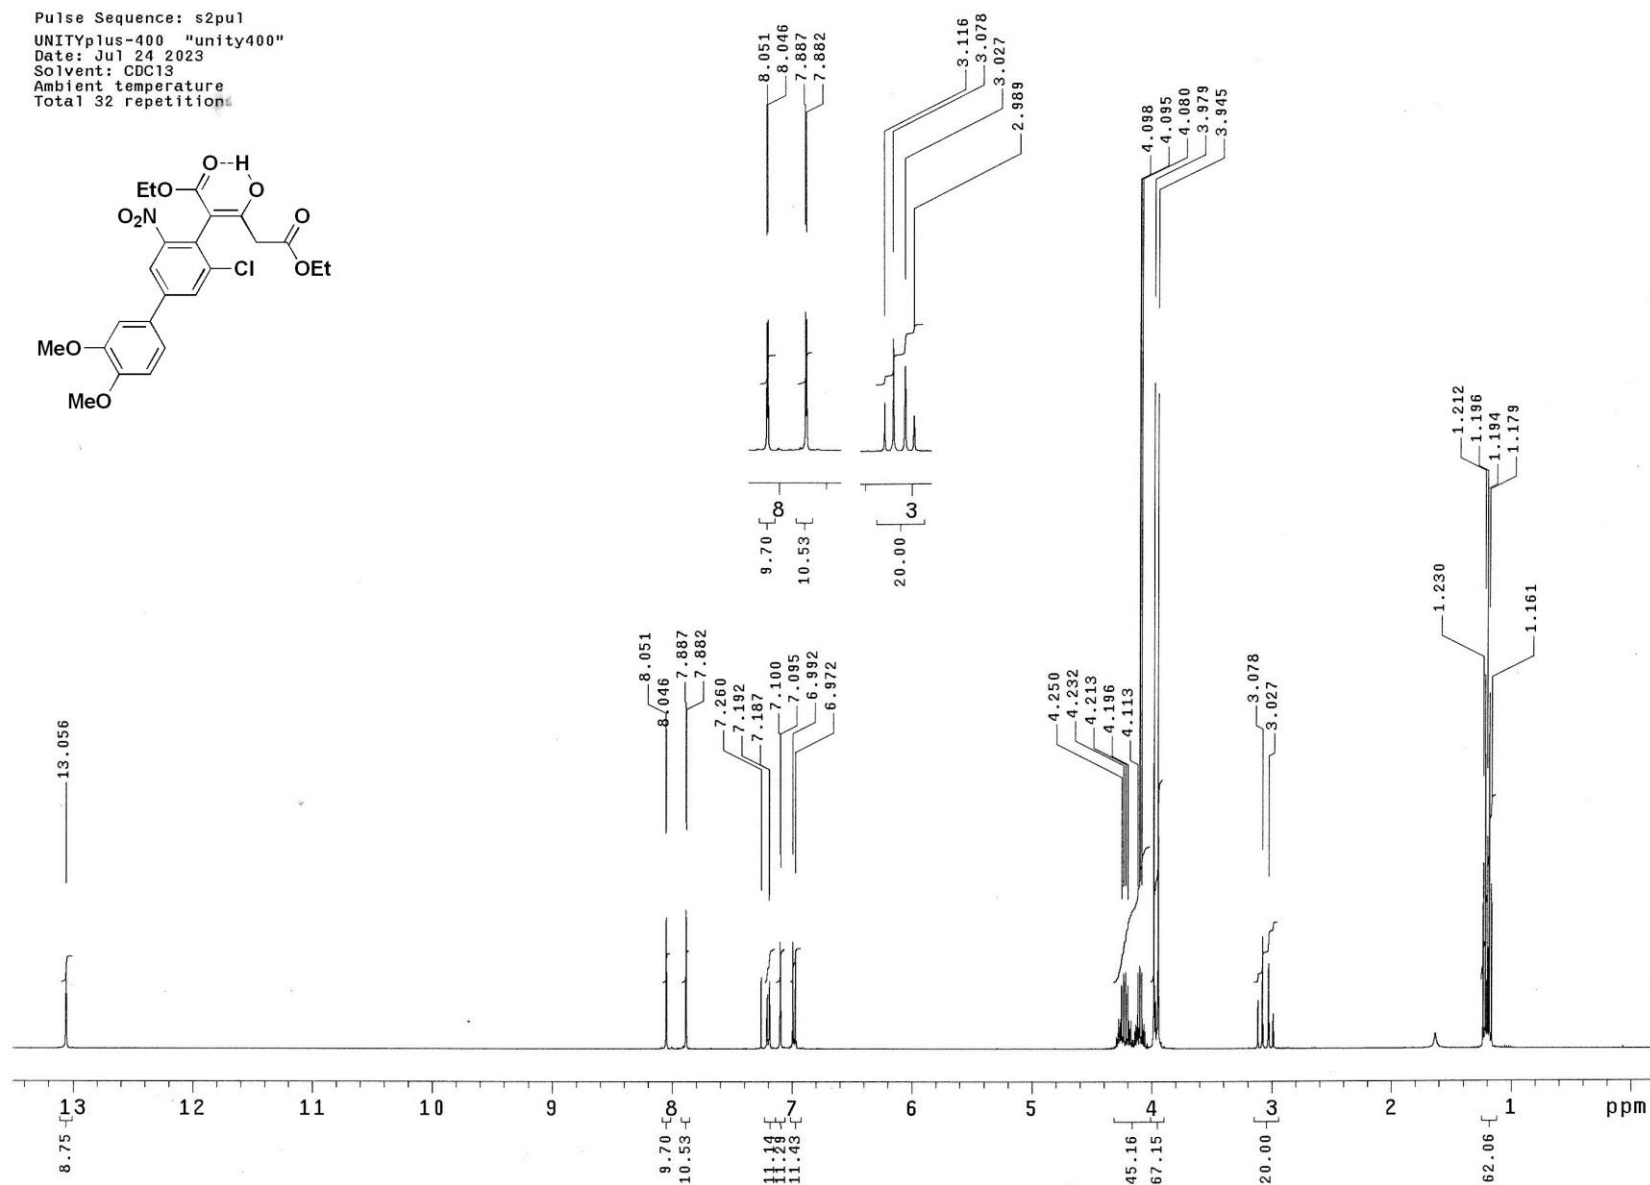

# Compound 8b (<sup>13</sup>C-NMR spectral data)

CHNF0720

Pulse Sequence: s2pu1  
 UNITYplus-400 "unity400"  
 Date: Jul 24 2023  
 Solvent: CDCl<sub>3</sub>  
 Ambient temperature  
 Total 1648 repetitions

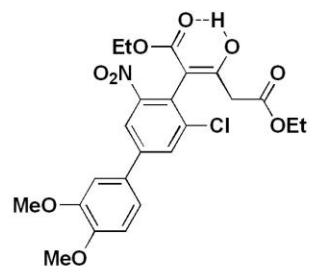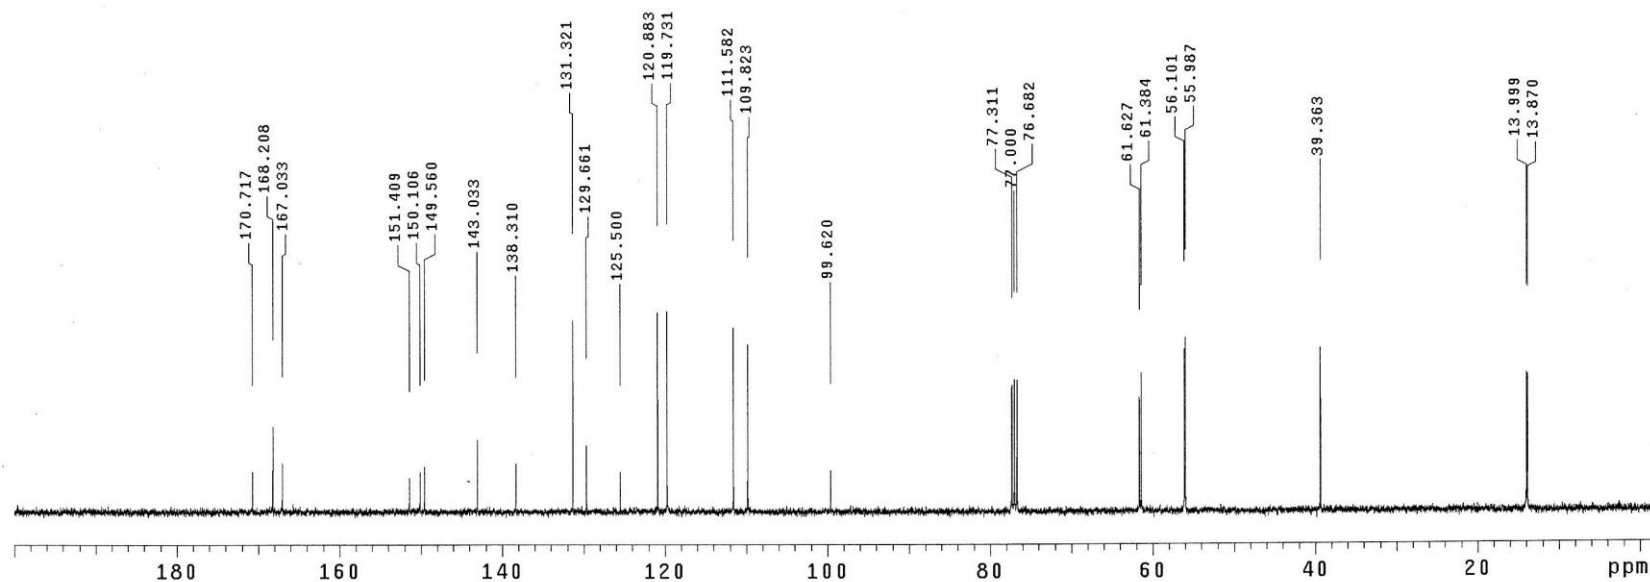



# Compound 8c (<sup>1</sup>H-NMR spectral data)

CHNF0730

Pulse Sequence: s2pu1  
 UNITYplus-400 "unity400"  
 Date: Aug 2 2023  
 Solvent: CDCl<sub>3</sub>  
 Ambient temperature  
 Total 32 repetitions

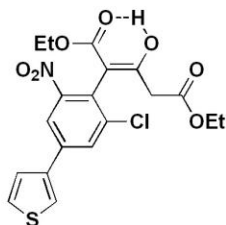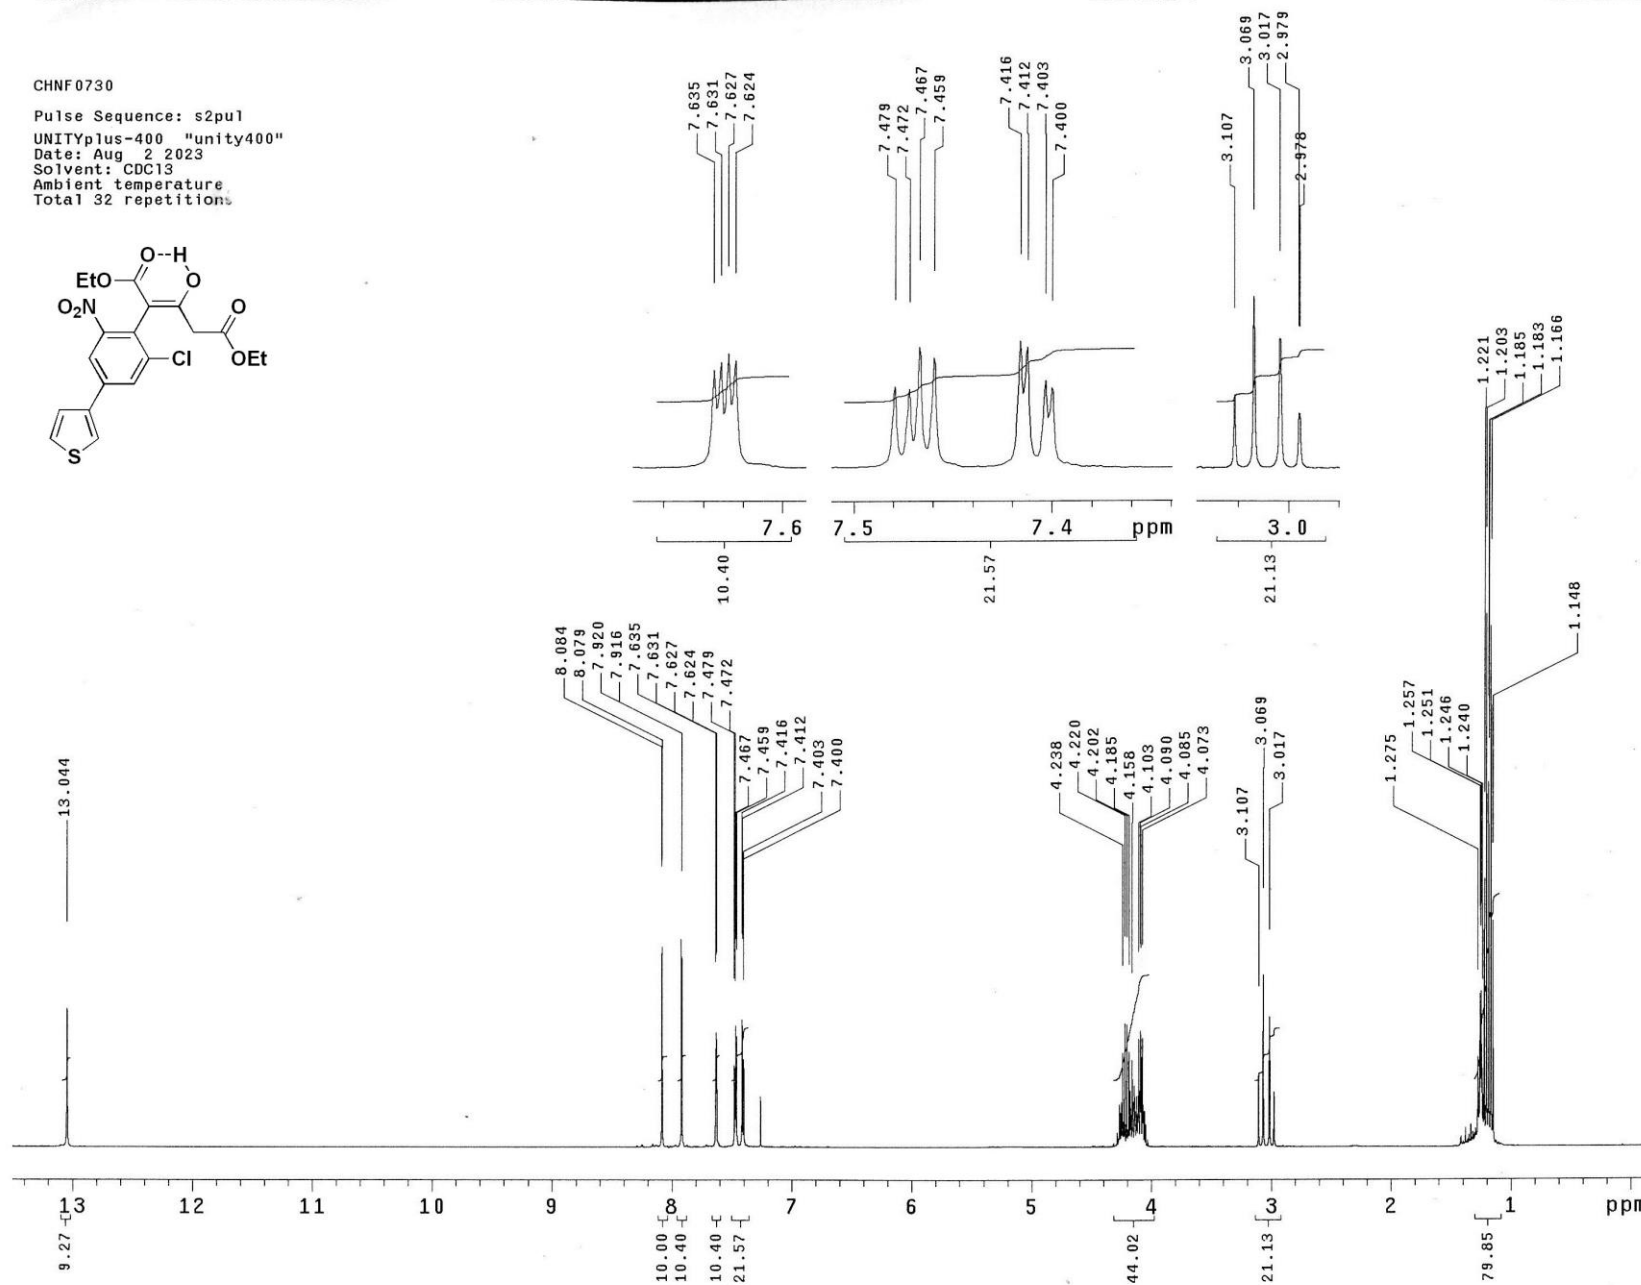

# Compound 8c (<sup>13</sup>C-NMR spectral data)

CHNF0730

Pulse Sequence: s2pu1

UNITYplus-400 "unity400"

Date: Aug 2 2023

Solvent: CDCl<sub>3</sub>

Ambient temperature

Total 1072 repetitions

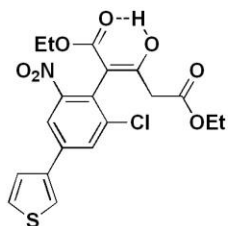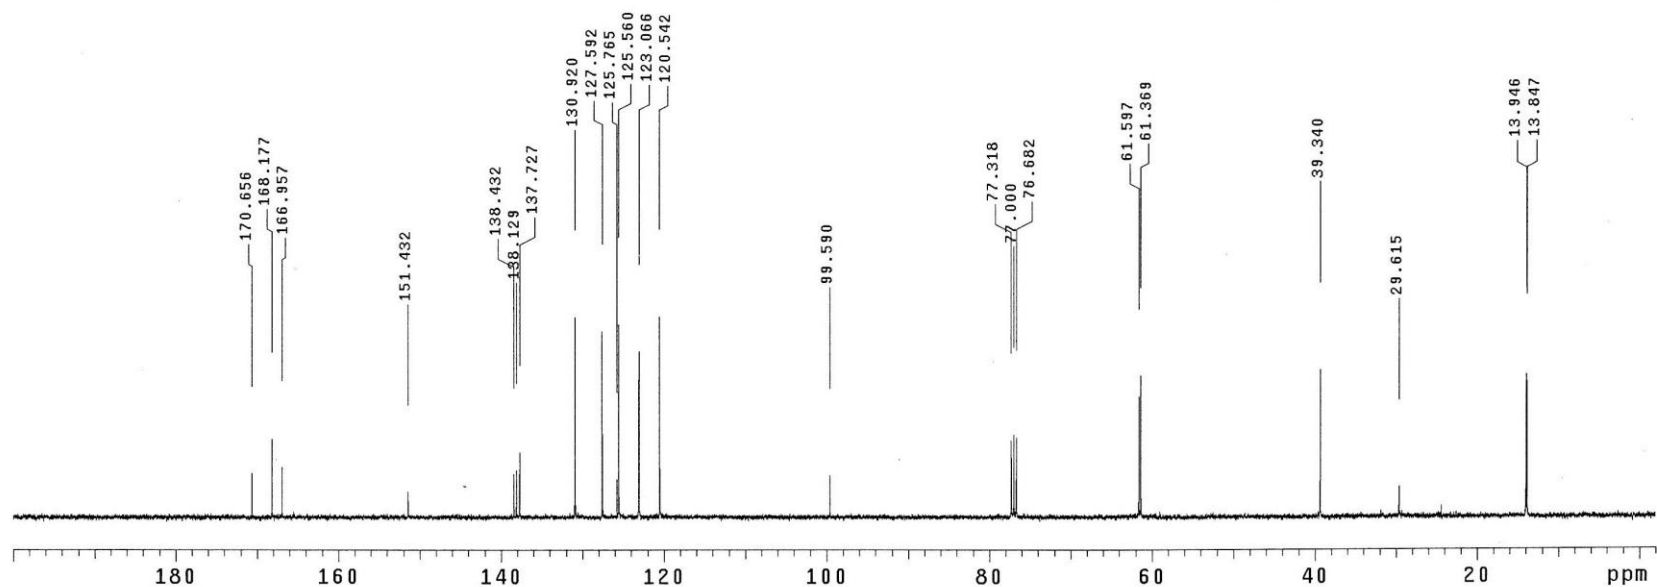

# Compound 8d (<sup>1</sup>H-NMR spectral data)

CHNF0811

Pulse Sequence: s2pu1

UNITYplus-400 "unity400"

Date: Aug 17 2023

Solvent: CDCl<sub>3</sub>

Ambient temperature

Total 192 repetitions

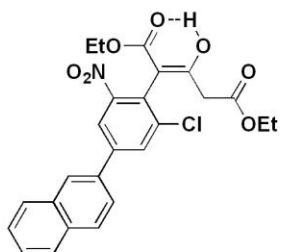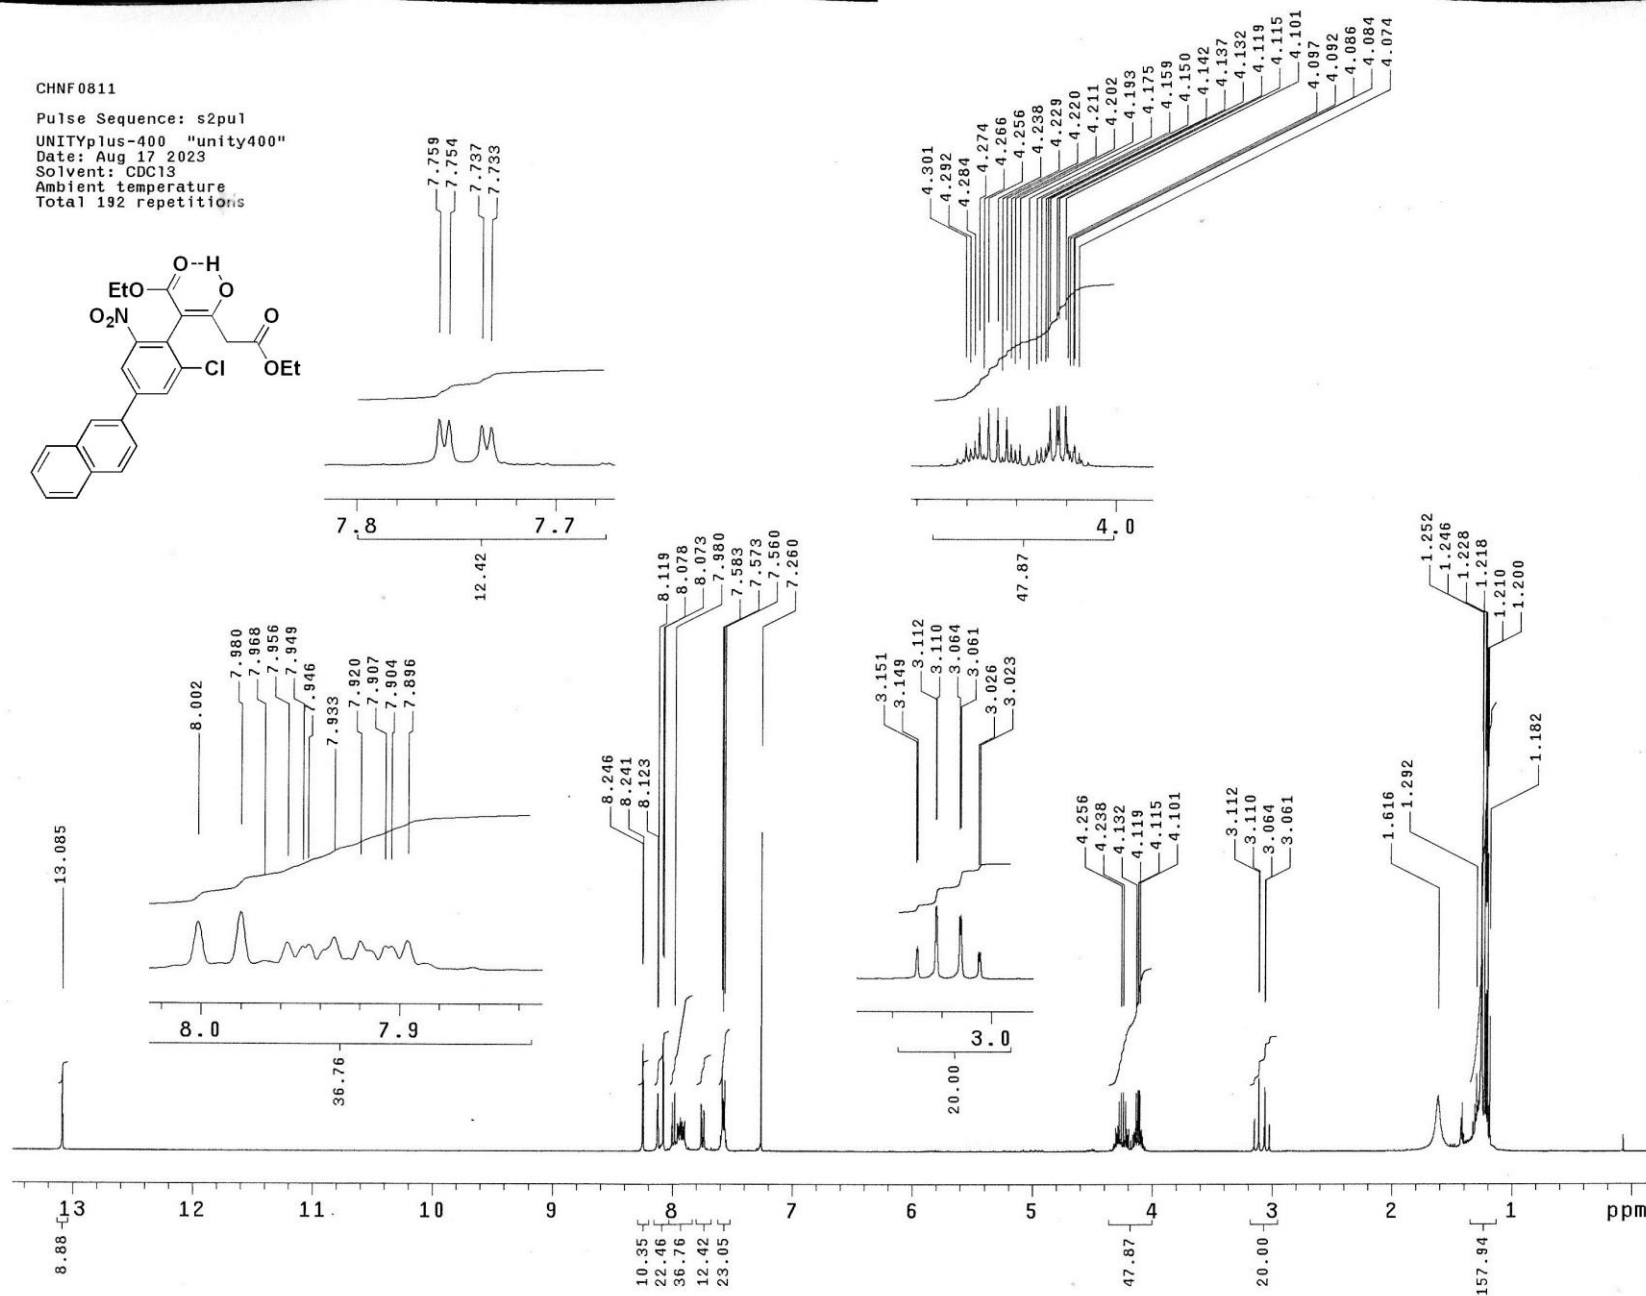

# Compound 8d (<sup>13</sup>C-NMR spectral data)

CHNF0811

Pulse Sequence: s2pu1  
 UNITYplus-600 "KMU600.kmu.edu.tw"  
 Date: Aug 17 2023  
 Solvent: cdc13  
 Ambient temperature  
 Total 1256 repetitions

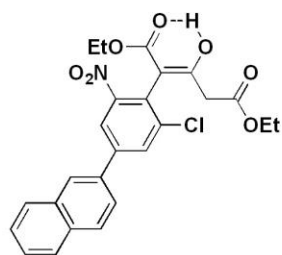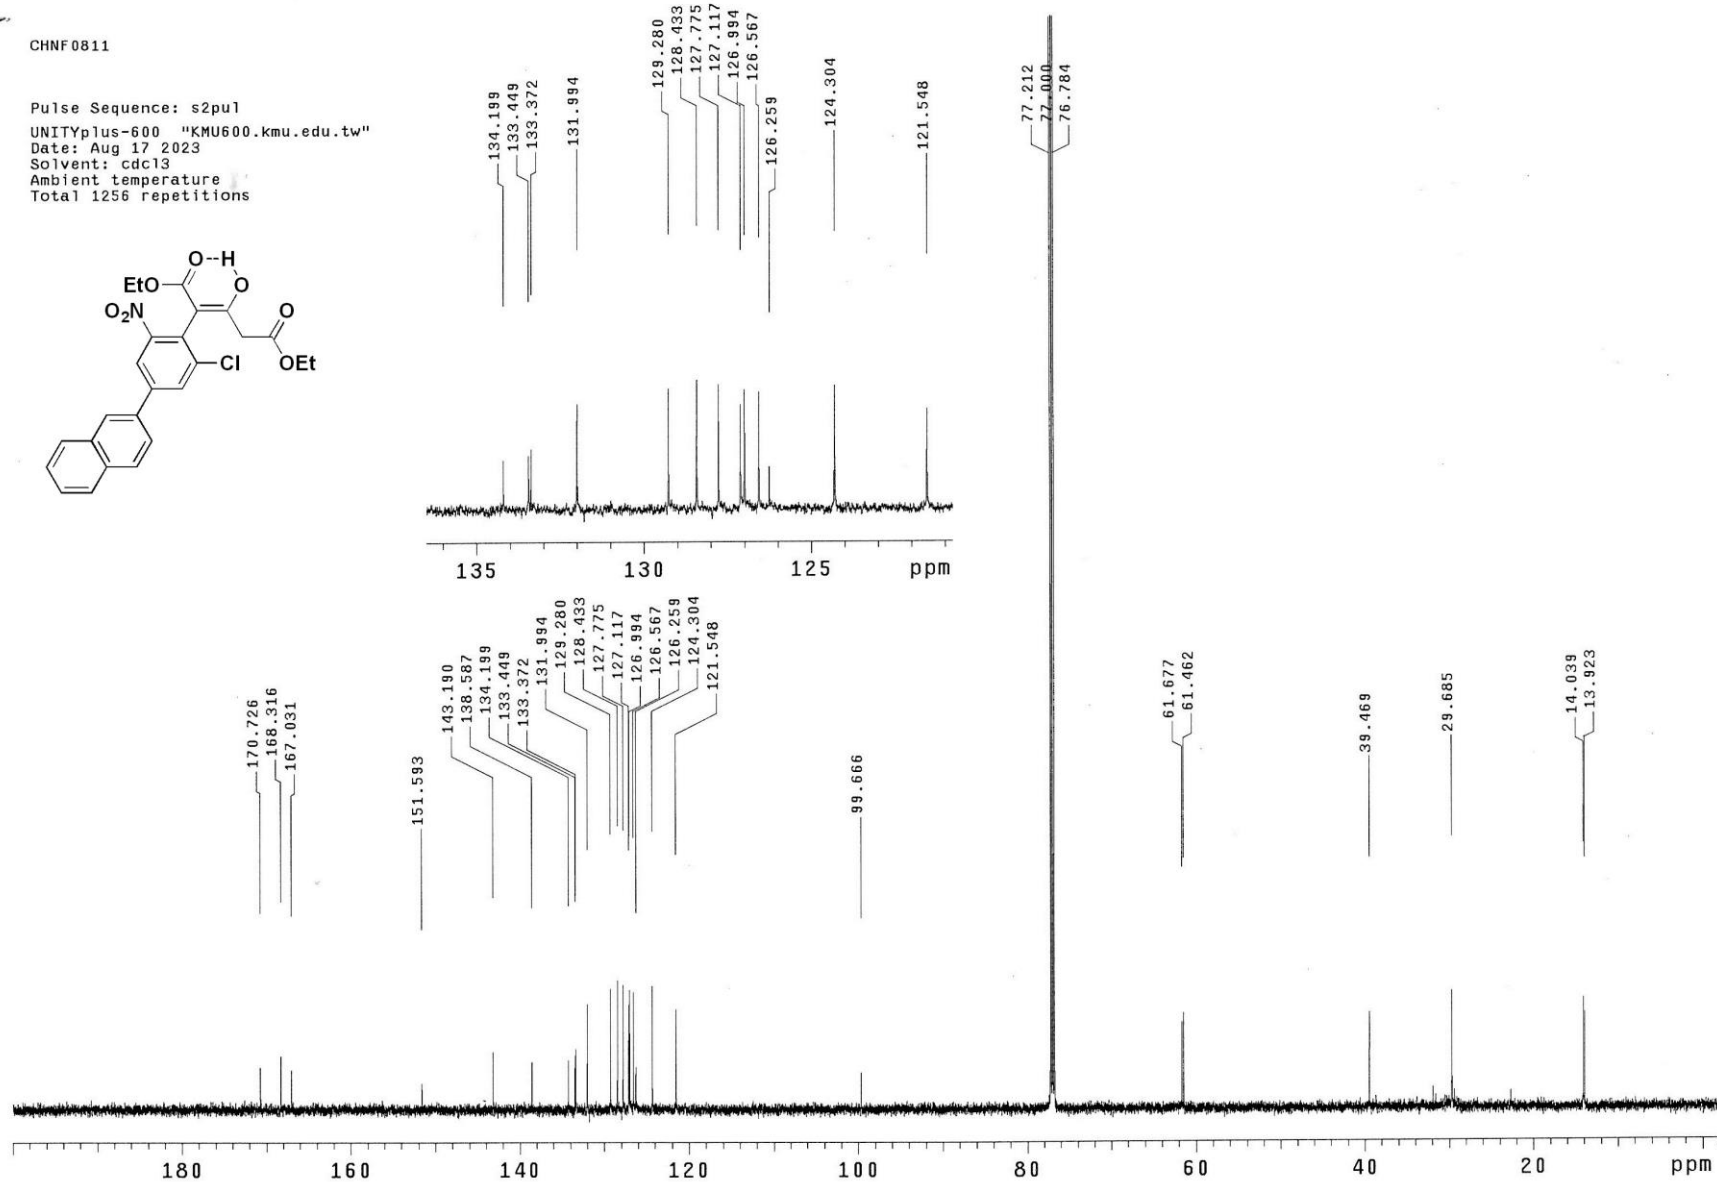

# Compound 8e (<sup>1</sup>H-NMR spectral data)

CHNF0921

Pulse Sequence: s2pu1  
 UNITYplus-400 "unity400"  
 Date: Sep 21 2023  
 Solvent: CDCl<sub>3</sub>  
 Ambient temperature  
 Total 64 repetition

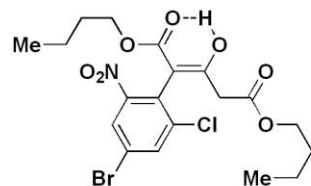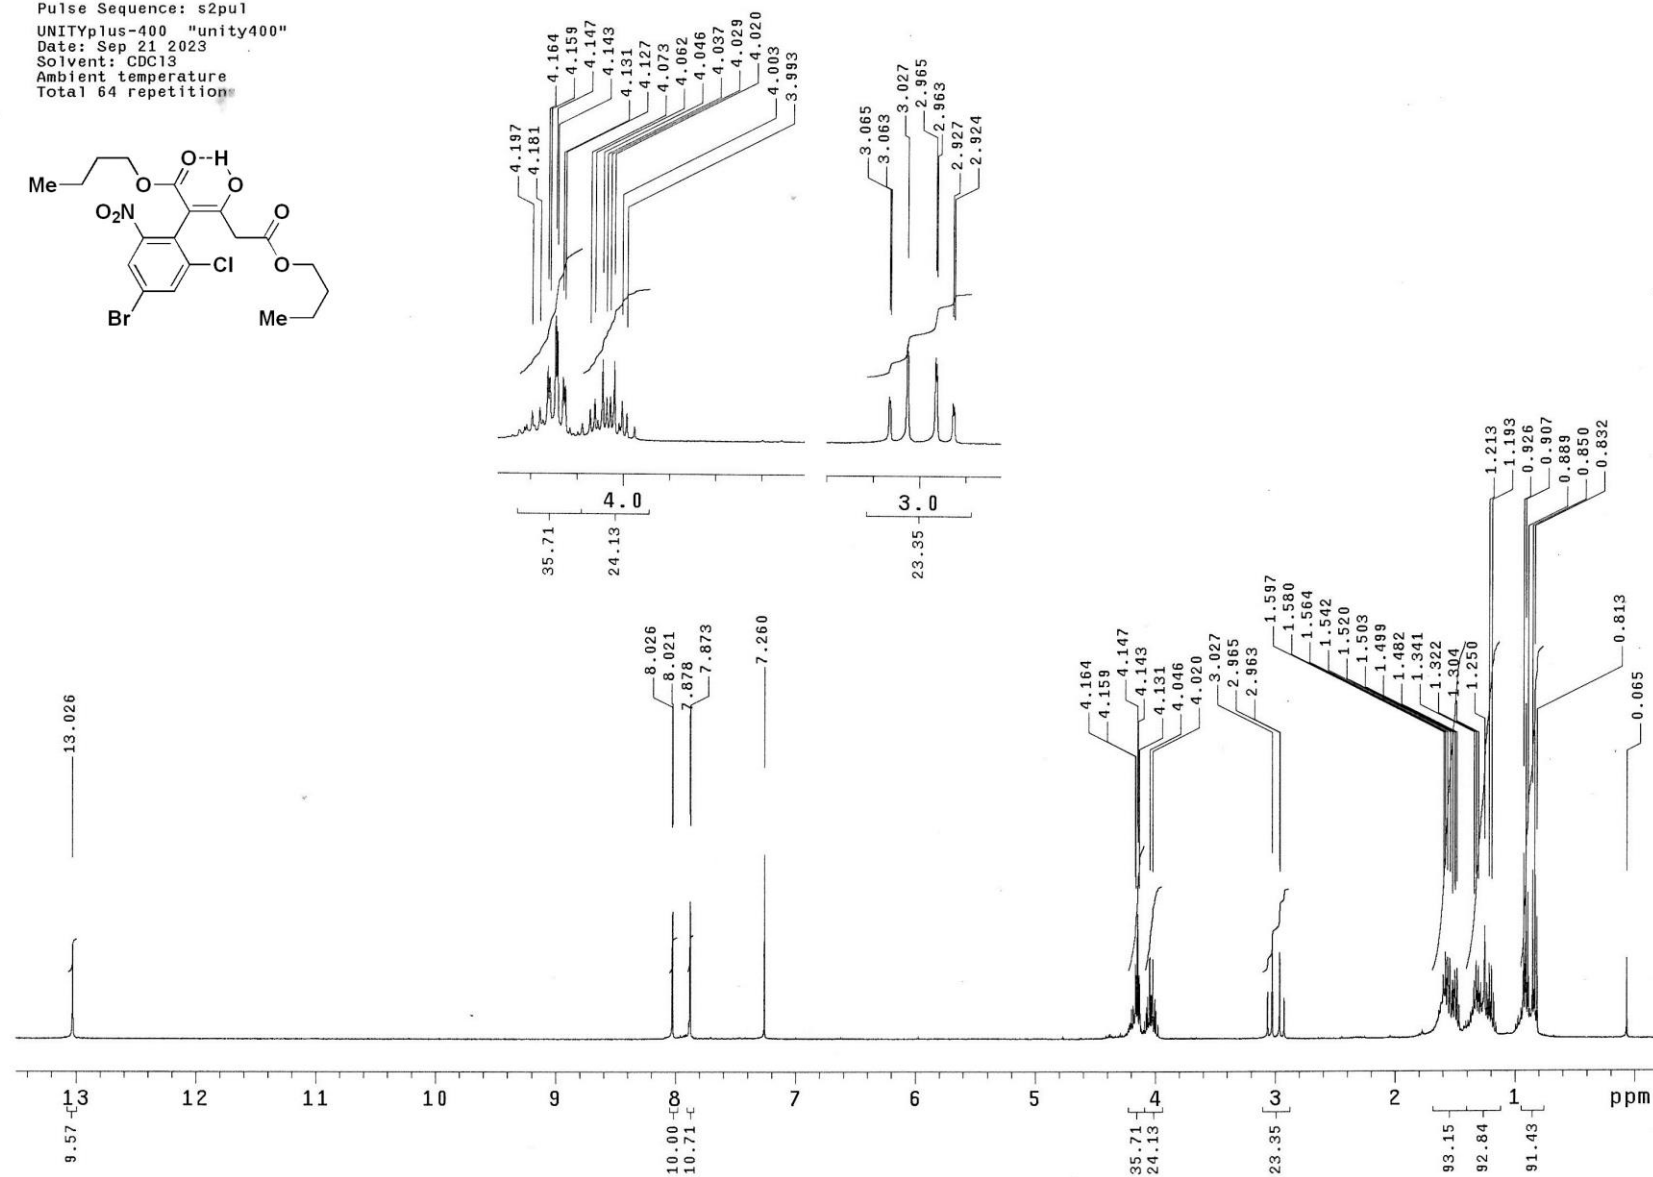

# Compound 8e (<sup>13</sup>C-NMR spectral data)

CHNF0921

Pulse Sequence: s2pu1  
 UNITYplus-400 "unity400"  
 Date: Sep 21 2023  
 Solvent: CDCl<sub>3</sub>  
 Ambient temperature  
 File: U0315-4  
 Total 8672 repetitions

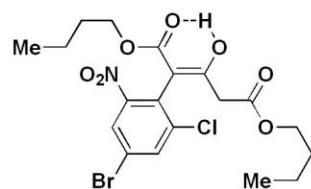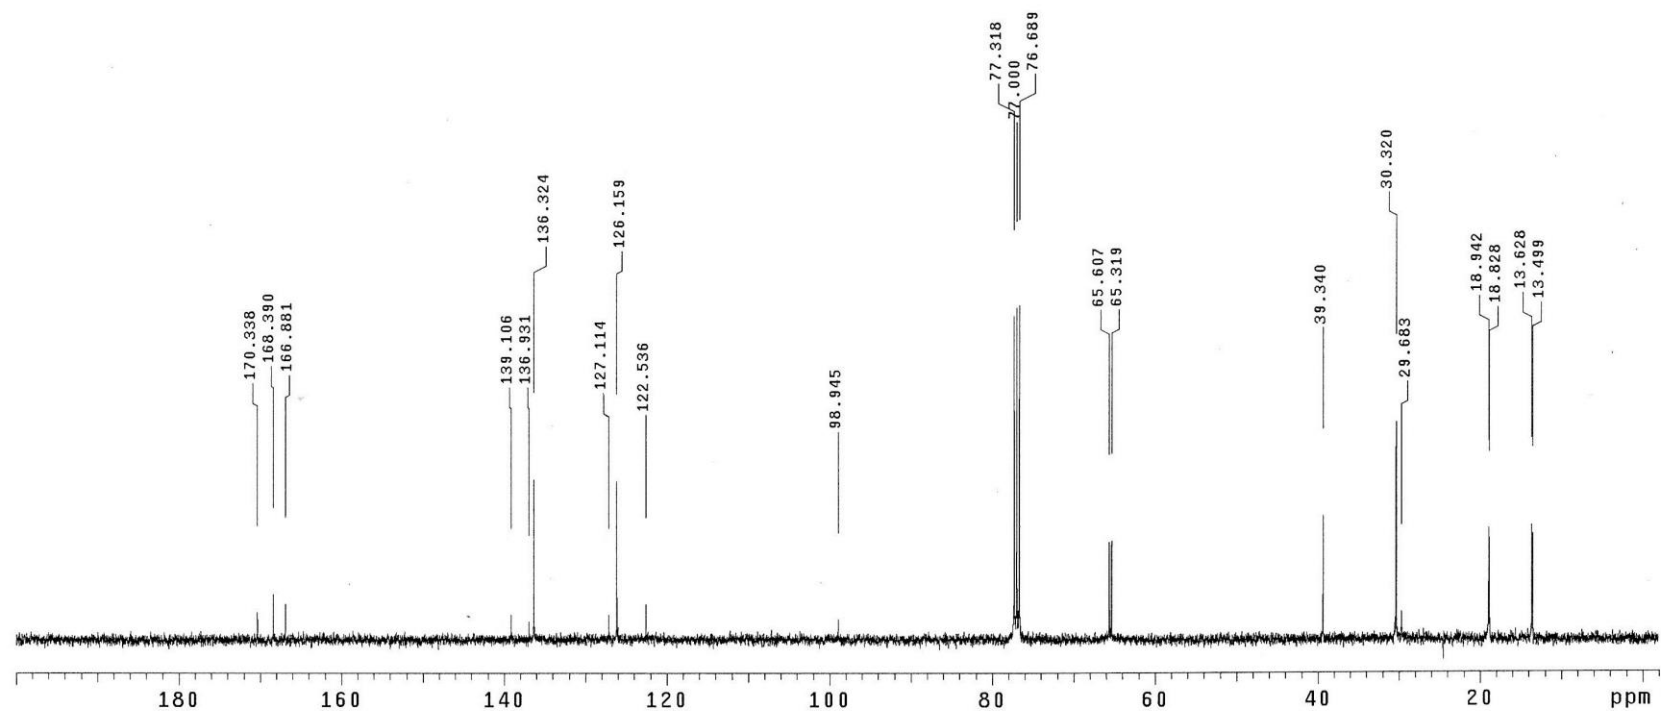

## X-ray crystal data of compound 4a

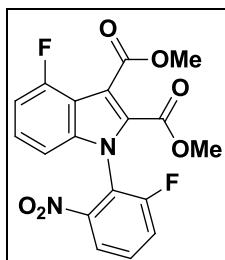

**Sample preparation** : A solution of compound **4a** (30 mg) in CH<sub>2</sub>Cl<sub>2</sub> (10 mL) was placed in a tube (10 mL). EtOAc (2 mL) was added slowly to the vial with a dropper. The vial was closed with little cotton and kept at room temperature for 2 days. Then, colorless prisms were observed.

**Crystal measurement** : X-ray crystal structures were determined with a Bruker Enraf-Nonius single-crystal diffractometer (CAD4, Kappa CCD). Thermal ellipsoids are drawn at 50% probability level.

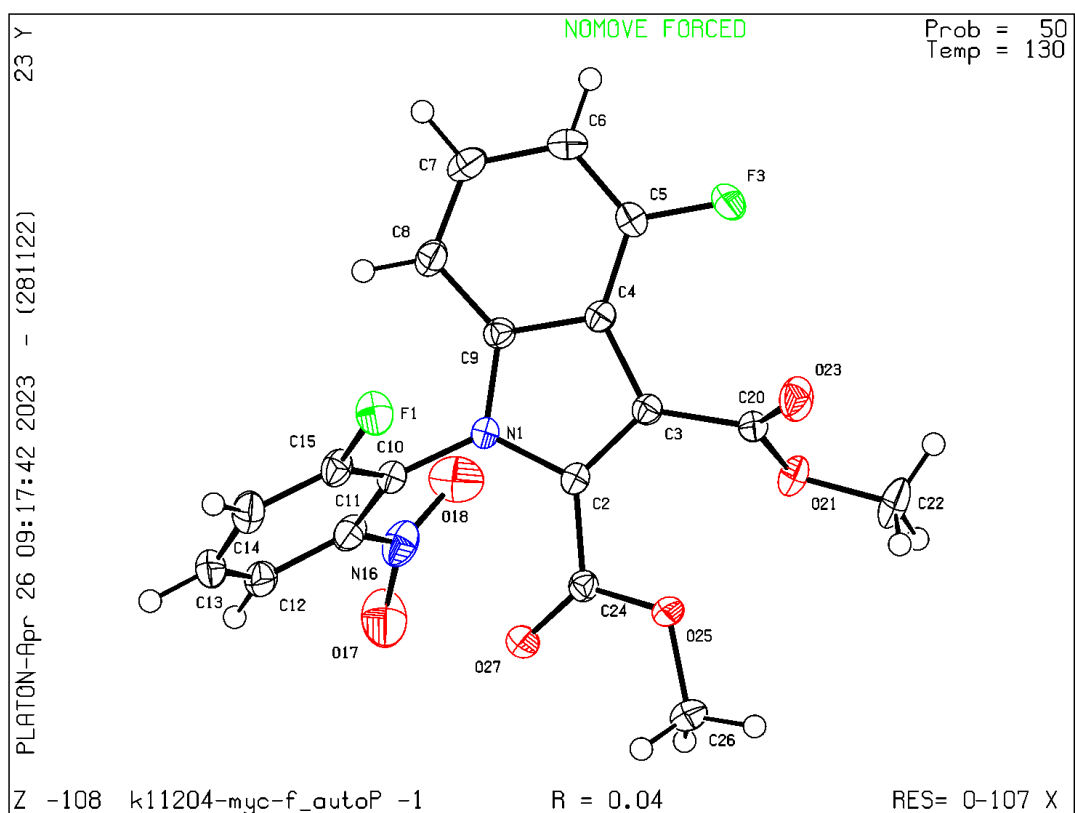

|                                             |                                                                              |
|---------------------------------------------|------------------------------------------------------------------------------|
| Empirical formula                           | C <sub>18</sub> H <sub>12</sub> F <sub>2</sub> N <sub>2</sub> O <sub>6</sub> |
| Formula weight                              | 390.30                                                                       |
| Temperature/K                               | 130(2)                                                                       |
| Crystal system                              | triclinic                                                                    |
| Space group                                 | P-1                                                                          |
| a/Å                                         | 7.8953(2)                                                                    |
| b/Å                                         | 10.6880(2)                                                                   |
| c/Å                                         | 10.9838(2)                                                                   |
| α/°                                         | 68.919(2)                                                                    |
| β/°                                         | 77.025(2)                                                                    |
| γ/°                                         | 82.949(2)                                                                    |
| Volume/Å <sup>3</sup>                       | 841.86(3)                                                                    |
| Z                                           | 2                                                                            |
| ρ <sub>calc</sub> /cm <sup>3</sup>          | 1.540                                                                        |
| μ/mm <sup>-1</sup>                          | 0.131                                                                        |
| F(000)                                      | 400.0                                                                        |
| Crystal size/mm <sup>3</sup>                | 0.5 × 0.4 × 0.4                                                              |
| Radiation                                   | Mo Kα (λ = 0.71073)                                                          |
| 2θ range for data collection/°              | 4.052 to 53.942                                                              |
| Index ranges                                | -9 ≤ h ≤ 9, -13 ≤ k ≤ 13, -13 ≤ l ≤ 13                                       |
| Reflections collected                       | 22714                                                                        |
| Independent reflections                     | 3516 [R <sub>int</sub> = 0.0359, R <sub>sigma</sub> = 0.0240]                |
| Data/restraints/parameters                  | 3516/0/256                                                                   |
| Goodness-of-fit on F <sup>2</sup>           | 1.068                                                                        |
| Final R indexes [I ≥ 2σ (I)]                | R <sub>1</sub> = 0.0389, wR <sub>2</sub> = 0.0995                            |
| Final R indexes [all data]                  | R <sub>1</sub> = 0.0456, wR <sub>2</sub> = 0.1035                            |
| Largest diff. peak/hole / e Å <sup>-3</sup> | 0.44/-0.23                                                                   |



## X-ray crystal data of compound 4g

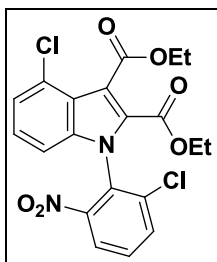

**Sample preparation** : A solution of compound **4g** (30 mg) in CH<sub>2</sub>Cl<sub>2</sub> (10 mL) was placed in a tube (10 mL). EtOAc (2 mL) was added slowly to the vial with a dropper. The vial was closed with little cotton and kept at room temperature for 2 days. Then, colorless prisms were observed.

**Crystal measurement** : X-ray crystal structures were determined with a Bruker Enraf-Nonius single-crystal diffractometer (CAD4, Kappa CCD). Thermal ellipsoids are drawn at 50% probability level.

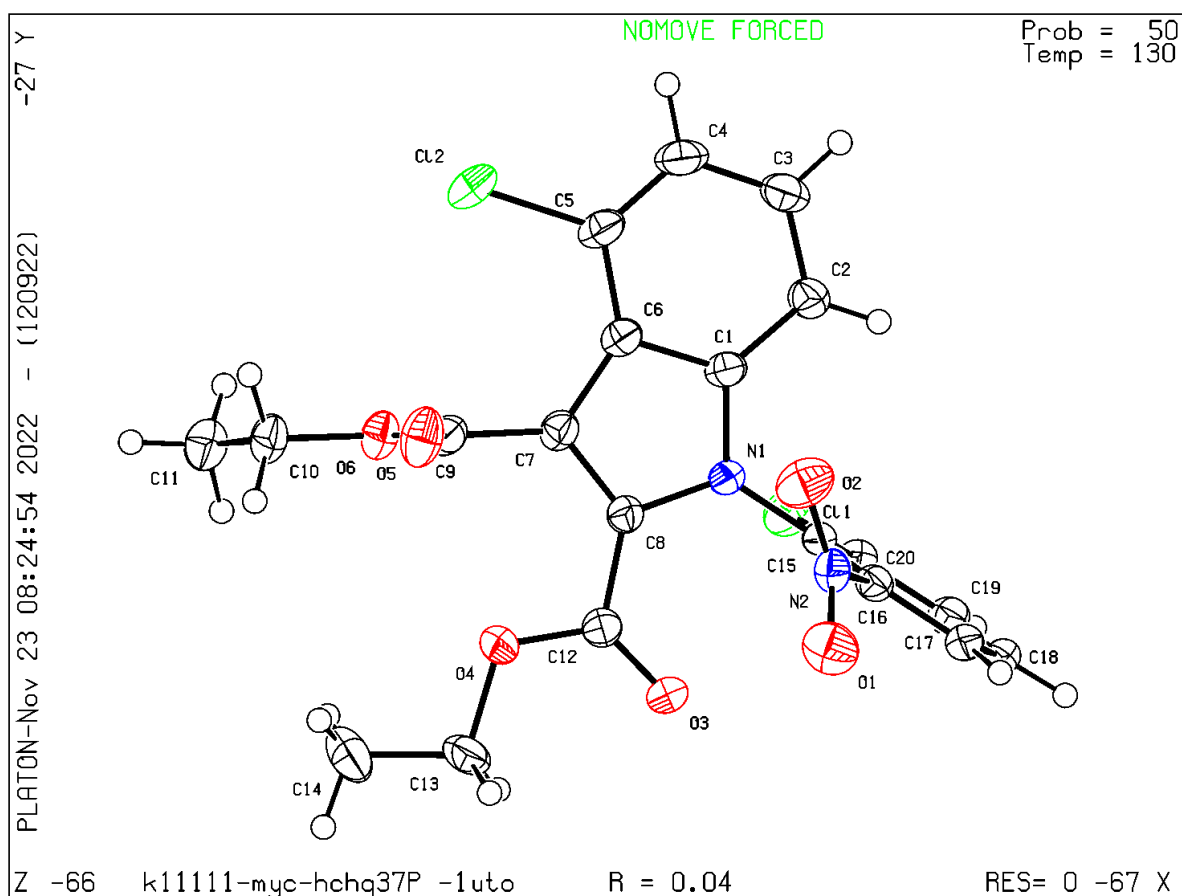

|                                             |                                                                               |
|---------------------------------------------|-------------------------------------------------------------------------------|
| Empirical formula                           | C <sub>20</sub> H <sub>16</sub> Cl <sub>2</sub> N <sub>2</sub> O <sub>6</sub> |
| Formula weight                              | 451.25                                                                        |
| Temperature/K                               | 130(2)                                                                        |
| Crystal system                              | triclinic                                                                     |
| Space group                                 | P-1                                                                           |
| a/Å                                         | 8.0746(2)                                                                     |
| b/Å                                         | 8.2867(3)                                                                     |
| c/Å                                         | 16.9277(3)                                                                    |
| $\alpha$ /°                                 | 95.590(2)                                                                     |
| $\beta$ /°                                  | 98.647(2)                                                                     |
| $\gamma$ /°                                 | 114.340(3)                                                                    |
| Volume/Å <sup>3</sup>                       | 1004.16(5)                                                                    |
| Z                                           | 2                                                                             |
| $\rho_{\text{calc}}$ /cm <sup>3</sup>       | 1.492                                                                         |
| $\mu$ /mm <sup>-1</sup>                     | 0.365                                                                         |
| F(000)                                      | 464.0                                                                         |
| Crystal size/mm <sup>3</sup>                | 0.5 × 0.4 × 0.4                                                               |
| Radiation                                   | Mo K $\alpha$ ( $\lambda$ = 0.71073)                                          |
| 2 $\Theta$ range for data collection/°      | 4.946 to 49.98                                                                |
| Index ranges                                | -9 ≤ h ≤ 9, -9 ≤ k ≤ 9, -20 ≤ l ≤ 20                                          |
| Reflections collected                       | 25407                                                                         |
| Independent reflections                     | 3539 [ $R_{\text{int}}$ = 0.0369, $R_{\text{sigma}}$ = 0.0228]                |
| Data/restraints/parameters                  | 3539/1/273                                                                    |
| Goodness-of-fit on F <sup>2</sup>           | 1.055                                                                         |
| Final R indexes [ $I \geq 2\sigma(I)$ ]     | $R_1$ = 0.0397, $wR_2$ = 0.1030                                               |
| Final R indexes [all data]                  | $R_1$ = 0.0464, $wR_2$ = 0.1073                                               |
| Largest diff. peak/hole / e Å <sup>-3</sup> | 0.63/-0.36                                                                    |

## X-ray crystal data of compound 5c

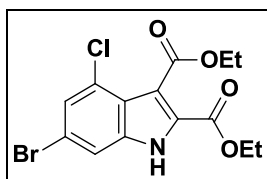

**Sample preparation** : A solution of compound **5c** (30 mg) in CH<sub>2</sub>Cl<sub>2</sub> (10 mL) was placed in a tube (10 mL). EtOAc (2 mL) was added slowly to the vial with a dropper. The vial was closed with little cotton and kept at room temperature for 2 days. Then, colorless prisms were observed.

**Crystal measurement** : X-ray crystal structures were determined with a Bruker Enraf-Nonius single-crystal diffractometer (CAD4, Kappa CCD). Thermal ellipsoids are drawn at 50% probability level.

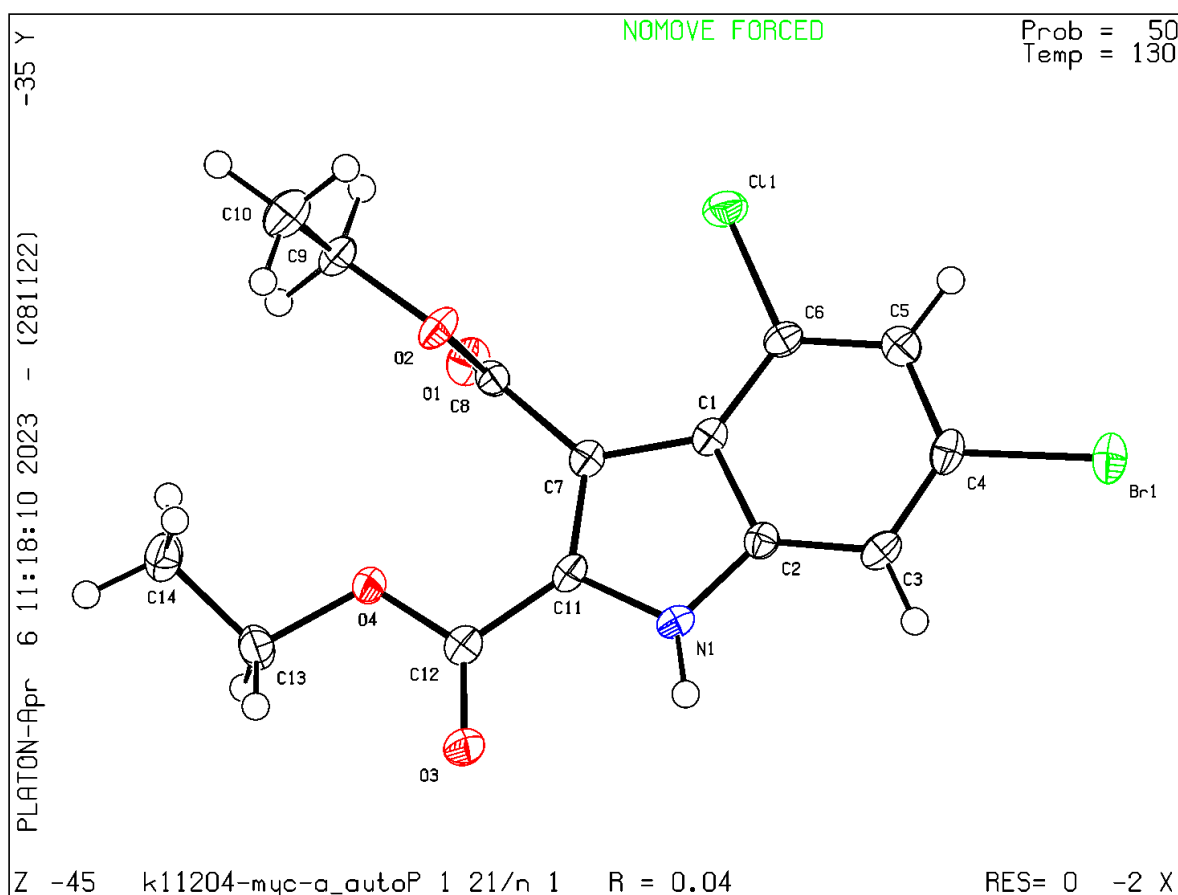

|                                             |                                                               |
|---------------------------------------------|---------------------------------------------------------------|
| Empirical formula                           | C <sub>14</sub> H <sub>13</sub> BrClNO <sub>4</sub>           |
| Formula weight                              | 374.61                                                        |
| Temperature/K                               | 130(2)                                                        |
| Crystal system                              | monoclinic                                                    |
| Space group                                 | P2 <sub>1</sub> /n                                            |
| a/Å                                         | 7.4292(3)                                                     |
| b/Å                                         | 16.5544(8)                                                    |
| c/Å                                         | 12.3299(5)                                                    |
| α/°                                         | 90                                                            |
| β/°                                         | 96.297(4)                                                     |
| γ/°                                         | 90                                                            |
| Volume/Å <sup>3</sup>                       | 1507.26(11)                                                   |
| Z                                           | 4                                                             |
| ρ <sub>calc</sub> /cm <sup>3</sup>          | 1.651                                                         |
| μ/mm <sup>-1</sup>                          | 2.918                                                         |
| F(000)                                      | 752.0                                                         |
| Crystal size/mm <sup>3</sup>                | 0.5 × 0.4 × 0.2                                               |
| Radiation                                   | Mo Kα (λ = 0.71073)                                           |
| 2θ range for data collection/°              | 4.136 to 54.166                                               |
| Index ranges                                | -9 ≤ h ≤ 8, -21 ≤ k ≤ 21, -15 ≤ l ≤ 15                        |
| Reflections collected                       | 20549                                                         |
| Independent reflections                     | 3138 [R <sub>int</sub> = 0.0520, R <sub>sigma</sub> = 0.0447] |
| Data/restraints/parameters                  | 3138/0/192                                                    |
| Goodness-of-fit on F <sup>2</sup>           | 1.024                                                         |
| Final R indexes [I ≥ 2σ (I)]                | R <sub>1</sub> = 0.0387, wR <sub>2</sub> = 0.0854             |
| Final R indexes [all data]                  | R <sub>1</sub> = 0.0478, wR <sub>2</sub> = 0.0884             |
| Largest diff. peak/hole / e Å <sup>-3</sup> | 1.25/-0.96                                                    |

## X-ray crystal data of compound 6b

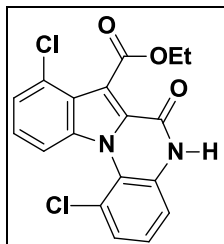

**Sample preparation** : A solution of compound **6b** (30 mg) in CH<sub>2</sub>Cl<sub>2</sub> (10 mL) was placed in a tube (10 mL). EtOAc (2 mL) was added slowly to the vial with a dropper. The vial was closed with little cotton and kept at room temperature for 2 days. Then, colorless prisms were observed.

**Crystal measurement** : X-ray crystal structures were determined with a Bruker Enraf-Nonius single-crystal diffractometer (CAD4, Kappa CCD). Thermal ellipsoids are drawn at 50% probability level.

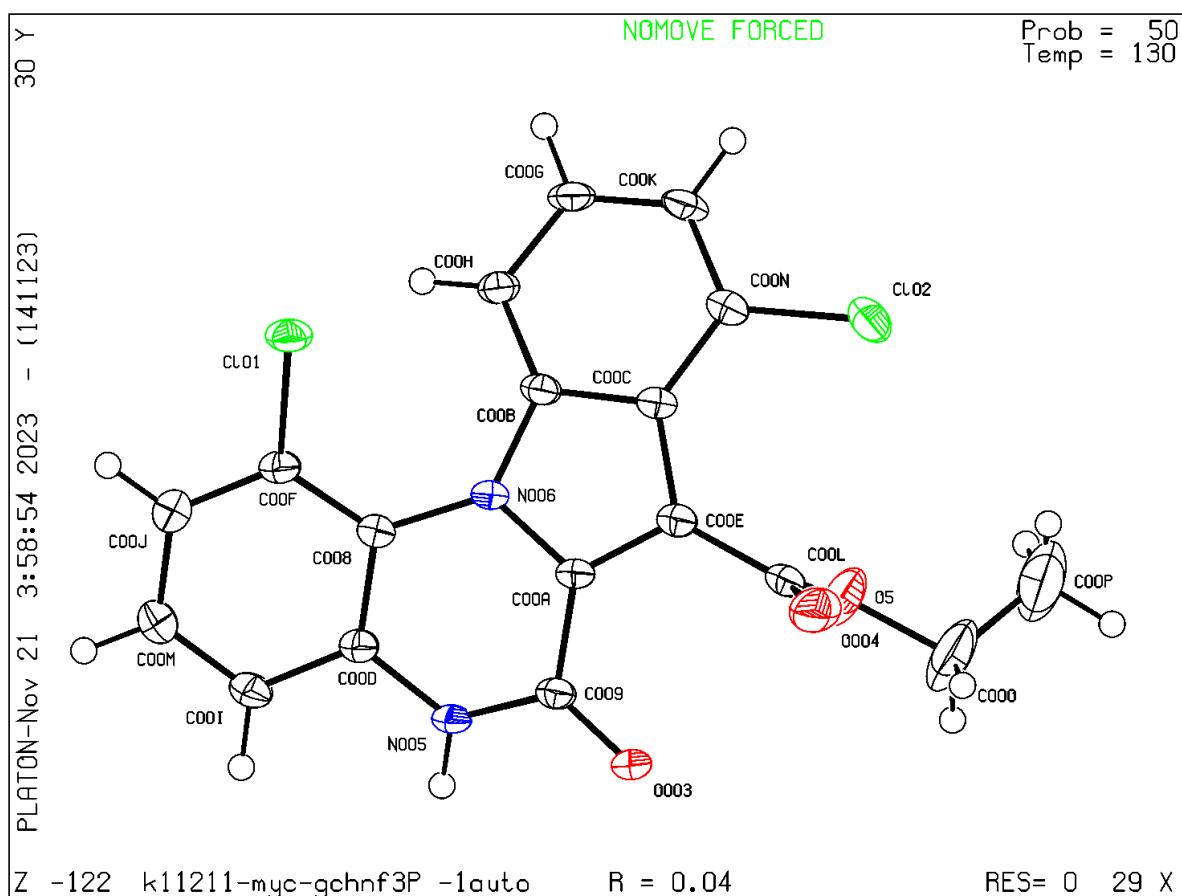

|                                             |                                                                               |
|---------------------------------------------|-------------------------------------------------------------------------------|
| Empirical formula                           | C <sub>18</sub> H <sub>12</sub> Cl <sub>2</sub> N <sub>2</sub> O <sub>3</sub> |
| Formula weight                              | 375.20                                                                        |
| Temperature/K                               | 130(2)                                                                        |
| Crystal system                              | triclinic                                                                     |
| Space group                                 | P-1                                                                           |
| a/Å                                         | 8.2481(2)                                                                     |
| b/Å                                         | 10.2725(2)                                                                    |
| c/Å                                         | 10.6752(2)                                                                    |
| α/°                                         | 68.739(2)                                                                     |
| β/°                                         | 77.265(2)                                                                     |
| γ/°                                         | 87.293(2)                                                                     |
| Volume/Å <sup>3</sup>                       | 821.67(3)                                                                     |
| Z                                           | 2                                                                             |
| ρ <sub>calc</sub> /g/cm <sup>3</sup>        | 1.516                                                                         |
| μ/mm <sup>-1</sup>                          | 0.416                                                                         |
| F(000)                                      | 384.0                                                                         |
| Crystal size/mm <sup>3</sup>                | 0.5 × 0.5 × 0.5                                                               |
| Radiation                                   | Mo Kα (λ = 0.71073)                                                           |
| 2θ range for data collection/°              | 4.196 to 54.088                                                               |
| Index ranges                                | -10 ≤ h ≤ 10, -13 ≤ k ≤ 13, -13 ≤ l ≤ 13                                      |
| Reflections collected                       | 22394                                                                         |
| Independent reflections                     | 3443 [R <sub>int</sub> = 0.0419, R <sub>sigma</sub> = 0.0245]                 |
| Data/restraints/parameters                  | 3443/402/227                                                                  |
| Goodness-of-fit on F <sup>2</sup>           | 1.067                                                                         |
| Final R indexes [I ≥ 2σ (I)]                | R <sub>1</sub> = 0.0382, wR <sub>2</sub> = 0.0997                             |
| Final R indexes [all data]                  | R <sub>1</sub> = 0.0431, wR <sub>2</sub> = 0.1031                             |
| Largest diff. peak/hole / e Å <sup>-3</sup> | 0.58/-0.43                                                                    |

Figure S1. Free energy profile from **INT-3** to **INT-4**.

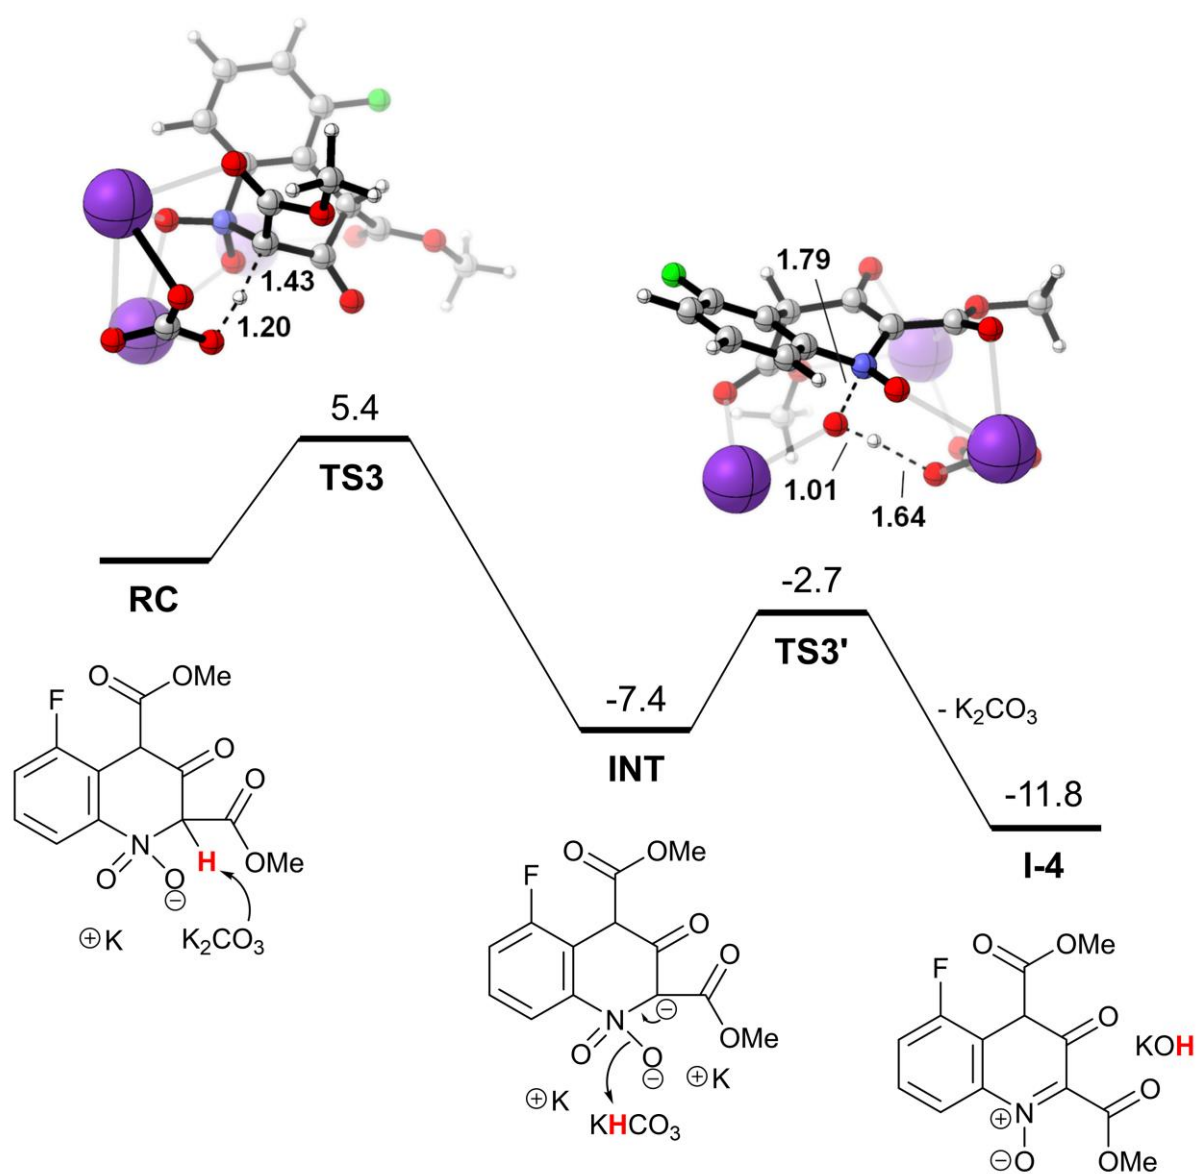

Supplement: d4ob00488d2.pdf [file d4ob00488d2.pdf]
